# Supplementary material for: Taking Kinetic Evaluations of Degradation Data to the Next Level with Nonlinear Mixed-Effects Models
Source: MDPI journal article supplement (doi:10.3390/environments8080071), 2021-07-28
Supplement: s1 [file s1]

# Supporting Information to ‘Taking kinetic evaluation of degradation data to the next level with nonlinear mixed-effects models’

PD Dr. Johannes Ranke  
Wissenschaftlicher Berater  
Kronacher Str. 12  
79639 Grenzach-Wyhlen  
Germany  
johannes.ranke@jrwb.de

Sponsor: German Environment Agency (UBA)  
Wörlitzer Platz 1, 06844 Dessau-Roßlau, Germany

Report ID: jrwb-172

UBA project number 146839

26 July 2021

292 pages

## Contents

|                                                                 |           |
|-----------------------------------------------------------------|-----------|
| <b>Title page</b>                                               | <b>1</b>  |
| <b>Contents</b>                                                 | <b>3</b>  |
| <b>Generation of synthetic data</b>                             | <b>10</b> |
| Simple exponential decline . . . . .                            | 11        |
| Biphasic decline with a transformation product . . . . .        | 12        |
| <b>Evaluation of synthetic data</b>                             | <b>14</b> |
| Simple exponential decline . . . . .                            | 14        |
| Geometric mean half-life of 15 days . . . . .                   | 14        |
| Geometric mean half-life of 120 days . . . . .                  | 20        |
| Geometric mean half-life of 500 days . . . . .                  | 26        |
| Geometric mean half-life of 800 days . . . . .                  | 32        |
| Biphasic decline with a metabolite . . . . .                    | 39        |
| <b>Evaluation of experimental data</b>                          | <b>48</b> |
| EU risk assessment of 2,4-D from 2014 . . . . .                 | 48        |
| Separate kinetic fits for the parent compound . . . . .         | 48        |
| Simultaneous kinetic fits for the parent compound . . . . .     | 51        |
| Separate pathway fits . . . . .                                 | 53        |
| Simultaneous pathway fits . . . . .                             | 67        |
| Check of transformations . . . . .                              | 78        |
| Endpoint comparisons . . . . .                                  | 78        |
| EU risk assessment of dimethenamid-P from 2018 . . . . .        | 82        |
| Separate evaluations . . . . .                                  | 83        |
| Simultaneous evaluations . . . . .                              | 90        |
| <b>References</b>                                               | <b>98</b> |
| <b>Appendix</b>                                                 | <b>99</b> |
| Listings for separate parent only fits for 2,4-D . . . . .      | 99        |
| Listings for simultaneous fits for 2,4-D, parent only . . . . . | 119       |
| Listings for separate pathway fits for 2,4-D . . . . .          | 124       |
| Listings for simultaneous pathway fits for 2,4-D . . . . .      | 172       |

Listings for separate fits for dimethenamid . . . . . 186

Listing for the mixed effects model fits for dimethenamid . . . . . 279

## List of Tables

|    |                                                                                                                          |    |
|----|--------------------------------------------------------------------------------------------------------------------------|----|
| 1  | Population parameter distributions used for the synthetic SFO datasets . . . . .                                         | 11 |
| 2  | Population parameter distributions used for the synthetic DFOP-SFO datasets . . . . .                                    | 13 |
| 3  | Statistics for half-lives derived from 100 datasets with five groups, input half-life 15 days                            | 19 |
| 4  | Statistics for half-lives derived from 100 datasets with five groups, input half-life 120 days                           | 25 |
| 5  | Statistics for half-lives derived from 100 datasets with five groups, input half-life 500 days                           | 31 |
| 6  | Statistics for half-lives derived from 100 datasets with five groups, input half-life 800 days                           | 38 |
| 7  | SFO-SFO population parameters for DFOP-SFO dataset 1 . . . . .                                                           | 40 |
| 8  | DFOP-SFO population parameters for DFOP-SFO dataset 1 . . . . .                                                          | 41 |
| 9  | SFO-SFO population parameters for DFOP-SFO dataset 2 . . . . .                                                           | 42 |
| 10 | DFOP-SFO population parameters for DFOP-SFO dataset 2 . . . . .                                                          | 43 |
| 11 | SFO-SFO population parameters for DFOP-SFO dataset 3 . . . . .                                                           | 44 |
| 12 | DFOP-SFO population parameters for DFOP-SFO dataset 3 . . . . .                                                          | 45 |
| 13 | Model parameters with confidence intervals and p-values . . . . .                                                        | 50 |
| 14 | Model parameters with confidence intervals and p-values . . . . .                                                        | 55 |
| 15 | Model parameters with confidence intervals and p-values . . . . .                                                        | 58 |
| 16 | Model parameters with confidence intervals and p-values . . . . .                                                        | 61 |
| 17 | Model parameters with confidence intervals and p-values . . . . .                                                        | 65 |
| 18 | Non-normalised endpoints for modelling as obtained in the separate fits to the data .                                    | 78 |
| 19 | Normalised modelling DT <sub>50</sub> values as obtained in the separate fits to the data . . . . .                      | 78 |
| 20 | Modelling endpoints derived from mixed effects models fitted to the pathway . . . . .                                    | 79 |
| 21 | AIC values for the separate fits of three degradation models to data from six soils using constant variance . . . . .    | 87 |
| 22 | AIC values for the separate fits of three degradation models to data from six soils using variance by variable . . . . . | 87 |
| 23 | AIC values for the separate fits of three degradation models to data from six soils using two-component error . . . . .  | 87 |

## List of Figures

|   |                                                                                                                                 |    |
|---|---------------------------------------------------------------------------------------------------------------------------------|----|
| 1 | Separate fits to an example dataset with mean input half-life 15 days, constant variance error model . . . . .                  | 15 |
| 2 | Separate fits to an example dataset with mean input half-life 15 days, two-component error model . . . . .                      | 16 |
| 3 | Combined plot of separate fits to an example dataset with mean input half-life 15 days, constant variance error model . . . . . | 17 |

|    |                                                                                                                                  |    |
|----|----------------------------------------------------------------------------------------------------------------------------------|----|
| 4  | Combined plot of separate fits to an example dataset with mean input half-life 15 days, two-component error model . . . . .      | 17 |
| 5  | SFO fit with saemix to an example dataset with mean input half-life 15 days, constant variance . . . . .                         | 18 |
| 6  | SFO fit with saemix to an example dataset with mean input half-life 15 days, two-component error model . . . . .                 | 18 |
| 7  | Boxplots of half-lives derived from 100 datasets for five groups, input 15 days . . . . .                                        | 19 |
| 8  | Separate fits to an example dataset with mean input half-life 120 days, constant variance error model . . . . .                  | 21 |
| 9  | Separate fits to an example dataset with mean input half-life 120 days, two-component error model . . . . .                      | 22 |
| 10 | Combined plot of separate fits to an example dataset with mean input half-life 120 days, constant variance error model . . . . . | 23 |
| 11 | Combined plot of separate fits to an example dataset with mean input half-life 120 days, two-component error model . . . . .     | 23 |
| 12 | SFO fit with saemix to an example dataset with mean input half-life 120 days, constant variance . . . . .                        | 24 |
| 13 | SFO fit with saemix to an example dataset with mean input half-life 120 days, two-component error model . . . . .                | 24 |
| 14 | Boxplots of half-lives derived from 100 datasets for five groups, input 120 days . . . . .                                       | 25 |
| 15 | Separate fits to an example dataset with mean input half-life 500 days, constant variance error model . . . . .                  | 27 |
| 16 | Separate fits to an example dataset with mean input half-life 500 days, two-component error model . . . . .                      | 28 |
| 17 | Combined plot of separate fits to an example dataset with mean input half-life 500 days, constant variance error model . . . . . | 29 |
| 18 | Combined plot of separate fits to an example dataset with mean input half-life 500 days, two-component error model . . . . .     | 29 |
| 19 | SFO fit with saemix to an example dataset with mean input half-life 500 days, constant variance . . . . .                        | 30 |
| 20 | SFO fit with saemix to an example dataset with mean input half-life 500 days, two-component error model . . . . .                | 30 |
| 21 | Boxplots of half-lives derived from 100 datasets for five groups, input 500 days . . . . .                                       | 31 |
| 22 | Separate fits to an example dataset with mean input half-life 800 days, constant variance error model . . . . .                  | 33 |
| 23 | Separate fits to an example dataset with mean input half-life 800 days, two-component error model . . . . .                      | 34 |
| 24 | Combined plot of separate fits to an example dataset with mean input half-life 800 days, constant variance error model . . . . . | 35 |

|    |                                                                                                                              |    |
|----|------------------------------------------------------------------------------------------------------------------------------|----|
| 25 | Combined plot of separate fits to an example dataset with mean input half-life 800 days, two-component error model . . . . . | 35 |
| 26 | SFO fit with saemix to an example dataset with mean input half-life 800 days, constant variance . . . . .                    | 36 |
| 27 | SFO fit with saemix to an example dataset with mean input half-life 800 days, two-component error model . . . . .            | 36 |
| 28 | SFO fits with mkin and saemix to an example dataset with mean input half-life 800 days, constant variance . . . . .          | 37 |
| 29 | Boxplots for the half-lives derived from 100 datasets for five groups, half-life 800 days                                    | 37 |
| 30 | SFO-SFO saemix fit with two-component variance for DFOP-SFO dataset 1 . . . . .                                              | 40 |
| 31 | DFOP-SFO saemix fit with two-component variance for DFOP-SFO dataset 1 . . . . .                                             | 41 |
| 32 | SFO-SFO saemix fit with two-component variance for DFOP-SFO dataset 2 . . . . .                                              | 42 |
| 33 | DFOP-SFO saemix fit with two-component variance for DFOP-SFO dataset 2 . . . . .                                             | 43 |
| 34 | SFO-SFO saemix fit with two-component variance for DFOP-SFO dataset 3 . . . . .                                              | 44 |
| 35 | DFOP-SFO saemix fit with constant variance for DFOP-SFO dataset 3 . . . . .                                                  | 45 |
| 36 | Selected population parameters obtained with DFOP-SFO for the biphasic datasets . .                                          | 46 |
| 37 | Population parameters obtained with DFOP-SFO for the biphasic datasets . . . . .                                             | 47 |
| 38 | SFO parent kinetics in the datasets for 2,4-D . . . . .                                                                      | 49 |
| 39 | Mixed model SFO kinetics in the datasets for 2,4-D fitted by nlme . . . . .                                                  | 52 |
| 40 | Mixed model SFO kinetics in the datasets for 2,4-D fitted by saemix . . . . .                                                | 52 |
| 41 | SFO-SFO-SFO fit for 2,4-D, Fayette . . . . .                                                                                 | 53 |
| 42 | SFO-SFO(ns)-SFO fit for 2,4-D, Fayette . . . . .                                                                             | 54 |
| 43 | SFO-SFO-SFO fit for 2,4-D, RefSol 03-G . . . . .                                                                             | 57 |
| 44 | SFO-SFO-SFO fit for 2,4-D, Site E1 . . . . .                                                                                 | 60 |
| 45 | SFO-SFO(ns)-SFO fit for 2,4-D, Site E1 . . . . .                                                                             | 62 |
| 46 | SFO-SFO-SFO fit for 2,4-D, Site I2 . . . . .                                                                                 | 64 |
| 47 | SFO-SFO(ns)-SFO fitted using nlme assuming constant error . . . . .                                                          | 68 |
| 48 | SFO-SFO-SFO(ns) fitted using nlme assuming variance by variable . . . . .                                                    | 69 |
| 49 | SFO-SFO(ns)-SFO fitted using nlme assuming two-component error . . . . .                                                     | 70 |
| 50 | Convergence plot for SFO-SFO-SFO fitted using saemix assuming two-component error                                            | 71 |
| 51 | SFO-SFO-SFO fitted using saemix assuming two-component error . . . . .                                                       | 72 |
| 52 | SFO-SFO-SFO fitted using saemix assuming two-component error . . . . .                                                       | 73 |
| 53 | Convergence plot for SFO-SFO(ns)-SFO fitted using saemix assuming constant error .                                           | 74 |
| 54 | SFO-SFO(ns)-SFO fitted using saemix assuming constant error . . . . .                                                        | 75 |
| 55 | Convergence plot for SFO-SFO(ns)-SFO fitted using saemix assuming two-component error . . . . .                              | 76 |

|    |                                                                                                                                                                                                         |    |
|----|---------------------------------------------------------------------------------------------------------------------------------------------------------------------------------------------------------|----|
| 56 | SFO-SFO(ns)-SFO fitted using saemix assuming two-component error . . . . .                                                                                                                              | 77 |
| 57 | Overlay of degradation curves derived from separate fits and the best saemix fit, first 30 days . . . . .                                                                                               | 80 |
| 58 | Overlay of degradation curves derived from separate fits and the best nlme fit, first 30 days                                                                                                           | 81 |
| 59 | Separate fits of the SFO-SFO3 model to the normalised DMTA data assuming constant variance . . . . .                                                                                                    | 84 |
| 60 | Separate fits of the SFO-SFO3+ model to the normalised DMTA data assuming constant variance . . . . .                                                                                                   | 85 |
| 61 | Separate fits of the DFOP-SFO3+ model to the normalised DMTA data assuming two-component error . . . . .                                                                                                | 88 |
| 62 | Separate fits of the DFOP-SFO3+ model to the normalised DMTA data assuming two-component error, average curve only considering rate constants that can be distinguished from zero . . . . .             | 89 |
| 63 | Convergence plot of the saemix fit of the SFO-SFO3 model with constant variance to the normalised DMTA data . . . . .                                                                                   | 90 |
| 64 | SFO-SFO3 model with constant variance fitted with saemix to the data for DMTA in six soils, with additional degradation curves derived from separate evaluations for comparison . . . . .               | 91 |
| 65 | Convergence plot of the saemix fit of the SFO-SFO3+ model with constant variance to the normalised DMTA data . . . . .                                                                                  | 92 |
| 66 | SFO-SFO3+ model with constant variance fitted with saemix to the data for DMTA in six soils, with additional degradation curves derived from separate evaluations for comparison . . . . .              | 93 |
| 67 | Convergence plot of the saemix fit of the DFOP-SFO3+ model with two-component error to the normalised DMTA data . . . . .                                                                               | 94 |
| 68 | DFOP-SFO3+ model with two-component error fitted with saemix to the data for DMTA in six soils, with additional degradation curves derived from untested parameters from separate evaluations . . . . . | 95 |
| 69 | DFOP-SFO3+ model with two-component error fitted with saemix to the data for DMTA in six soils, with additional degradation curves derived from tested parameters from separate evaluations . . . . .   | 96 |

## List of Listings

|   |                                               |     |
|---|-----------------------------------------------|-----|
| 1 | SFO fit to Mississippi data, 2,4-D . . . . .  | 99  |
| 2 | FOMC fit to Mississippi data, 2,4-D . . . . . | 101 |
| 3 | SFO fit to Fayette data, 2,4-D . . . . .      | 103 |
| 4 | FOMC fit to Fayette data, 2,4-D . . . . .     | 105 |
| 5 | SFO fit to RefSol 03-G data, 2,4-D . . . . .  | 107 |
| 6 | FOMC fit to RefSol 03-G data, 2,4-D . . . . . | 109 |

|    |                                                                             |     |
|----|-----------------------------------------------------------------------------|-----|
| 7  | SFO fit to Site E1 data, 2,4-D . . . . .                                    | 111 |
| 8  | FOMC fit to Site E1 data, 2,4-D . . . . .                                   | 113 |
| 9  | SFO fit to Site I2 data, 2,4-D . . . . .                                    | 115 |
| 10 | FOMC fit to Site I2 data, 2,4-D . . . . .                                   | 117 |
| 11 | SFO fit with nlme to 2,4-D data, constant variance . . . . .                | 119 |
| 12 | SFO fit with nlme to 2,4-D data, two-component error . . . . .              | 120 |
| 13 | SFO fit with saemix to 2,4-D data, constant variance . . . . .              | 121 |
| 14 | SFO fit with saemix to 2,4-D data, two-component error . . . . .            | 122 |
| 15 | FOMC fit with saemix to 2,4-D data, constant variance . . . . .             | 123 |
| 16 | SFO-SFO-SFO fit to Fayette data, variance by variable . . . . .             | 124 |
| 17 | SFO-SFO(ns)-SFO fit to Fayette data, variance by variable . . . . .         | 127 |
| 18 | SFO-SFO-SFO fit to Fayette data, two-component error . . . . .              | 130 |
| 19 | SFO-SFO(ns)-SFO fit to Fayette data, two-component error . . . . .          | 133 |
| 20 | SFO-SFO-SFO fit to RefSol 03-G data, variance by variable . . . . .         | 136 |
| 21 | SFO-SFO(ns)-SFO fit to RefSol 03-G data, variance by variable . . . . .     | 139 |
| 22 | SFO-SFO-SFO fit to RefSol 03-G data, two-component error . . . . .          | 142 |
| 23 | SFO-SFO(ns)-SFO fit to RefSol 03-G data, two-component error . . . . .      | 145 |
| 24 | SFO-SFO-SFO fit to Site E1 data, variance by variable . . . . .             | 148 |
| 25 | SFO-SFO(ns)-SFO fit to Site E1 data, variance by variable . . . . .         | 151 |
| 26 | SFO-SFO-SFO fit to Site E1 data, two-component error . . . . .              | 154 |
| 27 | SFO-SFO(ns)-SFO fit to Site E1 data, two-component error . . . . .          | 157 |
| 28 | SFO-SFO-SFO fit to Site I2 data, variance by variable . . . . .             | 160 |
| 29 | SFO-SFO(ns)-SFO fit to Site I2 data, variance by variable . . . . .         | 163 |
| 30 | SFO-SFO-SFO fit to Site I2 data, two-component error . . . . .              | 166 |
| 31 | SFO-SFO(ns)-SFO fit to Site I2 data, two-component error . . . . .          | 169 |
| 32 | SFO-SFO-SFO fit with nlme to 2,4-D data, two-component error . . . . .      | 172 |
| 33 | SFO-SFO(ns)-SFO fit with nlme to 2,4-D data, constant variance . . . . .    | 174 |
| 34 | SFO-SFO(ns)-SFO fit with nlme to 2,4-D data, variance by variable . . . . . | 176 |
| 35 | SFO-SFO(ns)-SFO fit with nlme to 2,4-D data, two-component error . . . . .  | 178 |
| 36 | SFO-SFO-SFO fit with saem to 2,4-D data, two-component error . . . . .      | 180 |
| 37 | SFO-SFO(ns)-SFO fit with saem to 2,4-D data, constant variance . . . . .    | 182 |
| 38 | SFO-SFO(ns)-SFO fit with saem to 2,4-D data, two-component error . . . . .  | 184 |
| 39 | SFO-SFO3 fit to Calke data, constant variance . . . . .                     | 186 |
| 40 | SFO-SFO3 fit to Calke data, two-component error . . . . .                   | 189 |



|    |                                                                                |     |
|----|--------------------------------------------------------------------------------|-----|
| 41 | SFO-SFO3 fit to Flaach data, constant variance . . . . .                       | 192 |
| 42 | SFO-SFO3 fit to Flaach data, two-component error . . . . .                     | 196 |
| 43 | SFO-SFO3 fit to BBA 2.2 data, constant variance . . . . .                      | 201 |
| 44 | SFO-SFO3 fit to BBA 2.2 data, two-component error . . . . .                    | 205 |
| 45 | SFO-SFO3 fit to BBA 2.3 data, constant variance . . . . .                      | 209 |
| 46 | SFO-SFO3 fit to BBA 2.3 data, two-component error . . . . .                    | 213 |
| 47 | SFO-SFO3 fit to Borstel data, constant variance . . . . .                      | 217 |
| 48 | SFO-SFO3 fit to Borstel data, two-component error . . . . .                    | 220 |
| 49 | SFO-SFO3 fit to Elliot data, constant variance . . . . .                       | 223 |
| 50 | SFO-SFO3 fit to Elliot data, two-component error . . . . .                     | 228 |
| 51 | SFO-SFO3b fit to Calke data, constant variance . . . . .                       | 233 |
| 52 | SFO-SFO3b fit to Calke data, two-component error . . . . .                     | 236 |
| 53 | SFO-SFO3b fit to Flaach data, constant variance . . . . .                      | 239 |
| 54 | SFO-SFO3b fit to Flaach data, two-component error . . . . .                    | 243 |
| 55 | SFO-SFO3b fit to BBA 2.2 data, constant variance . . . . .                     | 247 |
| 56 | SFO-SFO3b fit to BBA 2.2 data, two-component error . . . . .                   | 251 |
| 57 | SFO-SFO3b fit to BBA 2.3 data, constant variance . . . . .                     | 255 |
| 58 | SFO-SFO3b fit to BBA 2.3 data, two-component error . . . . .                   | 259 |
| 59 | SFO-SFO3b fit to Borstel data, constant variance . . . . .                     | 263 |
| 60 | SFO-SFO3b fit to Borstel data, two-component error . . . . .                   | 266 |
| 61 | SFO-SFO3b fit to Elliot data, constant variance . . . . .                      | 269 |
| 62 | SFO-SFO3b fit to Elliot data, two-component error . . . . .                    | 274 |
| 63 | DFOP-SFO3 fit with nlme to dimethenamid data, variance by variable . . . . .   | 279 |
| 64 | DFOP-SFO3 fit with nlme to dimethenamid data, two-component error . . . . .    | 281 |
| 65 | DFOP-SFO3+ fit with nlme to dimethenamid data, variance by variable . . . . .  | 283 |
| 66 | DFOP-SFO3+ fit with nlme to dimethenamid data, two-component error . . . . .   | 285 |
| 67 | SFO-SFO3 fit with saemix to dimethenamid data, constant variance . . . . .     | 287 |
| 68 | SFO-SFO3+ fit with saemix to dimethenamid data, constant variance . . . . .    | 289 |
| 69 | DFOP-SFO3+ fit with saemix to dimethenamid data, two-component error . . . . . | 291 |

This document gives some additional details on the generation of synthetic data, the evaluation methods and more detailed results. It should be viewed in conjunction with the main manuscript.

## Generation of synthetic data

```
sampling_times = c(0, 1, 3, 7, 14, 28, 60, 90, 120)

n_groups_sfo = 5
n_groups_biphasic = 8

trans_sd = 0.5
parent_0_mean = 100
parent_0_sd = 2

n_datasets = 100

err_twocomp = list(const = 1, prop = 0.07)
```

## Simple exponential decline

```

SFO <- mkinmod(parent = mkinsub("SFO"))

sfo_mean_dt50 <- c(15, 120, 500, 800)

ds_sfo <- function(geomean_dt50) {
  mean_parms_ds <- matrix(NA, nrow = n_datasets, ncol = 2,
    dimnames = list(1:n_datasets, c("parent_0", "k_parent")))
  ds <- lapply(1:n_datasets, function(i) {
    parent_0_ds <- rnorm(n_groups_sfo, parent_0_mean, parent_0_sd)
    k_parent_ds <- rlnorm(n_groups_sfo, log(log(2)/geomean_dt50), trans_sd)
    mean_parms_ds[i, "parent_0"] <- mean(parent_0_ds)
    mean_parms_ds[i, "k_parent"] <- geomean(k_parent_ds)

    groups_sfo <- lapply(1:n_groups_sfo, function(j) {
      group_prediction <- mkinpredict(SFO, c(k_parent = k_parent_ds[j]),
        c(parent = parent_0_ds[j]), sampling_times)
      group <- add_err(group_prediction, sdfunc = function(value) {
        sqrt(err_twocomp$const^2 + value^2 * err_twocomp$prop^2)
      }, n = 1)[[1]]
      return(group)
    })
    names(groups_sfo) <- paste("Group", 1:n_groups_sfo)
    return(groups_sfo)
  })
  list(ds = ds, mean_parms = mean_parms_ds)
}

set.seed(123456L)
sfo_data <- lapply(sfo_mean_dt50, ds_sfo)
names(sfo_data) <- paste(sfo_mean_dt50, "days")
ds_sfo_15 <- sfo_data[["15 days"]]$ds
ds_sfo_120 <- sfo_data[["120 days"]]$ds
ds_sfo_500 <- sfo_data[["500 days"]]$ds
ds_sfo_800 <- sfo_data[["800 days"]]$ds

```

**Table 1:** Population parameter distributions used for the synthetic SFO datasets

| Parameter            | Unit                  | Mode      |           |           |           | Standard deviation<br>Variants 1-4 |
|----------------------|-----------------------|-----------|-----------|-----------|-----------|------------------------------------|
|                      |                       | Variant 1 | Variant 2 | Variant 3 | Variant 4 |                                    |
| $p_0$                | [%] <sup>a</sup>      | 100       | 100       | 100       | 100       | 2                                  |
| Half-life            | [days]                | 15 days   | 120 days  | 500 days  | 800 days  |                                    |
| $\lambda$            | [days <sup>-1</sup> ] | 4.62e-02  | 5.78e-03  | 1.39e-03  | 8.66e-04  |                                    |
| log( $\lambda$ days) | [-]                   | -3.07     | -5.15     | -6.58     | -7.05     | 0.5                                |

<sup>a</sup>Percent of the intended initial residue

## Biphasic decline with a transformation product

```

n_datasets_biphasic = 100

DFOP_SFO <- mkinmod(
  parent = mkinsub("DFOP", "m1"),
  m1 = mkinsub("SFO"),
  unload = TRUE, overwrite = TRUE, quiet = TRUE)

mean_parms_biphasic_in <- matrix(NA, nrow = n_datasets_biphasic, ncol = 6)
colnames(mean_parms_biphasic_in) <- c("parent_0", "k_m1", "f_parent_to_m1",
  "k1", "k2", "g")

set.seed(123456L)
ds_biphasic <- lapply(1:n_datasets_biphasic, function(i) {

  parms_biphasic <- as.matrix(data.frame(
    parent_0 = rnorm(n_groups_biphasic, parent_0_mean, parent_0_sd),
    k1 = rlnorm(n_groups_biphasic, log(0.05), trans_sd),
    k2 = rlnorm(n_groups_biphasic, log(0.01), trans_sd),
    g = plogis(rnorm(n_groups_biphasic, qlogis(0.5), trans_sd)),
    f_parent_to_m1 = plogis(rnorm(n_groups_biphasic, qlogis(0.5), trans_sd)),
    k_m1 = rlnorm(n_groups_biphasic, log(0.002), trans_sd)))

  mean_parms_biphasic_in[i, "parent_0"] <- mean(parms_biphasic[, "parent_0"])
  mean_parms_biphasic_in[i, "k_m1"] <- geomean(parms_biphasic[, "k_m1"])
  mean_parms_biphasic_in[i, "f_parent_to_m1"] <- plogis(mean(qlogis(parms_biphasic[, "f_paren
  mean_parms_biphasic_in[i, "k1"] <- geomean(parms_biphasic[, "k1"])
  mean_parms_biphasic_in[i, "k2"] <- geomean(parms_biphasic[, "k2"])
  mean_parms_biphasic_in[i, "g"] <- plogis(mean(qlogis(parms_biphasic[, "g"])))

  ds_biphasic_mean <- lapply(1:n_groups_biphasic,
    function(i) {
      mkinpredict(DFOP_SFO, parms_biphasic[i, 2:6],
        c(parent = parms_biphasic[[i, 1]], m1 = 0), sampling_times)
    }
  )

  ds_biphasic_tmp <- lapply(ds_biphasic_mean, function(ds) {
    add_err(ds,
      sdfunc = function(value) sqrt(err_twocomp$const^2 + value^2 * err_twocomp$prop^2),
      n = 1, secondary = "m1")[[1]]
  })

  names(ds_biphasic_tmp) <- paste("Group", 1:n_groups_biphasic)
  return(ds_biphasic_tmp)
})

```

**Table 2:** Population parameter distributions used for the synthetic DFOP-SFO datasets

| Parameter              | Variable       | Unit                  | Mode  | Standard deviation |
|------------------------|----------------|-----------------------|-------|--------------------|
| $p_0$                  | parent_0       | [%] <sup>a</sup>      | 100   | 2                  |
| $\lambda_1$            | k1             | [days <sup>-1</sup> ] | 0.05  |                    |
| log( $\lambda_1$ days) |                | [-]                   | -3    | 0.5                |
| $\lambda_2$            | k2             | [days <sup>-1</sup> ] | 0.01  |                    |
| log( $\lambda_2$ days) |                | [-]                   | -4.61 | 0.5                |
| $\gamma_1$             | g              | [-]                   | 0.5   |                    |
| logit $\gamma_1$       |                | [-]                   | 0     | 0.5                |
| $\gamma_2$             | f_parent_to_m1 | [-]                   | 0.5   |                    |
| logit $\gamma_2$       |                | [-]                   | 0     | 0.5                |
| $\lambda_3$            | k_m1           | [days <sup>-1</sup> ] | 0.002 |                    |
| log( $\lambda_3$ days) |                | [-]                   | -6.21 | 0.5                |

<sup>a</sup>Percent of the intended initial residue

## Evaluation of synthetic data

### Simple exponential decline

#### Geometric mean half-life of 15 days

Example plots for separate fits in one of the datasets are shown in Figures 1 and 2. The same separate fits combined in a single plot, together with a plot using the geometric mean half-life are shown in Figures 3 and 4. Corresponding example plots of the simultaneous evaluation of this dataset using saemix are shown in Figures 5 and 6.

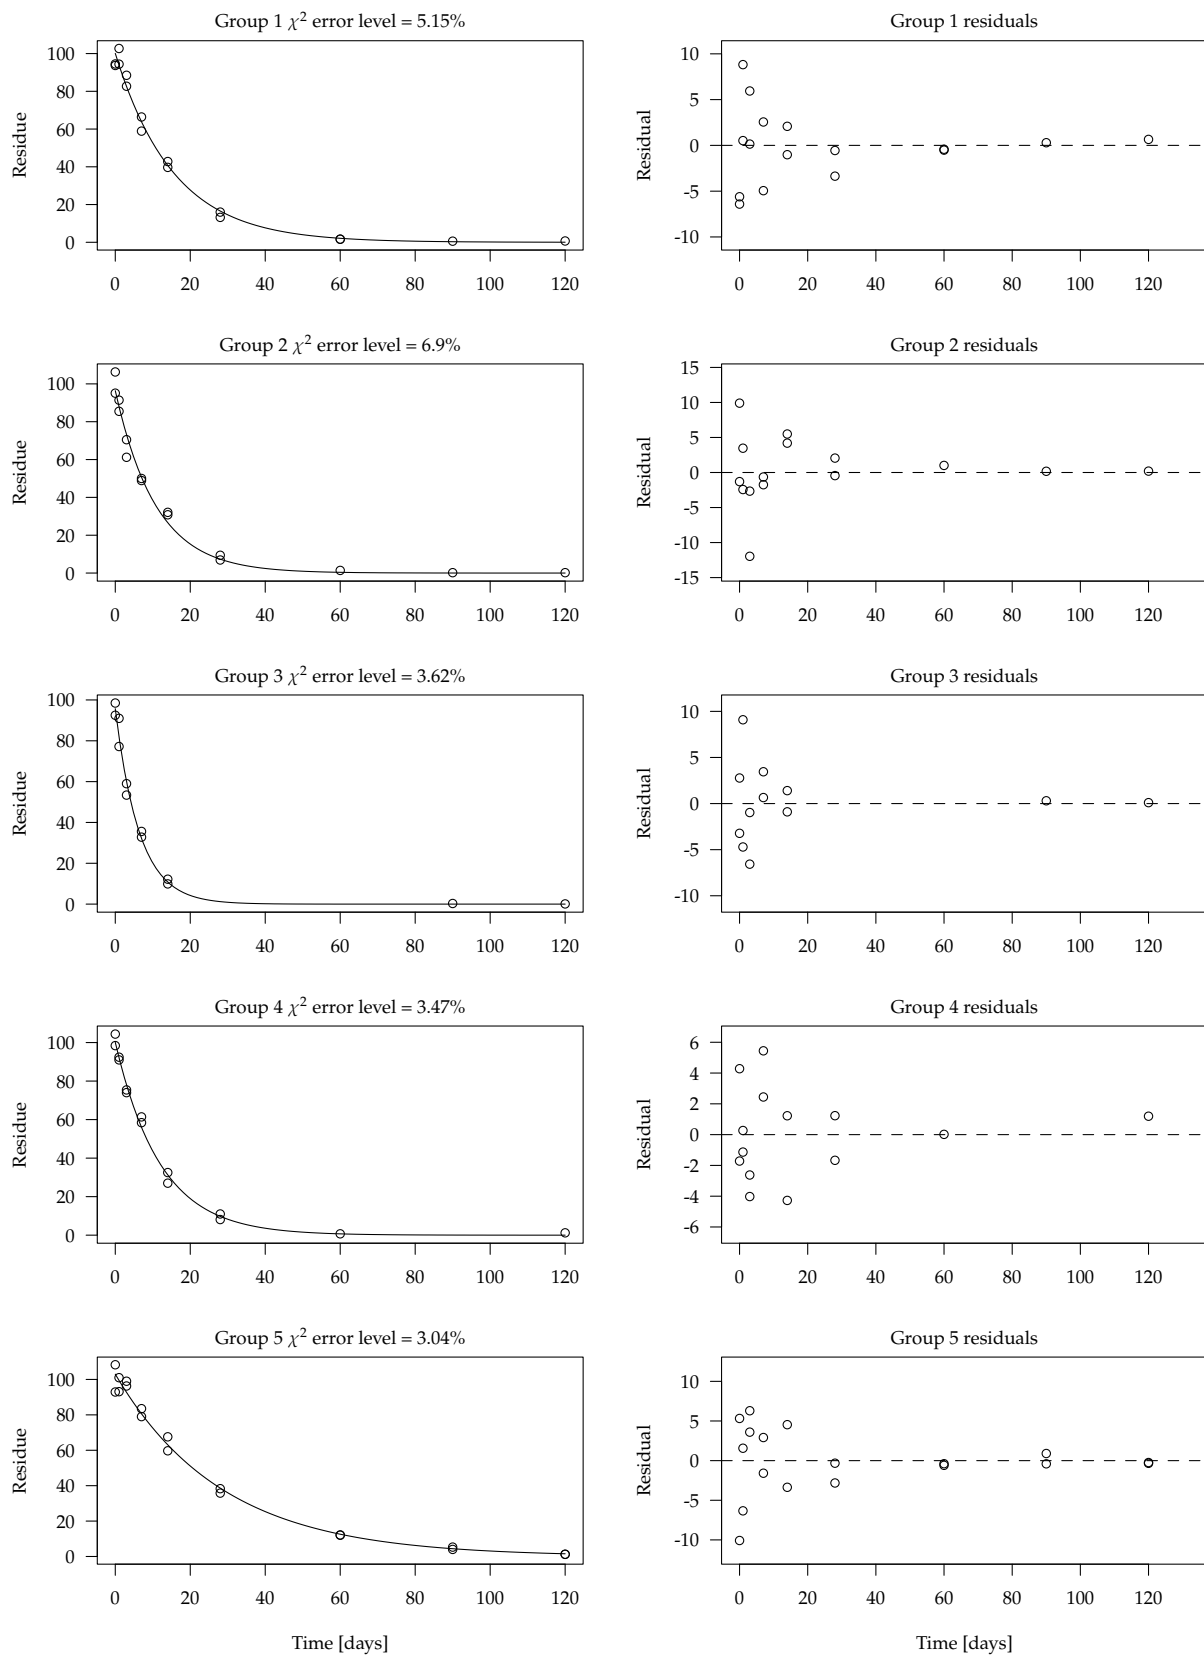

**Figure 1:** Separate fits to an example dataset with mean input half-life 15 days, constant variance error model

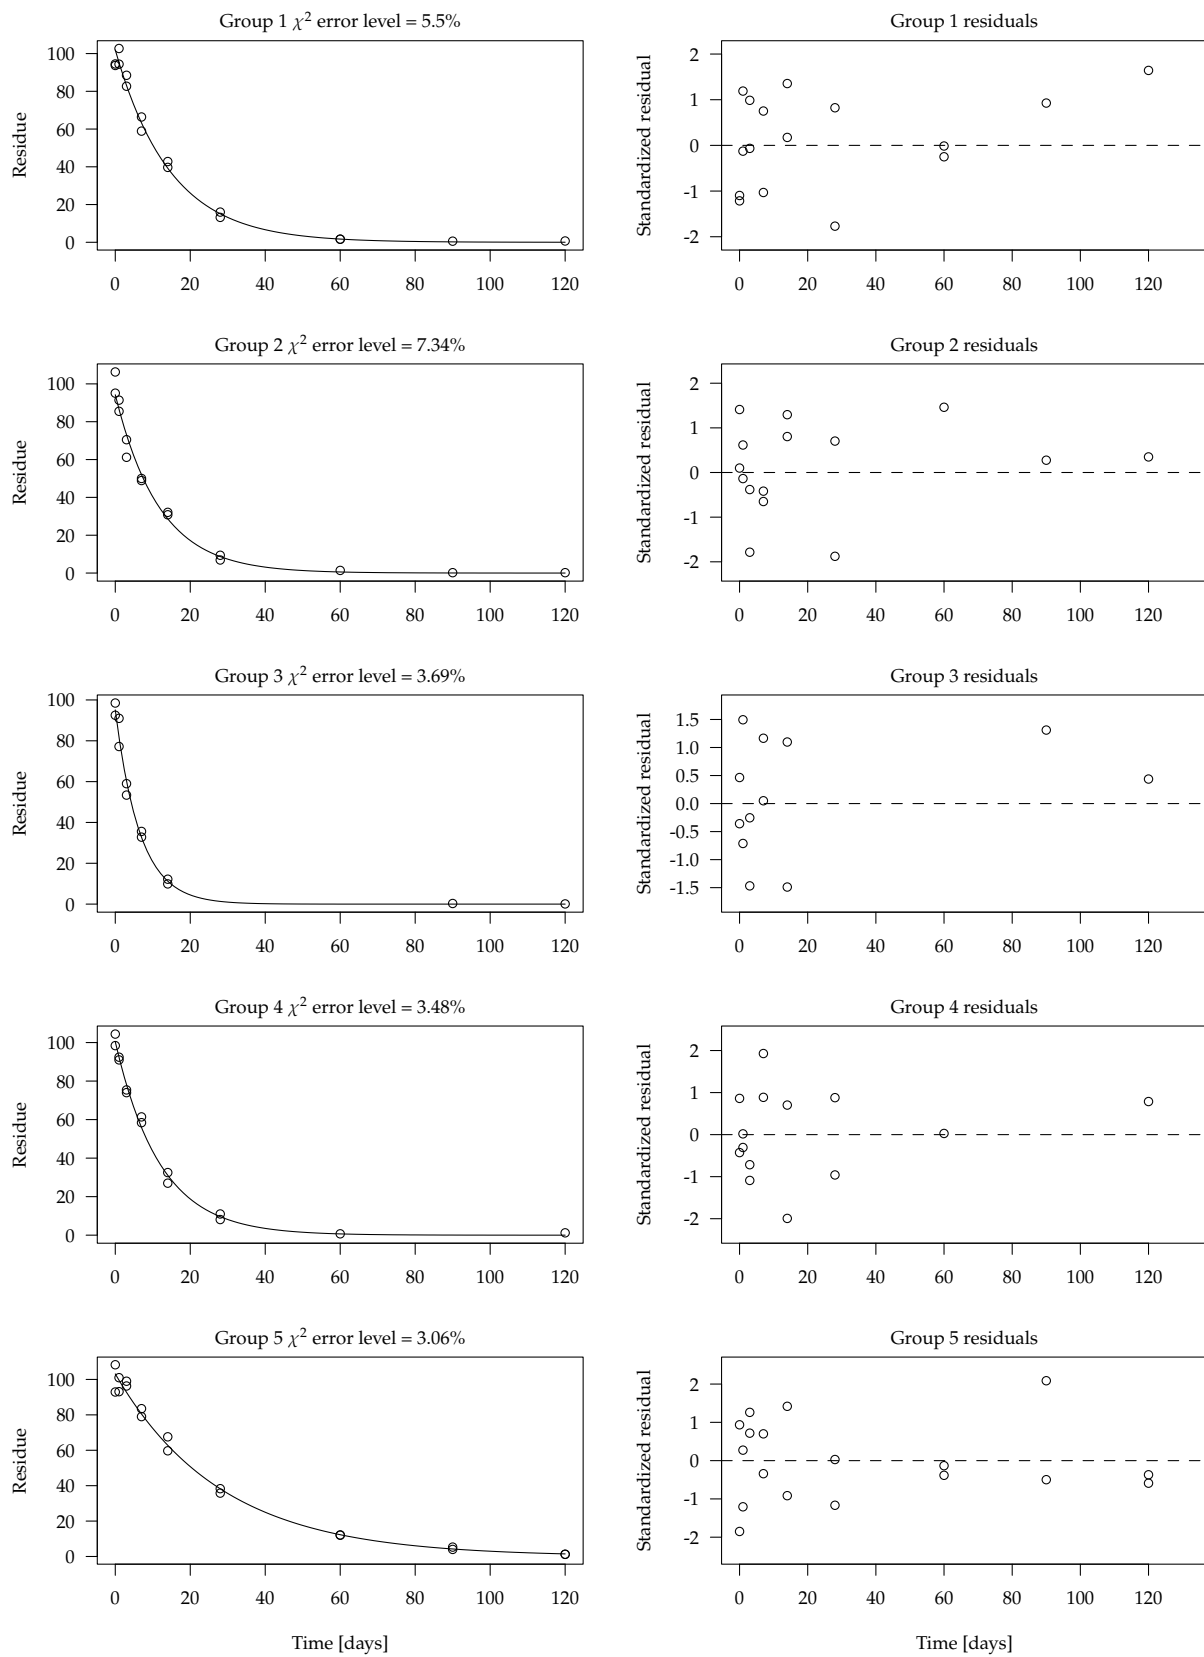

**Figure 2:** Separate fits to an example dataset with mean input half-life 15 days, two-component error model



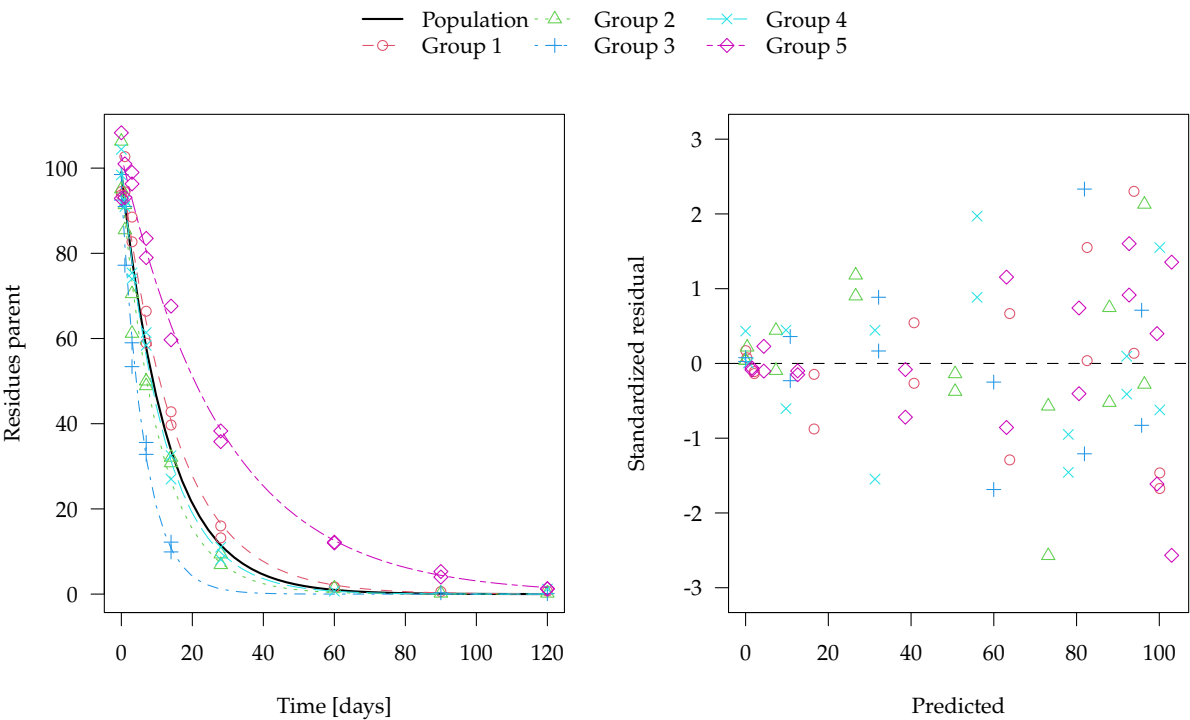

**Figure 3:** Combined plot of separate fits to an example dataset with mean input half-life 15 days, constant variance error model

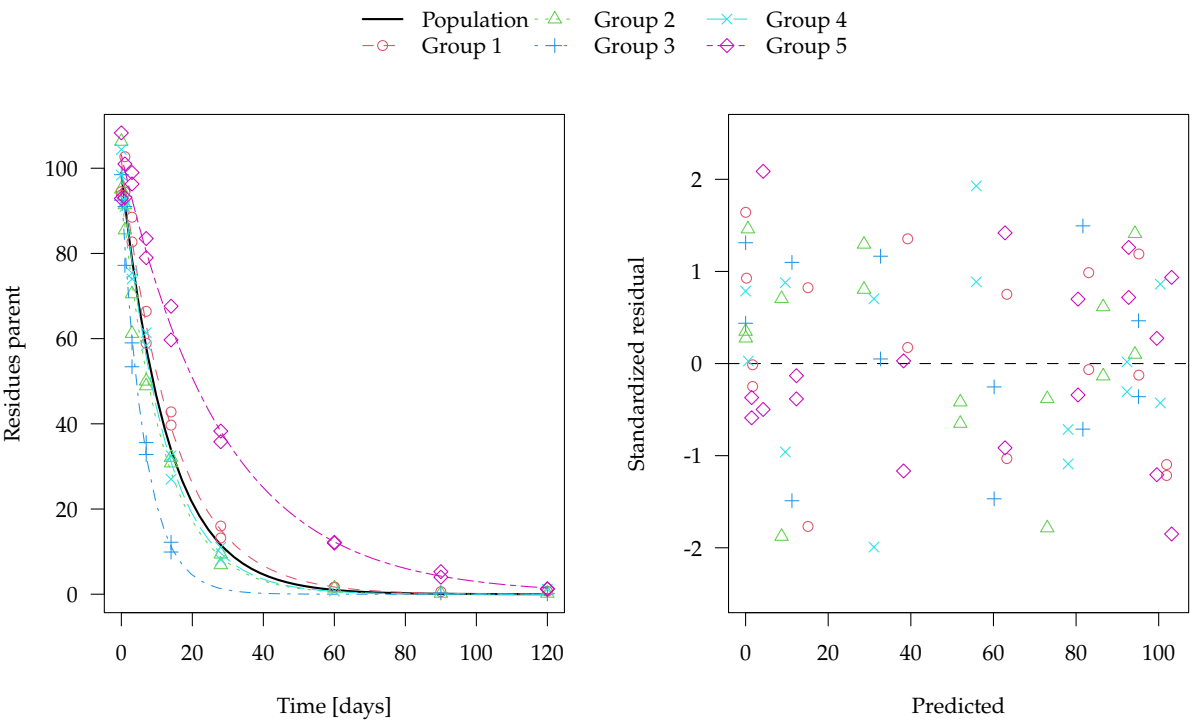

**Figure 4:** Combined plot of separate fits to an example dataset with mean input half-life 15 days, two-component error model

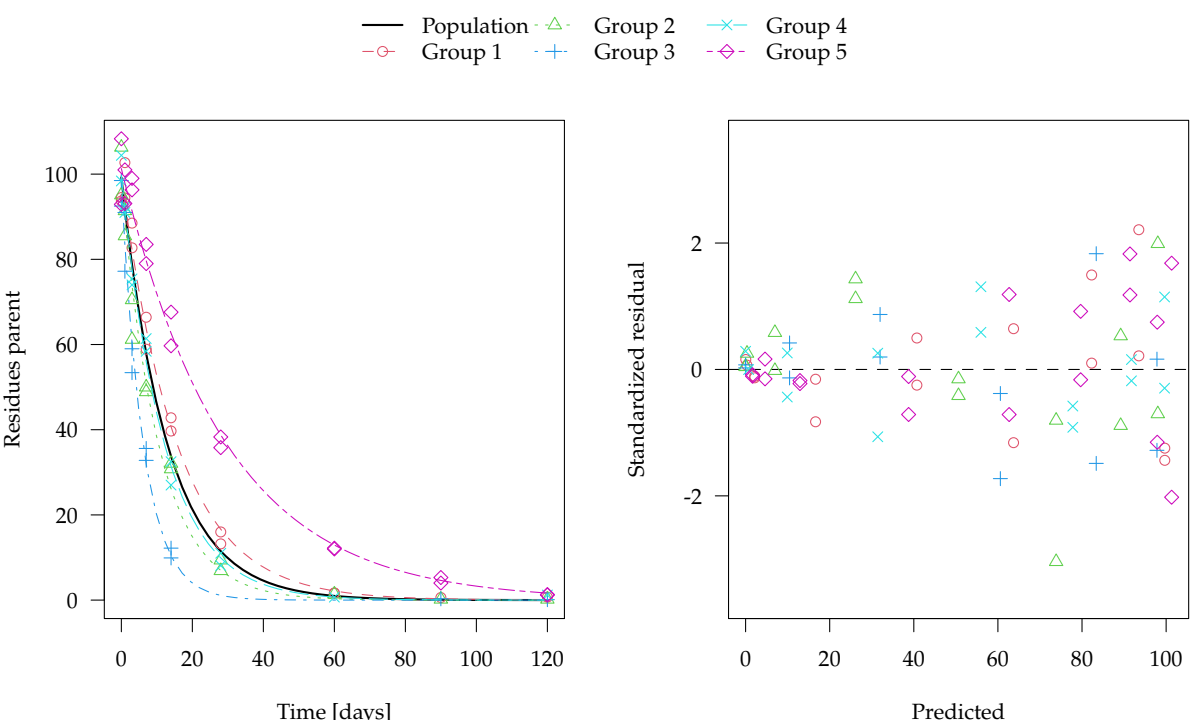

**Figure 5:** SFO fit with saemix to an example dataset with mean input half-life 15 days, constant variance

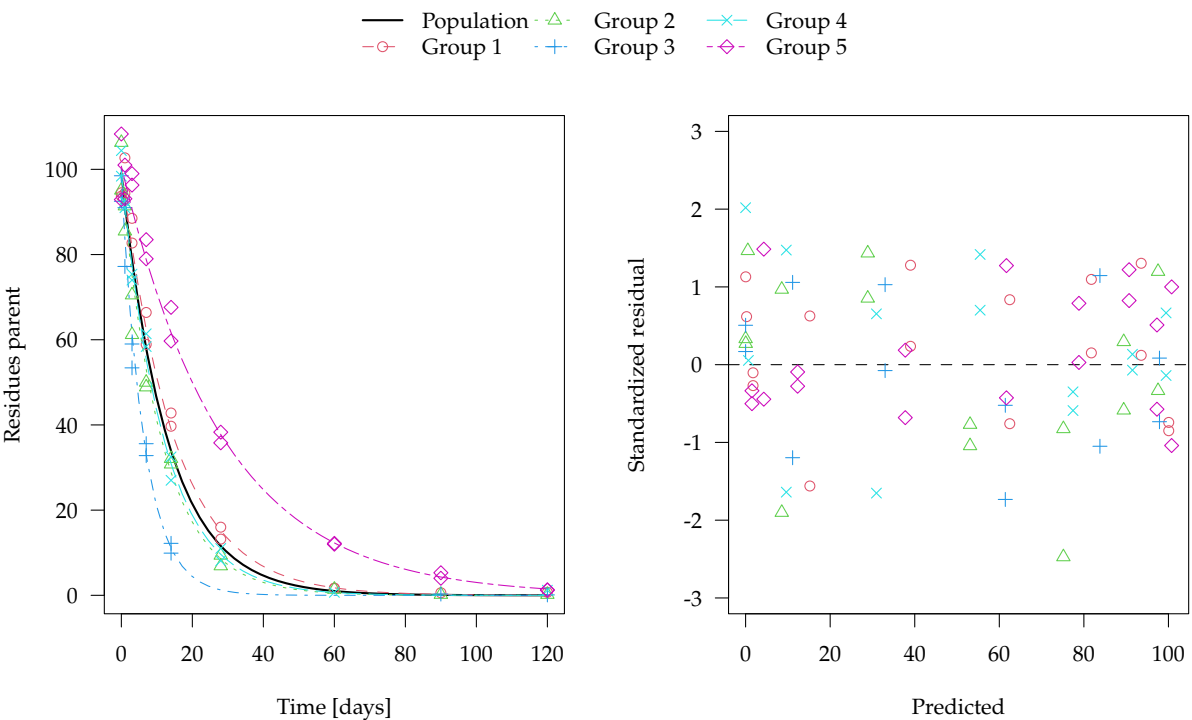

**Figure 6:** SFO fit with saemix to an example dataset with mean input half-life 15 days, two-component error model

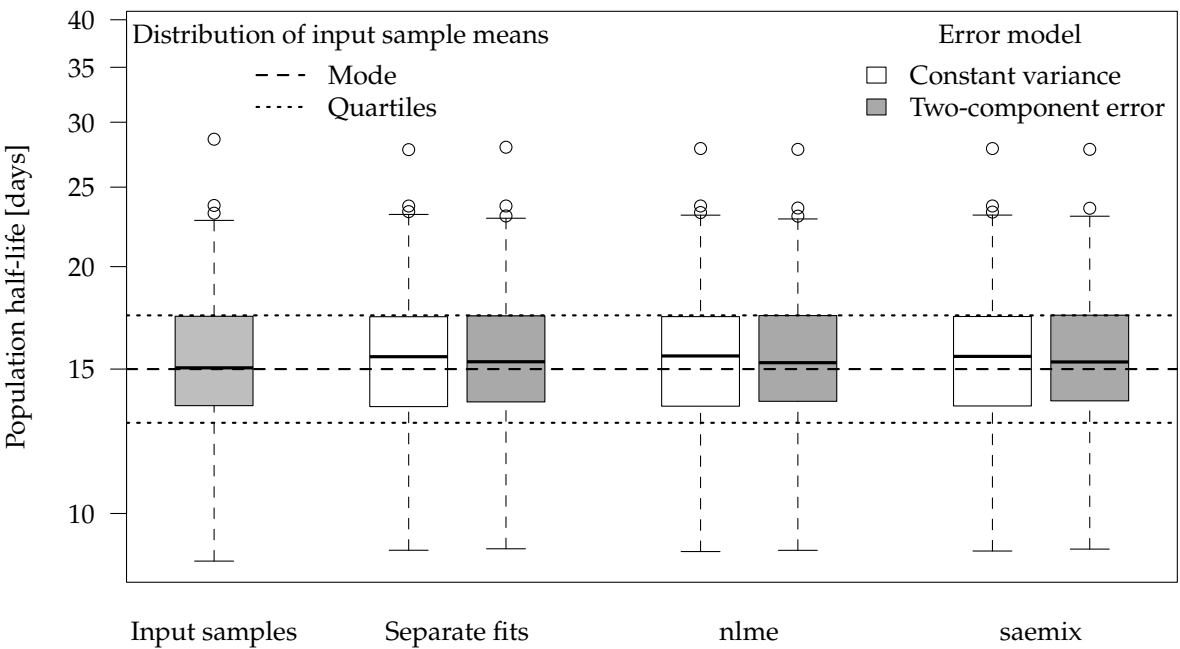

Figure 7: Boxplots of half-lives derived from 100 datasets for five groups, input 15 days

Table 3: Statistics for half-lives derived from 100 datasets with five groups, input half-life 15 days

| Input parameters    |              |              | Separate fits |        | nlme   |        | saemix |        |
|---------------------|--------------|--------------|---------------|--------|--------|--------|--------|--------|
|                     | Distribution | Sample means | const         | tc     | const  | tc     | const  | tc     |
| Number of results   |              |              | 500           | 500    | 100    | 100    | 100    | 100    |
| Fits with lower AIC |              |              | 11            | 489    | 0      | 100    | 1      | 99     |
| Minimum             |              | 8.749        | 9.019         | 9.056  | 8.986  | 9.017  | 9.000  | 9.048  |
| 25th percentile     | 12.90        | 13.555       | 13.524        | 13.691 | 13.549 | 13.705 | 13.566 | 13.724 |
| Median              | 15.00        | 15.053       | 15.530        | 15.312 | 15.563 | 15.272 | 15.544 | 15.303 |
| 75th percentile     | 17.44        | 17.358       | 17.326        | 17.382 | 17.336 | 17.416 | 17.346 | 17.438 |
| Maximum             |              | 28.600       | 27.775        | 27.964 | 27.863 | 27.796 | 27.860 | 27.801 |

**Geometric mean half-life of 120 days**

Example plots for separate fits in one of the synthetic datasets are shown in Figures 8 and 9. Corresponding example plots of the simultaneous evaluation of this dataset using saemix are shown in Figures 12 and 13.

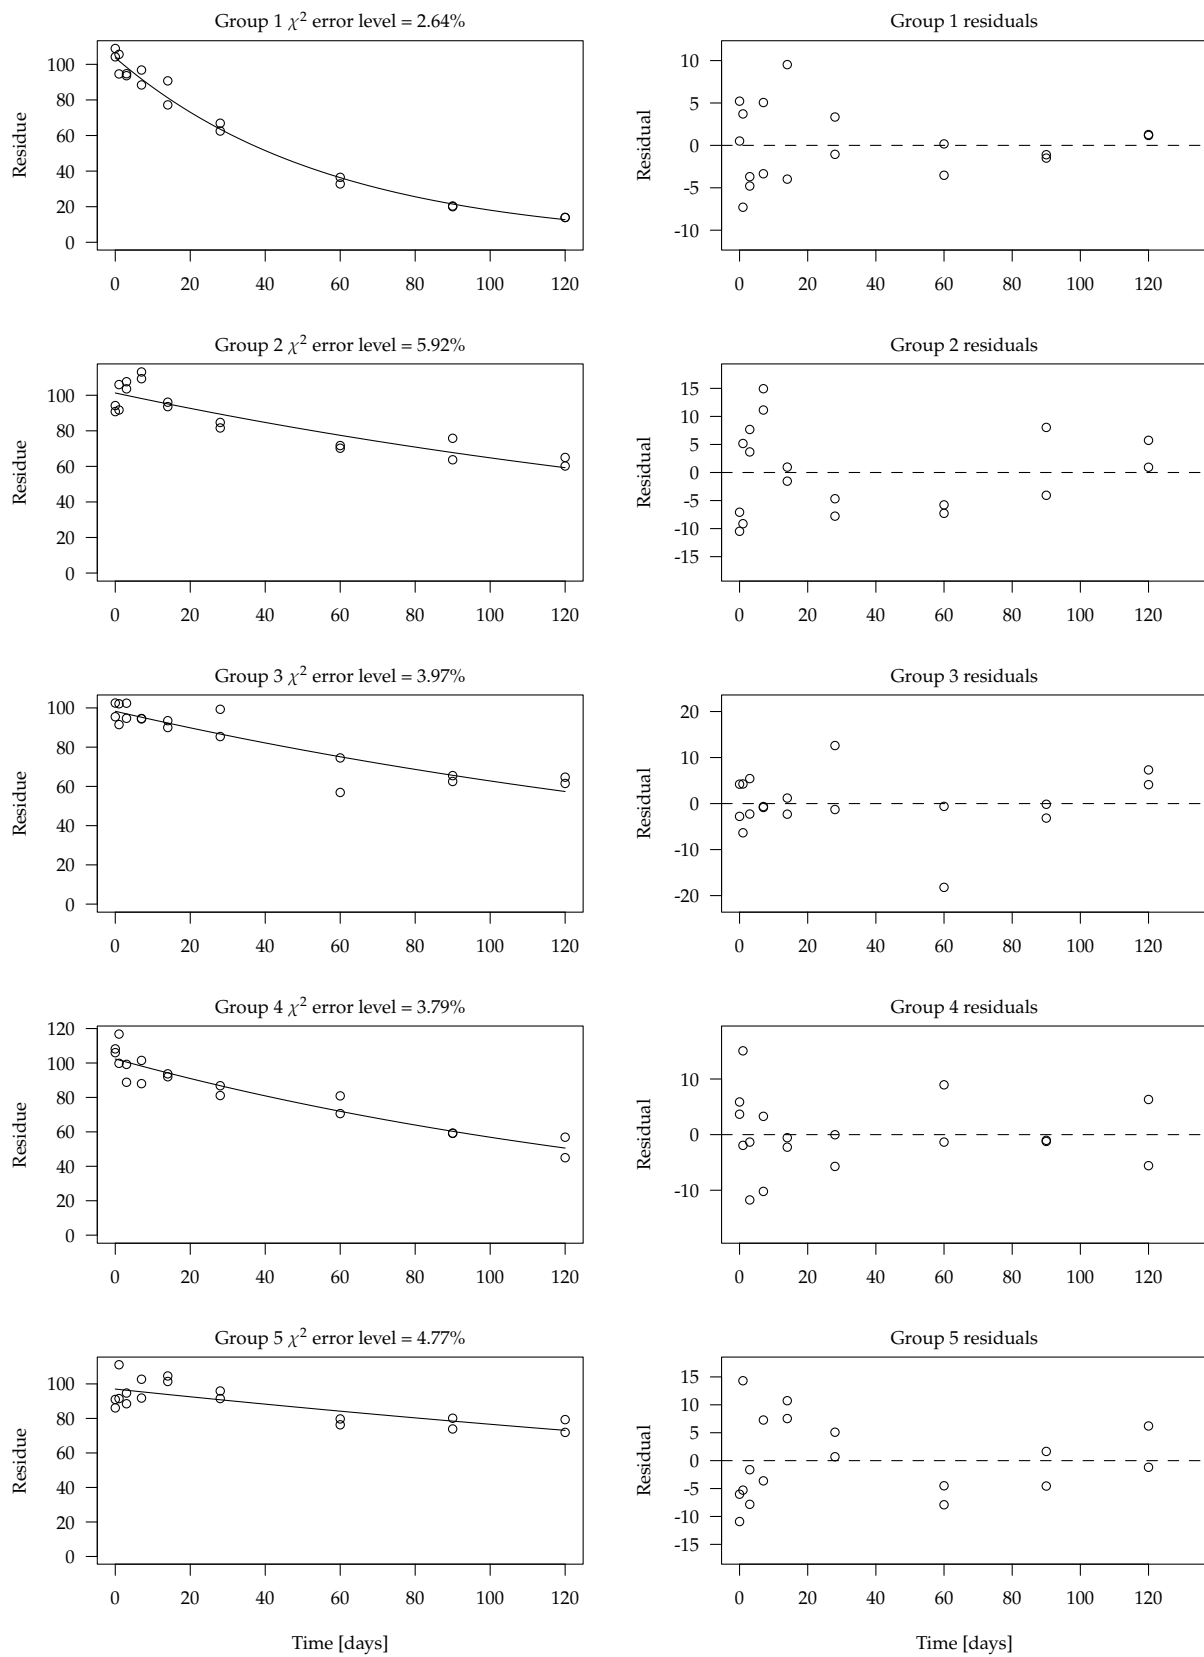

**Figure 8:** Separate fits to an example dataset with mean input half-life 120 days, constant variance error model

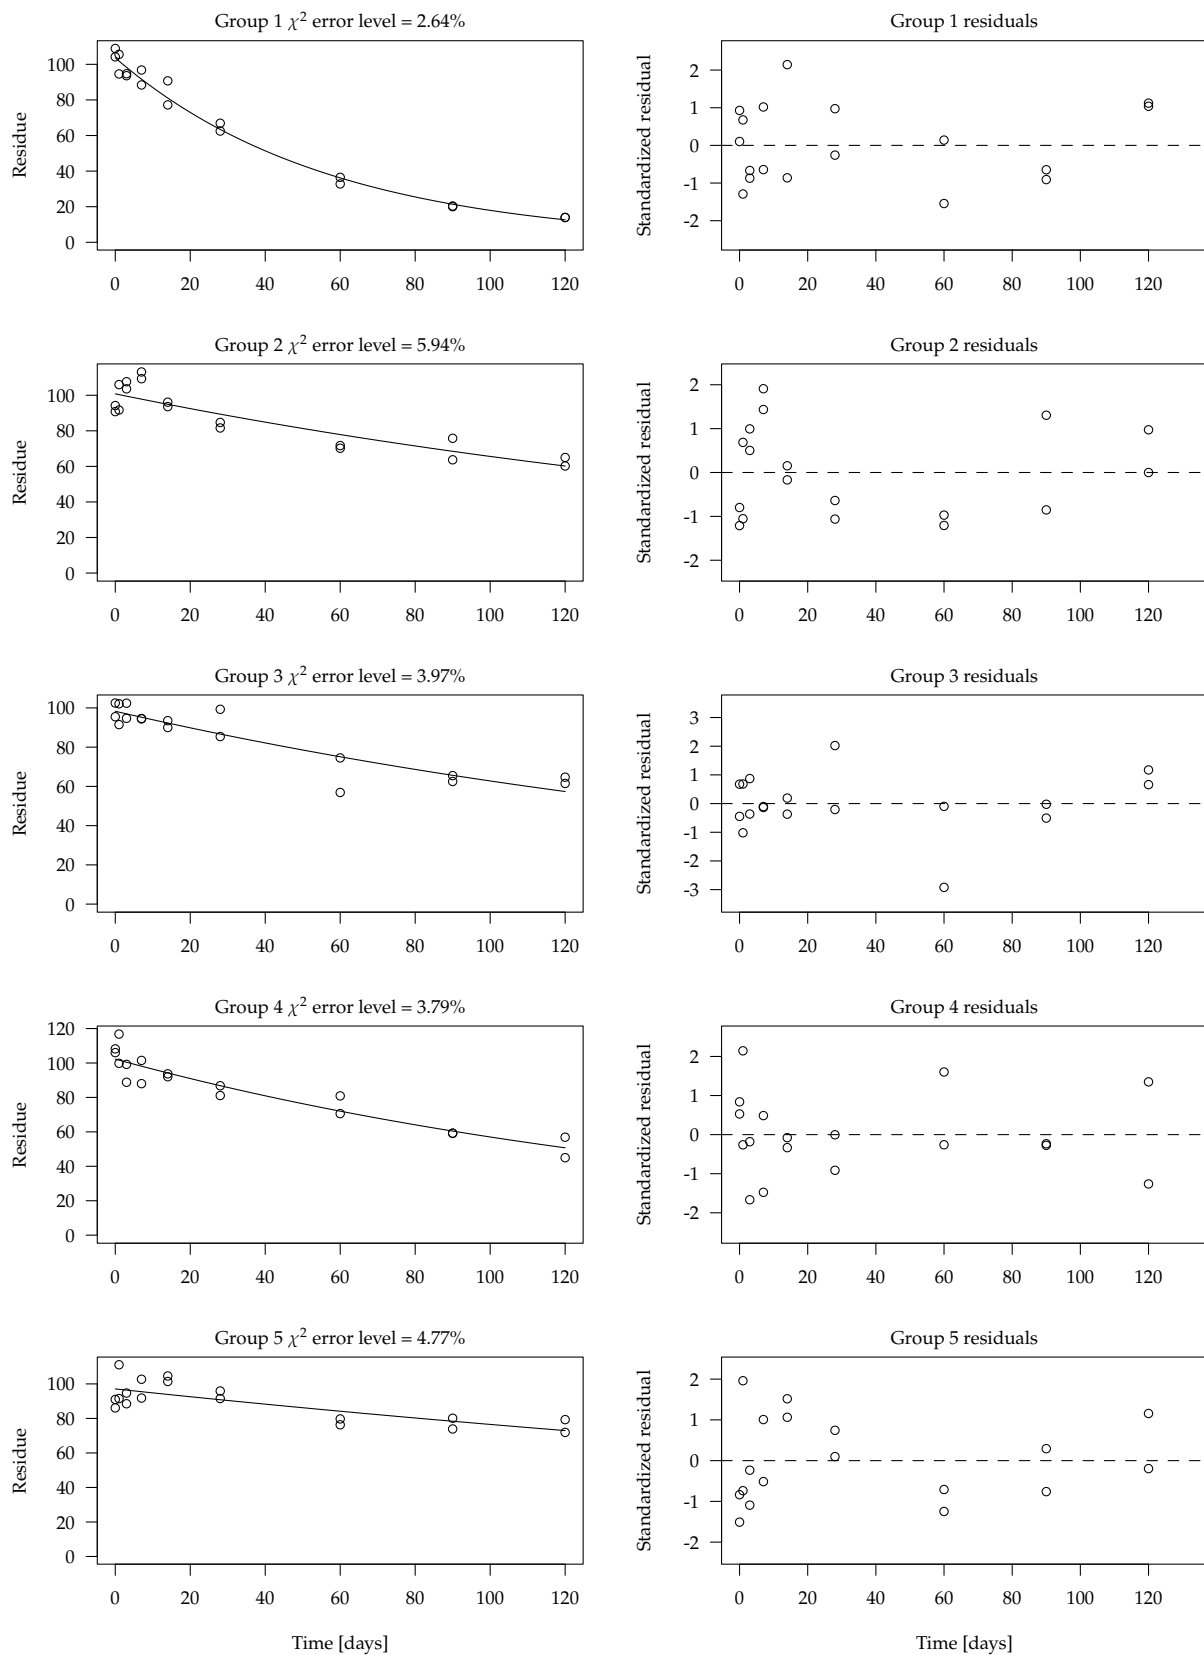

**Figure 9:** Separate fits to an example dataset with mean input half-life 120 days, two-component error model

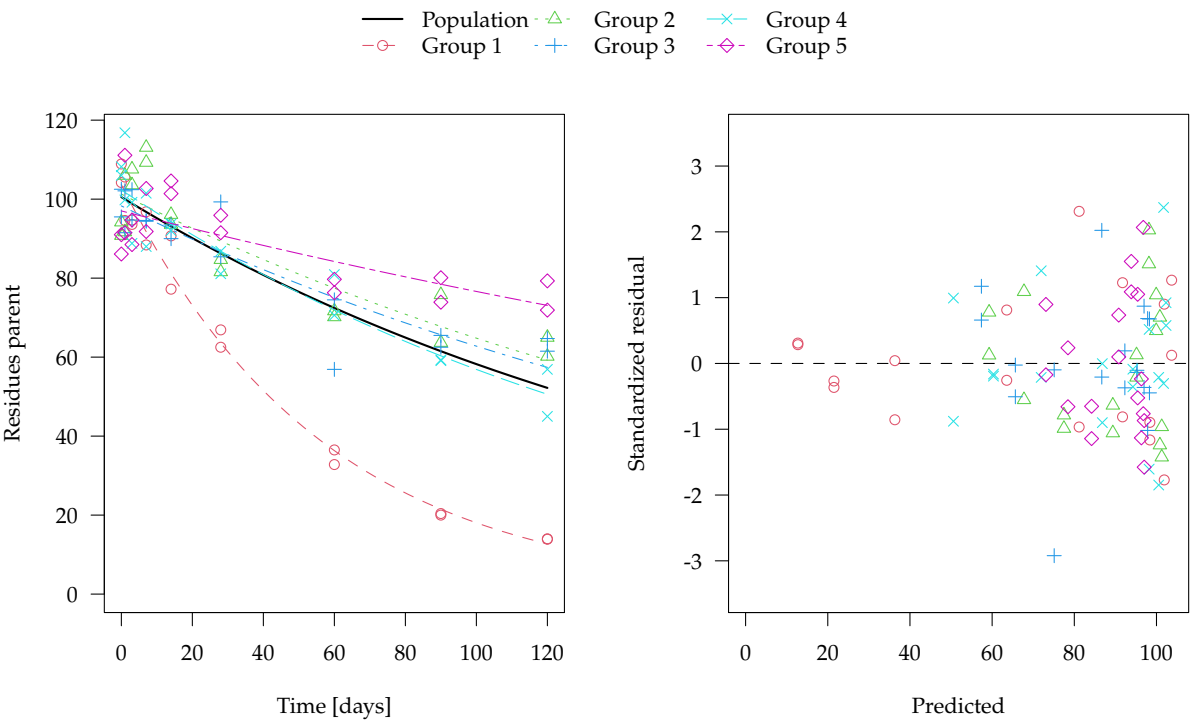

**Figure 10:** Combined plot of separate fits to an example dataset with mean input half-life 120 days, constant variance error model

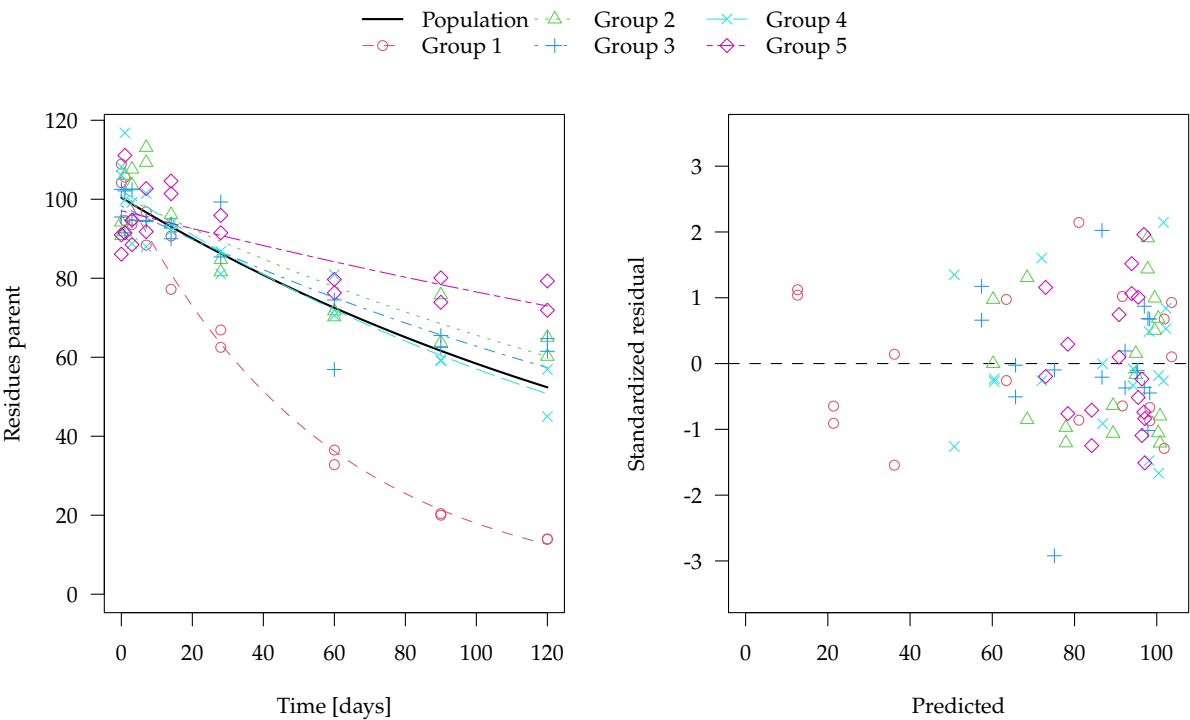

**Figure 11:** Combined plot of separate fits to an example dataset with mean input half-life 120 days, two-component error model

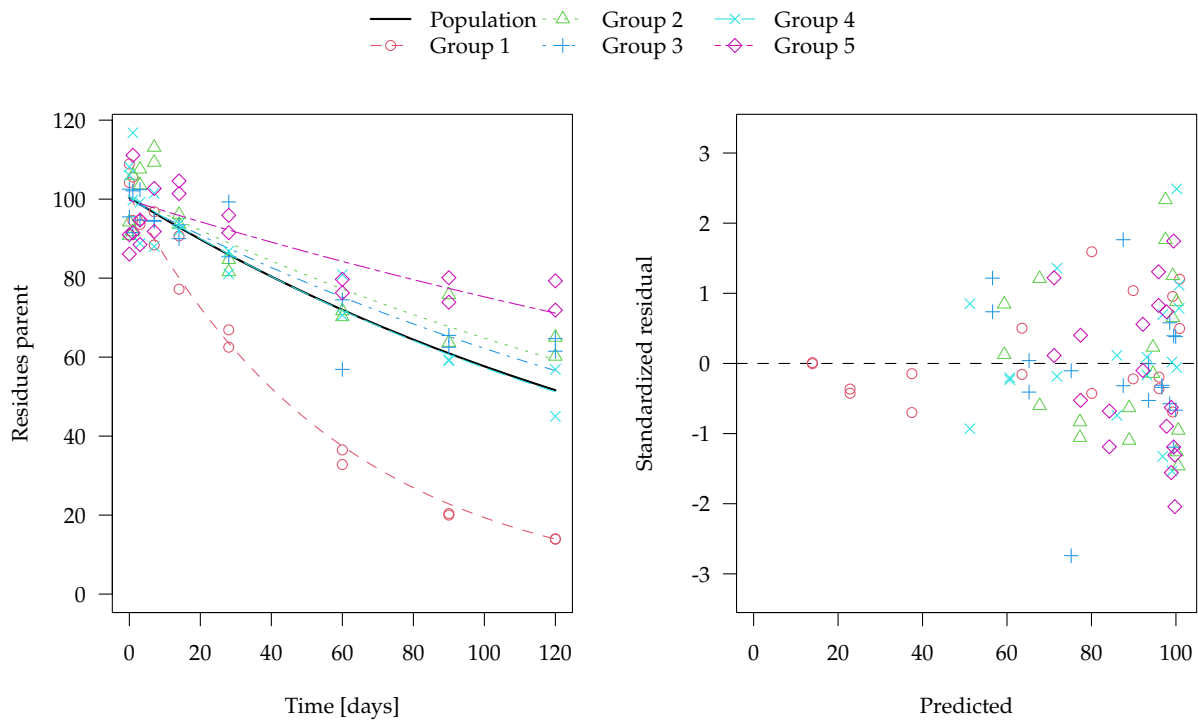

**Figure 12:** SFO fit with saemix to an example dataset with mean input half-life 120 days, constant variance

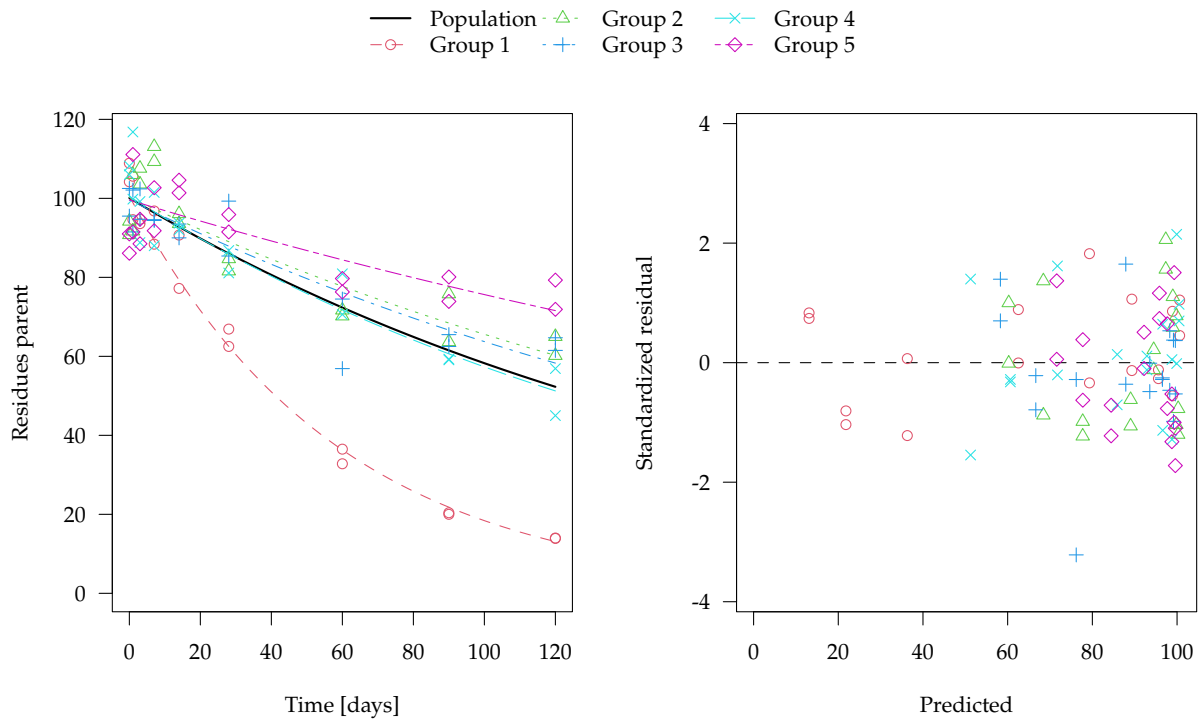

**Figure 13:** SFO fit with saemix to an example dataset with mean input half-life 120 days, two-component error model



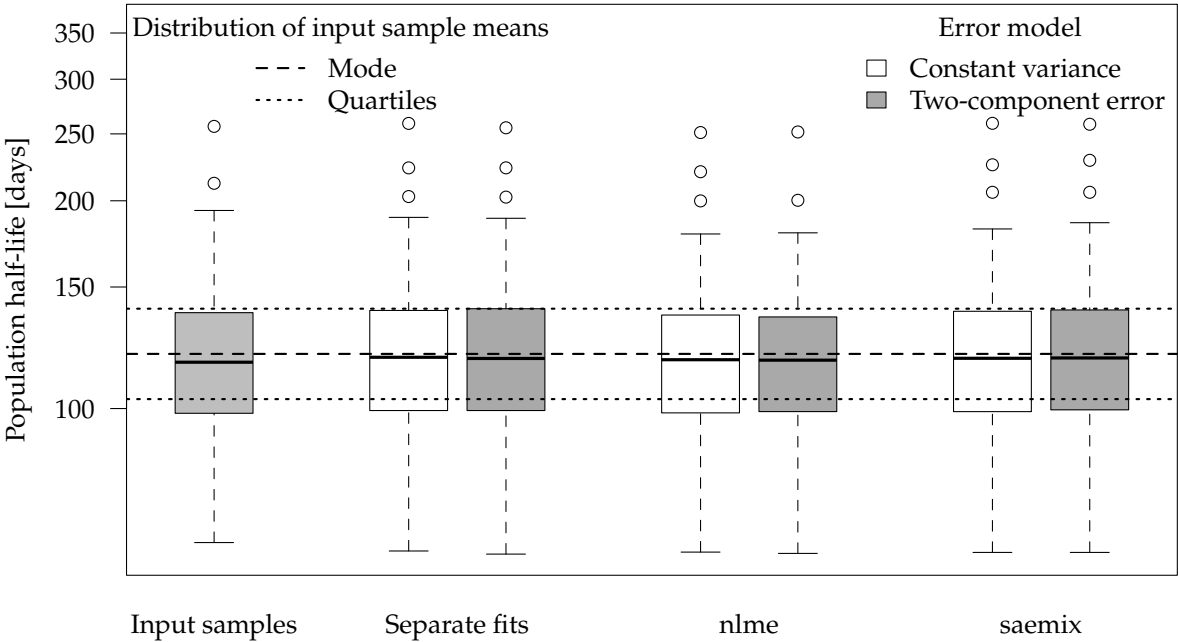

Figure 14: Boxplots of half-lives derived from 100 datasets for five groups, input 120 days

Table 4: Statistics for half-lives derived from 100 datasets with five groups, input half-life 120 days

| Input parameters    |              |              | Separate fits |        | nlme   |        | saemix |        |
|---------------------|--------------|--------------|---------------|--------|--------|--------|--------|--------|
|                     | Distribution | Sample means | const         | tc     | const  | tc     | const  | tc     |
| Number of results   |              |              | 500           | 500    | 100    | 99     | 100    | 100    |
| Fits with lower AIC |              |              | 254           | 246    | 7      | 92     | 14     | 86     |
| Minimum             |              | 63.95        | 62.18         | 61.53  | 61.95  | 61.68  | 61.88  | 61.88  |
| 25th percentile     | 103.2        | 98.54        | 99.70         | 99.75  | 98.95  | 98.99  | 99.37  | 100.04 |
| Median              | 120.0        | 116.71       | 118.66        | 118.18 | 117.69 | 117.51 | 118.26 | 118.38 |
| 75th percentile     | 139.5        | 137.48       | 138.35        | 139.34 | 136.57 | 135.75 | 137.99 | 138.57 |
| Maximum             |              | 256.33       | 258.88        | 255.12 | 251.11 | 251.59 | 258.96 | 258.15 |

**Geometric mean half-life of 500 days**

Example plots for separate fits in one of the synthetic datasets are shown in Figures 15 and 16. Corresponding example plots of the simultaneous evaluation of this dataset using saemix are shown in Figures 19 and 20.

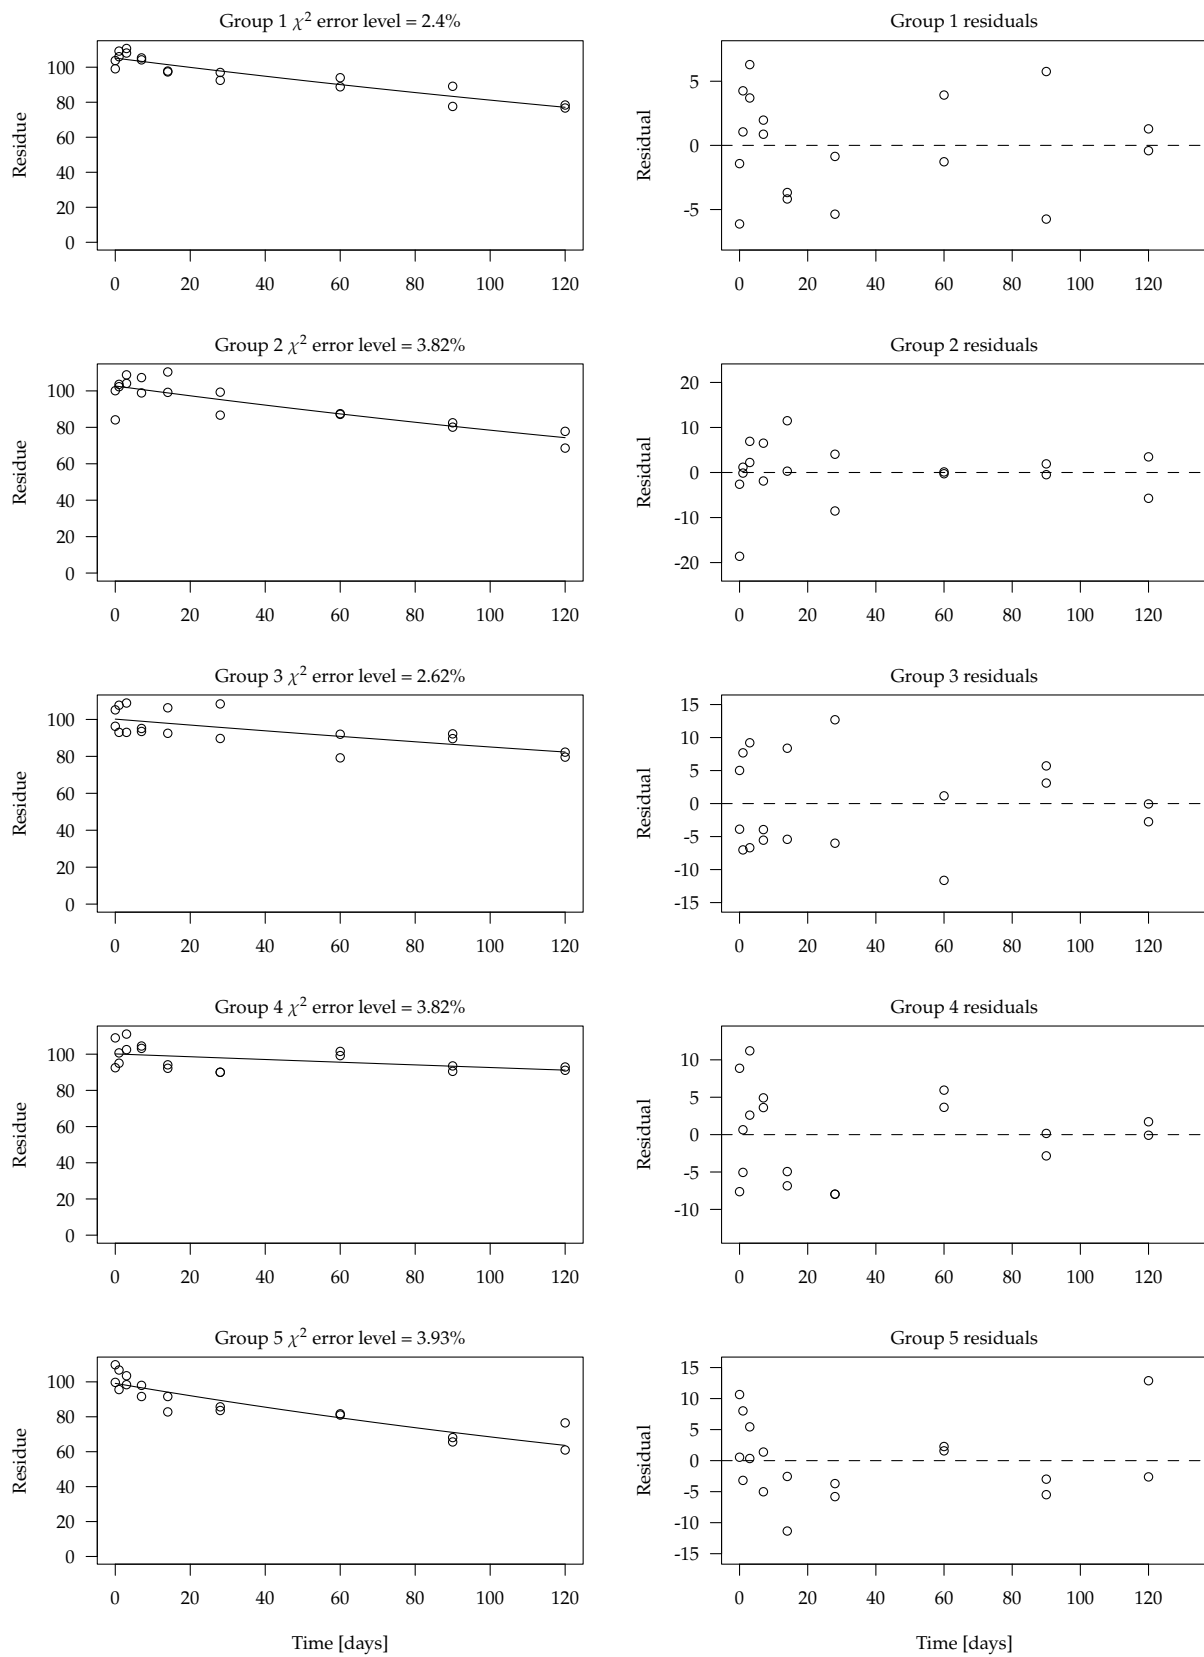

**Figure 15:** Separate fits to an example dataset with mean input half-life 500 days, constant variance error model

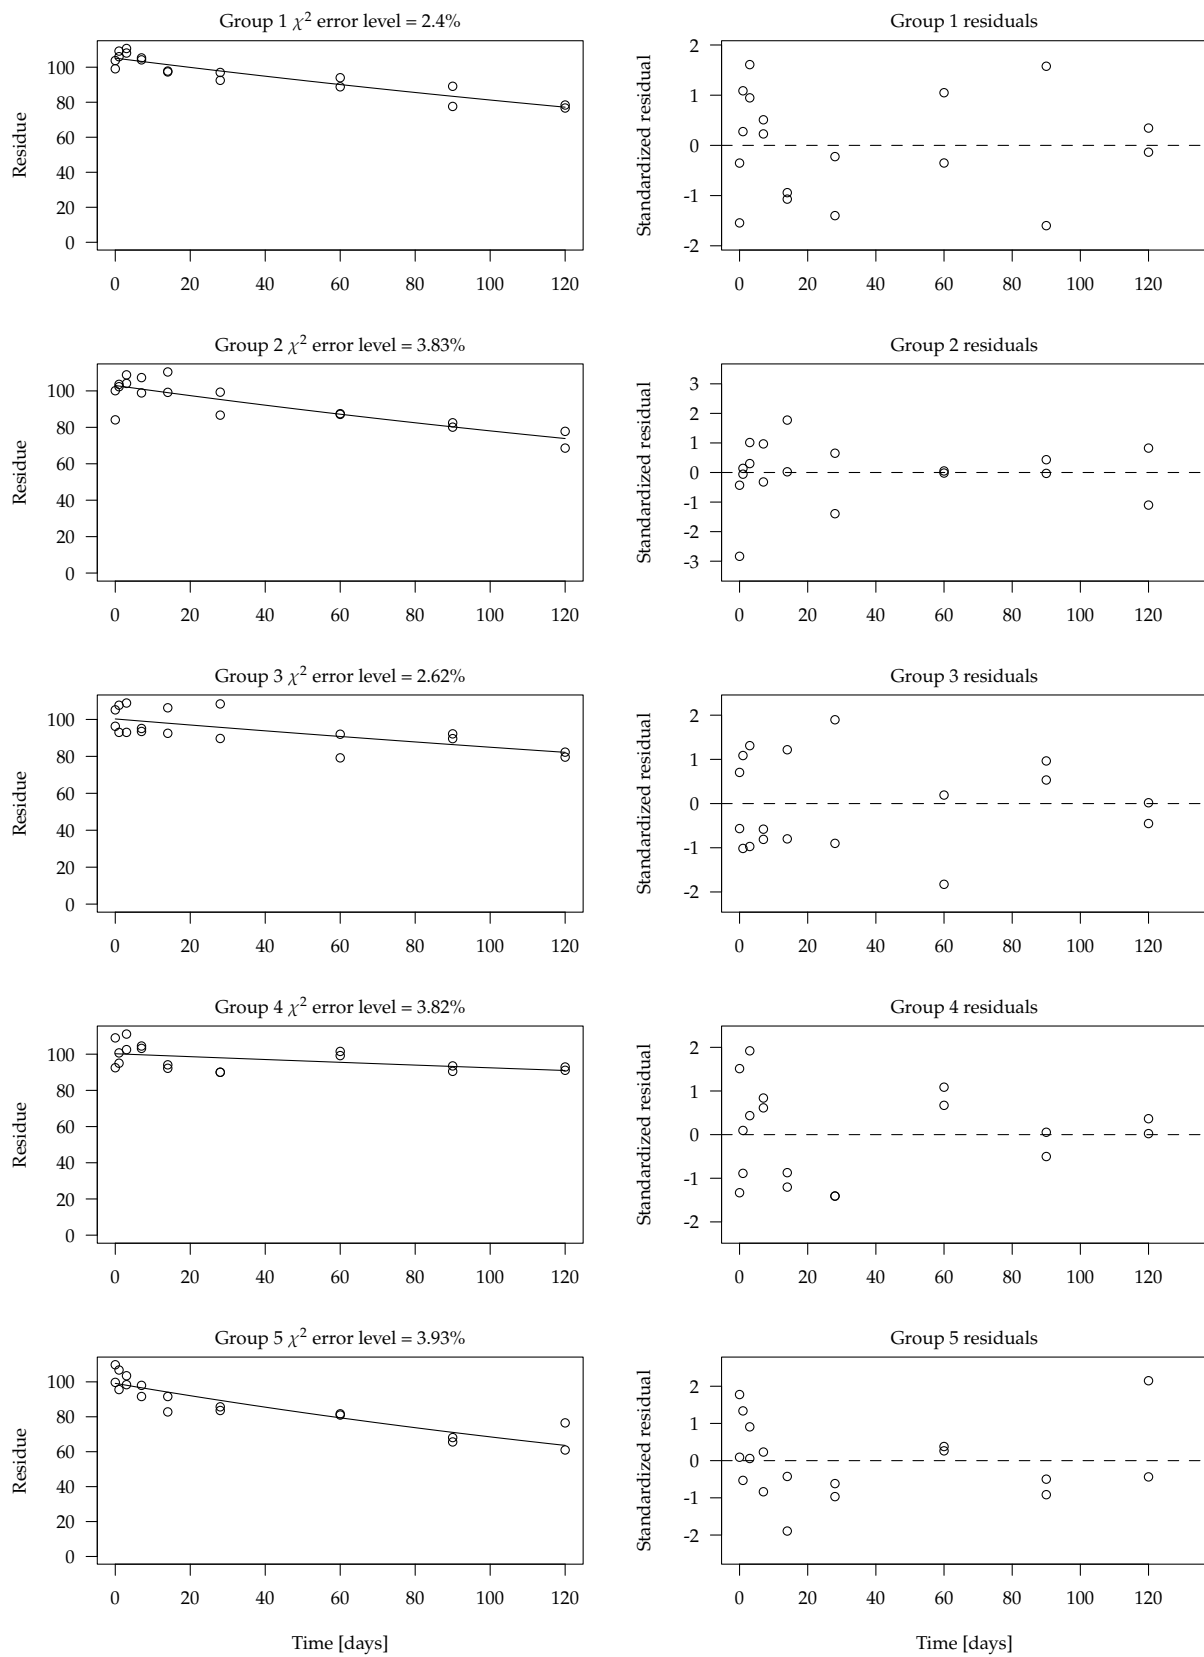

**Figure 16:** Separate fits to an example dataset with mean input half-life 500 days, two-component error model

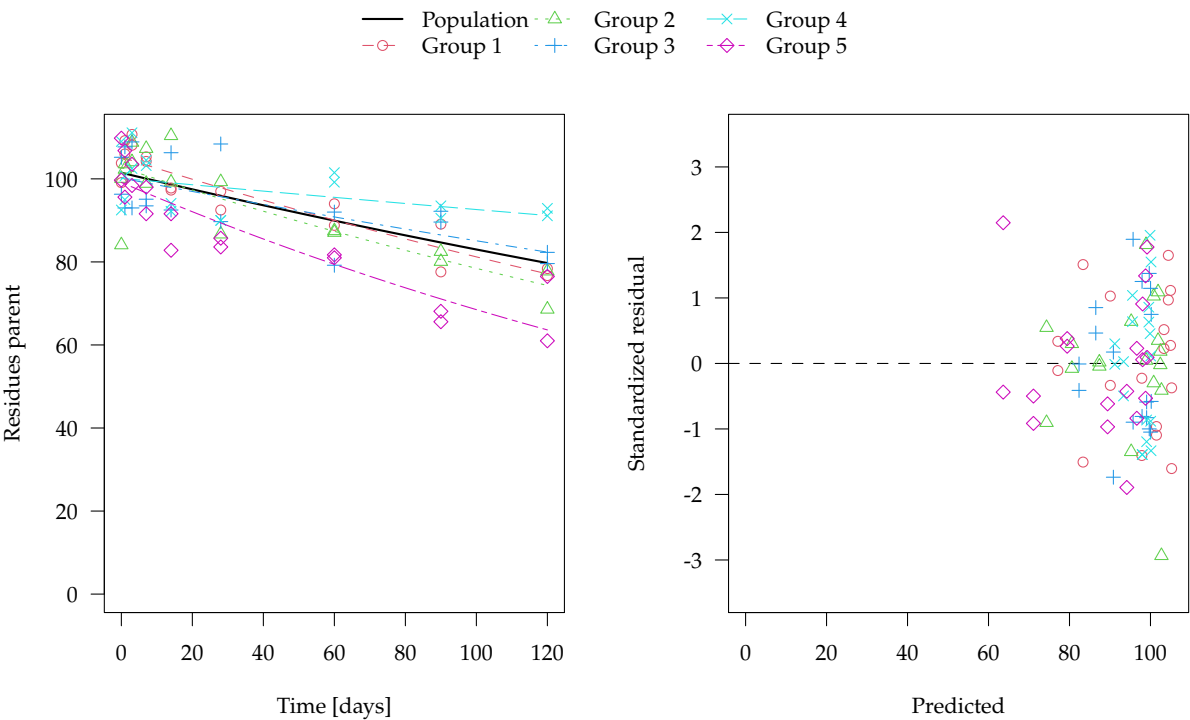

**Figure 17:** Combined plot of separate fits to an example dataset with mean input half-life 500 days, constant variance error model

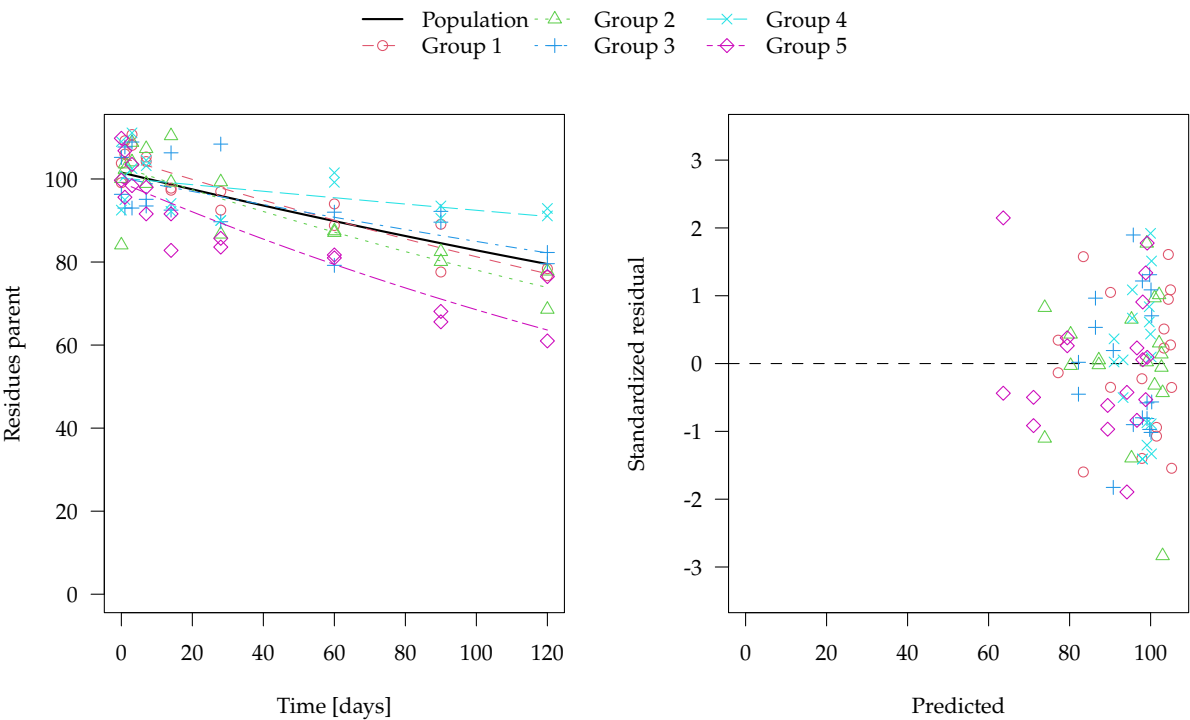

**Figure 18:** Combined plot of separate fits to an example dataset with mean input half-life 500 days, two-component error model

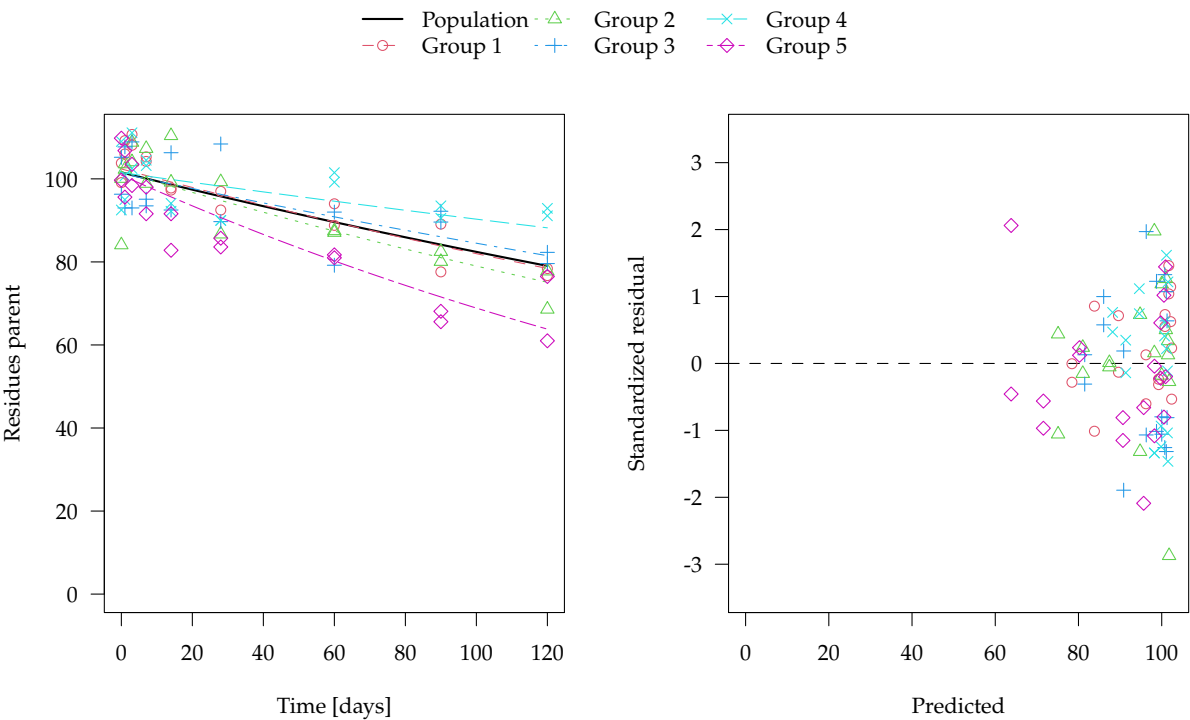

Figure 19: SFO fit with saemix to an example dataset with mean input half-life 500 days, constant variance

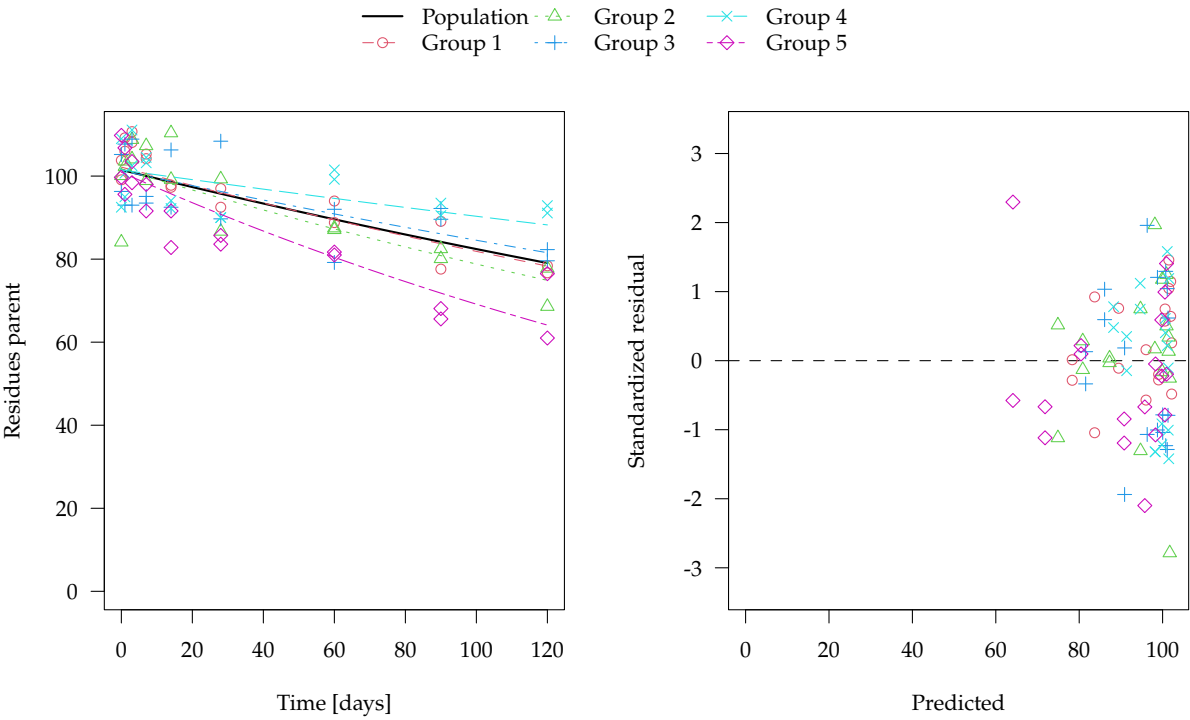

Figure 20: SFO fit with saemix to an example dataset with mean input half-life 500 days, two-component error model

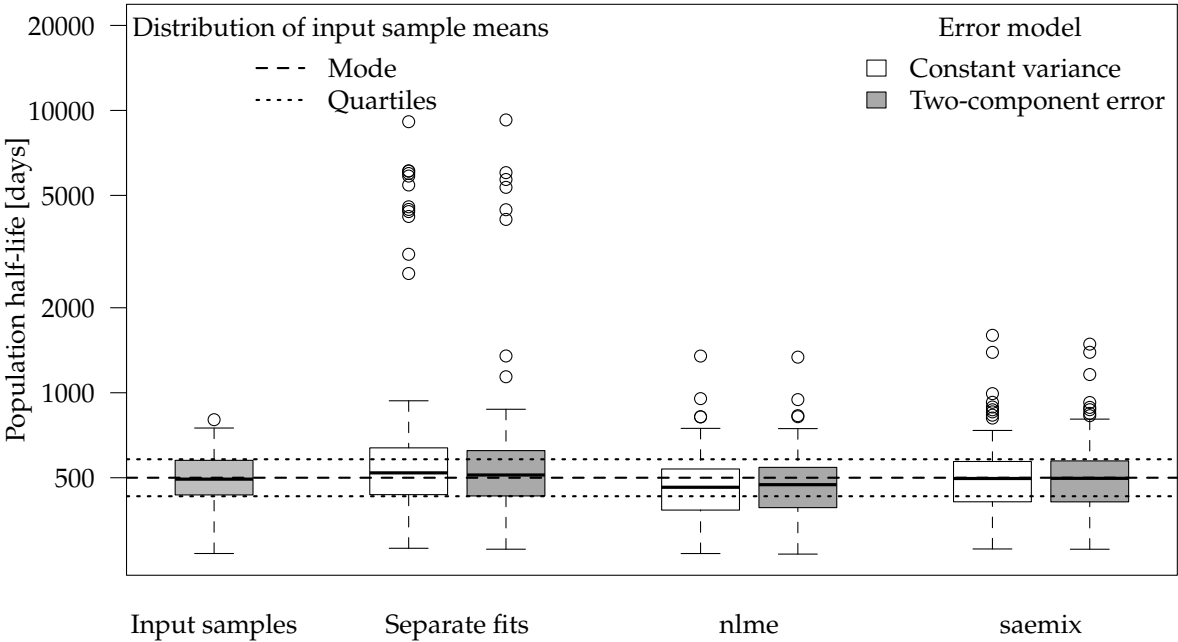

Figure 21: Boxplots of half-lives derived from 100 datasets for five groups, input 500 days

Table 5: Statistics for half-lives derived from 100 datasets with five groups, input half-life 500 days

| Input parameters    |              |              | Separate fits |         | nlme   |        | saemix |        |
|---------------------|--------------|--------------|---------------|---------|--------|--------|--------|--------|
|                     | Distribution | Sample means | const         | tc      | const  | tc     | const  | tc     |
| Number of results   |              |              | 500           | 500     | 98     | 85     | 100    | 100    |
| Fits with lower AIC |              |              | 484           | 16      | 69     | 16     | 78     | 22     |
| Minimum             |              | 269.5        | 281.3         | 279.2   | 269.4  | 268.2  | 279.7  | 279.1  |
| 25th percentile     | 430.0        | 436.3        | 438.3         | 431.5   | 384.6  | 391.8  | 411.6  | 410.8  |
| Median              | 500.0        | 494.4        | 520.3         | 511.3   | 462.6  | 472.6  | 496.9  | 497.5  |
| 75th percentile     | 581.4        | 576.2        | 636.9         | 622.6   | 536.8  | 544.2  | 570.7  | 573.6  |
| Maximum             |              | 802.6        | 76701.3       | 42666.4 | 1349.0 | 1337.0 | 1597.3 | 1486.4 |

**Geometric mean half-life of 800 days**

Example plots for separate fits in one of the five synthetic datasets are shown in Figures 22 and 23. Corresponding example plots of the simultaneous evaluation of this dataset using saemix are shown in Figures 26 and 27. A direct comparison of separate and simultaneous evaluations is shown in Figure 28.



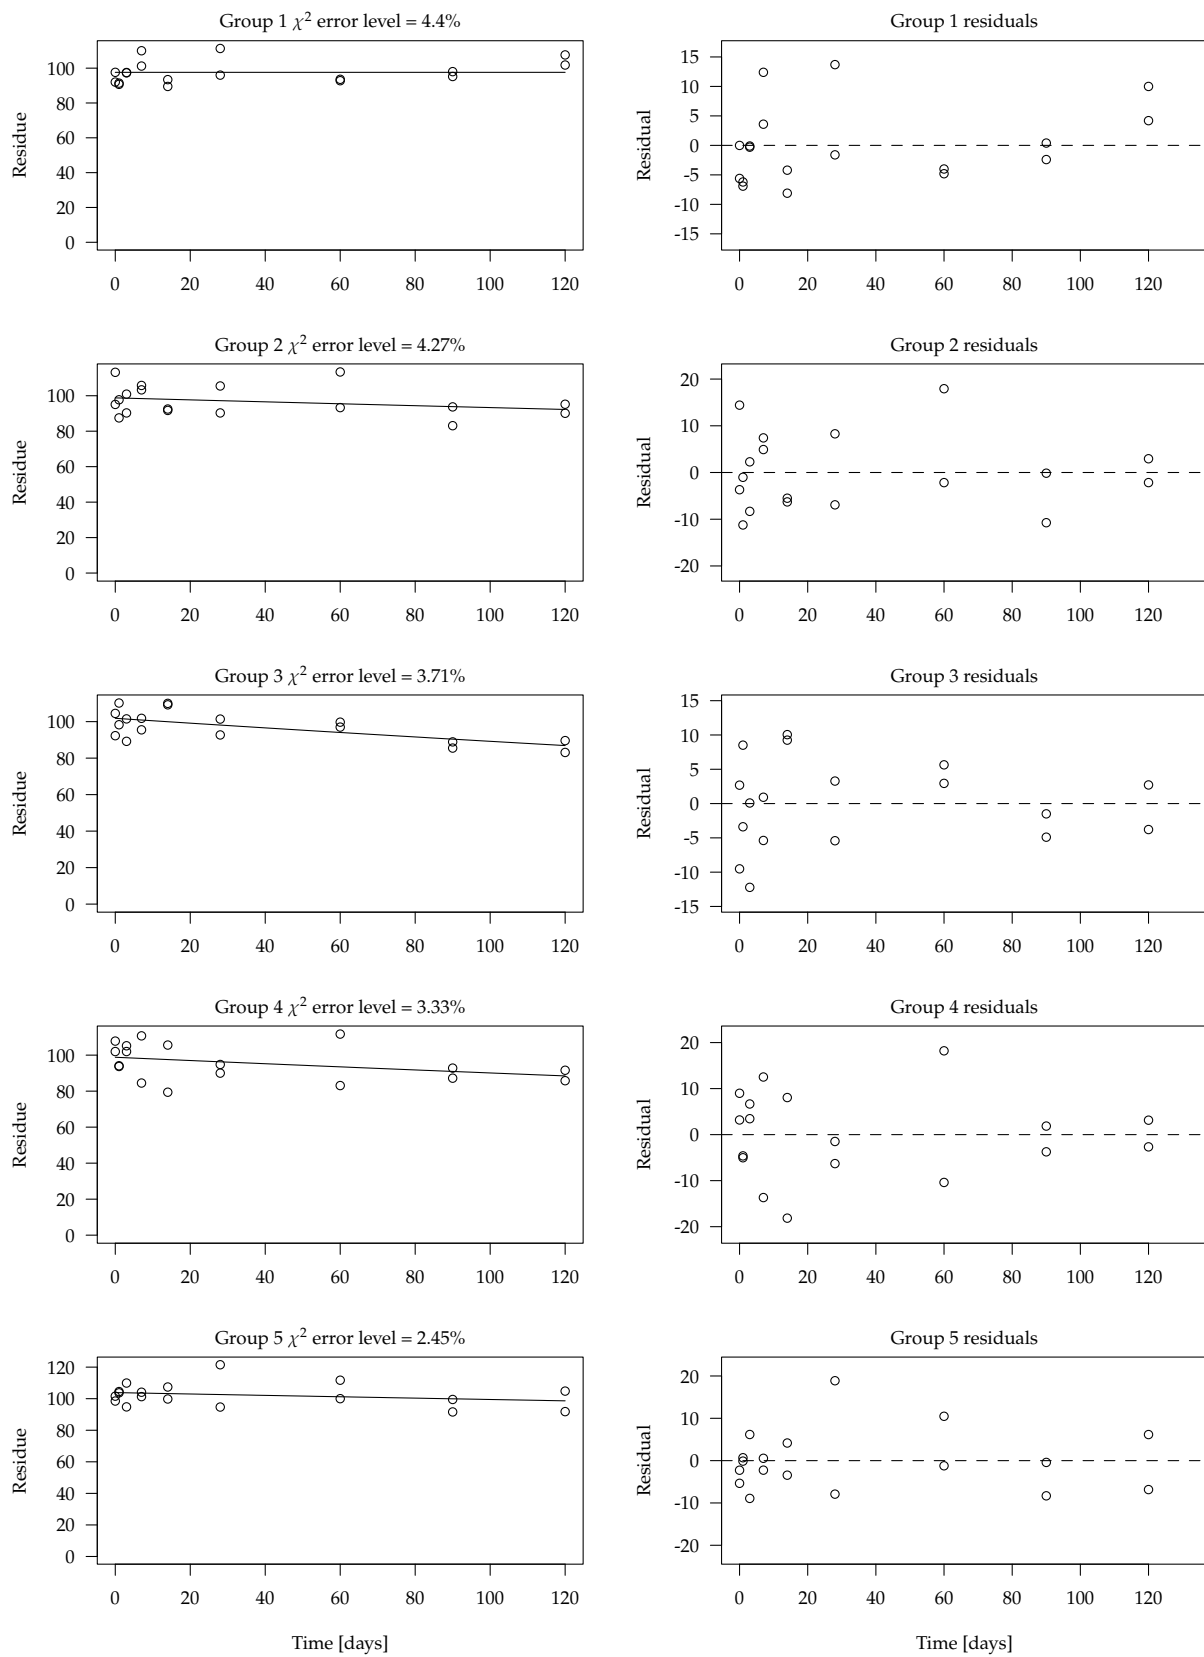

**Figure 22:** Separate fits to an example dataset with mean input half-life 800 days, constant variance error model

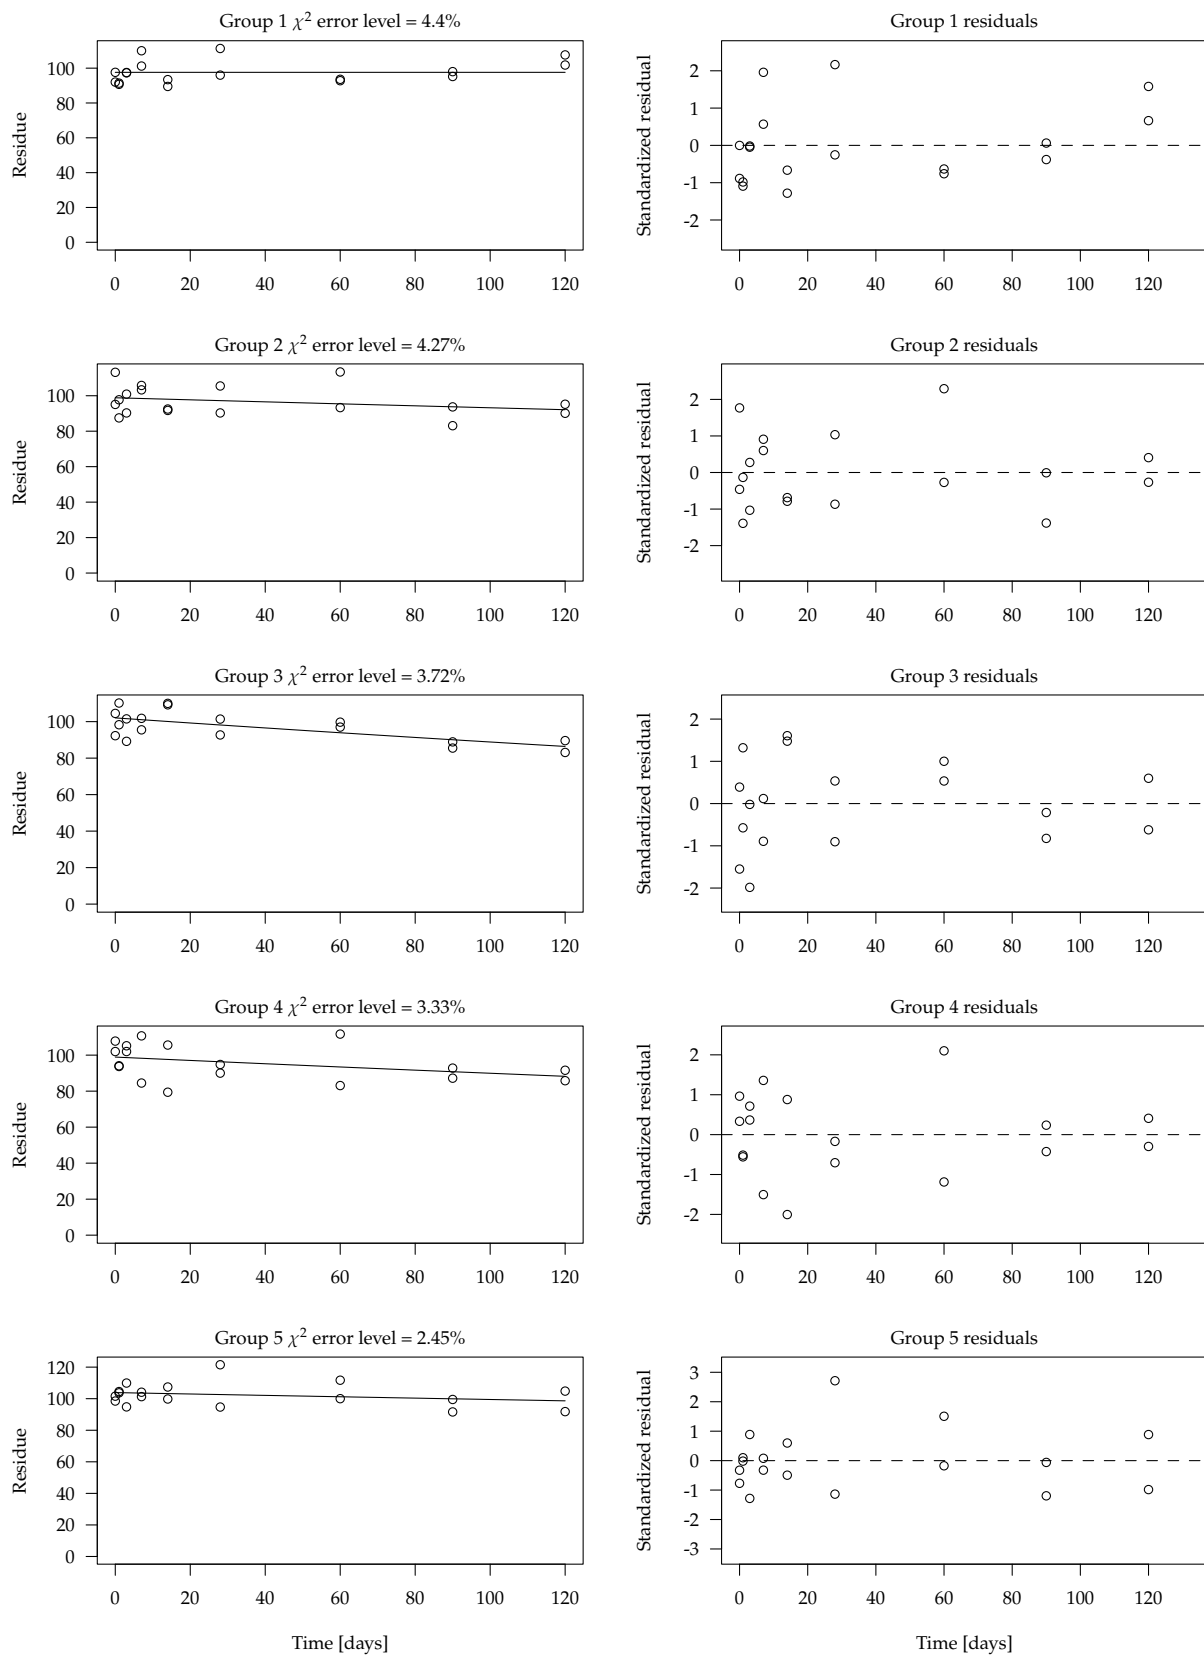

**Figure 23:** Separate fits to an example dataset with mean input half-life 800 days, two-component error model

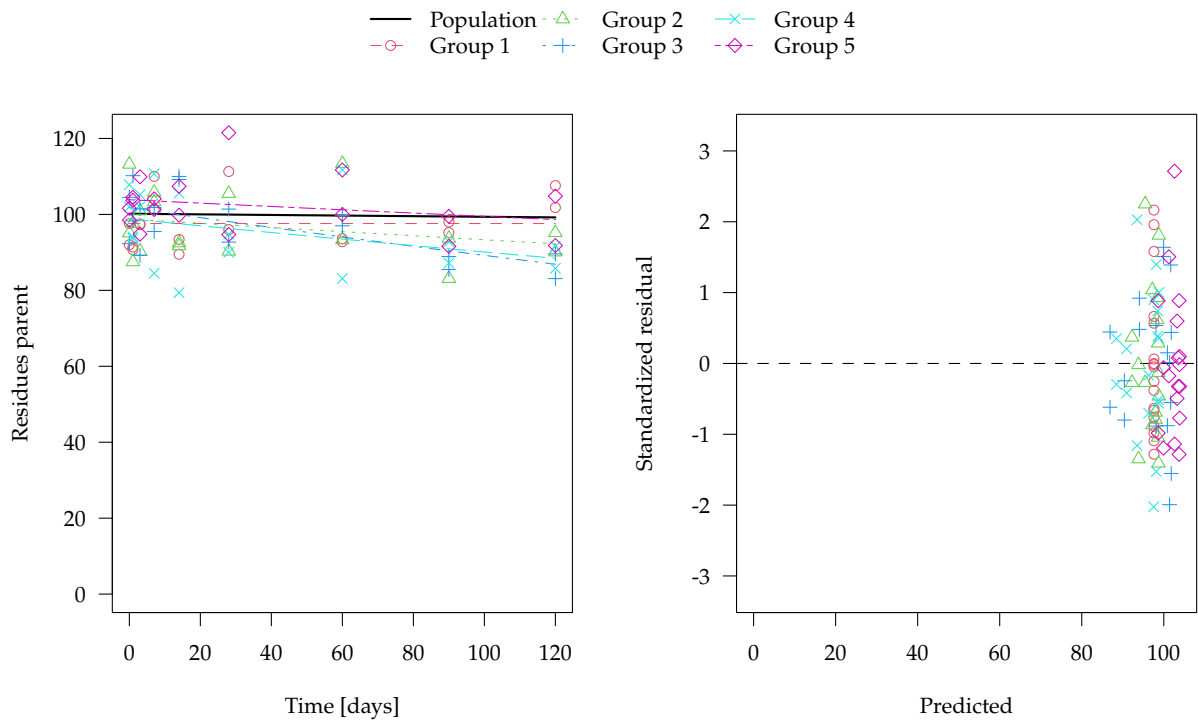

**Figure 24:** Combined plot of separate fits to an example dataset with mean input half-life 800 days, constant variance error model

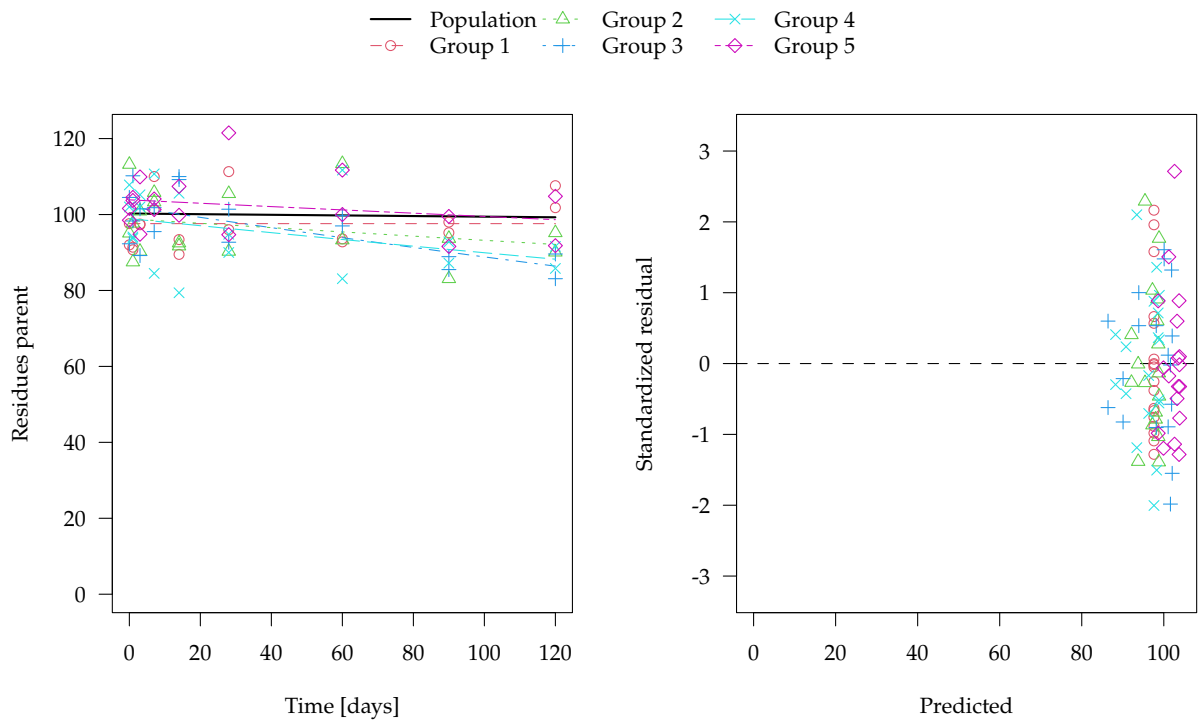

**Figure 25:** Combined plot of separate fits to an example dataset with mean input half-life 800 days, two-component error model

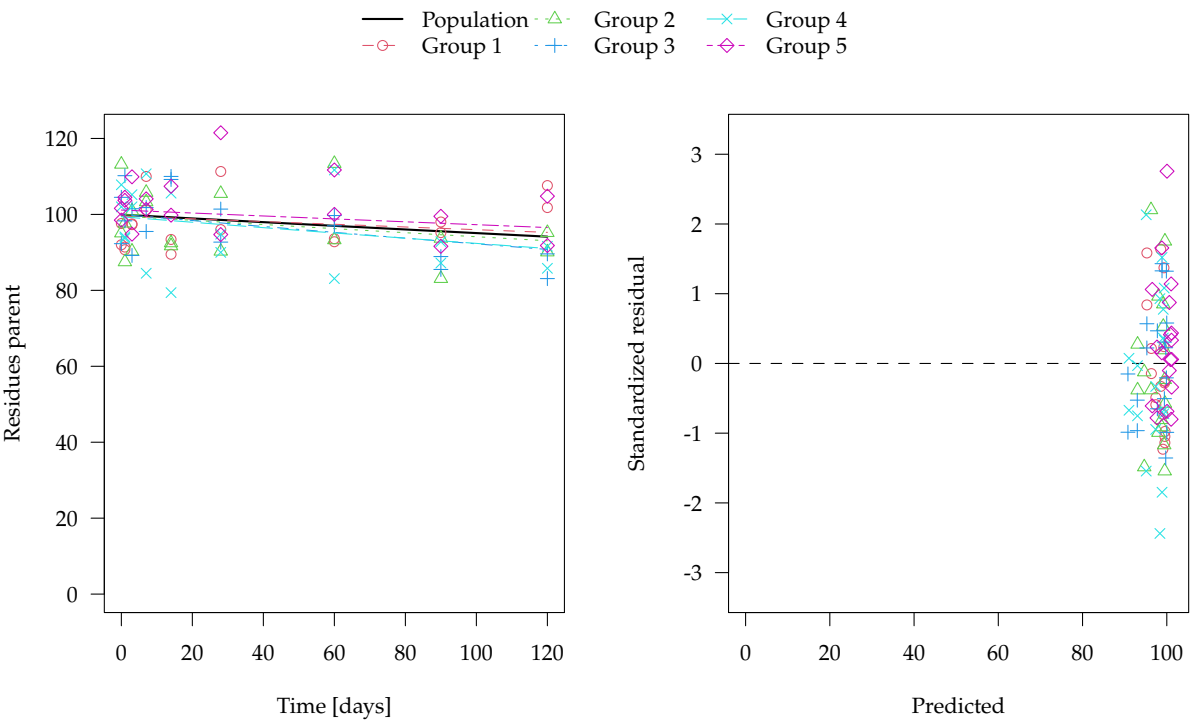

**Figure 26:** SFO fit with saemix to an example dataset with mean input half-life 800 days, constant variance

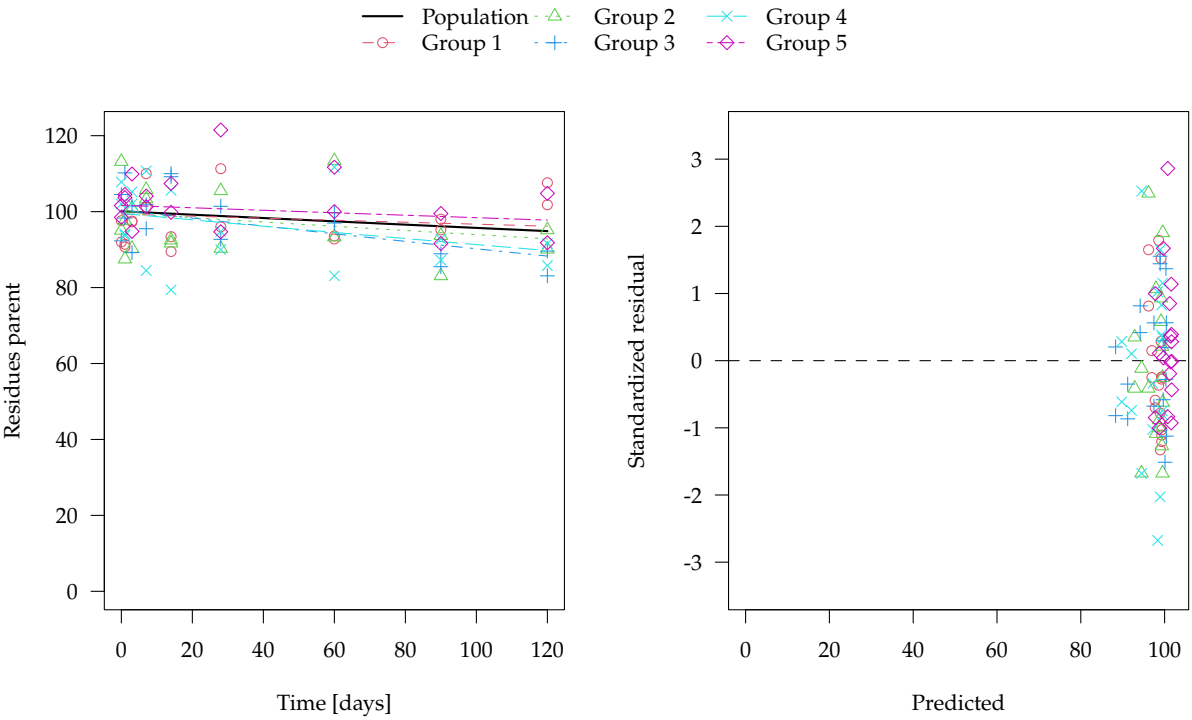

**Figure 27:** SFO fit with saemix to an example dataset with mean input half-life 800 days, two-component error model

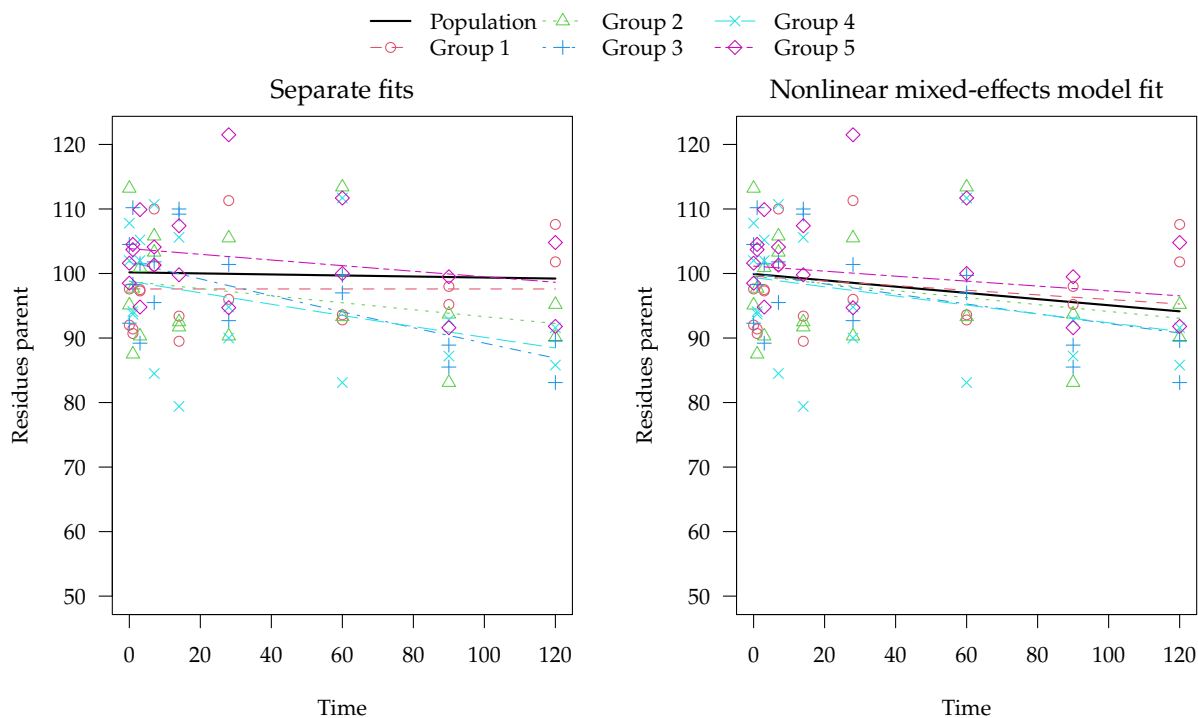

**Figure 28:** SFO fits with mkin and saemix to an example dataset with mean input half-life 800 days, constant variance

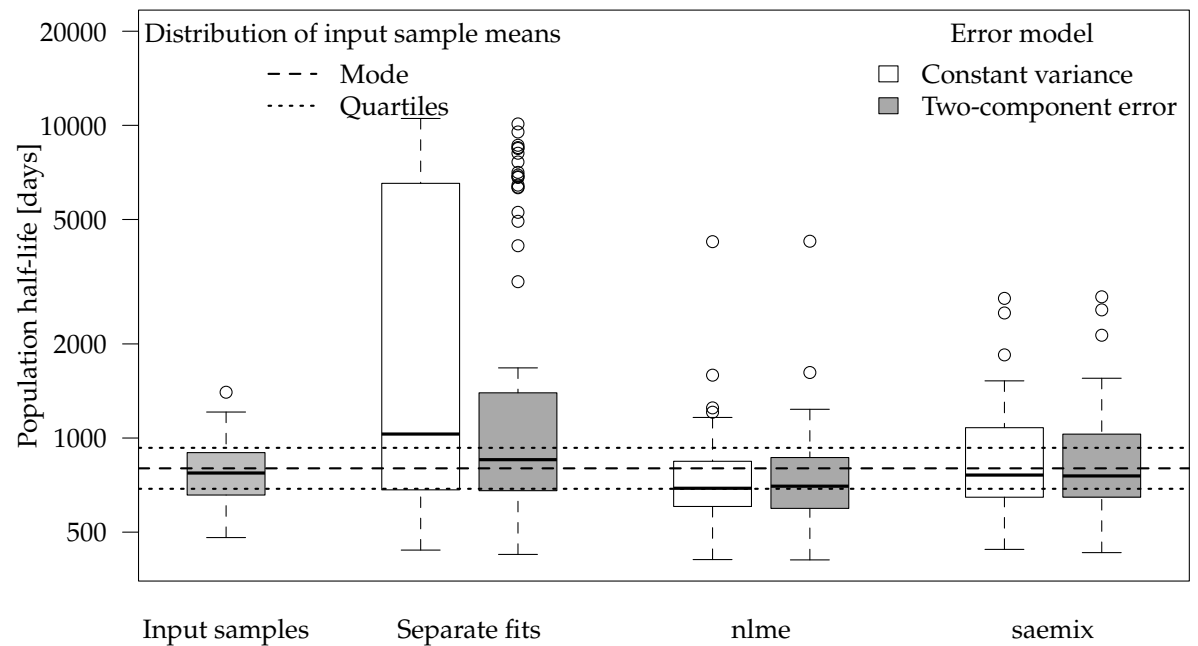

**Figure 29:** Boxplots for the half-lives derived from 100 datasets for five groups, half-life 800 days

**Table 6:** Statistics for half-lives derived from 100 datasets with five groups, input half-life 800 days

| Input parameters    |              |              | Separate fits |          | nlme   |        | saemix  |        |
|---------------------|--------------|--------------|---------------|----------|--------|--------|---------|--------|
|                     | Distribution | Sample means | const         | tc       | const  | tc     | const   | tc     |
| Number of results   |              |              | 500           | 500      | 94     | 88     | 100     | 99     |
| Fits with lower AIC |              |              | 499           | 1        | 76     | 11     | 88      | 11     |
| Minimum             |              | 480.4        | 438.1         | 424.4    | 408.6  | 407.6  | 440.3   | 430.0  |
| 25th percentile     | 688.0        | 657.3        | 683.5         | 678.9    | 604.2  | 595.7  | 648.8   | 647.0  |
| Median              | 800.0        | 772.9        | 1029.7        | 852.7    | 690.7  | 701.4  | 761.3   | 756.5  |
| 75th percentile     | 930.2        | 897.8        | 6483.5        | 1381.7   | 841.7  | 865.2  | 1075.9  | 1029.2 |
| Maximum             |              | 1401.2       | 856749.0      | 444191.3 | 4246.1 | 4260.1 | 57459.9 | 2829.1 |

## Biphasic decline with a metabolite

The analytical solution of the DFOP-SFO model used for the generation of the data shown in this section is given in Equation~1.

$$\begin{aligned}
 f^{(1)}(\psi, t) &= \gamma_1 p_0 e^{-\lambda_1 t} + (1 - \gamma_1) p_0 e^{-\lambda_2 t} \\
 f^{(2)}(\psi, t) &= \frac{(\gamma_2 \gamma_1 - \gamma_2) \lambda_2 p_0 e^{-\lambda_2 t}}{\lambda_2 - \lambda_3} - \frac{\gamma_2 \gamma_1 \lambda_1 p_0 e^{-\lambda_1 t}}{\lambda_1 - \lambda_3} + \\
 &\quad \frac{((\gamma_2 \lambda_1 + (\gamma_2 \gamma_1 - \gamma_2) \lambda_3) \lambda_2 - \gamma_2 \gamma_1 \lambda_3 \lambda_1) p_0 e^{-\lambda_3 t}}{(\lambda_1 - \lambda_3) \lambda_2 - \lambda_3 \lambda_1 + \lambda_3^2}
 \end{aligned} \tag{1}$$

Here,  $(p_0, 0)$  were used as the initial concentrations of parent compound and transformation product,  $\lambda_1$  and  $\lambda_2$  are the rate constants for the biexponential decline of the parent,  $\gamma_1$  is the fraction of the parent declining with  $\lambda_1$ ,  $\gamma_2$  is the fraction of the degrading parent compound forming the transformation product (formation fraction) and  $\lambda_3$  is the degradation rate constant of the transformation product.

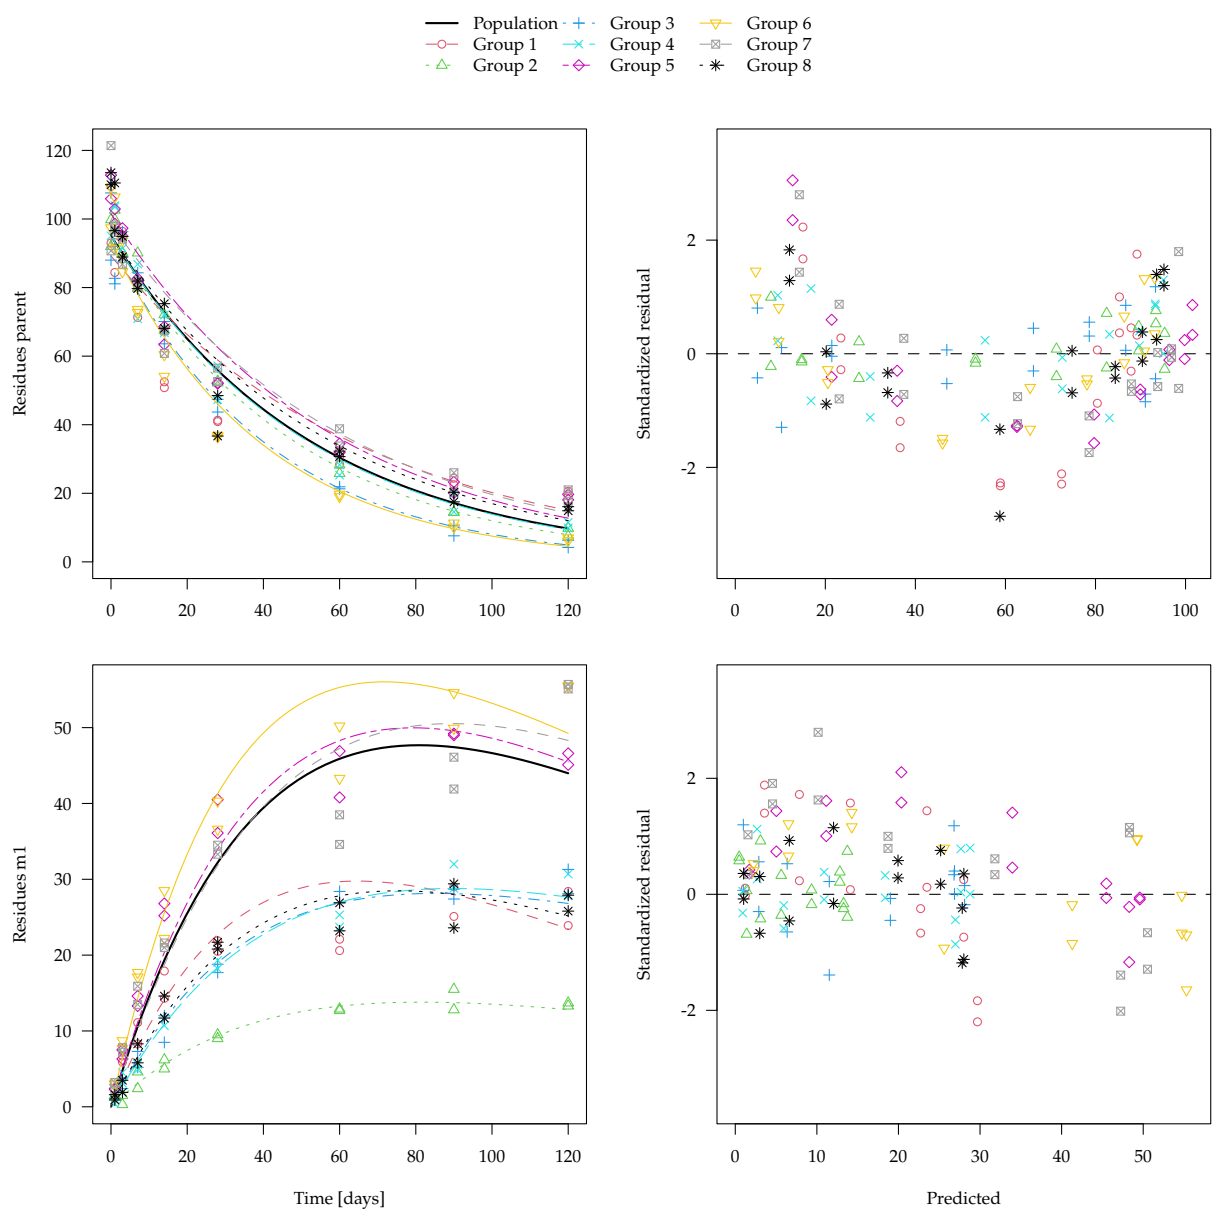

**Figure 30:** SFO-SFO saemix fit with two-component variance for DFOP-SFO dataset 1

**Table 7:** SFO-SFO population parameters for DFOP-SFO dataset 1

| Evaluation | Error model | AIC    | parent_0 | k_parent | f_parent_to_m1 | k_m1    |
|------------|-------------|--------|----------|----------|----------------|---------|
| Mean input |             |        | 102      | -        | 0.449          | 0.00174 |
| Separate   | const<br>tc |        | 97.9     | 0.0228   | 0.616          | 0.00422 |
|            |             |        | 94.3     | 0.0191   | 1              | 0.00687 |
| saemix     | const<br>tc | 1794.2 | 98       | 0.0229   | 0.548          | 0.00445 |
|            |             | 1689.9 | 95.2     | 0.019    | 0.917          | 0.00747 |



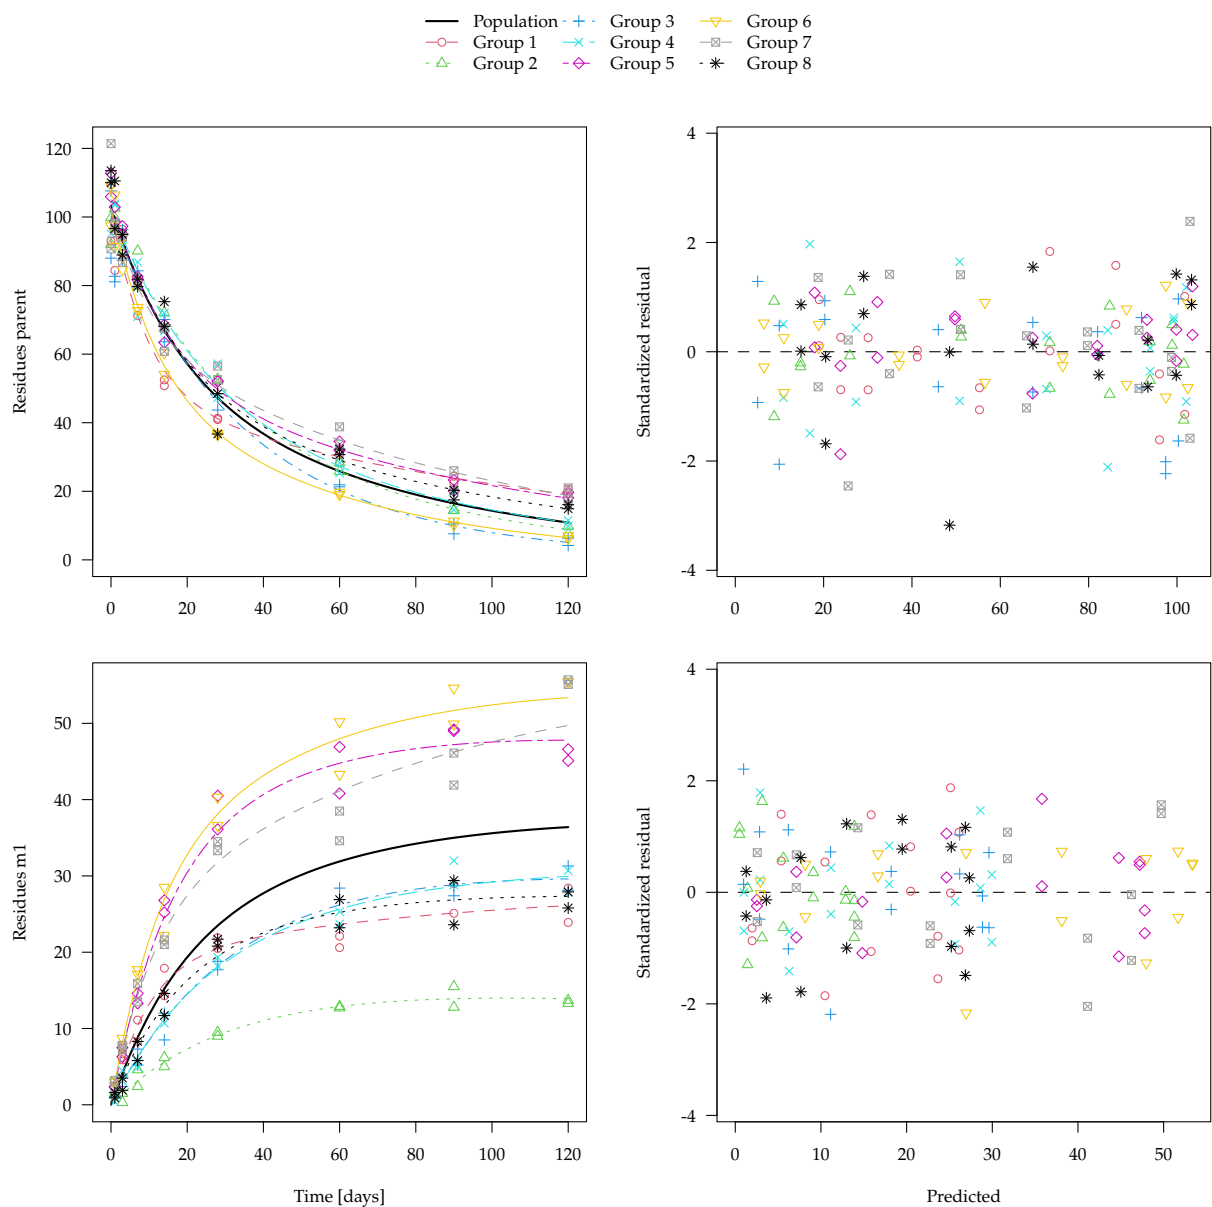

Figure 31: DFOP-SFO saemix fit with two-component variance for DFOP-SFO dataset 1

Table 8: DFOP-SFO population parameters for DFOP-SFO dataset 1

| Evaluation | Error model | AIC    | parent_0 | k1     | k2      | g     | f_parent_to_m1 | k_m1     |
|------------|-------------|--------|----------|--------|---------|-------|----------------|----------|
| Mean input |             |        | 102      | 0.0528 | 0.0122  | 0.505 | 0.449          | 0.00174  |
| Separate   | const       |        | 103      | 0.0598 | 0.0164  | 0.423 | 0.426          | 1.04e-05 |
|            | tc          |        | 102      | 0.048  | 0.00203 | 0.62  | 0.439          | 1.12e-05 |
| saemix     | const       | 1642.2 | 103      | 0.0564 | 0.0142  | 0.458 | 0.416          | 0.000456 |
|            | tc          | 1430.3 | 102      | 0.0553 | 0.0133  | 0.476 | 0.433          | 0.000952 |

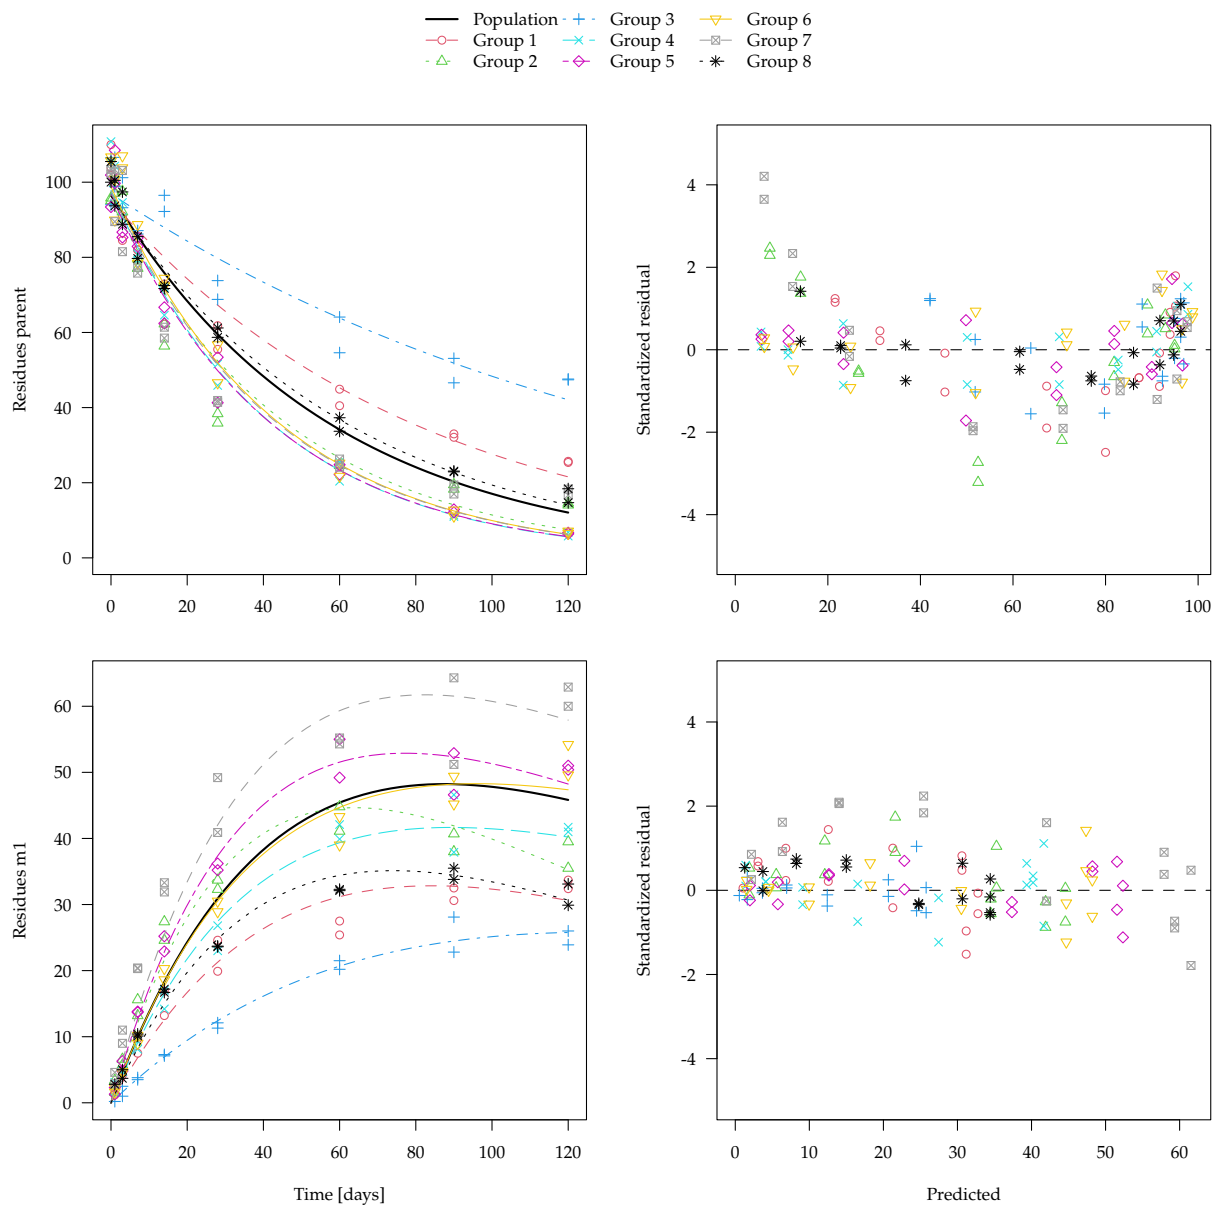

**Figure 32:** SFO-SFO saemix fit with two-component variance for DFOP-SFO dataset 2

**Table 9:** SFO-SFO population parameters for DFOP-SFO dataset 2

| Evaluation | Error model | AIC    | parent_0 | k_parent | f_parent_to_m1 | k_m1    |
|------------|-------------|--------|----------|----------|----------------|---------|
| Mean input |             |        | 101      | -        | 0.621          | 0.00216 |
| Separate   | const       |        | 98.7     | 0.0193   | 0.786          | 0.00508 |
|            | tc          |        | 97.2     | 0.0179   | 0.997          | 0.00663 |
| saemix     | const       | 1718   | 98.8     | 0.0194   | 0.725          | 0.00546 |
|            | tc          | 1681.4 | 96.7     | 0.0174   | 0.923          | 0.00703 |

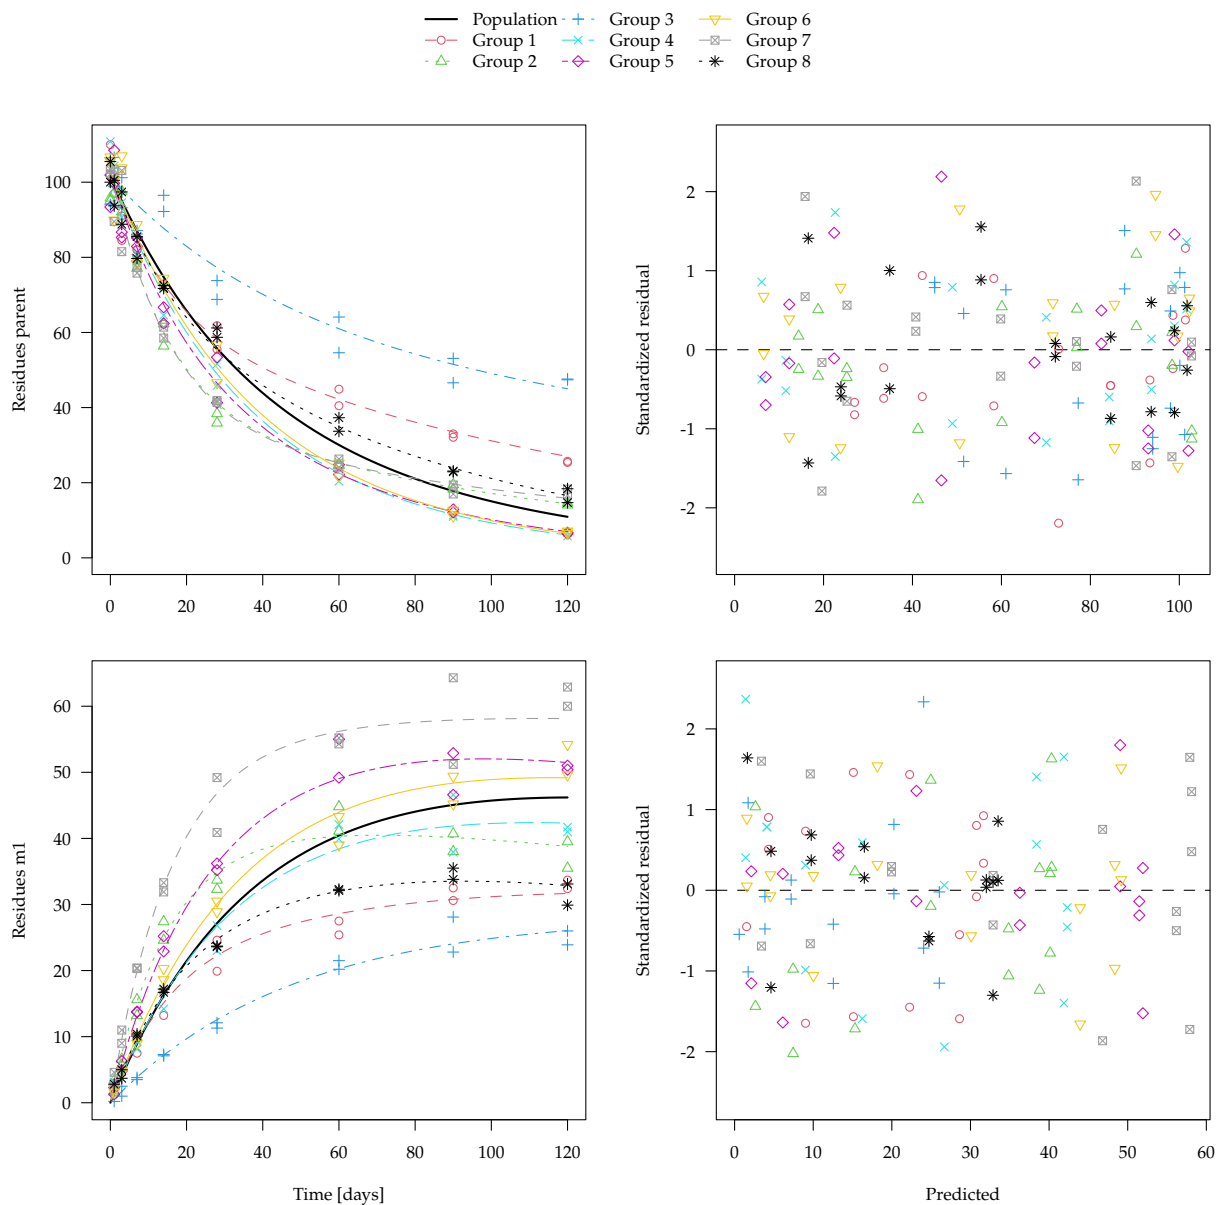

Figure 33: DFOP-SFO saemix fit with two-component variance for DFOP-SFO dataset 2

Table 10: DFOP-SFO population parameters for DFOP-SFO dataset 2

| Evaluation | Error model | AIC    | parent_0 | k1     | k2      | g     | f_parent_to_m1 | k_m1     |
|------------|-------------|--------|----------|--------|---------|-------|----------------|----------|
| Mean input |             |        | 101      | 0.046  | 0.00926 | 0.502 | 0.621          | 0.00216  |
| Separate   | const<br>tc |        | 103      | 0.0334 | 0.00229 | 0.549 | 0.581          | 7.93e-06 |
|            |             |        | 102      | 0.0309 | 0.0111  | 0.601 | 0.601          | 0.00153  |
| saemix     | const<br>tc | 1580.6 | 102      | 0.0265 | 0.0179  | 0.516 | 0.591          | 0.0019   |
|            |             | 1401.5 | 102      | 0.0314 | 0.0139  | 0.491 | 0.613          | 0.00224  |

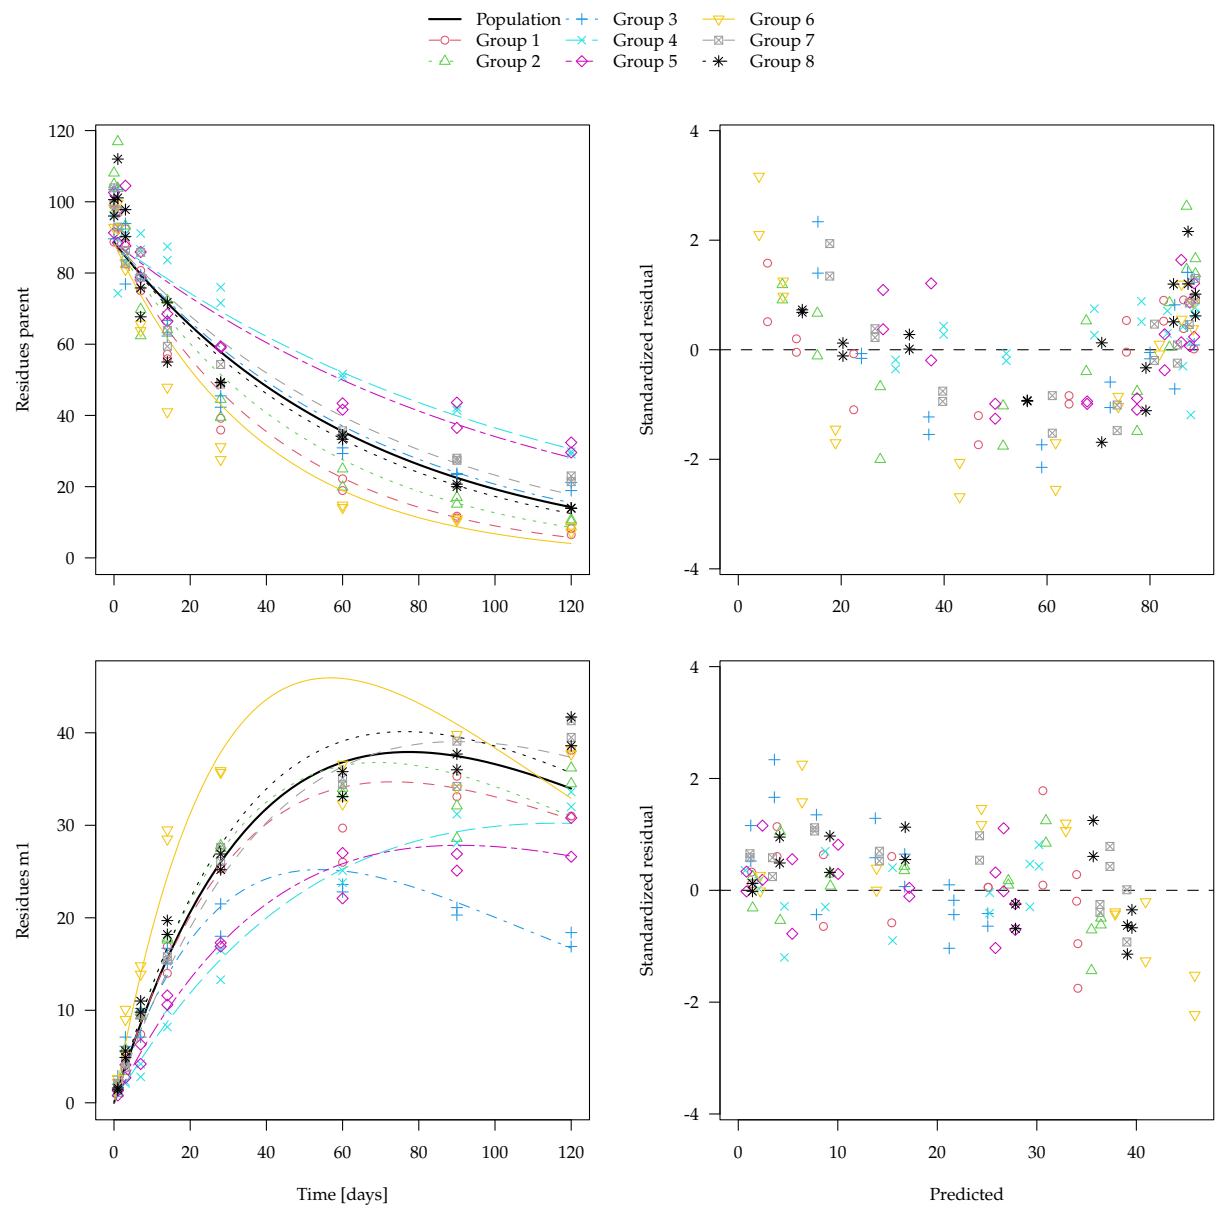

Figure 34: SFO-SFO saemix fit with two-component variance for DFOP-SFO dataset 3

Table 11: SFO-SFO population parameters for DFOP-SFO dataset 3

| Evaluation | Error model | AIC    | parent_0 | k_parent | f_parent_to_m1 | k_m1    |
|------------|-------------|--------|----------|----------|----------------|---------|
| Mean input |             |        | 98.6     | -        | 0.49           | 0.00166 |
| Separate   | const       |        | 94.5     | 0.0199   | 0.671          | 0.00608 |
|            | tc          |        | 91.4     | 0.0167   | 1              | 0.00923 |
| saemix     | const       | 1791.9 | 94.3     | 0.0199   | 0.607          | 0.00539 |
|            | tc          | 1664.1 | 88.6     | 0.0152   | 0.991          | 0.0108  |

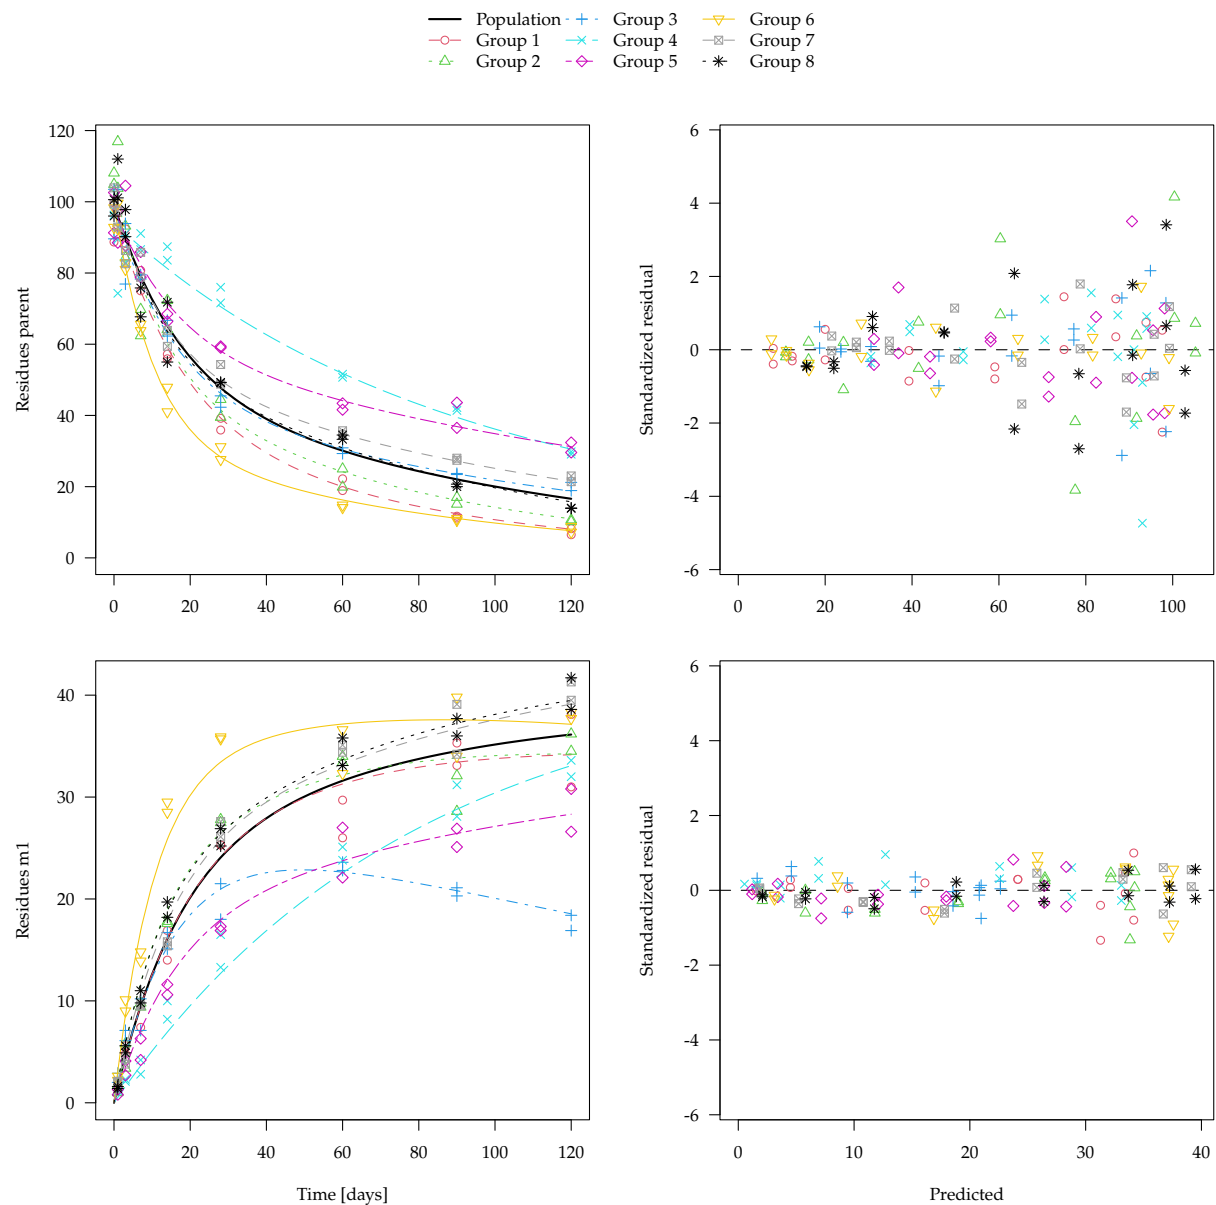

Figure 35: DFOP-SFO saemix fit with constant variance for DFOP-SFO dataset 3

Table 12: DFOP-SFO population parameters for DFOP-SFO dataset 3

| Evaluation | Error model | AIC    | parent_0 | k1     | k2      | g     | f_parent_to_m1 | k_m1     |
|------------|-------------|--------|----------|--------|---------|-------|----------------|----------|
| Mean input |             |        | 98.6     | 0.0555 | 0.00785 | 0.513 | 0.49           | 0.00166  |
| Separate   | const<br>tc |        | 99.7     | 0.0515 | 0.011   | 0.438 | 0.494          | 1.25e-05 |
|            |             |        | 98.4     | 0.0501 | 0.00872 | 0.499 | 0.509          | 1.63e-05 |
| saemix     | const<br>tc | 1636.4 | 99.3     | 0.0604 | 0.00921 | 0.496 | 0.474          | 0.000909 |
|            |             | 1409.4 | 98.5     | 0.0597 | 0.00882 | 0.48  | 0.489          | 0.00132  |

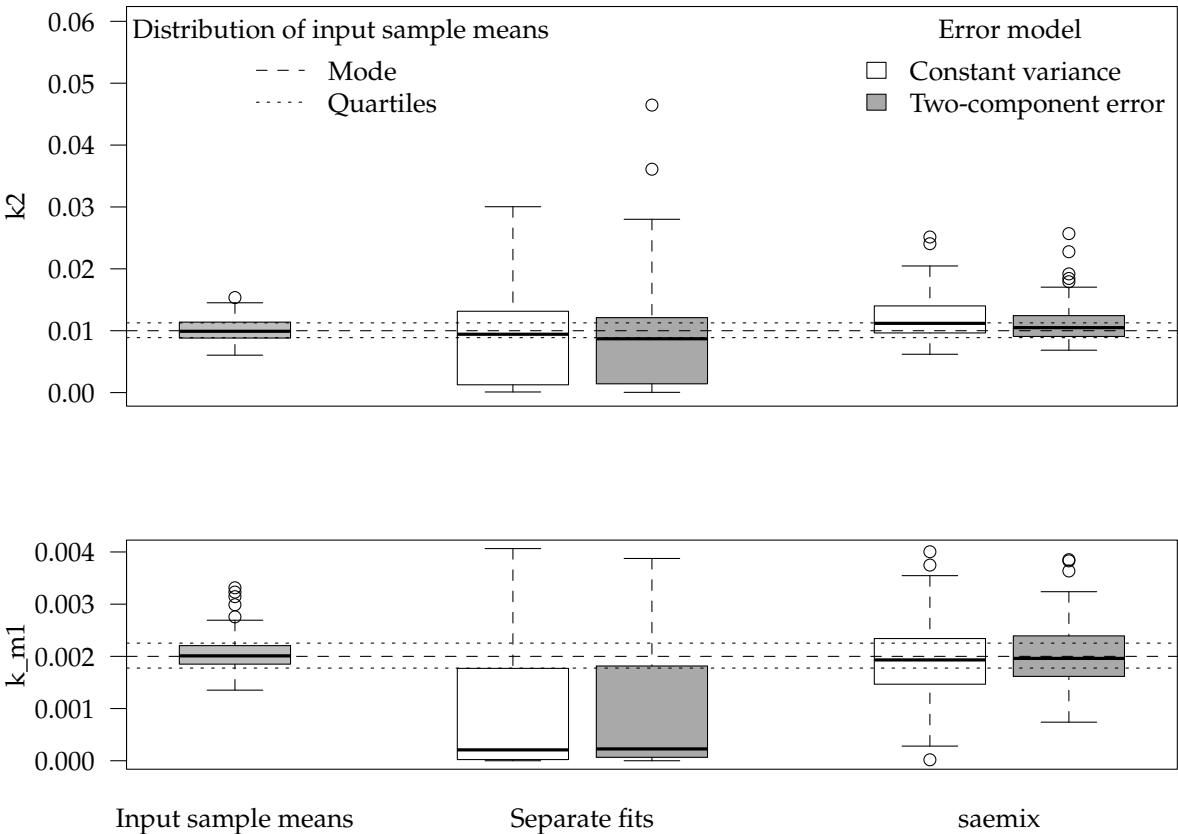

**Figure 36:** Selected population parameters obtained with DFOP-SFO for the biphasic datasets

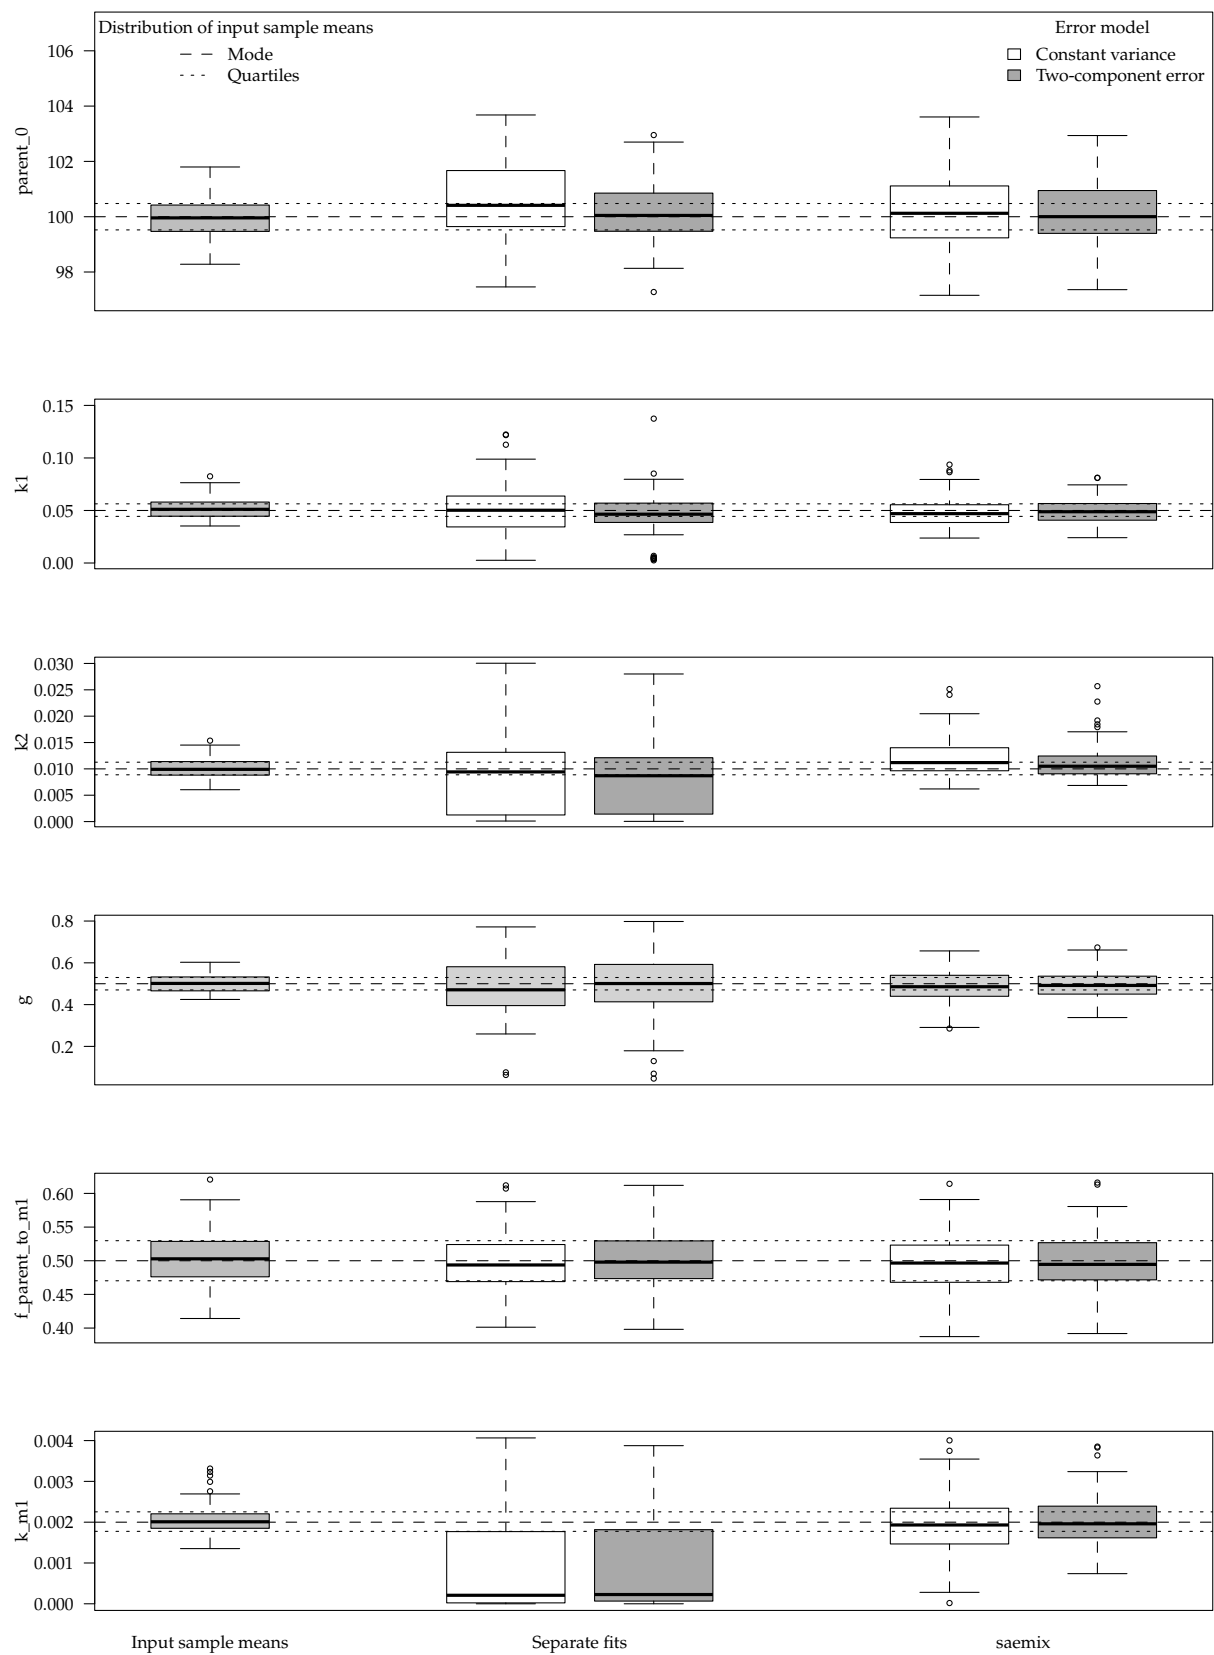

Figure 37: Population parameters obtained with DFOP-SFO for the biphasic datasets

## Evaluation of experimental data

Detailed statistical summaries of the fits are given in the Appendix.

### EU risk assessment of 2,4-D from 2014

In this section, the aerobic soil degradation data on 2,4-D as documented in the Review Assessment Report of the European Union pesticide risk assessment peer review 2014 are evaluated (EFSA, 2014). The data are used as available from the `mmkin` package. The dataset in the package already contains normalisation factors for time step normalisation to reference conditions. The following code shows how the data from the package is preprocessed for this analysis as described in the main article.

```
d24_ds <- lapply(1:5, function(i) {
  subset(D24_2014$ds[[i]]$data, time <= 120, c("name", "time", "value"))
})
names(d24_ds) <- sapply(D24_2014$ds, function(ds) ds$title)
d24_ds_norm <- lapply(1:5, function(i) {
  ds_i <- subset(D24_2014$ds[[i]]$data, time <= 120, c("name", "time", "value"))
  ds_i$time <- ds_i$time * D24_2014$f_time_norm[i]
  ds_i
})
names(d24_ds_norm) <- sapply(D24_2014$ds, function(ds) ds$title)
```

The result is a list of five time step normalised datasets for the five different soils, suitable for separate analysis with `mmkin` and subsequent simultaneous analysis `nlme.mmkin` and `saem.mmkin`.

In the assessments, D24 is used as compound code for 2,4-D, as object names cannot start with numbers in R. For transformation products 2,4-dichlorophenol and 2,4-dichloroaniline, compound codes DCP and DCA are used, respectively.

Note that no pathway fits were used in the EU assessment. Instead, the decline of the metabolites from their maximum was used to derive half-lives for metabolites. This introduces considerable bias, as the datasets where no decline phase for the metabolites was found were disregarded. Therefore, pathway fits are shown here for all data, either separately for the datasets or in a joint nonlinear mixed effects model fit.

### Separate kinetic fits for the parent compound

The SFO fits to the parent data in the five datasets are shown in Figure 38. The fitted parameters are shown in Table 13. The acceptability of the SFO fits according to the FOCUS criteria is clearly confirmed for The Mississippi, Fayette, and Site E1 datasets. Residual plots in the other two datasets show repeated positive residuals towards the end of the experimental period. However, as these occur at residue levels far below 10%, the fits are acceptable based on the recommendations in the FOCUS guidance.



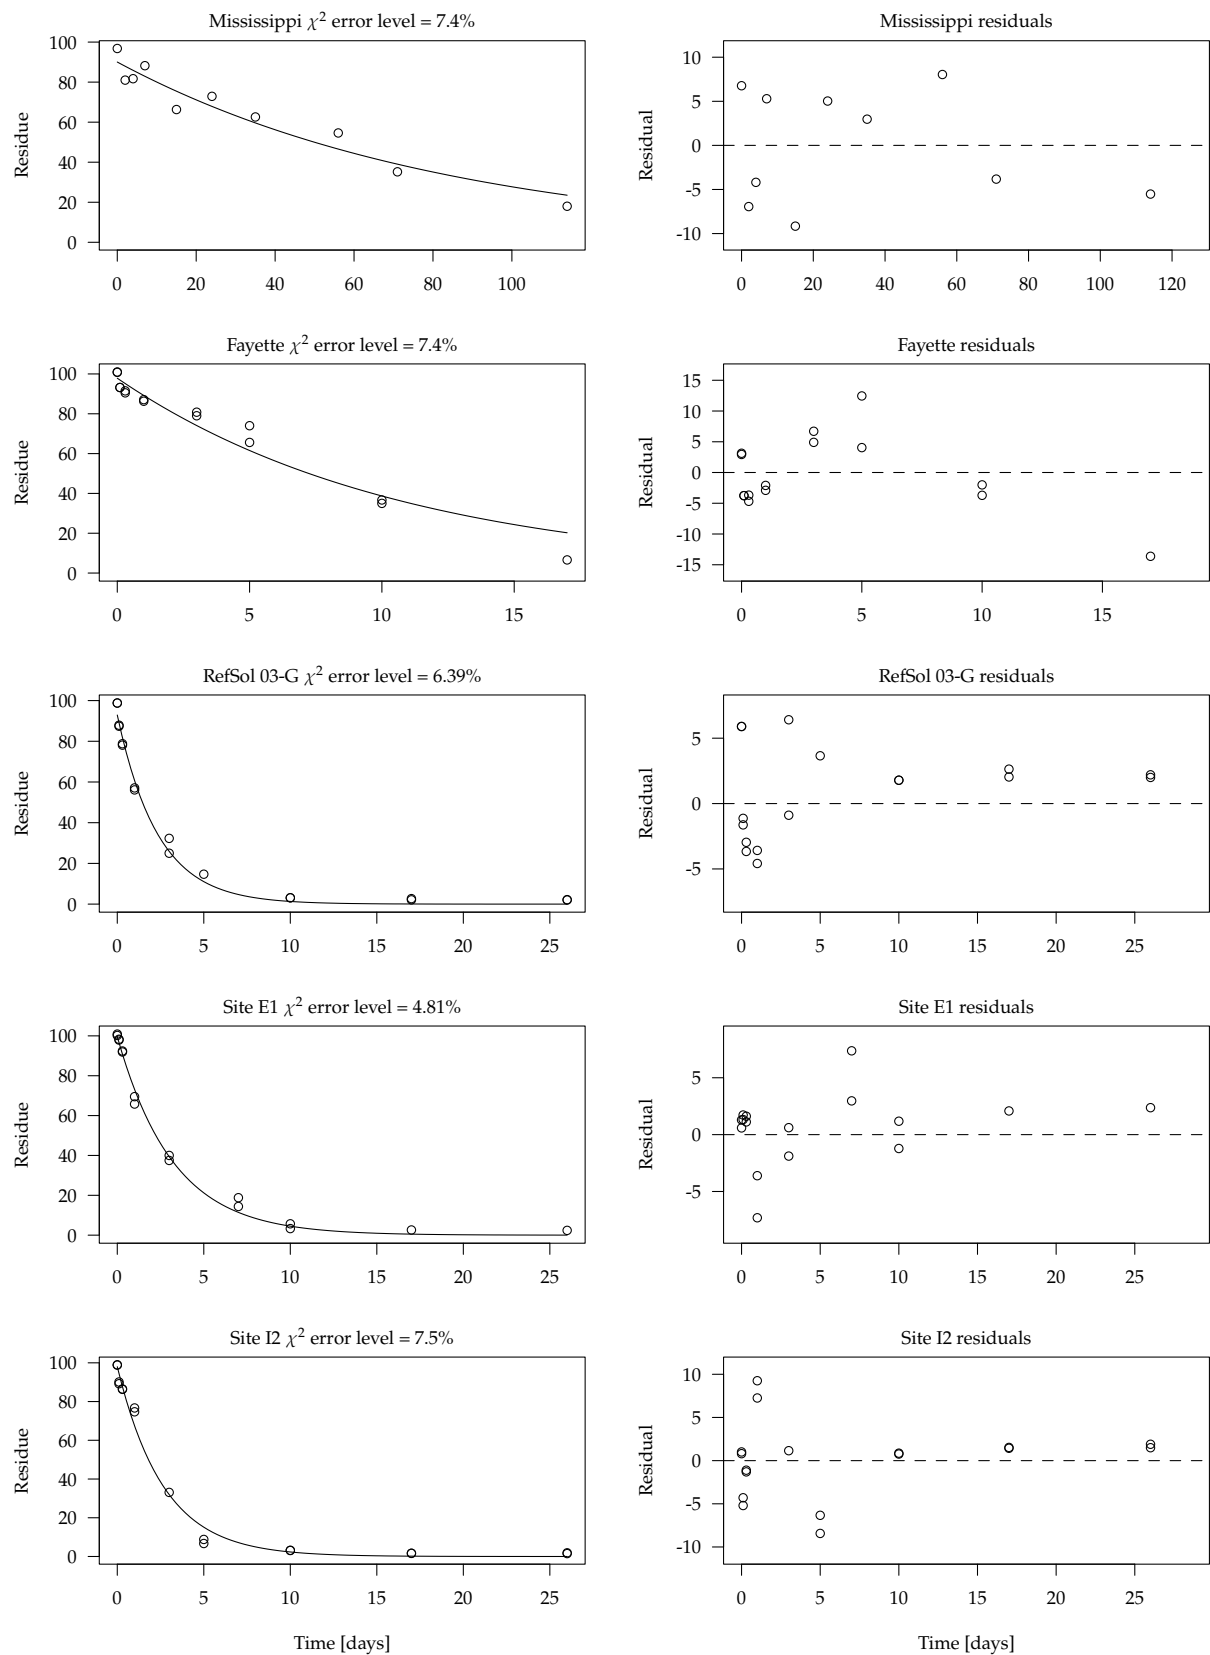

Figure 38: SFO parent kinetics in the datasets for 2,4-D

**Table 13:** Model parameters with confidence intervals and p-values

| Dataset     | Fitted parameters |                 |          |           |          |         |
|-------------|-------------------|-----------------|----------|-----------|----------|---------|
|             | Name              | Unit            | Estimate | Pr(>t)    | Lower    | Upper   |
| Mississippi | D24_0             | % AR            | 90.03    | 6.36e-09  | 82.86    | 97.21   |
|             | k_D24             | d <sup>-1</sup> | 0.01177  | 2.254e-05 | 0.009034 | 0.01535 |
|             | sigma             | % AR            | 6.059    | 0.001447  | 2.856    | 9.263   |
| Fayette     | D24_0             | % AR            | 97.87    | 4.891e-15 | 93.12    | 102.6   |
|             | k_D24             | d <sup>-1</sup> | 0.09275  | 2.222e-08 | 0.07745  | 0.1111  |
|             | sigma             | % AR            | 5.993    | 7.067e-05 | 3.609    | 8.378   |
| RefSol 03-G | D24_0             | % AR            | 92.91    | 2.452e-18 | 89.44    | 96.37   |
|             | k_D24             | d <sup>-1</sup> | 0.4259   | 1.77e-10  | 0.3706   | 0.4895  |
|             | sigma             | % AR            | 3.523    | 2.181e-05 | 2.227    | 4.819   |
| Site E1     | D24_0             | % AR            | 99.61    | 1.025e-18 | 96.68    | 102.5   |
|             | k_D24             | d <sup>-1</sup> | 0.3093   | 2.184e-11 | 0.2773   | 0.345   |
|             | sigma             | % AR            | 3.132    | 3.92e-05  | 1.936    | 4.328   |
| Site I2     | D24_0             | % AR            | 97.99    | 8.691e-18 | 94       | 102     |
|             | k_D24             | d <sup>-1</sup> | 0.3736   | 2.89e-10  | 0.3234   | 0.4316  |
|             | sigma             | % AR            | 4.288    | 2.181e-05 | 2.71     | 5.865   |

### Simultaneous kinetic fits for the parent compound

The mixed model SFO fit to the parent data as obtained by nlme and assuming constant variance is shown in Figure 39. The same fit obtained using the SAEM algorithm as implemented in saemix is shown in Figure 40. Note that the predictions for the individual datasets (coloured lines) are conditional on the population parameters that have been obtained.

Both fits look acceptable and can visually not be distinguished. An attempt to fit the FOMC model with nlme gives an error message, indicating that this fit is overparameterised. The FOMC fit can be done with saemix, but has a higher AIC (503.1 as compared to 498.7).

The residual plots do not indicate a relationship between the error and the predicted value. This is confirmed by the comparison of nlme fitted with the two error models.

|                   | Model | df | AIC      | BIC      | logLik    | Test   | L.Ratio    |
|-------------------|-------|----|----------|----------|-----------|--------|------------|
| f_d24_sfo_nlme    | 1     | 5  | 498.6652 | 510.2527 | -244.3326 |        |            |
| f_d24_sfo_nlme_tc | 2     | 6  | 500.6652 | 514.5702 | -244.3326 | 1 vs 2 | 4.8836e-06 |
|                   |       |    | p-value  |          |           |        |            |
| f_d24_sfo_nlme    |       |    |          |          |           |        |            |
| f_d24_sfo_nlme_tc |       |    | 0.9982   |          |           |        |            |

This can also be confirmed by comparing the corresponding saemix fits, which shows lower values for AIC and BIC for constant variance (first row). Here we also show that the FOMC model (third row) is less preferable.

Likelihoods calculated by importance sampling

|   | AIC      | BIC      |
|---|----------|----------|
| 1 | 498.7344 | 496.7816 |
| 2 | 500.7324 | 498.3890 |
| 3 | 503.1380 | 500.4041 |

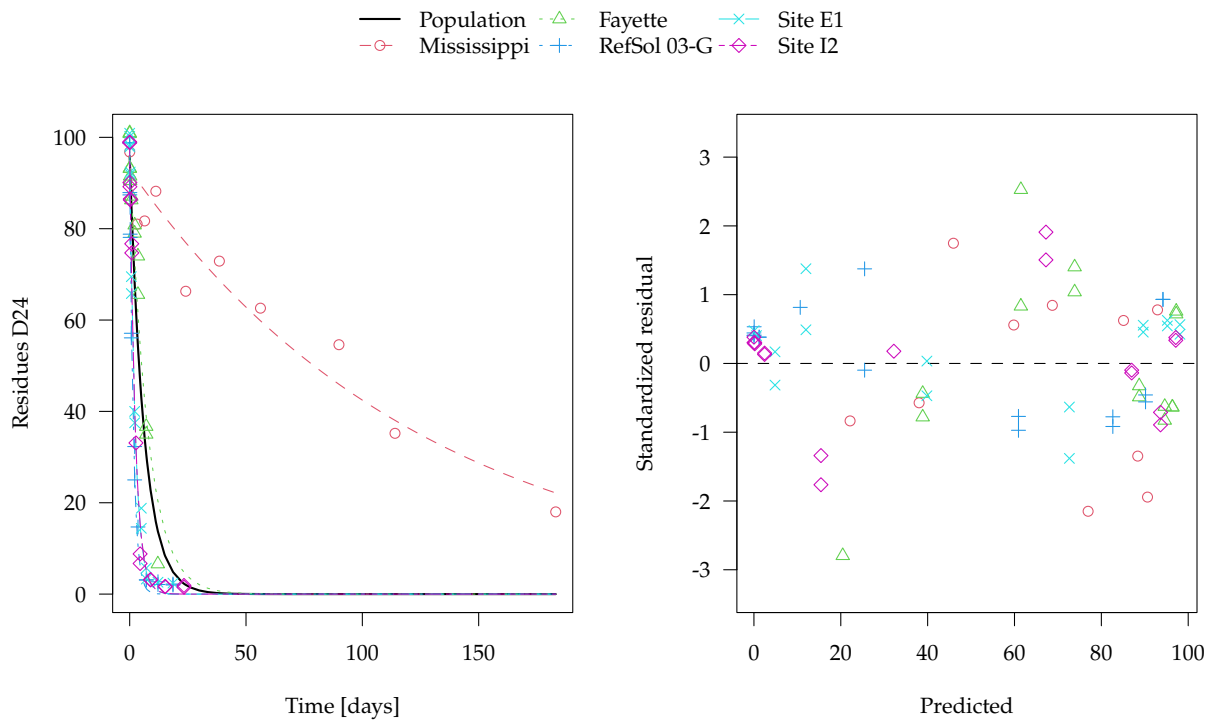

Figure 39: Mixed model SFO kinetics in the datasets for 2,4-D fitted by nlme

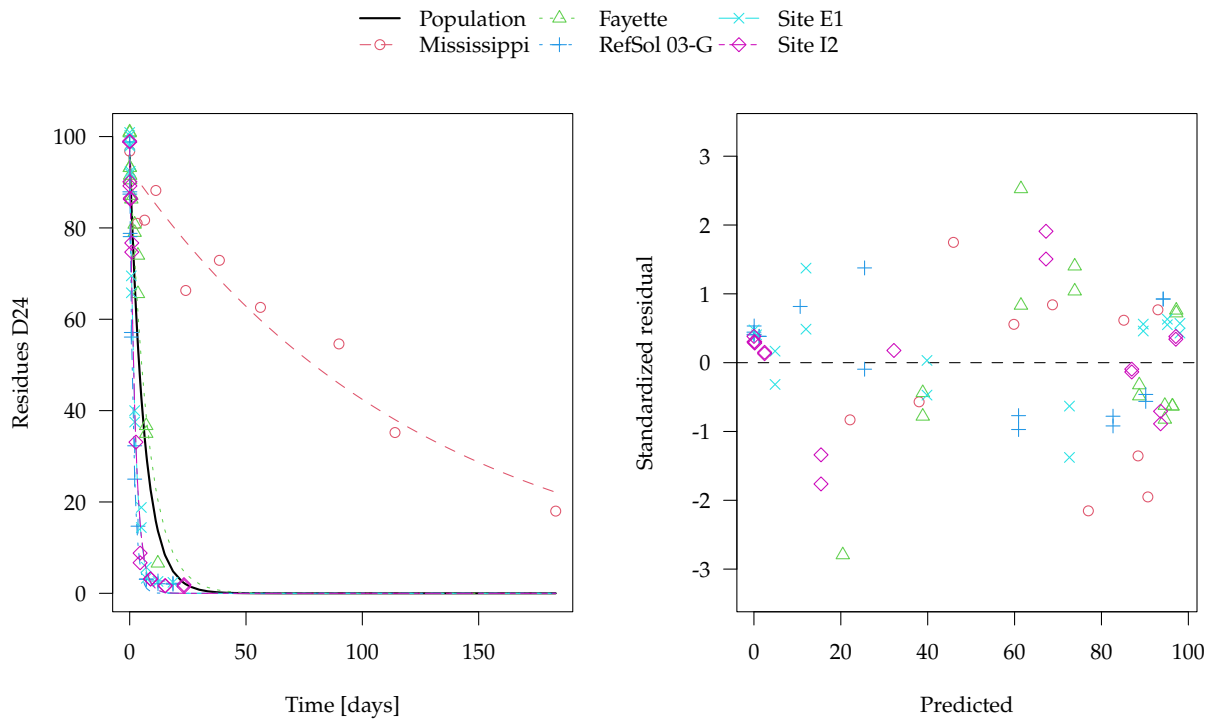

Figure 40: Mixed model SFO kinetics in the datasets for 2,4-D fitted by saemix

### Separate pathway fits

In the following, the coupled fits with the linear kinetic pathway from the parent compound via DCP to DCA using SFO for all compounds to the datasets obtained at 20°C in the study by Liu and Adelfinskaya (2011) are discussed. In the fits, the error model “variance by variable”, fitted by the iteratively reweighted least squares (IRLS) algorithm, is used.

Figure 41 shows the fit for the Fayette datasets.

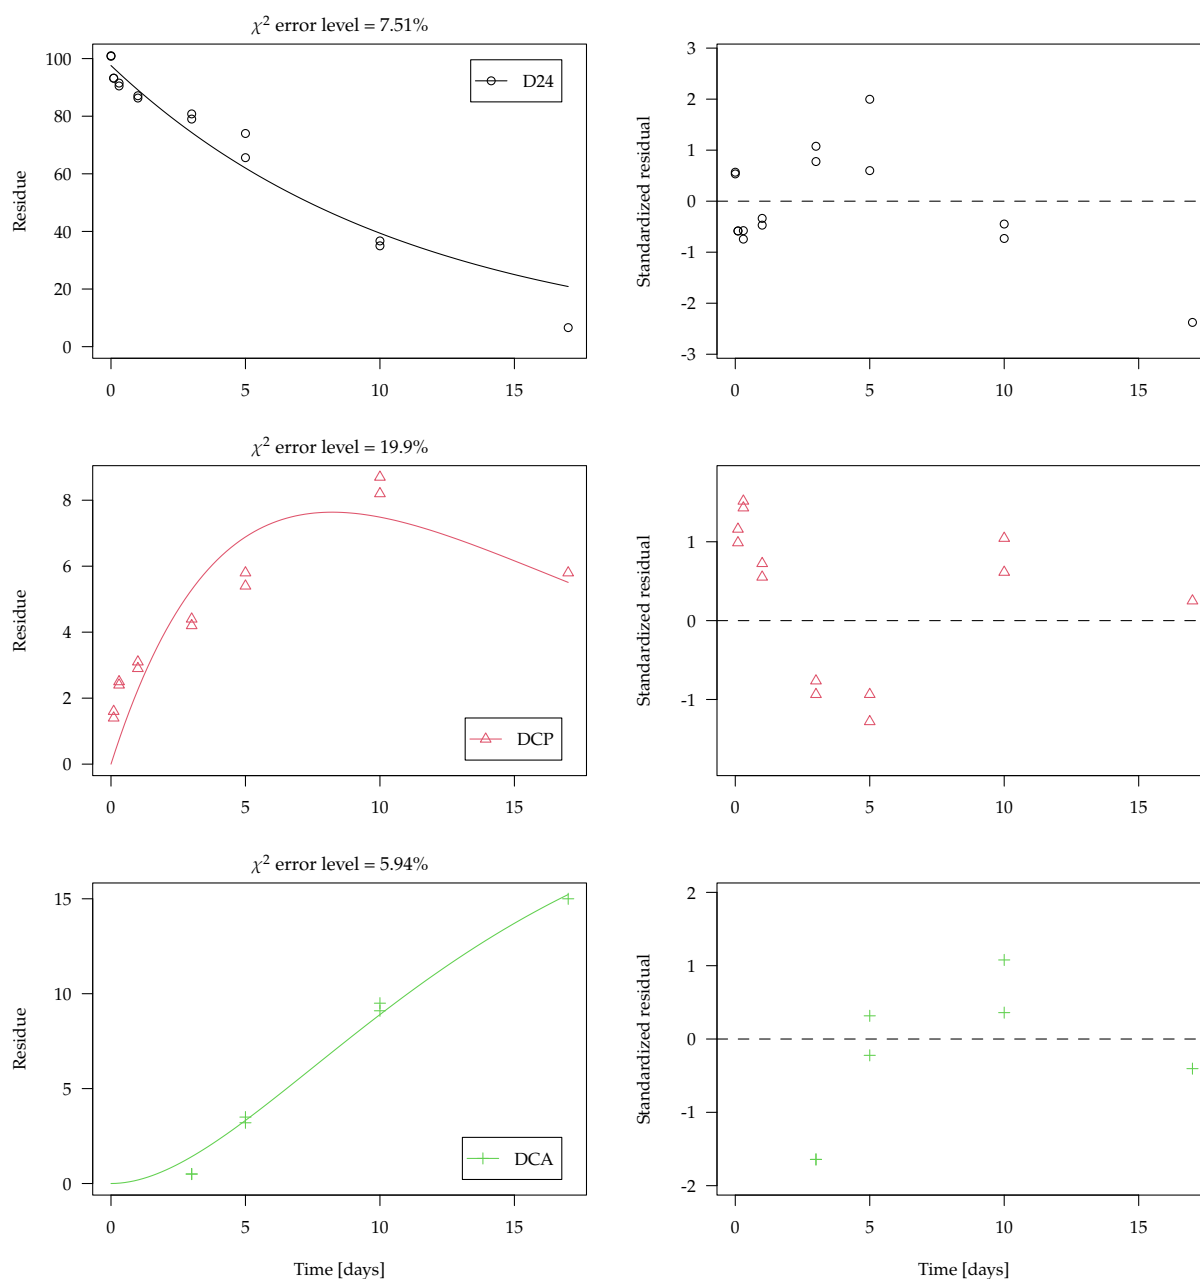

**Figure 41:** SFO-SFO-SFO fit for 2,4-D, Fayette

The fit looks visually acceptable and the degradation rate constant for DCP is significantly different from zero according to the t-test recommended in the FOCUS guidance, while the rate constant of

DCA is not significantly different from zero (Table 14). As the formation fraction from DCP to DCA is found to be exactly 1, the fit was repeated without a pathway from DCP to other compounds (“sink”). The acronym “SFO-SFO(ns)-SFO” is used for this model.

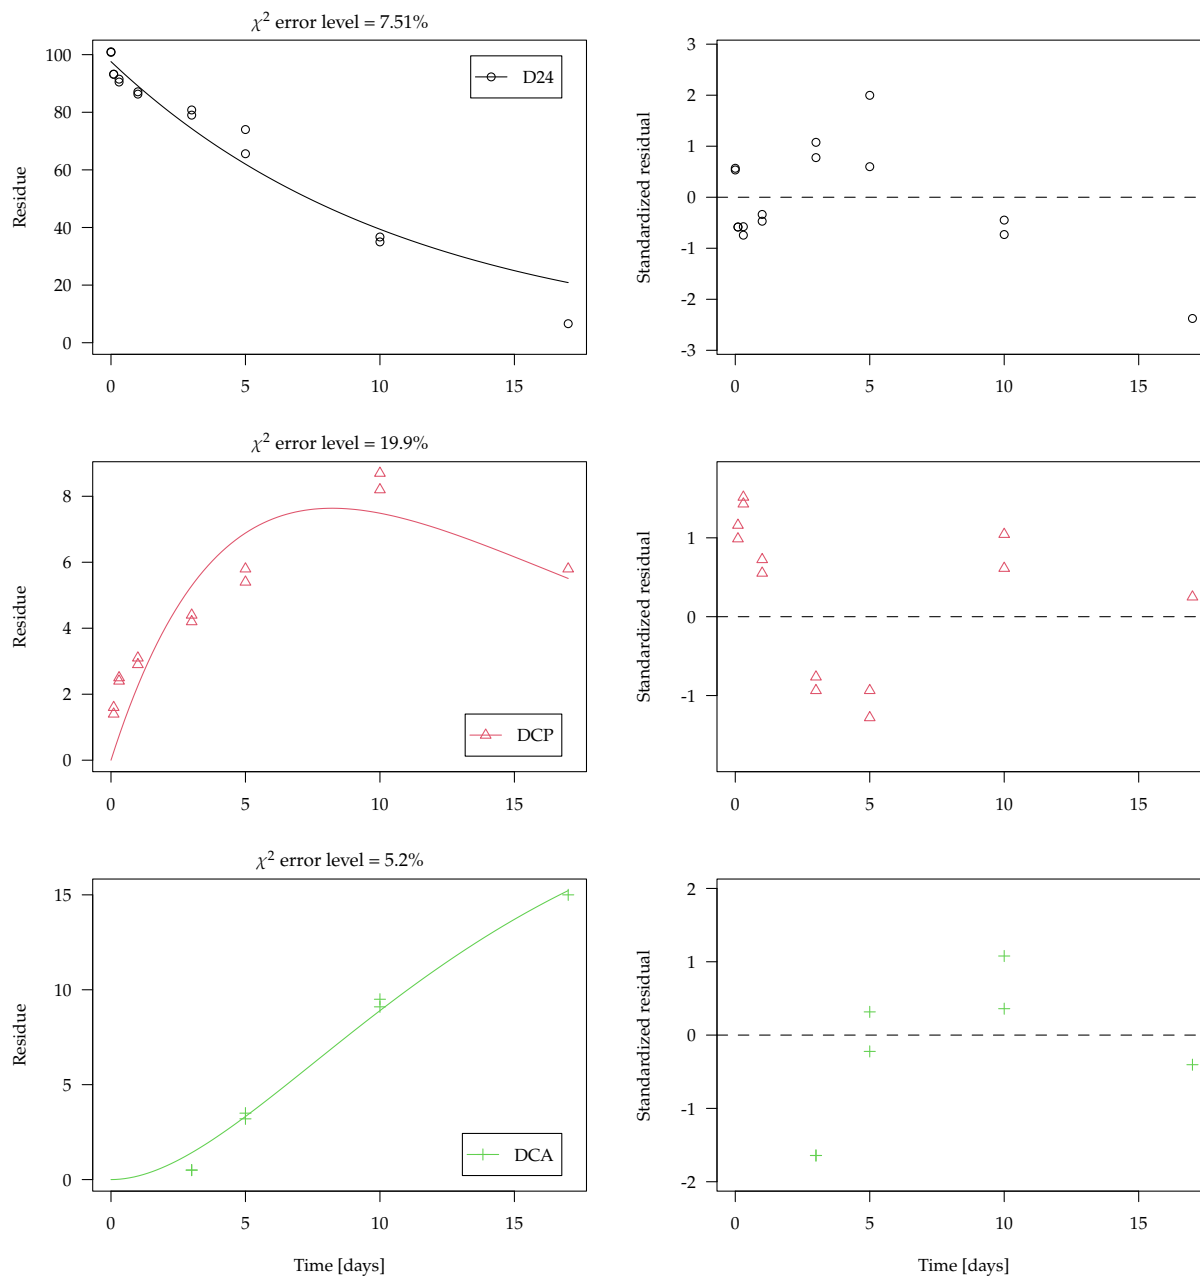

**Figure 42:** SFO-SFO(ns)-SFO fit for 2,4-D, Fayette

The reduction in degrees of freedom for the metabolite curves leads to a lower p-values for their rate constants. However, the p-value for the rate constant of DCA is around 0.15, and therefore expert judgement is needed according to the FOCUS guidance to specify a default value to use for this fit.

**Table 14:** Model parameters with confidence intervals and p-values

| Model           | Name         | Unit            | Fitted parameters |           |          |         |
|-----------------|--------------|-----------------|-------------------|-----------|----------|---------|
|                 |              |                 | Estimate          | Pr(>t)    | Lower    | Upper   |
| SFO-SFO-SFO     | D24_0        | % AR            | 97.59             | 2.009e-26 | 93.11    | 102.1   |
|                 | k_D24        | d <sup>-1</sup> | 0.09072           | 1.914e-12 | 0.07663  | 0.1074  |
|                 | k_DCP        | d <sup>-1</sup> | 0.1589            | 3.474e-05 | 0.1353   | 0.1866  |
|                 | k_DCA        | d <sup>-1</sup> | 0.01166           | 0.2613    | 0.001757 | 0.07742 |
|                 | f_D24_to_DCP | -               | 0.2889            | 2.788e-07 | 0.2382   | 0.3456  |
|                 | f_DCP_to_DCA | -               | 1                 | 0.0009445 | 0        | 1       |
|                 | sigma_D24    | % AR            | 6.008             | 5.117e-06 | 3.743    | 8.272   |
|                 | sigma_DCP    | % AR            | 1.161             | 3.073e-05 | 0.6884   | 1.634   |
|                 | sigma_DCA    | % AR            | 0.5565            | 0.0005622 | 0.2473   | 0.8657  |
| SFO-SFO(ns)-SFO | D24_0        | % AR            | 97.59             | 3.458e-27 | 93.12    | 102.1   |
|                 | k_D24        | d <sup>-1</sup> | 0.09072           | 8.811e-13 | 0.07666  | 0.1074  |
|                 | k_DCP        | d <sup>-1</sup> | 0.1589            | 2.903e-13 | 0.1353   | 0.1865  |
|                 | k_DCA        | d <sup>-1</sup> | 0.01166           | 0.1436    | 0.001763 | 0.07715 |
|                 | f_D24_to_DCP | -               | 0.2889            | 8.264e-12 | 0.2383   | 0.3455  |
|                 | sigma_D24    | % AR            | 6.008             | 4.526e-06 | 3.747    | 8.268   |
|                 | sigma_DCP    | % AR            | 1.161             | 1.339e-05 | 0.6893   | 1.633   |
|                 | sigma_DCA    | % AR            | 0.5565            | 0.0004869 | 0.2479   | 0.8651  |

The AIC comparison shows that removing the sink improves the AIC by reducing the number of parameters in the model. The use of the two-component error model (f\_d24\_tc) leads to a higher AIC compared to “variance by variable” (f\_d24\_obs).

|                                   | df | AIC      |
|-----------------------------------|----|----------|
| f_d24_obs[["SFO-SFO-SFO", 2]]     | 9  | 166.7987 |
| f_d24_obs[["SFO-SFO(ns)-SFO", 2]] | 8  | 164.7987 |
| f_d24_tc[["SFO-SFO-SFO", 2]]      | 8  | 193.4438 |
| f_d24_tc[["SFO-SFO(ns)-SFO", 2]]  | 7  | 191.4438 |

The likelihood ratio test confirms that the “variance by variable” error model is preferable, but does not show a significant difference between the models with and without sink (see below).

## Likelihood ratio test

Model 1: SF0-SF0(ns)-SF0 with error model obs and fixed parameter(s) DCP\_0, DCA\_0

Model 2: SF0-SF0(ns)-SF0 with error model tc and fixed parameter(s) DCP\_0, DCA\_0

|   | #Df | LogLik  | Df | Chisq  | Pr(>Chisq)    |
|---|-----|---------|----|--------|---------------|
| 1 | 8   | -74.399 |    |        |               |
| 2 | 7   | -88.722 | -1 | 28.645 | 8.693e-08 *** |

---

Signif. codes: 0 '\*\*\*' 0.001 '\*\*' 0.01 '\*' 0.05 '.' 0.1 ' ' 1

## Likelihood ratio test

Model 1: SF0-SF0-SF0 with error model obs and fixed parameter(s) DCP\_0, DCA\_0

Model 2: SF0-SF0(ns)-SF0 with error model obs and fixed parameter(s) DCP\_0, DCA\_0

|   | #Df | LogLik  | Df | Chisq | Pr(>Chisq) |
|---|-----|---------|----|-------|------------|
| 1 | 9   | -74.399 |    |       |            |
| 2 | 8   | -74.399 | -1 | 0     | 0.9999     |



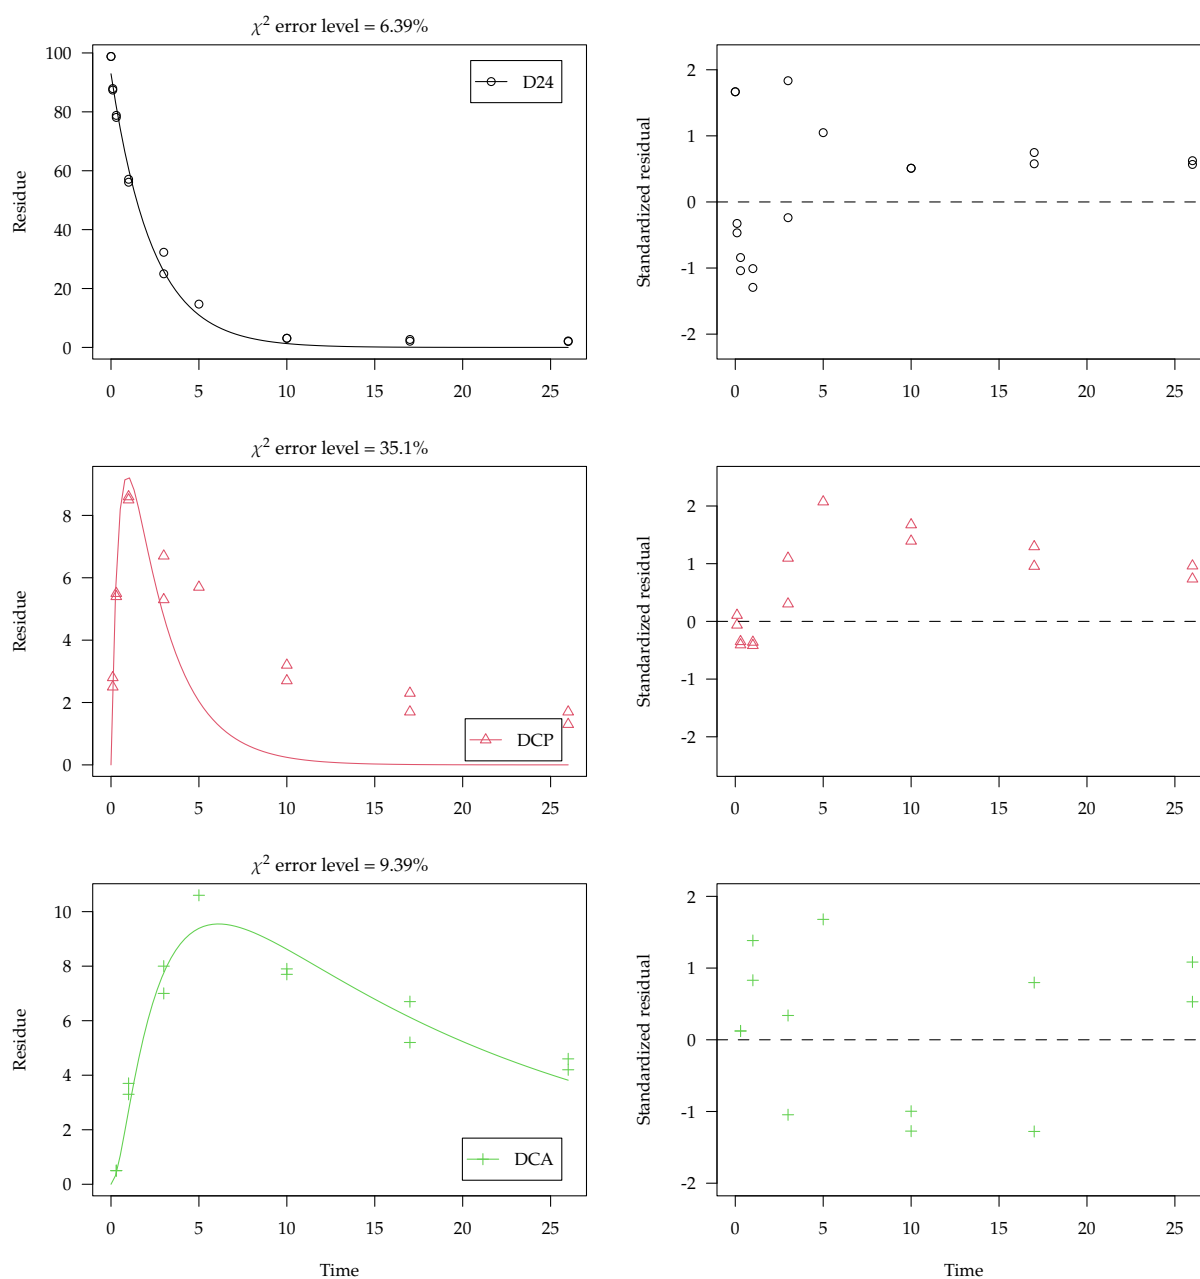

**Figure 43:** SFO-SFO-SFO fit for 2,4-D, RefSol 03-G

The fit for RefSol 03-G 43 looks visually acceptable for the parent and for DCA, while there are some systematic deviations in the fit for DCP, indicating biphasic behaviour for this metabolite. Parameter t-tests do not indicate problems and do not suggest to use a reduced model (Table 15).

**Table 15:** Model parameters with confidence intervals and p-values

| Model       | Fitted parameters |                 |          |           |         |         |
|-------------|-------------------|-----------------|----------|-----------|---------|---------|
|             | Name              | Unit            | Estimate | Pr(>t)    | Lower   | Upper   |
| SFO-SFO-SFO | D24_0             | % AR            | 92.93    | 2.134e-37 | 89.67   | 96.19   |
|             | k_D24             | d <sup>-1</sup> | 0.4267   | 6.245e-18 | 0.3748  | 0.4857  |
|             | k_DCP             | d <sup>-1</sup> | 2.148    | 0.00464   | 1.027   | 4.492   |
|             | k_DCA             | d <sup>-1</sup> | 0.05274  | 3.346e-09 | 0.04029 | 0.06904 |
|             | f_D24_to_DCP      | -               | 0.7482   | 0.0003974 | 0.248   | 0.964   |
|             | f_DCP_to_DCA      | -               | 0.185    | 0.0009879 | 0.0972  | 0.3236  |
|             | sigma_D24         | % AR            | 3.523    | 5.85e-07  | 2.298   | 4.748   |
|             | sigma_DCP         | % AR            | 1.766    | 1.54e-05  | 1.014   | 2.517   |
|             | sigma_DCA         | % AR            | 0.7225   | 5.374e-05 | 0.3856  | 1.059   |

The AIC comparison suggests that the model including the pathway from DCP to sink fitted assuming variance by variable is the preferred variant for this dataset.

|                                   | df | AIC      |
|-----------------------------------|----|----------|
| f_d24_obs[["SFO-SFO-SFO", 3]]     | 9  | 197.1267 |
| f_d24_obs[["SFO-SFO(ns)-SFO", 3]] | 8  | 221.0217 |
| f_d24_tc[["SFO-SFO-SFO", 3]]      | 8  | 200.7663 |
| f_d24_tc[["SFO-SFO(ns)-SFO", 3]]  | 7  | 218.4091 |

The likelihood ratio test confirms that the “variance by variable” error model is preferable, and confirms that the model including the pathway from DCP to sink is preferable.

## Likelihood ratio test

Model 1: SF0-SF0-SF0 with error model obs and fixed parameter(s) DCP\_0, DCA\_0

Model 2: SF0-SF0-SF0 with error model tc and fixed parameter(s) DCP\_0, DCA\_0

|   | #Df | LogLik  | Df | Chisq  | Pr(>Chisq) |
|---|-----|---------|----|--------|------------|
| 1 | 9   | -89.563 |    |        |            |
| 2 | 8   | -92.383 | -1 | 5.6396 | 0.01756 *  |

---

Signif. codes: 0 '\*\*\*' 0.001 '\*\*' 0.01 '\*' 0.05 '.' 0.1 ' ' 1

## Likelihood ratio test

Model 1: SF0-SF0-SF0 with error model obs and fixed parameter(s) DCP\_0, DCA\_0

Model 2: SF0-SF0(ns)-SF0 with error model obs and fixed parameter(s) DCP\_0, DCA\_0

|   | #Df | LogLik   | Df | Chisq  | Pr(>Chisq)    |
|---|-----|----------|----|--------|---------------|
| 1 | 9   | -89.563  |    |        |               |
| 2 | 8   | -102.511 | -1 | 25.895 | 3.605e-07 *** |

---

Signif. codes: 0 '\*\*\*' 0.001 '\*\*' 0.01 '\*' 0.05 '.' 0.1 ' ' 1

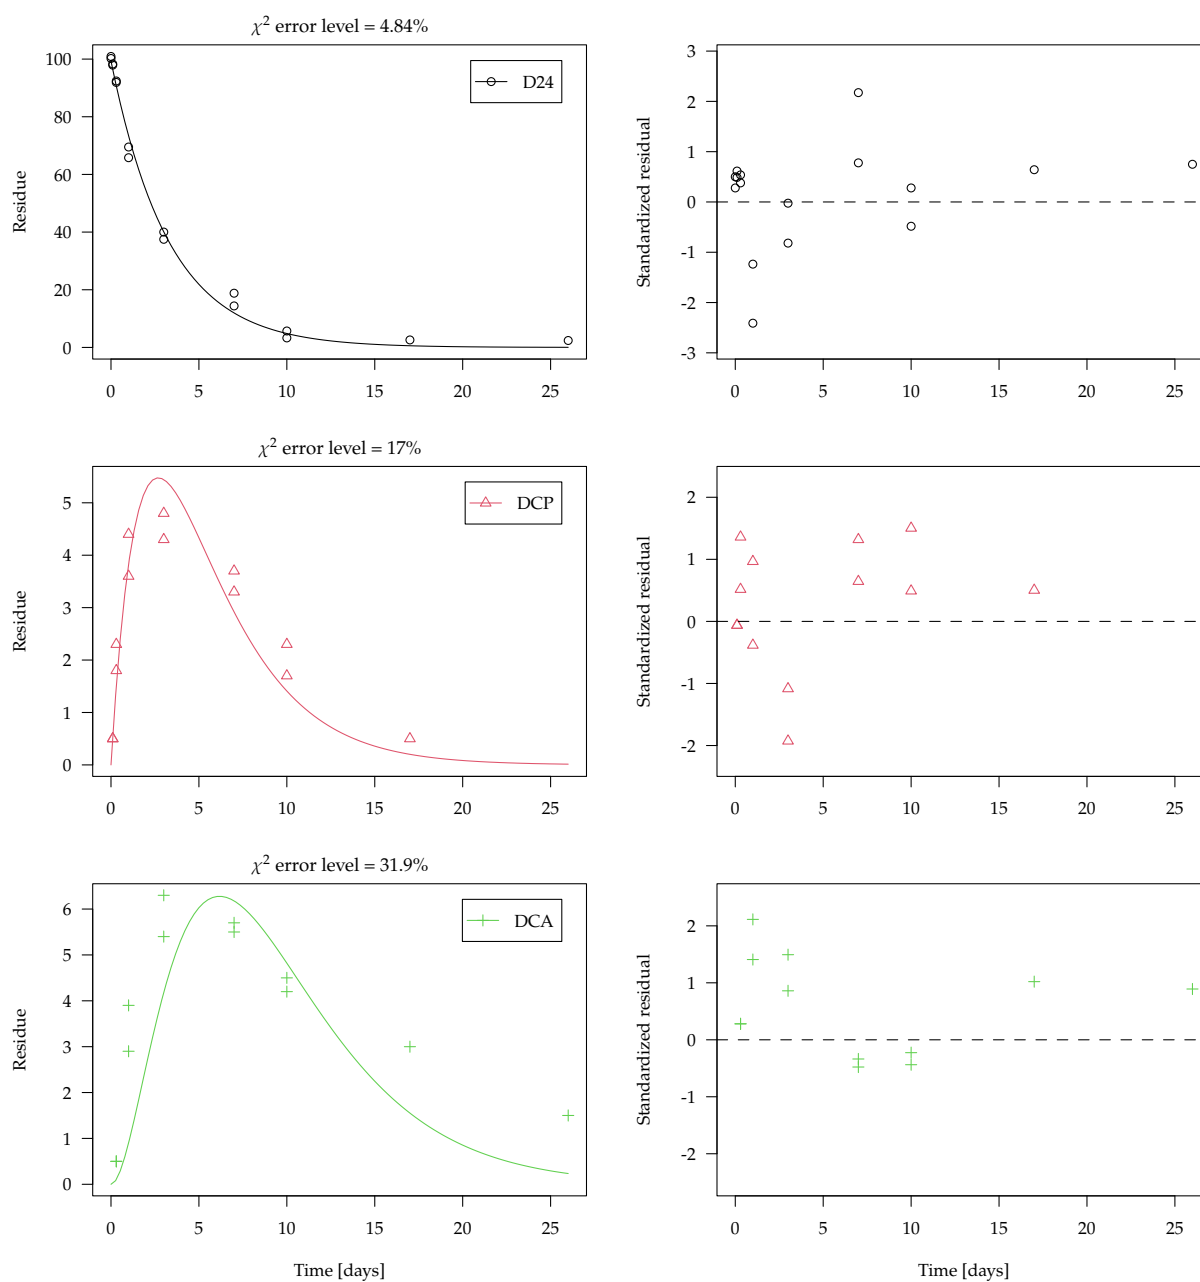

**Figure 44:** SFO-SFO-SFO fit for 2,4-D, Site E1

The fit for Site E1 44 looks visually acceptable for the parent and for DCP and for the most part of the DCA curve, only the last points are not found very well. As was the case for the Fayette dataset, the formation fraction from DCP to DCA is one, so the model without the pathway from DCP to sink is shown as well. Besides this possibility for improvement, the parameter statistics do not indicate problems (Table 16).

**Table 16:** Model parameters with confidence intervals and p-values

| Model           | Name         | Unit            | Fitted parameters |           |        |        |
|-----------------|--------------|-----------------|-------------------|-----------|--------|--------|
|                 |              |                 | Estimate          | Pr(>t)    | Lower  | Upper  |
| SFO-SFO-SFO     | D24_0        | % AR            | 99.32             | 2.639e-37 | 96.52  | 102.1  |
|                 | k_D24        | d <sup>-1</sup> | 0.3025            | 3.343e-19 | 0.2716 | 0.337  |
|                 | k_DCP        | d <sup>-1</sup> | 0.4512            | 2.086e-05 | 0.2941 | 0.6921 |
|                 | k_DCA        | d <sup>-1</sup> | 0.2501            | 0.04773   | 0.1491 | 0.4195 |
|                 | f_D24_to_DCP | -               | 0.1855            | 1.964e-07 | 0.1333 | 0.2521 |
|                 | f_DCP_to_DCA | -               | 1                 | 0.01212   | 0      | 1      |
|                 | sigma_D24    | % AR            | 3.151             | 1.809e-06 | 2.002  | 4.3    |
|                 | sigma_DCP    | % AR            | 0.5932            | 6.883e-05 | 0.3144 | 0.872  |
|                 | sigma_DCA    | % AR            | 1.419             | 0.0007881 | 0.7083 | 2.13   |
| SFO-SFO(ns)-SFO | D24_0        | % AR            | 99.32             | 3.365e-38 | 96.52  | 102.1  |
|                 | k_D24        | d <sup>-1</sup> | 0.3025            | 1.508e-19 | 0.2716 | 0.337  |
|                 | k_DCP        | d <sup>-1</sup> | 0.4512            | 1.867e-05 | 0.2942 | 0.6917 |
|                 | k_DCA        | d <sup>-1</sup> | 0.2501            | 0.0002008 | 0.1492 | 0.4193 |
|                 | f_D24_to_DCP | -               | 0.1855            | 1.625e-07 | 0.1333 | 0.2521 |
|                 | sigma_D24    | % AR            | 3.151             | 1.639e-06 | 2.003  | 4.299  |
|                 | sigma_DCP    | % AR            | 0.5932            | 6.455e-05 | 0.3147 | 0.8716 |
|                 | sigma_DCA    | % AR            | 1.419             | 0.0001394 | 0.7091 | 2.129  |

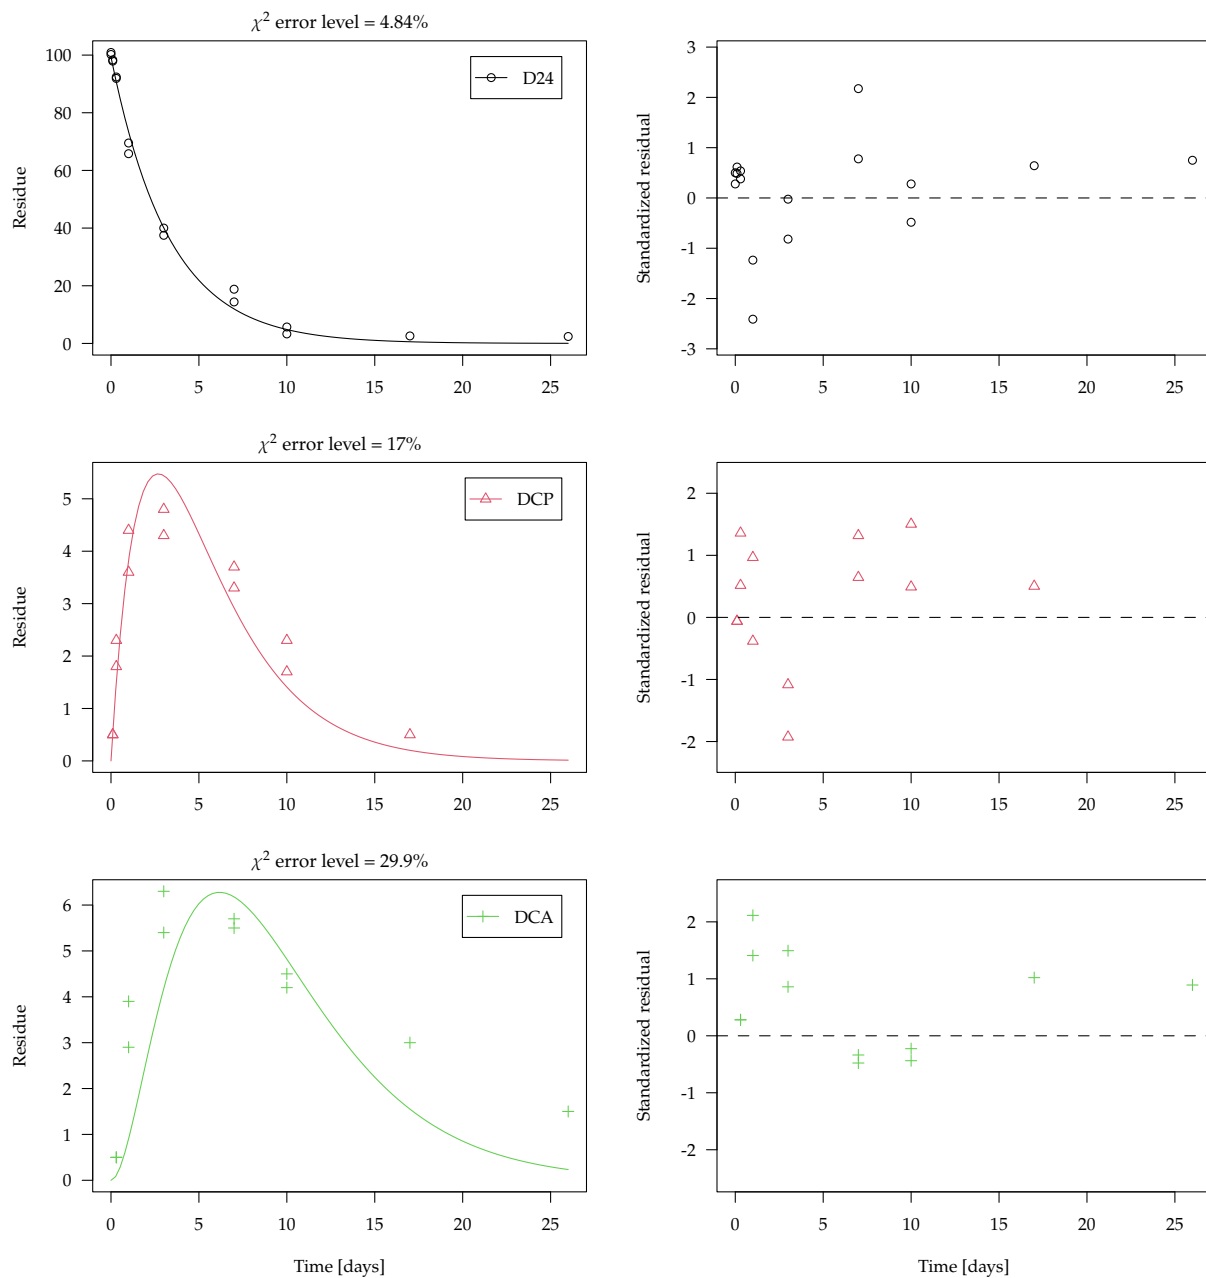

**Figure 45:** SFO-SFO(ns)-SFO fit for 2,4-D, Site E1

The AIC comparison suggests that the model without the pathway from DCP to sink fitted assuming variance by variable is the preferred variant for this dataset.

|                                   | df | AIC      |
|-----------------------------------|----|----------|
| f_d24_obs[["SFO-SFO-SFO", 4]]     | 9  | 165.9025 |
| f_d24_obs[["SFO-SFO(ns)-SFO", 4]] | 8  | 163.9025 |
| f_d24_tc[["SFO-SFO-SFO", 4]]      | 8  | 181.7071 |
| f_d24_tc[["SFO-SFO(ns)-SFO", 4]]  | 7  | 179.7071 |

The likelihood ratio test confirms that the “variance by variable” error model is preferable, but does not confirm that the model without the pathway from DCP to sink is preferable.

## Likelihood ratio test

Model 1: SF0-SF0-SF0 with error model obs and fixed parameter(s) DCP\_0, DCA\_0

Model 2: SF0-SF0-SF0 with error model tc and fixed parameter(s) DCP\_0, DCA\_0

|   | #Df | LogLik  | Df | Chisq  | Pr(>Chisq)    |
|---|-----|---------|----|--------|---------------|
| 1 | 9   | -73.951 |    |        |               |
| 2 | 8   | -82.854 | -1 | 17.805 | 2.448e-05 *** |

---

Signif. codes: 0 '\*\*\*' 0.001 '\*\*' 0.01 '\*' 0.05 '.' 0.1 ' ' 1

## Likelihood ratio test

Model 1: SF0-SF0-SF0 with error model obs and fixed parameter(s) DCP\_0, DCA\_0

Model 2: SF0-SF0(ns)-SF0 with error model obs and fixed parameter(s) DCP\_0, DCA\_0

|   | #Df | LogLik  | Df | Chisq | Pr(>Chisq) |
|---|-----|---------|----|-------|------------|
| 1 | 9   | -73.951 |    |       |            |
| 2 | 8   | -73.951 | -1 | 0     | 0.9999     |

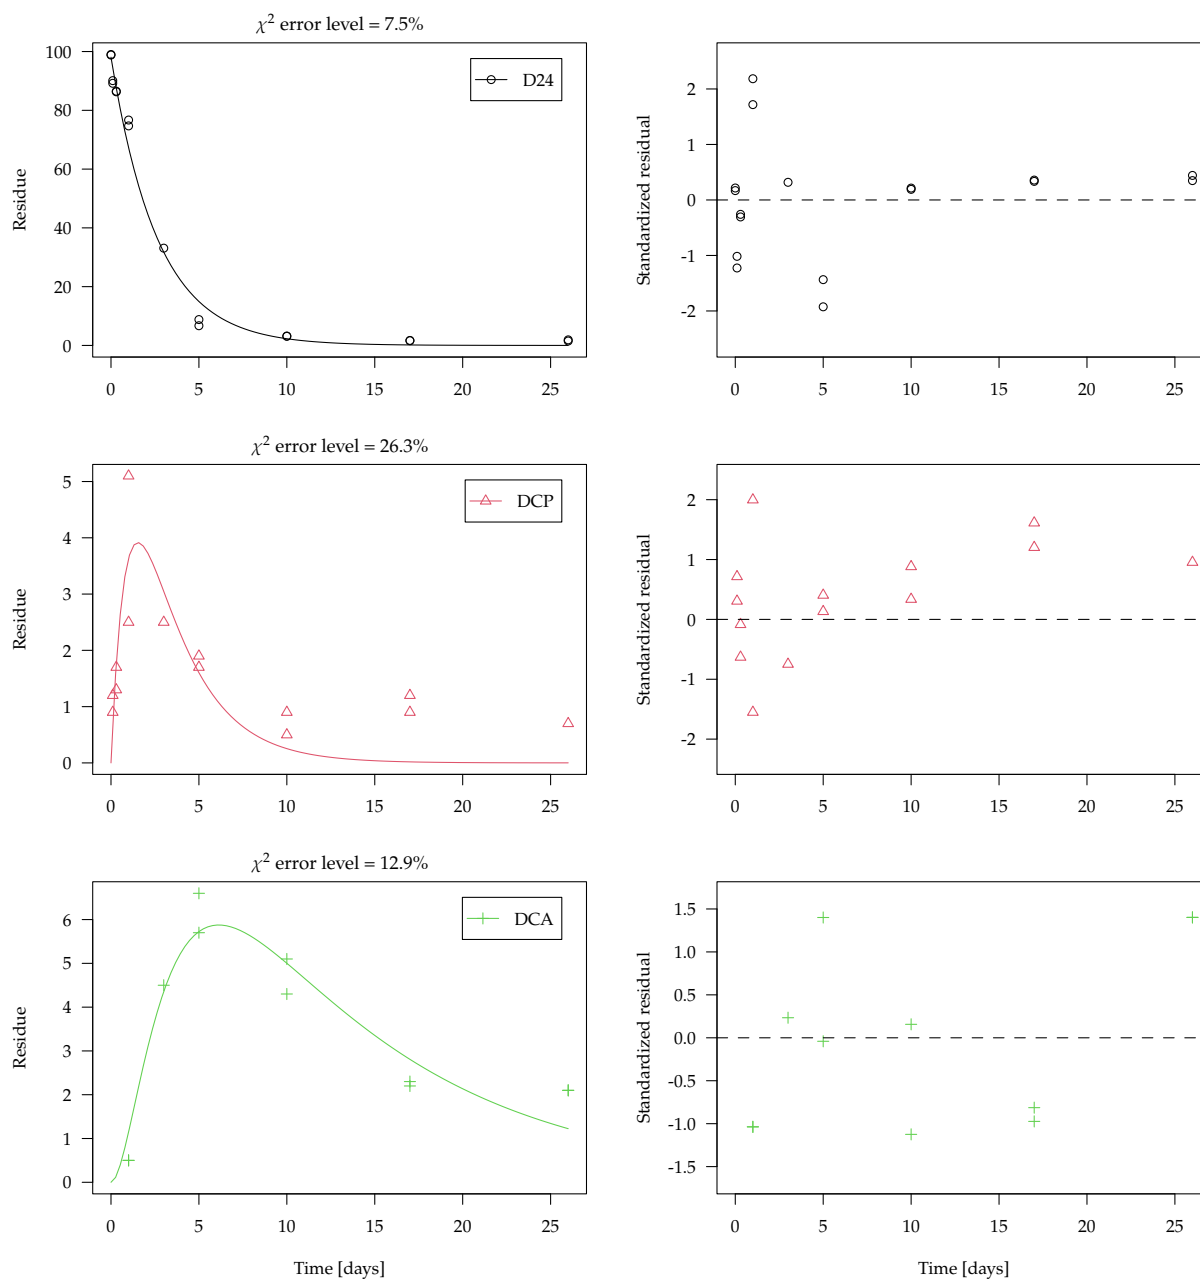

**Figure 46:** SFO-SFO-SFO fit for 2,4-D, Site I2

The fit for Site I2 46 looks visually acceptable for the parent and for DCA. For DCP, similar as in the case of dataset 3 (RefSol 03-G), a biphasic fit for the metabolite may be called for. Other than that, the parameter statistics do not indicate that the model would need to be simplified (Table 17).



**Table 17:** Model parameters with confidence intervals and p-values

| Model       | Name         | Unit            | Fitted parameters |           |         |        |
|-------------|--------------|-----------------|-------------------|-----------|---------|--------|
|             |              |                 | Estimate          | Pr(>t)    | Lower   | Upper  |
| SFO-SFO-SFO | D24_0        | % AR            | 98.08             | 1.039e-33 | 94.28   | 101.9  |
|             | k_D24        | d <sup>-1</sup> | 0.3761            | 1.644e-16 | 0.3281  | 0.4311 |
|             | k_DCP        | d <sup>-1</sup> | 1.041             | 7.164e-05 | 0.6486  | 1.672  |
|             | k_DCA        | d <sup>-1</sup> | 0.0934            | 4.275e-07 | 0.06669 | 0.1308 |
|             | f_D24_to_DCP | -               | 0.1966            | 8.339e-06 | 0.1289  | 0.2881 |
|             | f_DCP_to_DCA | -               | 0.4933            | 0.000108  | 0.2703  | 0.719  |
|             | sigma_D24    | % AR            | 4.289             | 8.015e-07 | 2.792   | 5.786  |
|             | sigma_DCP    | % AR            | 0.7327            | 3.959e-06 | 0.4507  | 1.015  |
|             | sigma_DCA    | % AR            | 0.6243            | 2.419e-05 | 0.3524  | 0.8962 |

The AIC comparison suggests that the model including the pathway from DCP to sink fitted assuming variance by variable is the preferred variant also for this dataset.

|                                   | df | AIC      |
|-----------------------------------|----|----------|
| f_d24_obs[["SFO-SFO-SFO", 5]]     | 9  | 167.6242 |
| f_d24_obs[["SFO-SFO(ns)-SFO", 5]] | 8  | 172.2067 |
| f_d24_tc[["SFO-SFO-SFO", 5]]      | 8  | 183.2611 |
| f_d24_tc[["SFO-SFO(ns)-SFO", 5]]  | 7  | 183.6597 |

The likelihood ratio test confirms that the “variance by variable” error model is preferable, and that the sink from DCP to sink should be used in the model.

## Likelihood ratio test

Model 1: SF0-SF0-SF0 with error model obs and fixed parameter(s) DCP\_0, DCA\_0

Model 2: SF0-SF0-SF0 with error model tc and fixed parameter(s) DCP\_0, DCA\_0

|   | #Df | LogLik  | Df | Chisq  | Pr(>Chisq)    |
|---|-----|---------|----|--------|---------------|
| 1 | 9   | -74.812 |    |        |               |
| 2 | 8   | -83.631 | -1 | 17.637 | 2.674e-05 *** |

---

Signif. codes: 0 '\*\*\*' 0.001 '\*\*' 0.01 '\*' 0.05 '.' 0.1 ' ' 1

## Likelihood ratio test

Model 1: SF0-SF0-SF0 with error model obs and fixed parameter(s) DCP\_0, DCA\_0

Model 2: SF0-SF0(ns)-SF0 with error model obs and fixed parameter(s) DCP\_0, DCA\_0

|   | #Df | LogLik  | Df | Chisq  | Pr(>Chisq) |
|---|-----|---------|----|--------|------------|
| 1 | 9   | -74.812 |    |        |            |
| 2 | 8   | -78.103 | -1 | 6.5825 | 0.0103 *   |

---

Signif. codes: 0 '\*\*\*' 0.001 '\*\*' 0.01 '\*' 0.05 '.' 0.1 ' ' 1

## Simultaneous pathway fits

Fitting the SFO-SFO-SFO model with nlme is possible in several variants. The only variant that converges without adapting the control parameters is the variant without the pathway from DCP to sink and assuming constant error. When using either the variance by variable error model or the two-component error model, convergence can be obtained for the same degradation model by increasing the number of iterations in the Partial Nonlinear Least Squares step (PNLS step), and increasing the overall convergence tolerance. The same adaptations also make it possible to fit the full degradation model with two-component error.

The AIC values and the likelihood ratio tests indicate that out of the converged fits, the reduced degradation model combined with the variance by variable error model performs best (f\_d24\_2\_nlme\_obs).

|                    | Model   | df | AIC      | BIC       | logLik    | Test   | L.Ratio   |
|--------------------|---------|----|----------|-----------|-----------|--------|-----------|
| f_d24_2_nlme_const | 1       | 11 | 989.4115 | 1024.0977 | -483.7058 |        |           |
| f_d24_2_nlme_obs   | 2       | 13 | 883.8171 | 924.8099  | -428.9086 | 1 vs 2 | 109.59436 |
| f_d24_nlme_tc      | 3       | 14 | 923.7541 | 967.9002  | -447.8771 | 2 vs 3 | 37.93698  |
| f_d24_2_nlme_tc    | 4       | 12 | 916.2860 | 954.1254  | -446.1430 | 3 vs 4 | 3.46818   |
|                    | p-value |    |          |           |           |        |           |
| f_d24_2_nlme_const |         |    |          |           |           |        |           |
| f_d24_2_nlme_obs   | <.0001  |    |          |           |           |        |           |
| f_d24_nlme_tc      | <.0001  |    |          |           |           |        |           |
| f_d24_2_nlme_tc    | 0.1766  |    |          |           |           |        |           |

Plots for the reduced model assuming constant variance (Figure 47), variance by variable (Figure 48) and two-component error (Figure 49) are shown below.

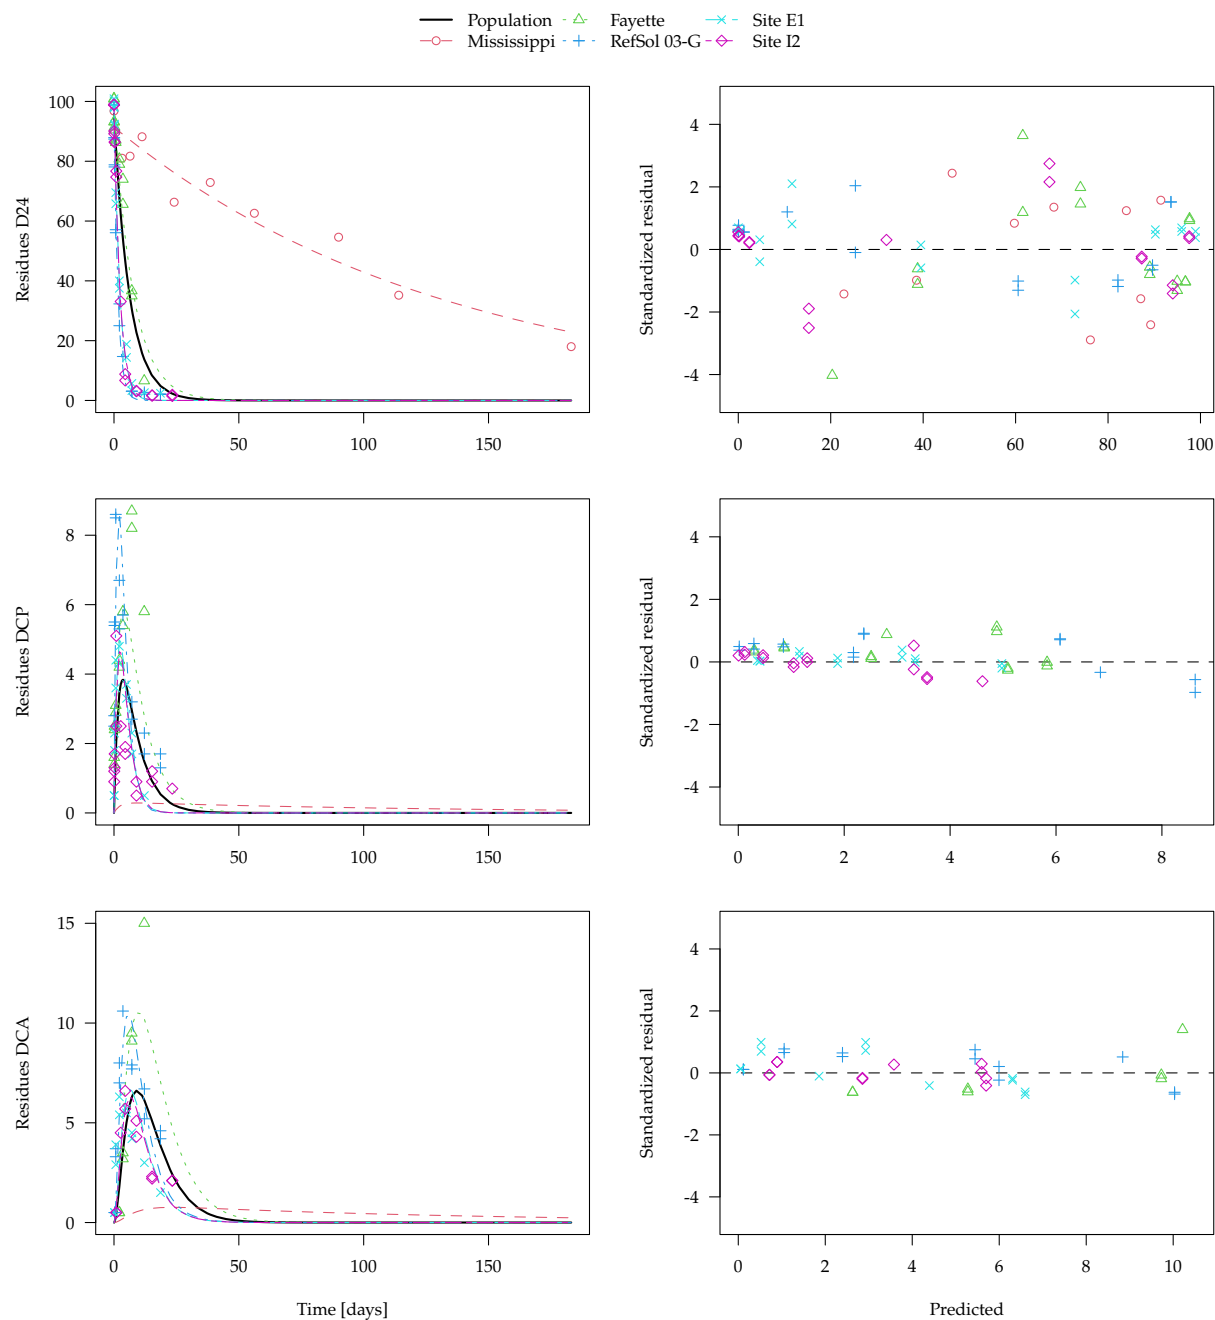

Figure 47: SFO-SFO(ns)-SFO fitted using nlme assuming constant error

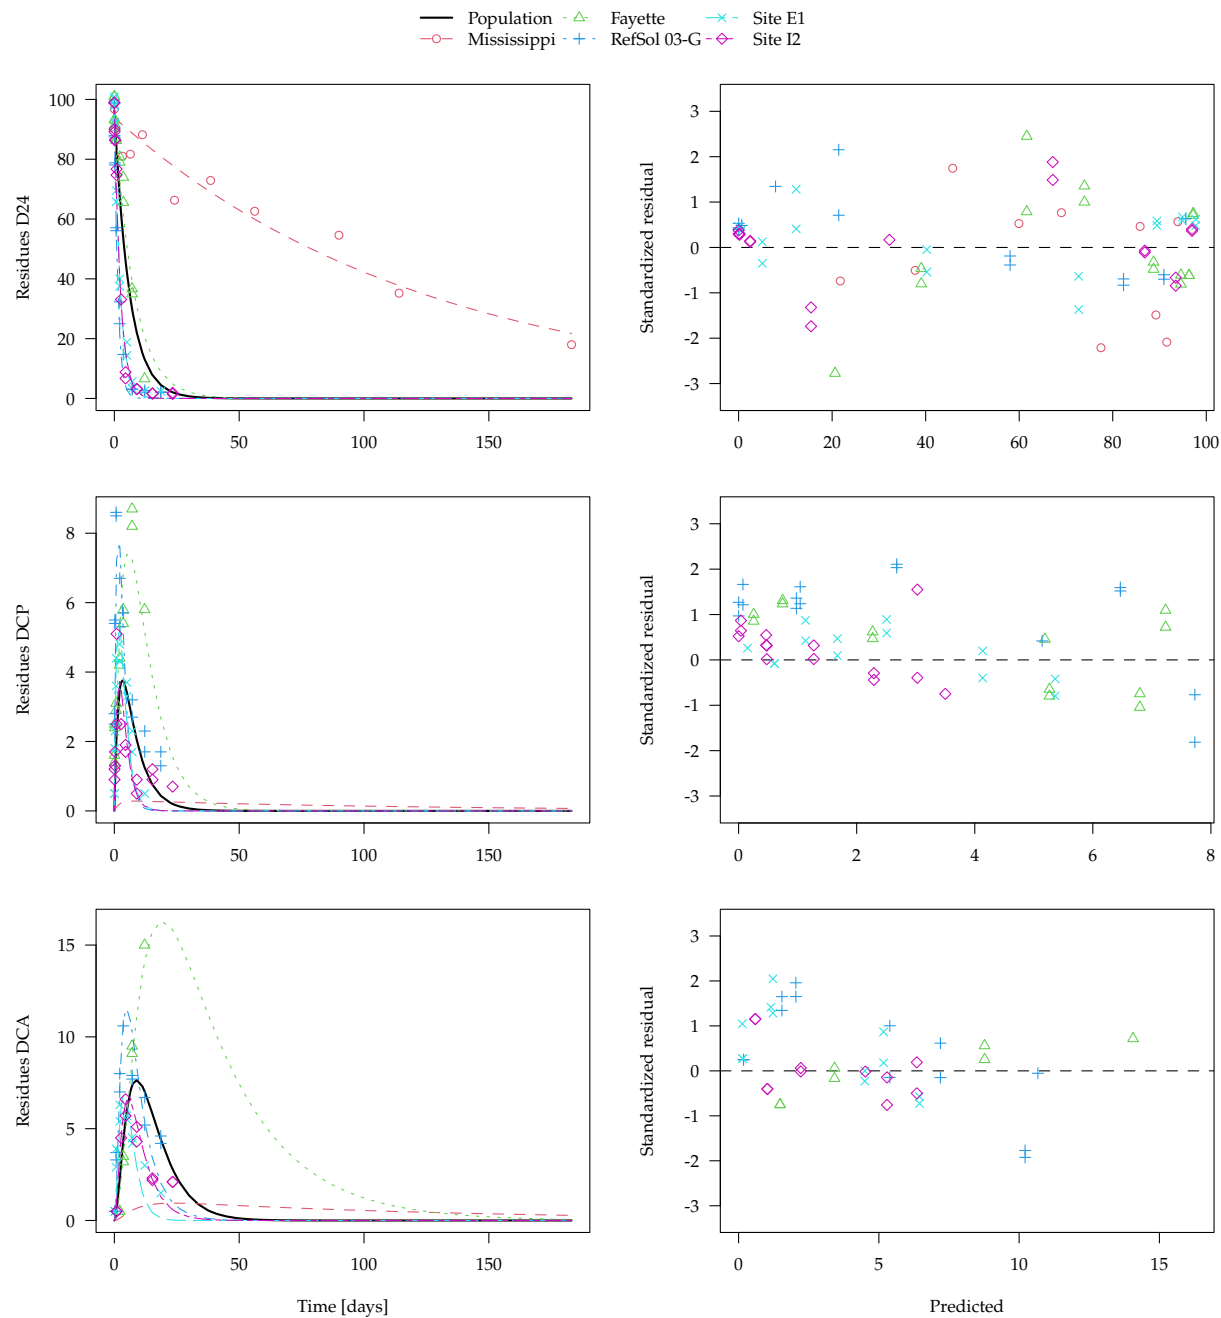

Figure 48: SFO-SFO-SFO(ns) fitted using nlme assuming variance by variable

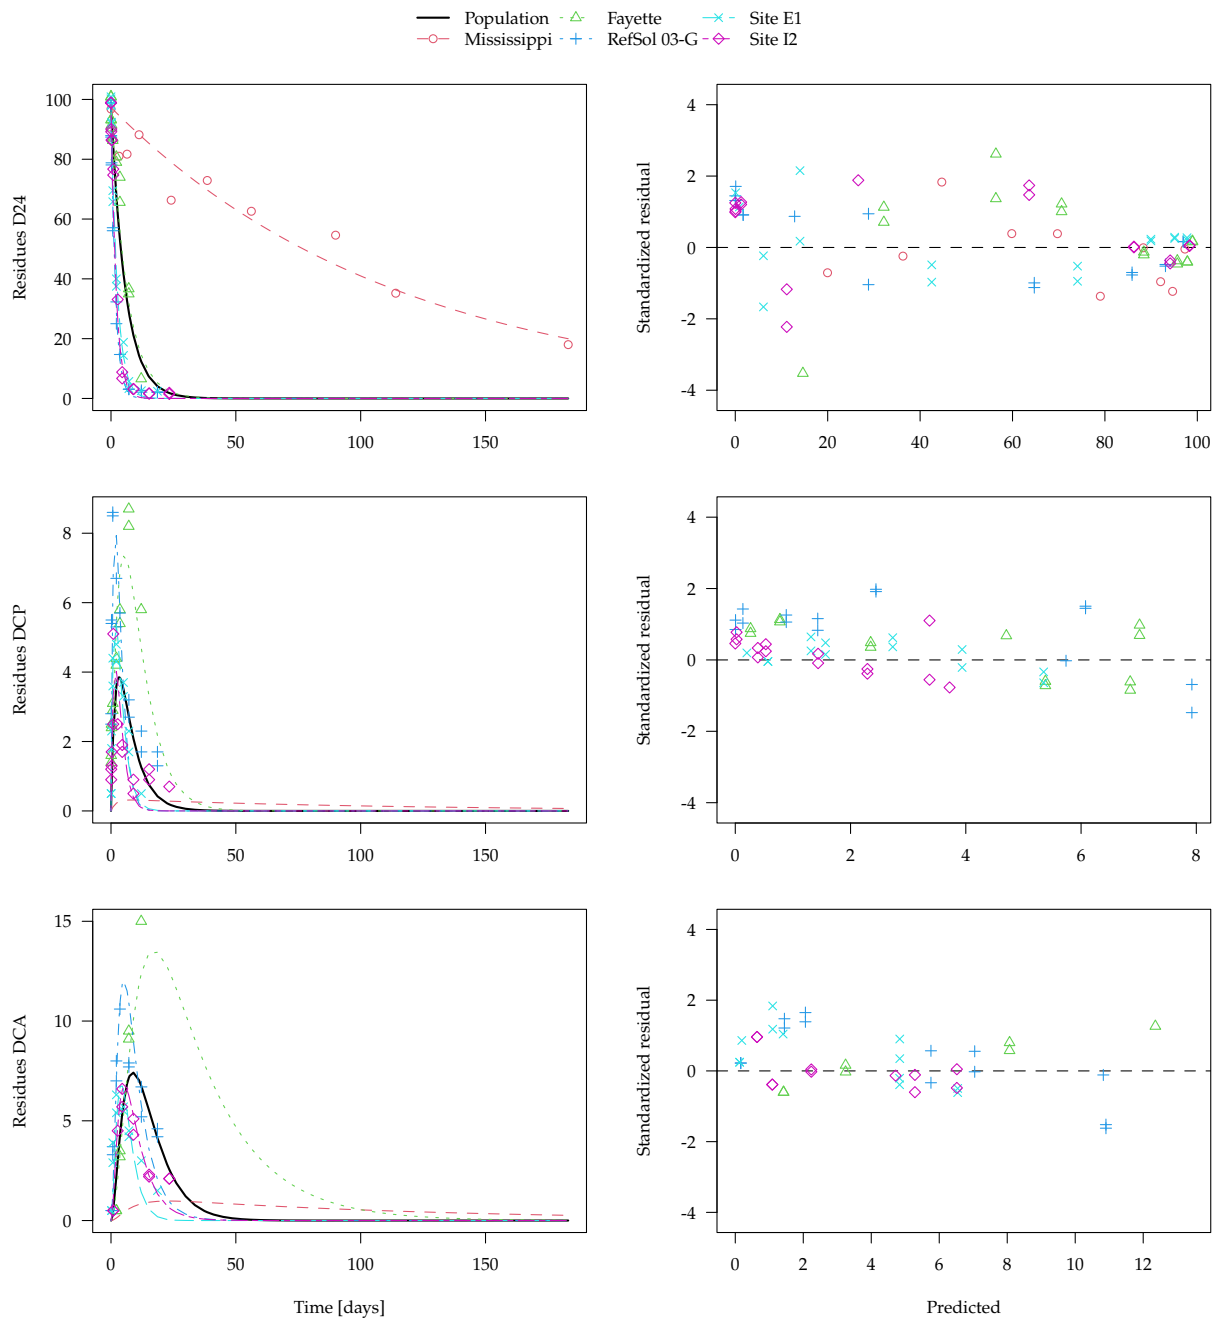

**Figure 49:** SFO-SFO(ns)-SFO fitted using nlme assuming two-component error

It is currently a bit time consuming to fit these degradation models using saemix, as analytical solutions have not been implemented for this degradation model. Each fit takes about 10 minutes to complete.

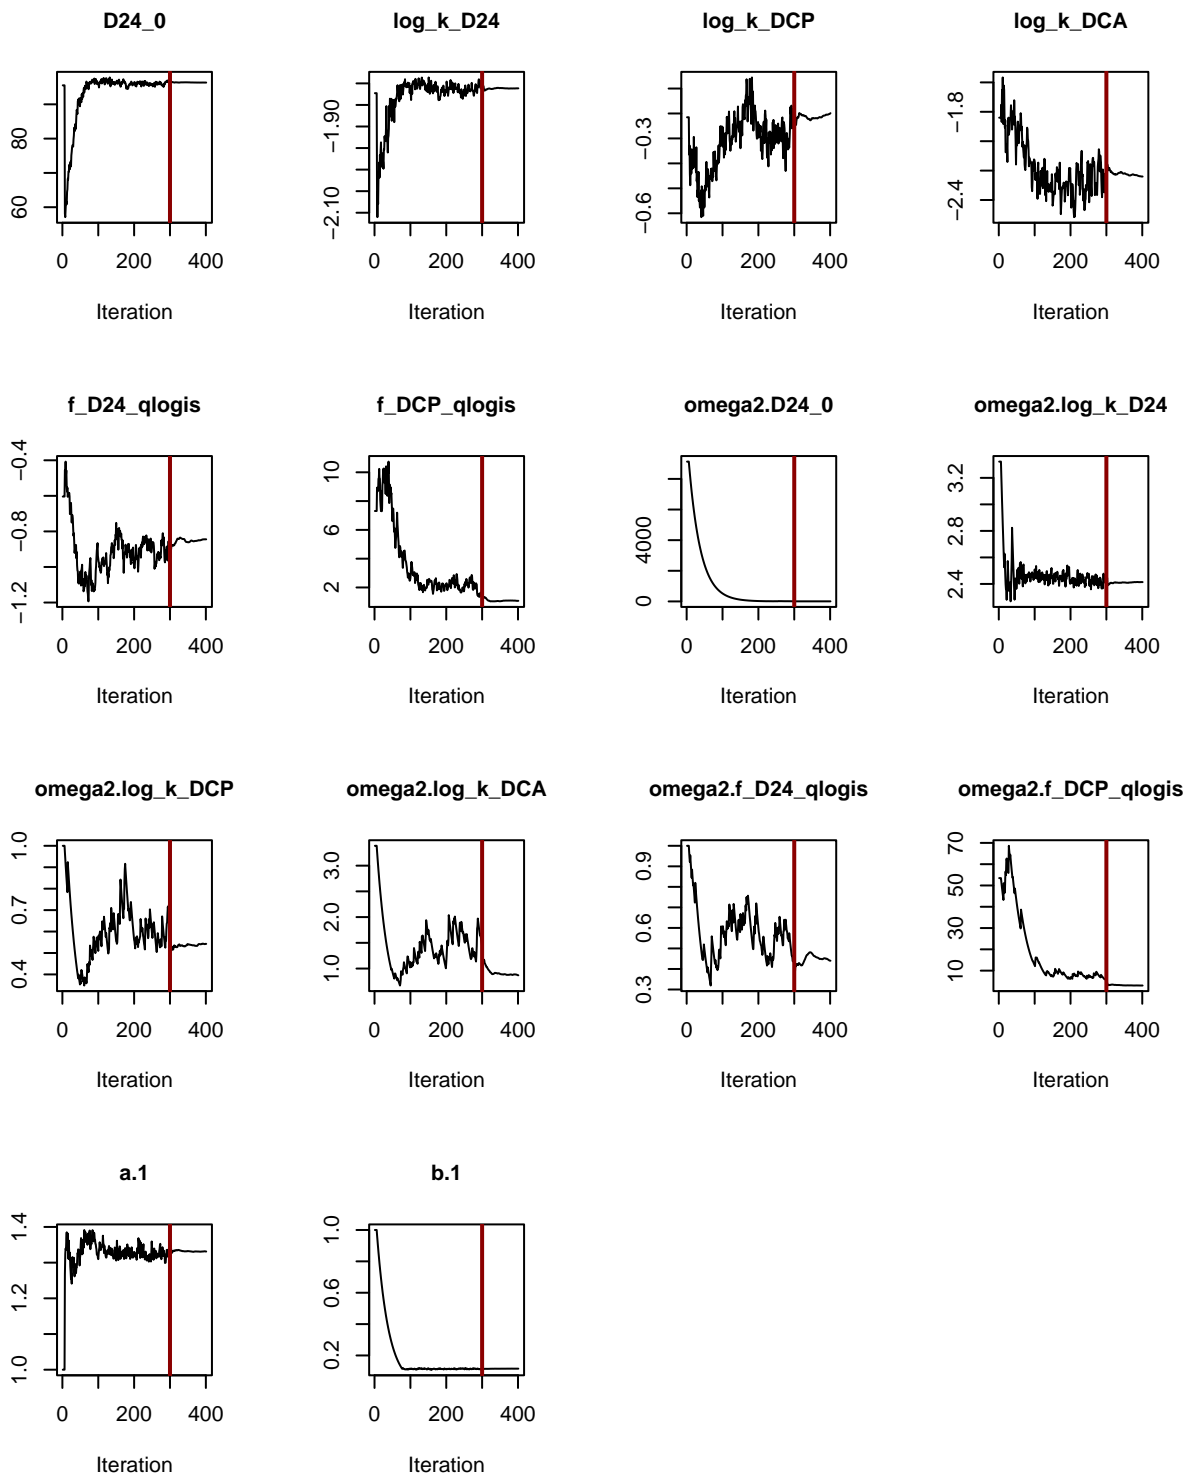

**Figure 50:** Convergence plot for SFO-SFO-SFO fitted using saemix assuming two-component error

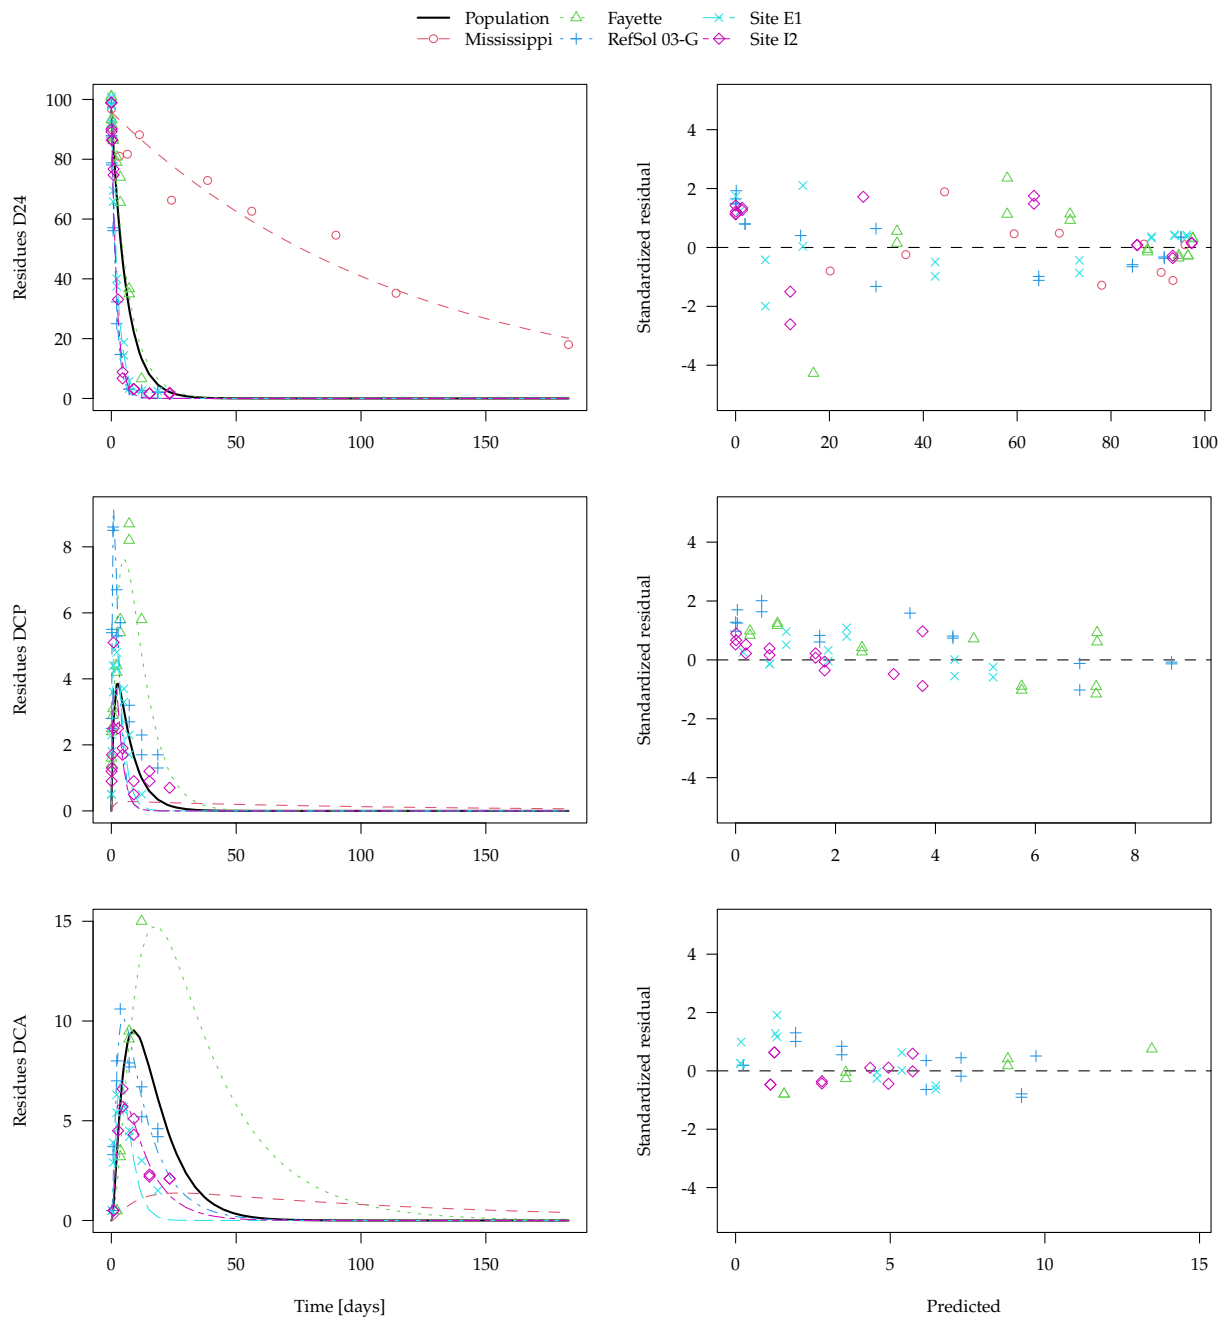

**Figure 51:** SFO-SFO-SFO fitted using saemix assuming two-component error

As only data for the Mississippi soil contain observations at later sampling times, the plot shown in Figure 51 is repeated below with the x axis limited to 30 normalised days.



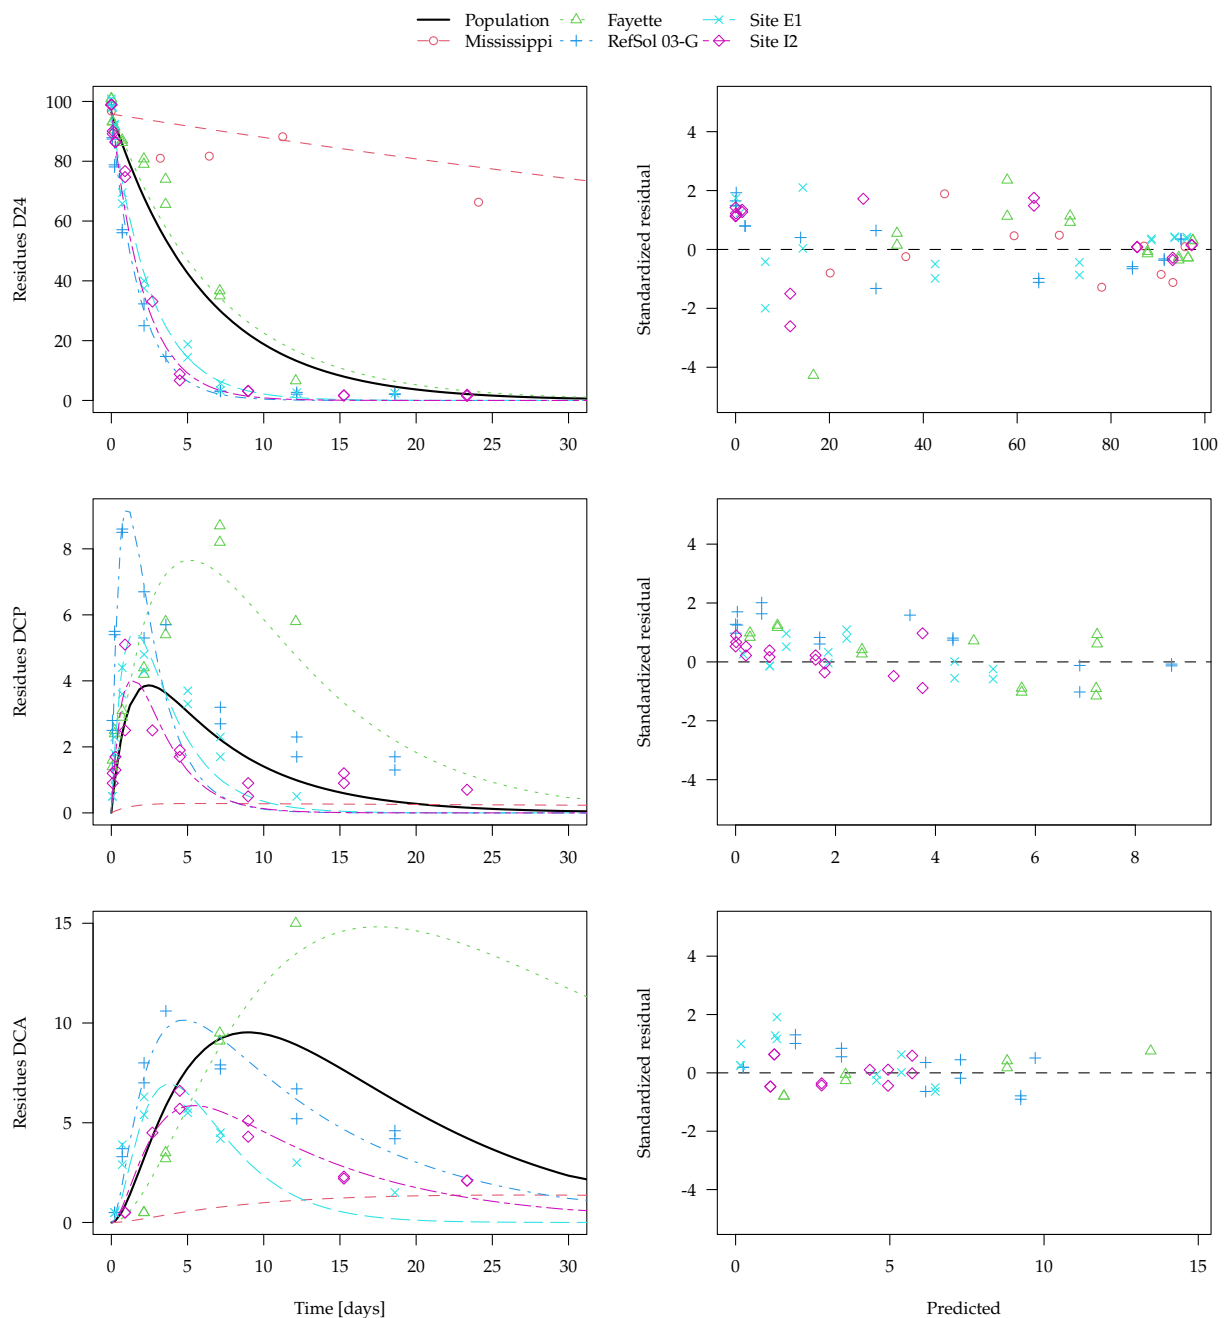

**Figure 52:** SFO-SFO-SFO fitted using saemix assuming two-component error

In addition to this fit with the full degradation model, saemix fits with the reduced model, without the pathway from DCP to sink, are shown. Convergence plots and summary plots for the fits using the two available error models (constant and two-component error) are shown below. As the parent data in the Mississippi soil are always fitted well, the following plots only show the first 30 normalised days.

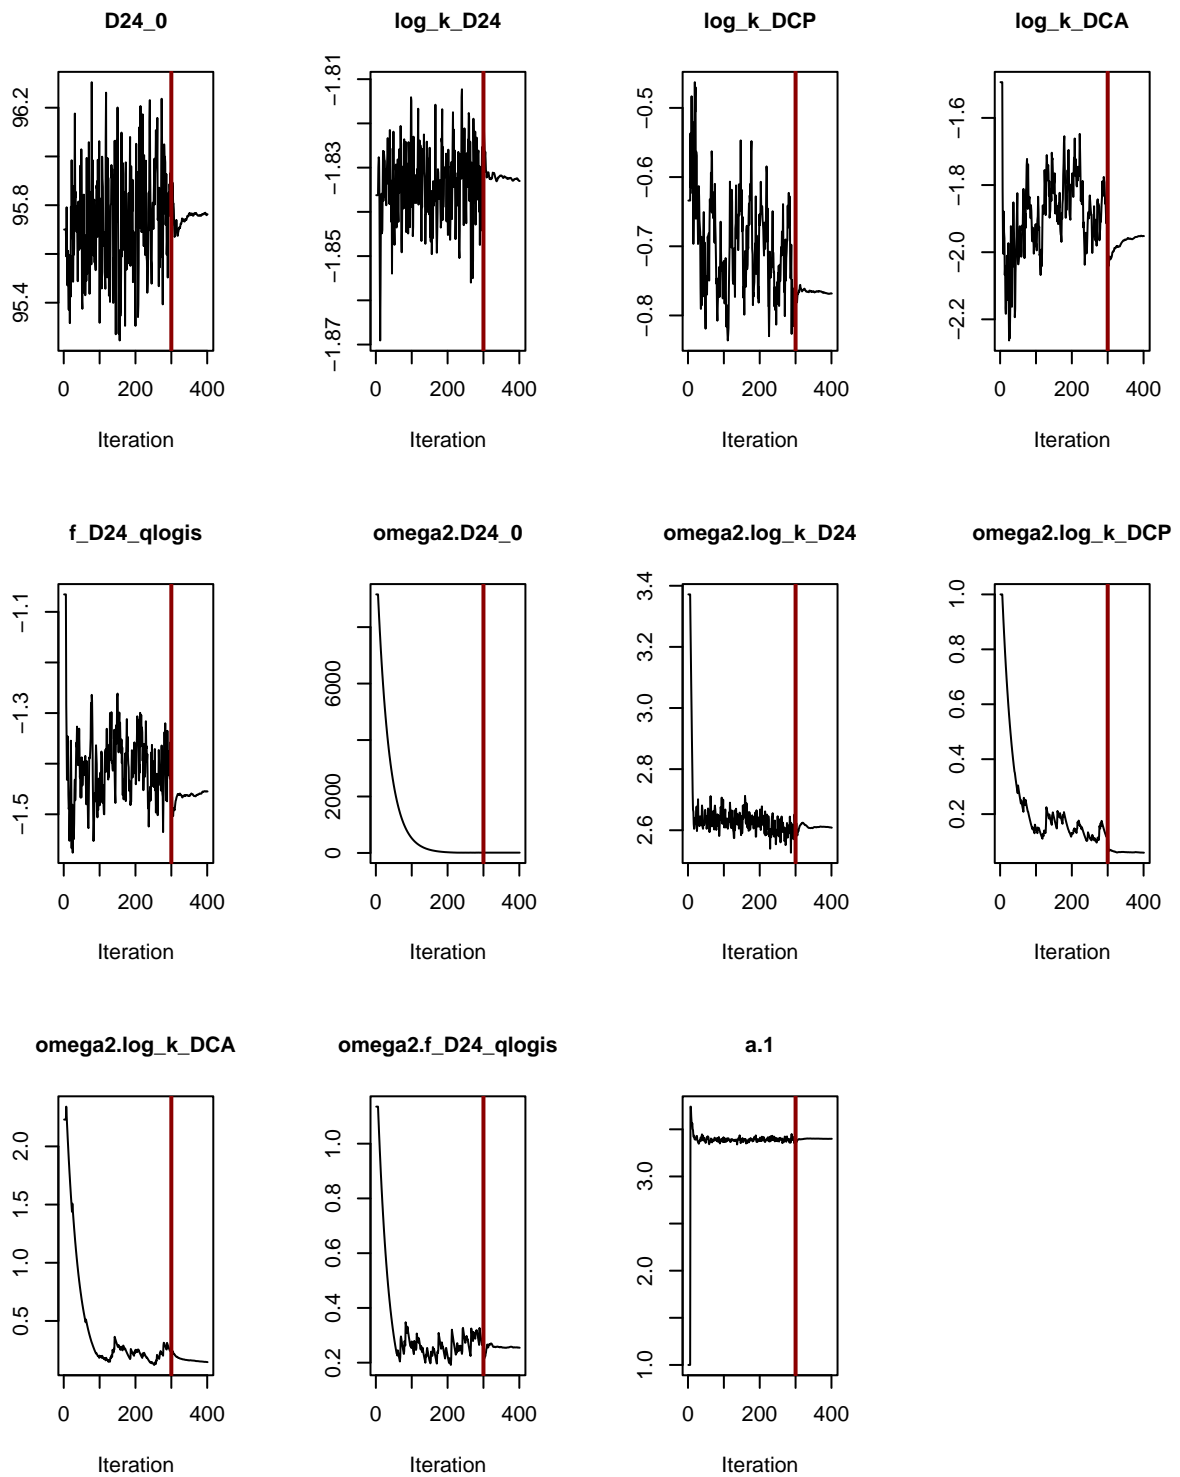

**Figure 53:** Convergence plot for SFO-SFO(ns)-SFO fitted using saemix assuming constant error

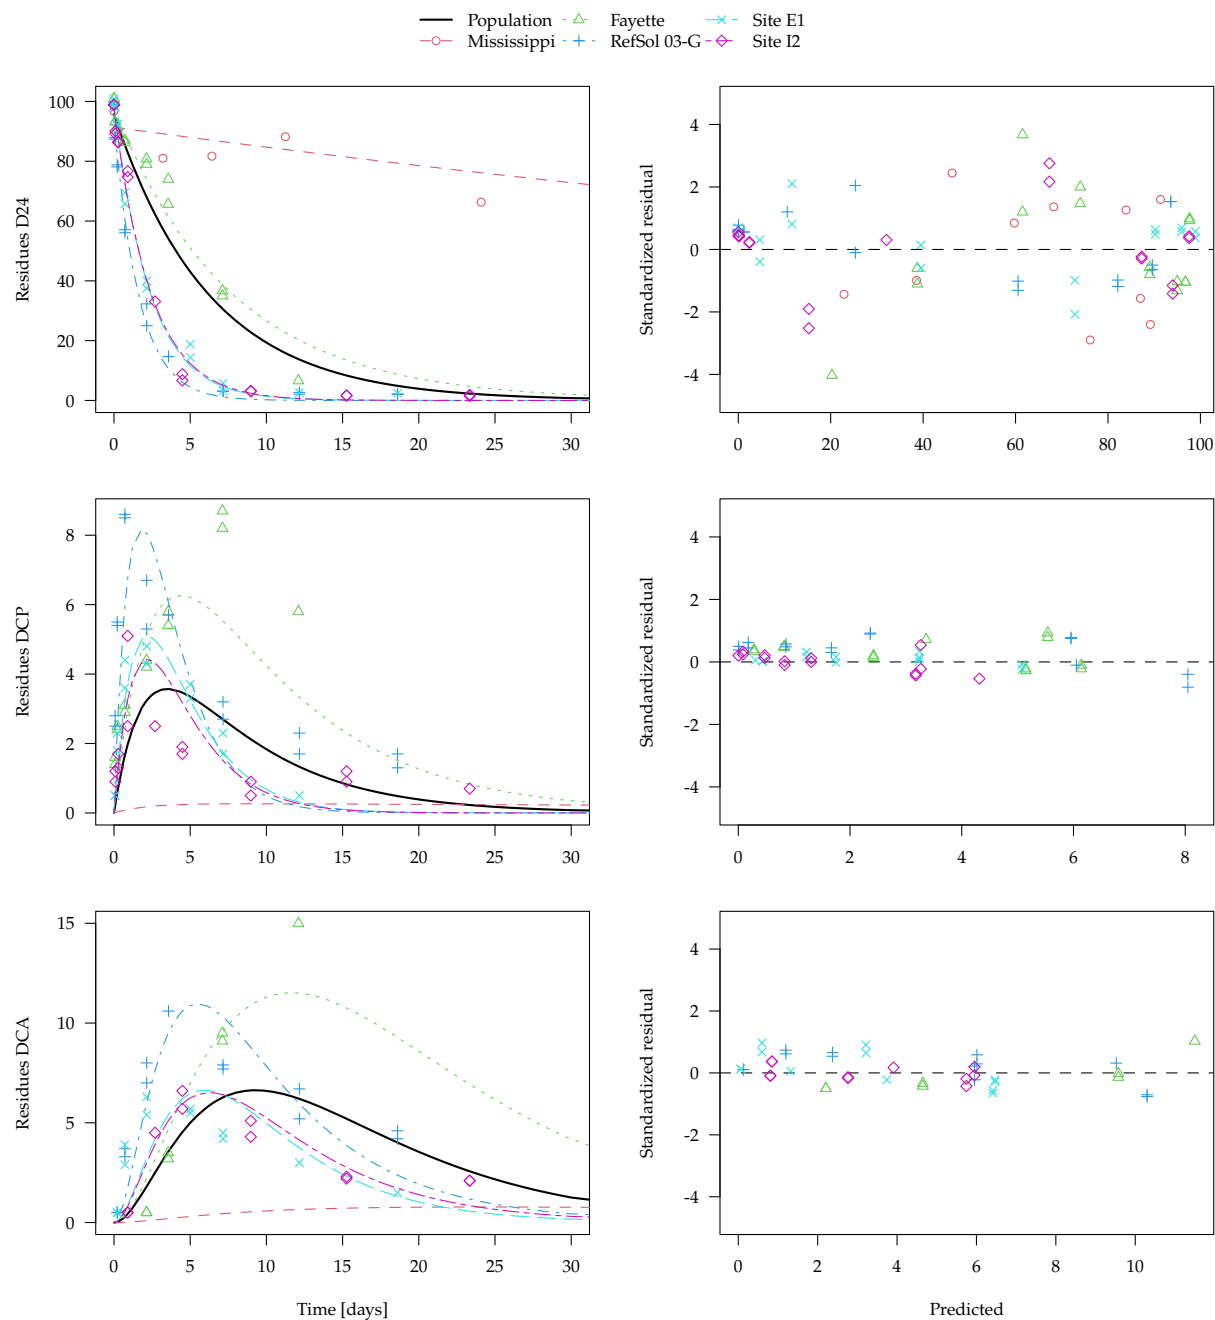

Figure 54: SFO-SFO(ns)-SFO fitted using saemix assuming constant error

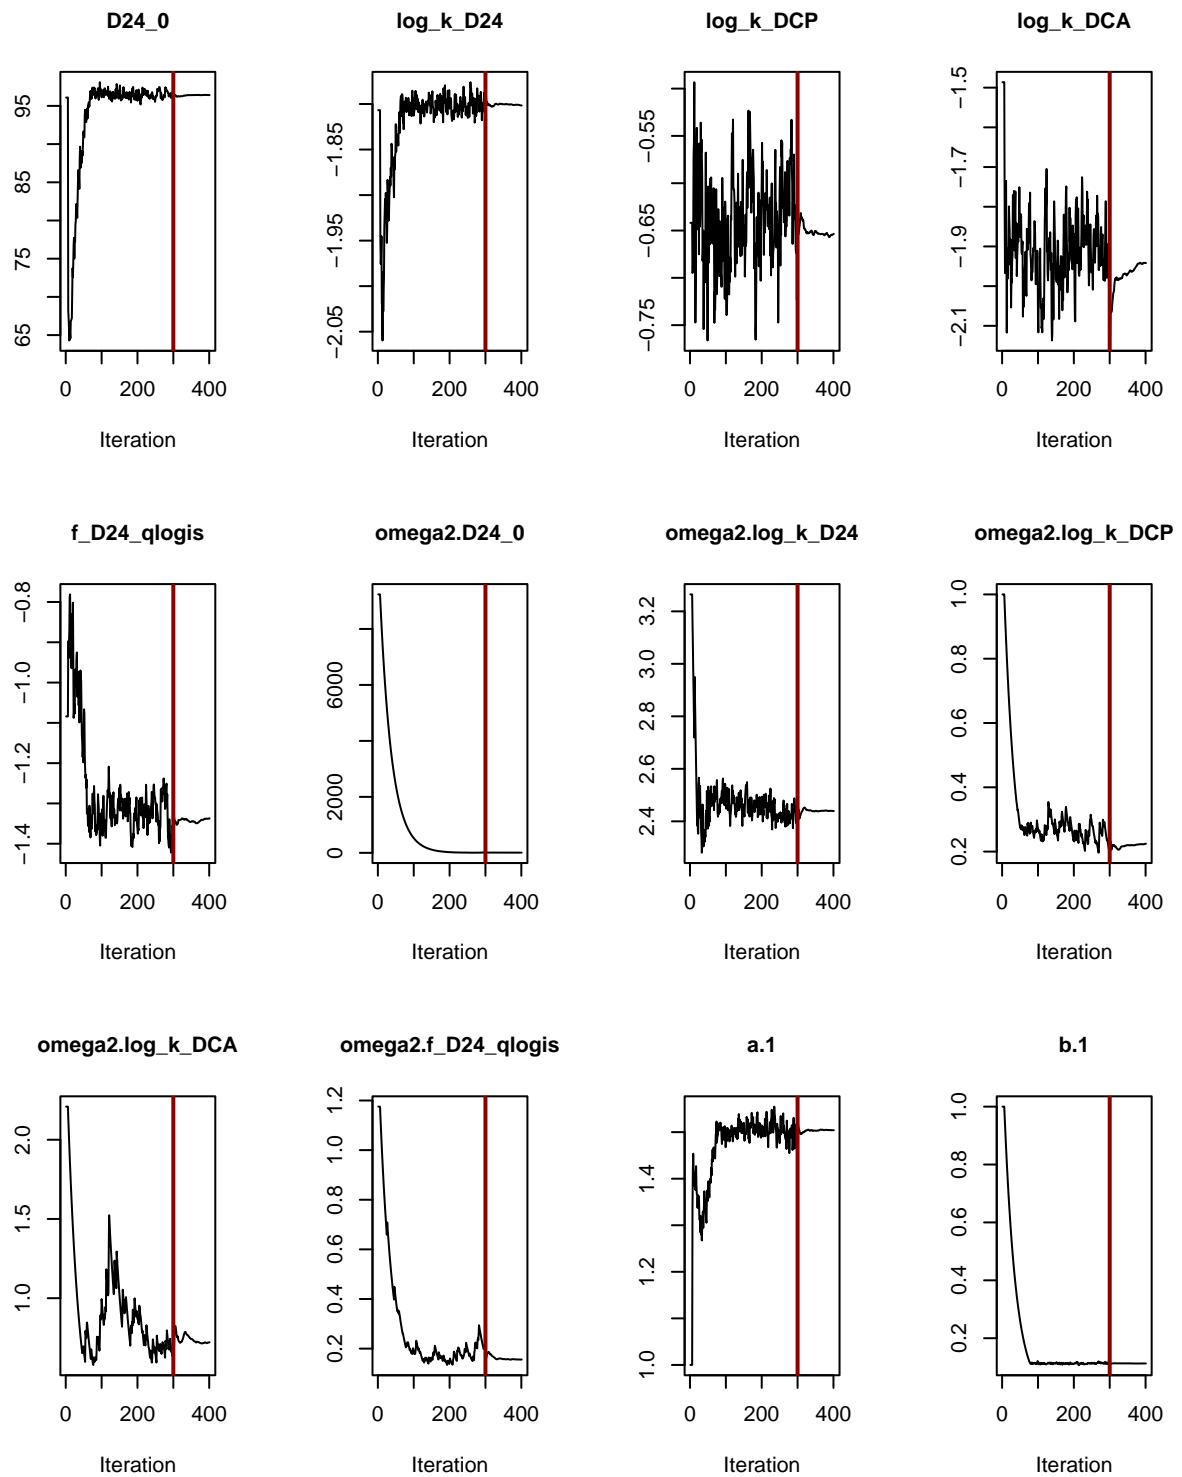

**Figure 55:** Convergence plot for SFO-SFO(ns)-SFO fitted using saemix assuming two-component error

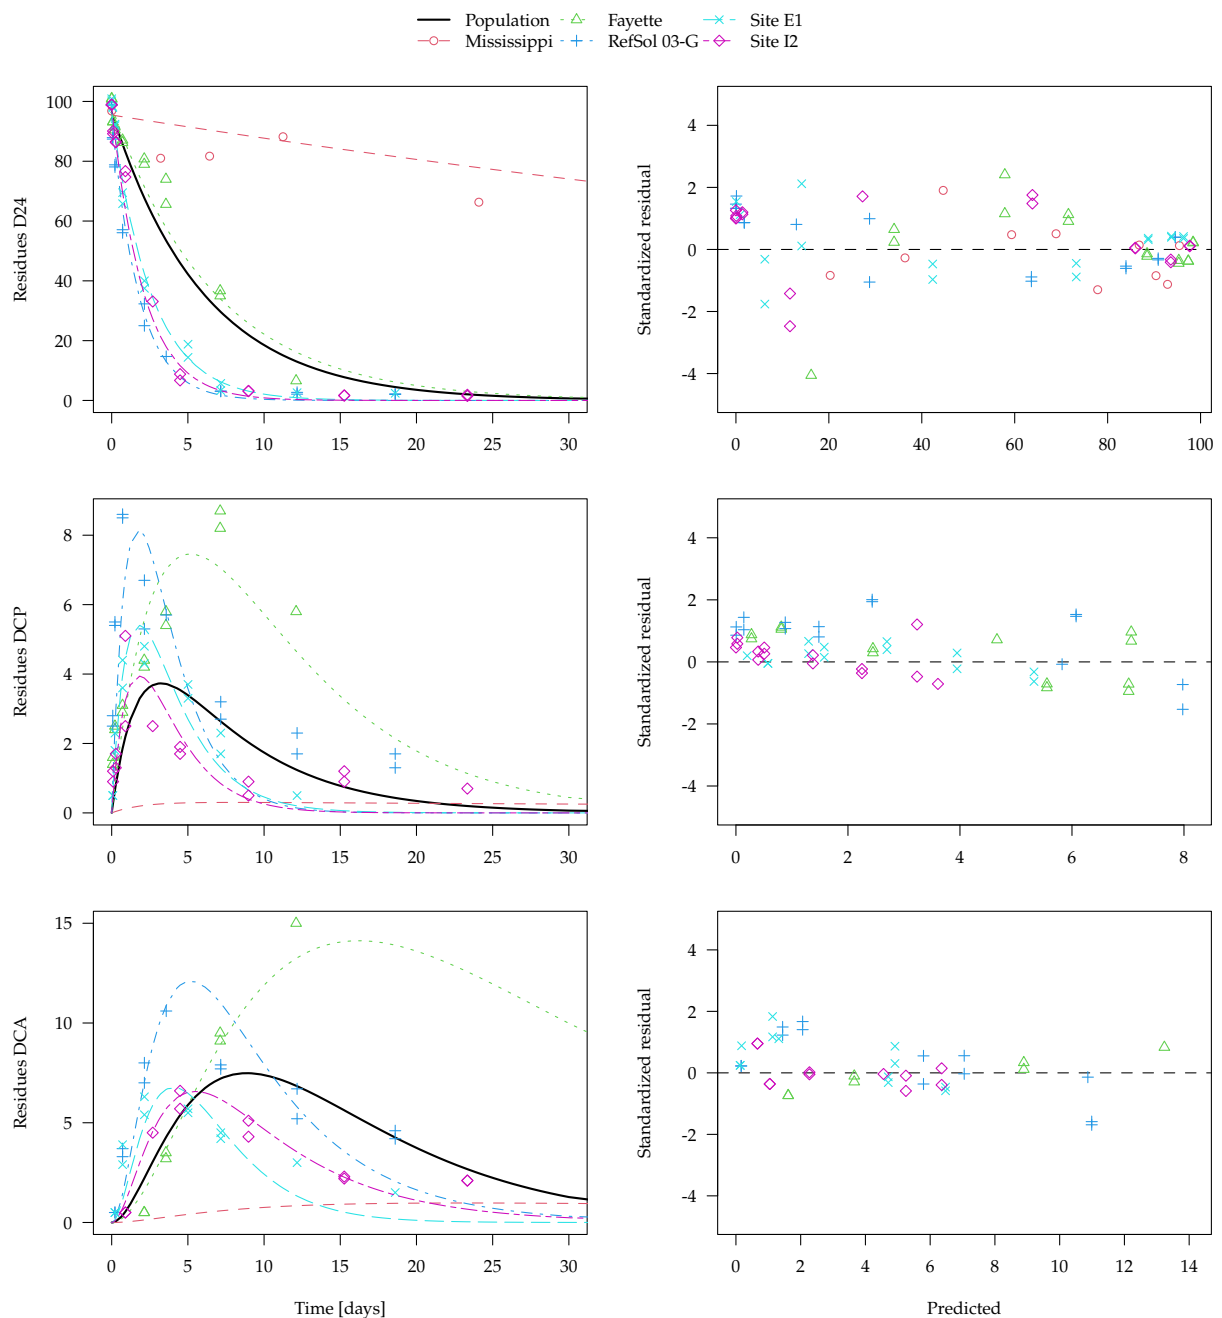

**Figure 56:** SFO-SFO(ns)-SFO fitted using saemix assuming two-component error

The comparison of these three saemix variants indicates that fit of the full model combined with the two-component error model (first line) is preferable over the variants with the reduced degradation model.

Likelihoods calculated by importance sampling

|   | AIC      | BIC      |
|---|----------|----------|
| 1 | 907.5369 | 902.0690 |
| 2 | 989.7640 | 985.4678 |
| 3 | 913.3274 | 908.6406 |

## Check of transformations

tikz output  
2

tikz output  
2

## Endpoint comparisons

The non-normalised endpoints obtained in the separate fits are shown in Table 18, together with arithmetic mean formation fractions. Normalised DT<sub>50</sub> values for modelling are shown in Table 19, together with their geometric mean values.

**Table 18:** Non-normalised endpoints for modelling as obtained in the separate fits to the data

| Soil                   | 2,4-D                   |                  | DCP                     |                     | DCA                     |
|------------------------|-------------------------|------------------|-------------------------|---------------------|-------------------------|
|                        | DT <sub>50</sub><br>[d] | ff to DCP<br>[-] | DT <sub>50</sub><br>[d] | ff to DCA<br>[-]    | DT <sub>50</sub><br>[d] |
| Mississippi            | 58.867                  |                  |                         |                     |                         |
| Fayette                | 7.640                   | 0.2889           | 4.3634                  | 0.2889              | 59.439 <sup>a</sup>     |
| RefSol 03-G            | 1.625                   | 0.7482           | 0.3227                  | 1.0000 <sup>b</sup> | 13.142                  |
| Site E1                | 2.291                   | 0.1855           | 1.5364                  | 0.1855              | 2.772                   |
| Site I2                | 1.843                   | 0.1966           | 0.6657                  | 1.0000 <sup>b</sup> | 7.421                   |
| <b>Arithmetic mean</b> |                         | <b>0.355</b>     |                         | <b>0.619</b>        |                         |

ff: Formation fraction

<sup>a</sup> Based on a non-significant rate constant

<sup>b</sup> Pathway from DCP to sink was negligible

**Table 19:** Normalised modelling DT<sub>50</sub> values as obtained in the separate fits to the data

| Soil                  | 2,4-D<br>[d] | DCP<br>[d]   | DCA<br>[d]          |
|-----------------------|--------------|--------------|---------------------|
| Mississippi           | 94.555       |              |                     |
| Fayette               | 5.439        | 3.1062       | 42.313 <sup>a</sup> |
| RefSol 03-G           | 1.163        | 0.2309       | 9.405               |
| Site E1               | 1.640        | 1.0995       | 1.983               |
| Site I2               | 1.654        | 0.5976       | 6.662               |
| <b>Geometric mean</b> | <b>4.39</b>  | <b>0.829</b> | <b>8.52</b>         |

<sup>a</sup> Based on a non-significant rate constant

**Table 20:** Modelling endpoints derived from mixed effects models fitted to the pathway

| Algorithm | 2,4-D                   |                  | DCP                     |                  | DCA                     |
|-----------|-------------------------|------------------|-------------------------|------------------|-------------------------|
|           | DT <sub>50</sub><br>[d] | ff to DCP<br>[-] | DT <sub>50</sub><br>[d] | ff to DCA<br>[-] | DT <sub>50</sub><br>[d] |
| nlme      | 4.213                   | 0.211            | 1.325                   | 1.000            | 4.933                   |
| saemix    | 4.200                   | 0.208            | 1.332                   | 1.000            | 4.834                   |

ff: Formation fraction

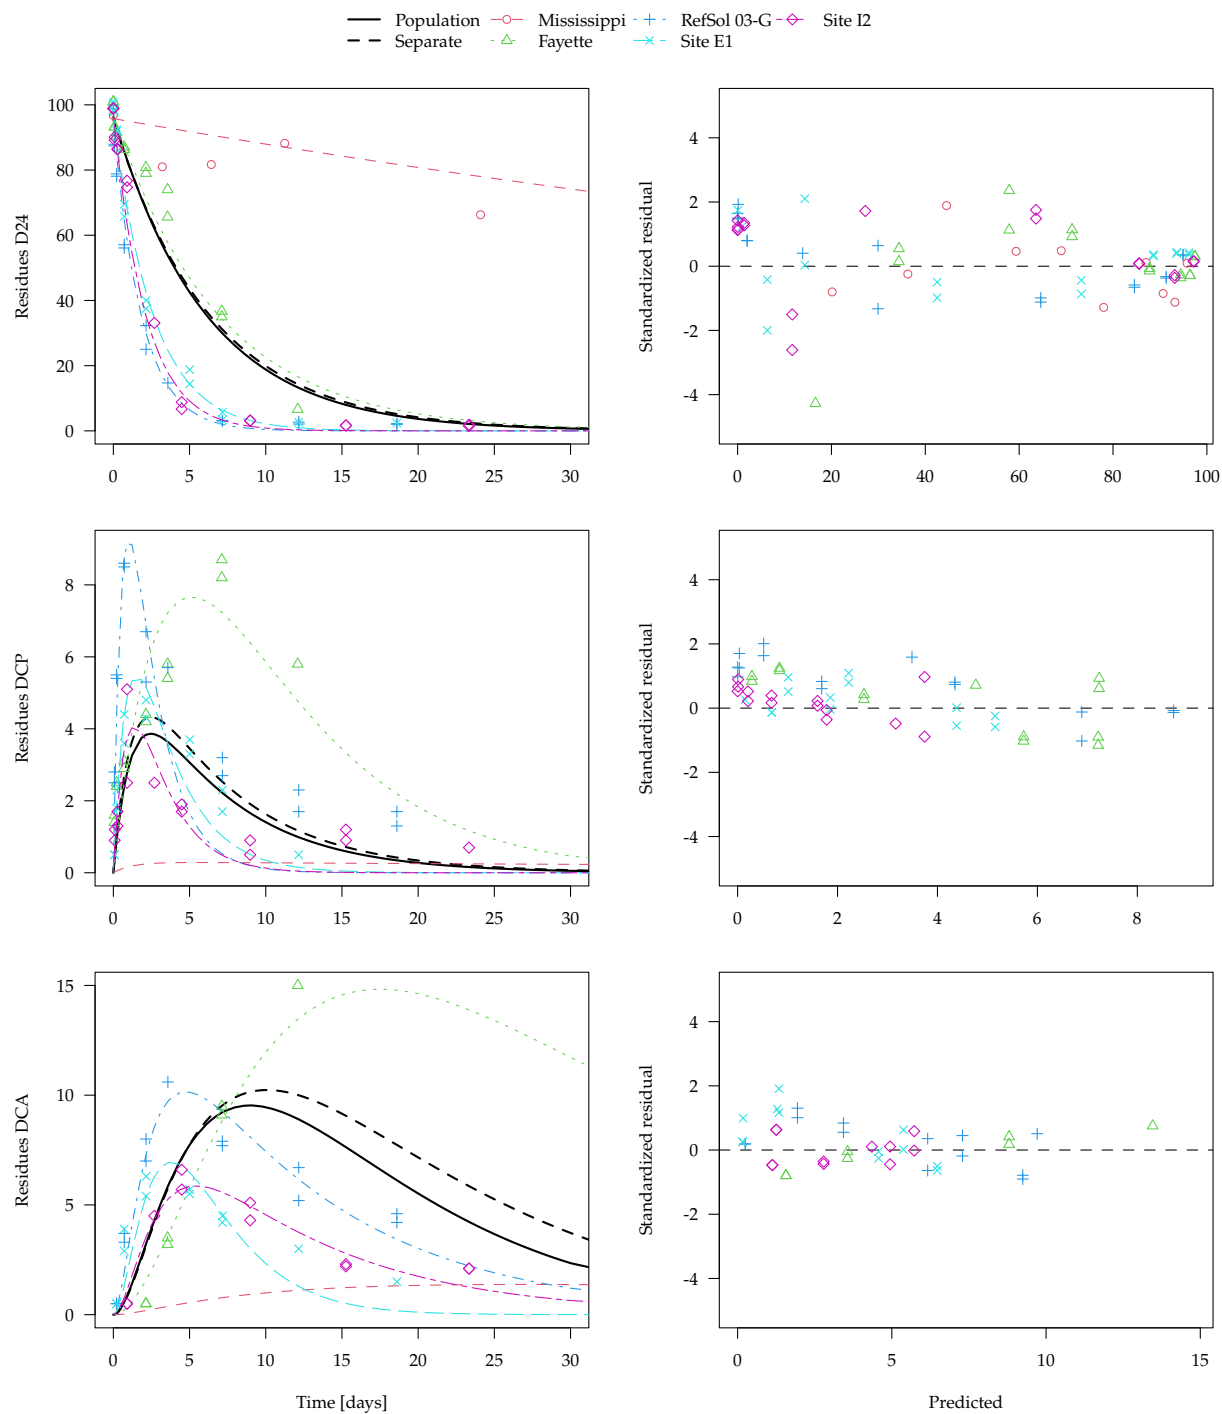

Figure 57: Overlay of degradation curves derived from separate fits and the best saemix fit, first 30 days



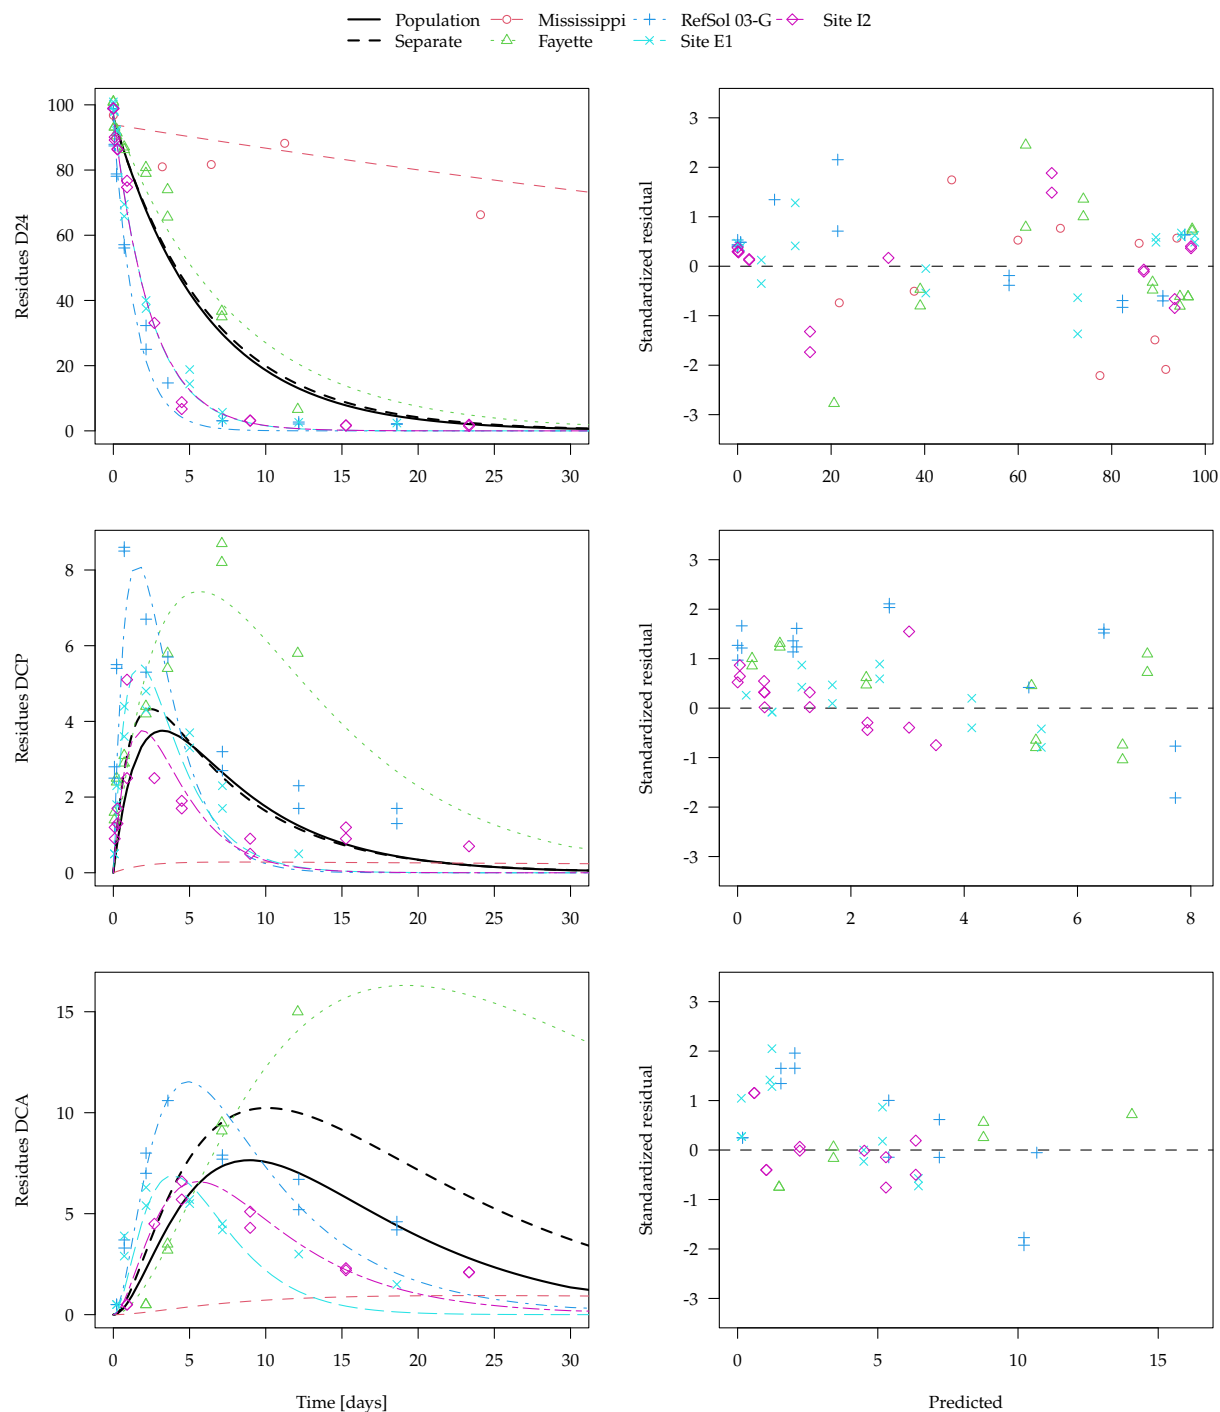

**Figure 58:** Overlay of degradation curves derived from separate fits and the best nlme fit, first 30 days

## EU risk assessment of dimethenamid-P from 2018

In this section, the aerobic soil degradation data on dimethenamid as documented in the Review Assessment Report of the European Union pesticide risk assessment peer review for dimethenamid-P from 2018 are evaluated (EFSA, 2018).

The data are used as available from the `mk` package. The dataset in the package already contains normalisation factors for time step normalisation to reference conditions. The following code shows how the data from the package is preprocessed for this analysis.

```
dmta_ds <- lapply(1:8, function(i) {  
  ds_i <- dimethenamid_2018$ds[[i]]$data  
  ds_i[ds_i$name == "DMTAP", "name"] <- "DMTA"  
  ds_i$time <- ds_i$time * dimethenamid_2018$f_time_norm[i]  
  ds_i  
})  
names(dmta_ds) <- sapply(dimethenamid_2018$ds, function(ds) ds$title)  
dmta_ds[["Borstel"]] <- rbind(dmta_ds[["Borstel 1"]], dmta_ds[["Borstel 2"]])  
dmta_ds[["Borstel 1"]] <- NULL  
dmta_ds[["Borstel 2"]] <- NULL  
dmta_ds[["Elliot"]] <- rbind(dmta_ds[["Elliot 1"]], dmta_ds[["Elliot 2"]])  
dmta_ds[["Elliot 1"]] <- NULL  
dmta_ds[["Elliot 2"]] <- NULL
```

In the first step, the datasets are extracted from the `mkindsg` object used for storing these data in `mk`. As the ratio of stereoisomers was not found to have an influence on aerobic soil degradation in the EU assessment, the acronym “DMTA” is used for both compounds, dimethenamid-P and dimethenamid. Furthermore, the data that were obtained under equivalent conditions in the Borstel and Elliot soils were merged.

The result is a list of six time step normalised datasets for the six different soils, suitable for separate analysis with `mmkin` and subsequent combined analysis with `saem.mmkin`.

## Separate evaluations

Please refer to the main article for a rationale of the degradation models used. Figure 59 shows the separate fits of the SFO-SFO3 model to these six datasets using constant variance. The visual impression of the fits appears to be acceptable, but closer inspection shows some deficiencies. First, the residual plot for the parent compound indicates some systematic deviations (a slight U shape typically found if SFO is fitted to biexponential decline data). Then, the residuals for the parent compound tend to be higher than for the transformation product, and for all compounds they tend to increase with the predicted values. Finally, the population curve derived from the mean parameters is not very accurate for M27, as the residues observed for this transformation product are overestimated at later time points.

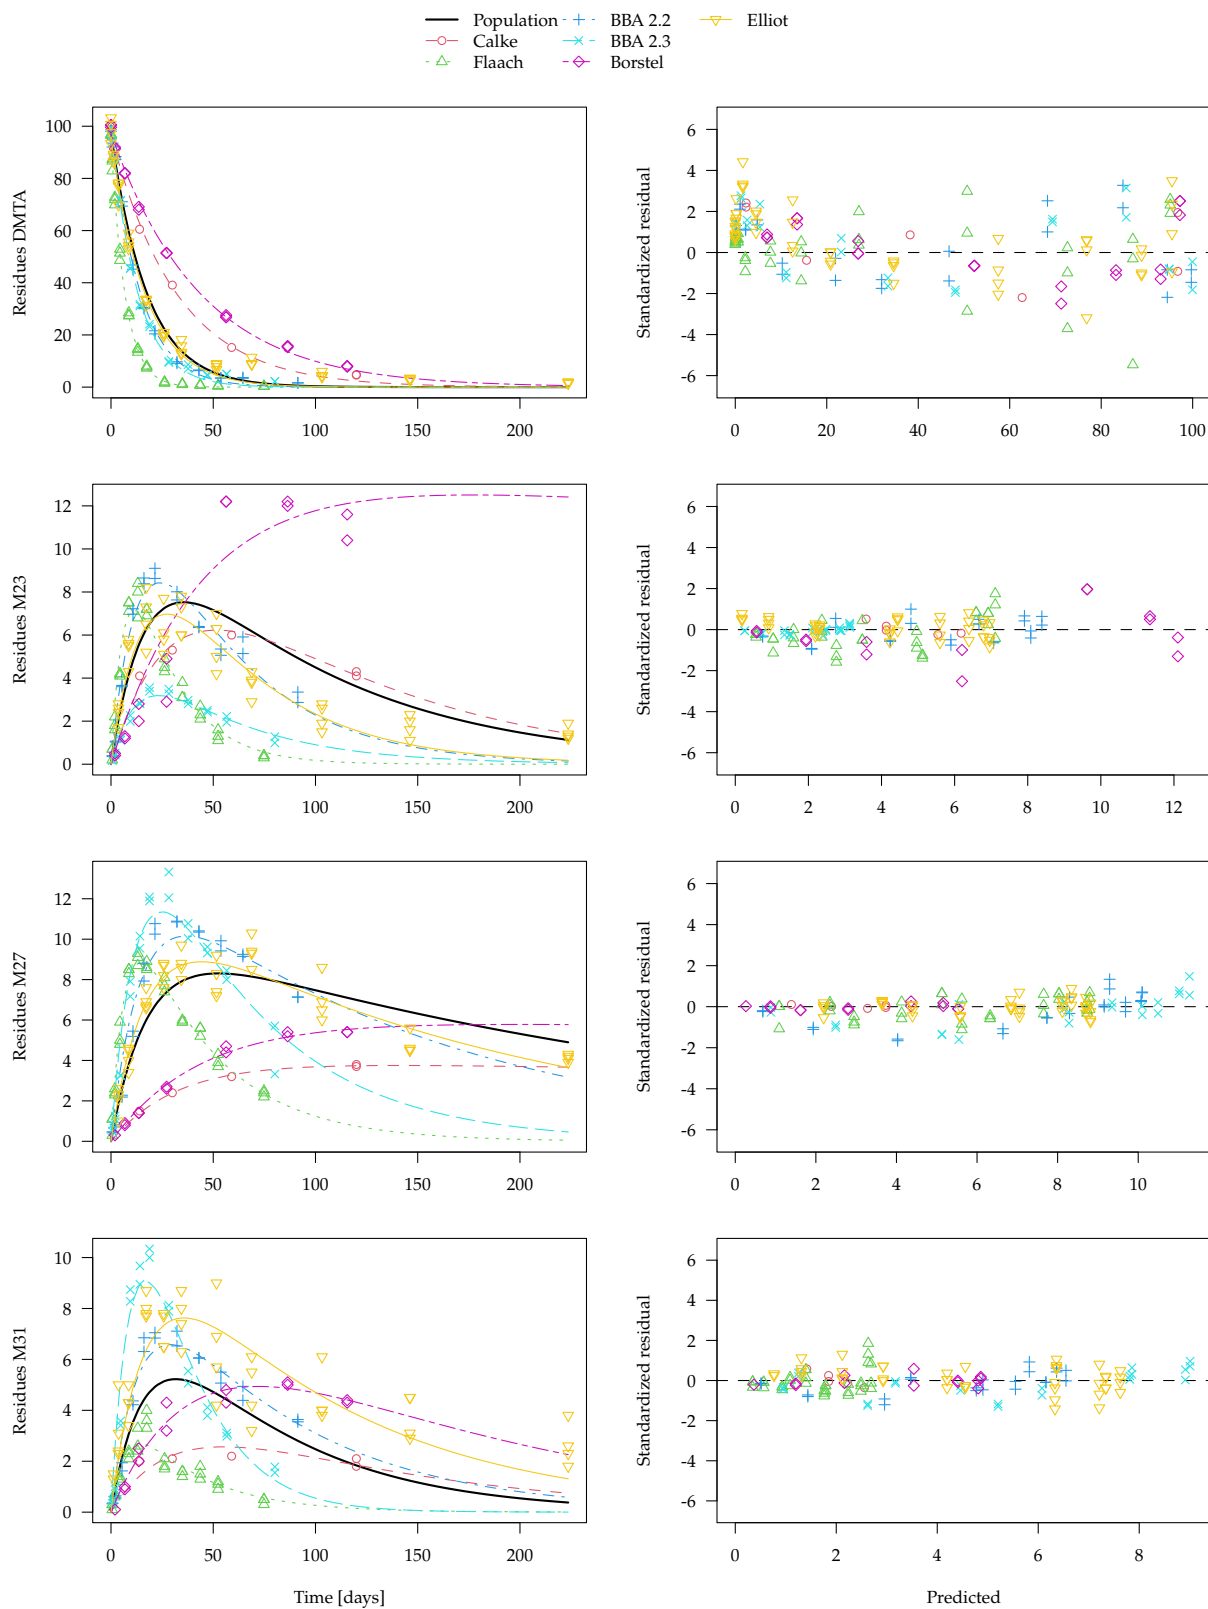

**Figure 59:** Separate fits of the SFO-SFO3 model to the normalised DMTA data assuming constant variance

The latter point is improved by using the additional pathway from M31 to M27 in the degradation

model, i.e. using the model that was relied on in the EU pesticide review (Figure 60).

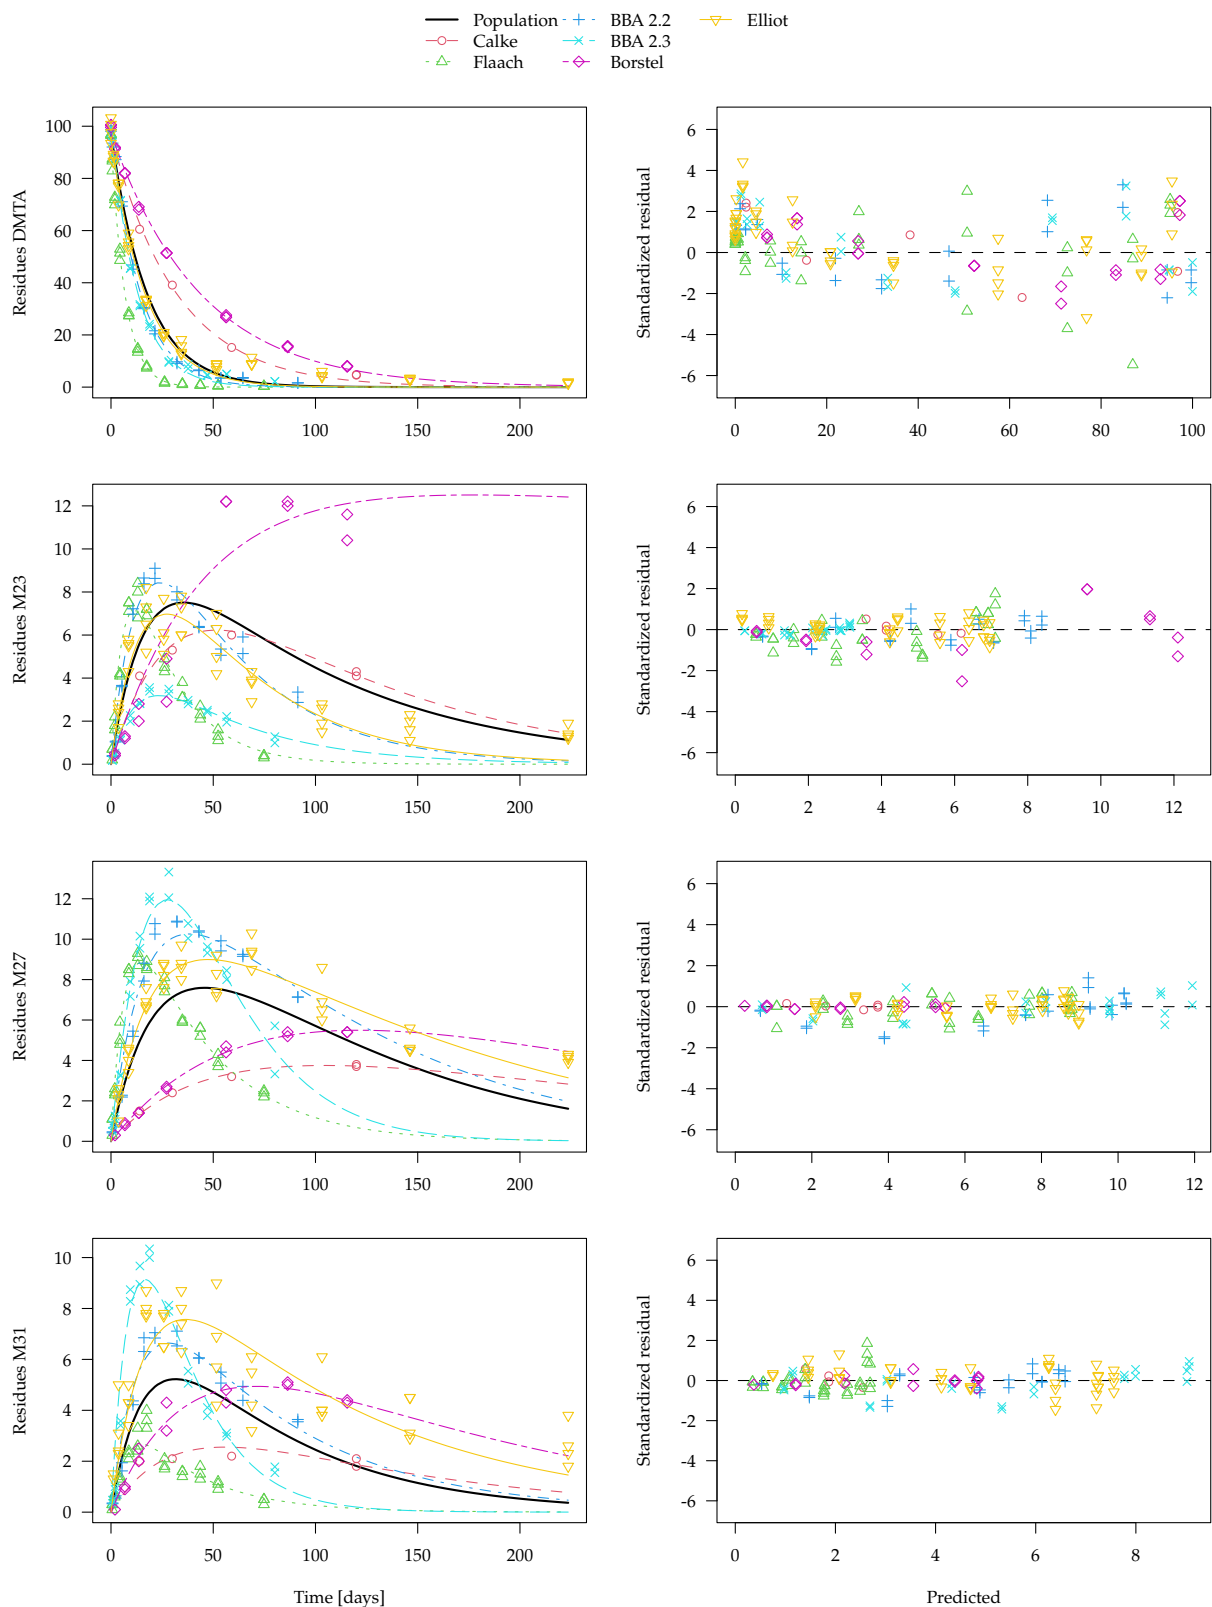

Figure 60: Separate fits of the SFO-SFO3+ model to the normalised DMTA data assuming constant variance

The slight U shape of the residual plot for the parent can be addressed by using DFOP for the parent compound, and the remaining structures in the residual plots can be addressed by using the two alternative error models. The following three tables show the AIC values for the combinations of the four degradation models with the three error models. For each soil, the lowest AIC value found across the three tables is highlighted in bold. From these values it can be concluded that the DFOP model should be used for the parent compound and either variance by variable or the two-component error model should be used.

**Table 21:** AIC values for the separate fits of three degradation models to data from six soils using constant variance

| Soil    | SFO-SFO3 | SFO-SFO3+ | DFOP-SFO3 | DFOP-SFO3+ |
|---------|----------|-----------|-----------|------------|
| Calke   | 80.95    | 80.99     | 68.08     | 68.13      |
| Flaach  | 318.34   | 318.28    | 319.21    | 301.26     |
| BBA 2.2 | 291.88   | 290.22    | 283.64    | 281.64     |
| BBA 2.3 | 332.16   | 325.99    | 313.55    | 304.51     |
| Borstel | 224.18   | 224.09    | 192.15    | 191.83     |
| Elliot  | 769.51   | 770.04    | 622.3     | 621.08     |

**Table 22:** AIC values for the separate fits of three degradation models to data from six soils using variance by variable

| Soil    | SFO-SFO3 | SFO-SFO3+ | DFOP-SFO3   | DFOP-SFO3+    |
|---------|----------|-----------|-------------|---------------|
| Calke   | 43.46    | 46.96     | <b>28.7</b> | 34.02         |
| Flaach  | 266.79   | 266.64    | 270.25      | 270.55        |
| BBA 2.2 | 259.58   | 257.2     | 259.83      | 257.48        |
| BBA 2.3 | 253.24   | 239.41    | 252.79      | <b>238.37</b> |
| Borstel | 158.95   | 150.78    | 147.48      | <b>141.78</b> |
| Elliot  | 637.25   | 639.77    | 577.75      | 574.36        |

**Table 23:** AIC values for the separate fits of three degradation models to data from six soils using two-component error

| Soil    | SFO-SFO3 | SFO-SFO3+ | DFOP-SFO3     | DFOP-SFO3+    |
|---------|----------|-----------|---------------|---------------|
| Calke   | 77.81    | 77.87     | 41.84         | 42.25         |
| Flaach  | 242.38   | 242.25    | <b>240.88</b> | 246.25        |
| BBA 2.2 | 276.94   | 274.5     | 250.66        | <b>246.68</b> |
| BBA 2.3 | 323.08   | 314.73    | 286.28        | 268.26        |
| Borstel | 198.73   | 198.28    | 194.15        | 193.83        |
| Elliot  | 757.37   | 758.28    | 572.25        | <b>569.81</b> |

Figure 61 shows the separate fits of the DFOP-SFO3+ model assuming two-component error. The trends in the residual plots identified above are addressed, there is no U shape of residuals for the parent, and magnitude of the standardized residuals is comparable for the four compounds. However, the degradation curves obtained from the mean parameters are clearly wrong, because parameters  $k_1$  and  $k_2$  converged to excessively small values in one soil each, leading to geometric mean values that are much too small to be representative of the population.

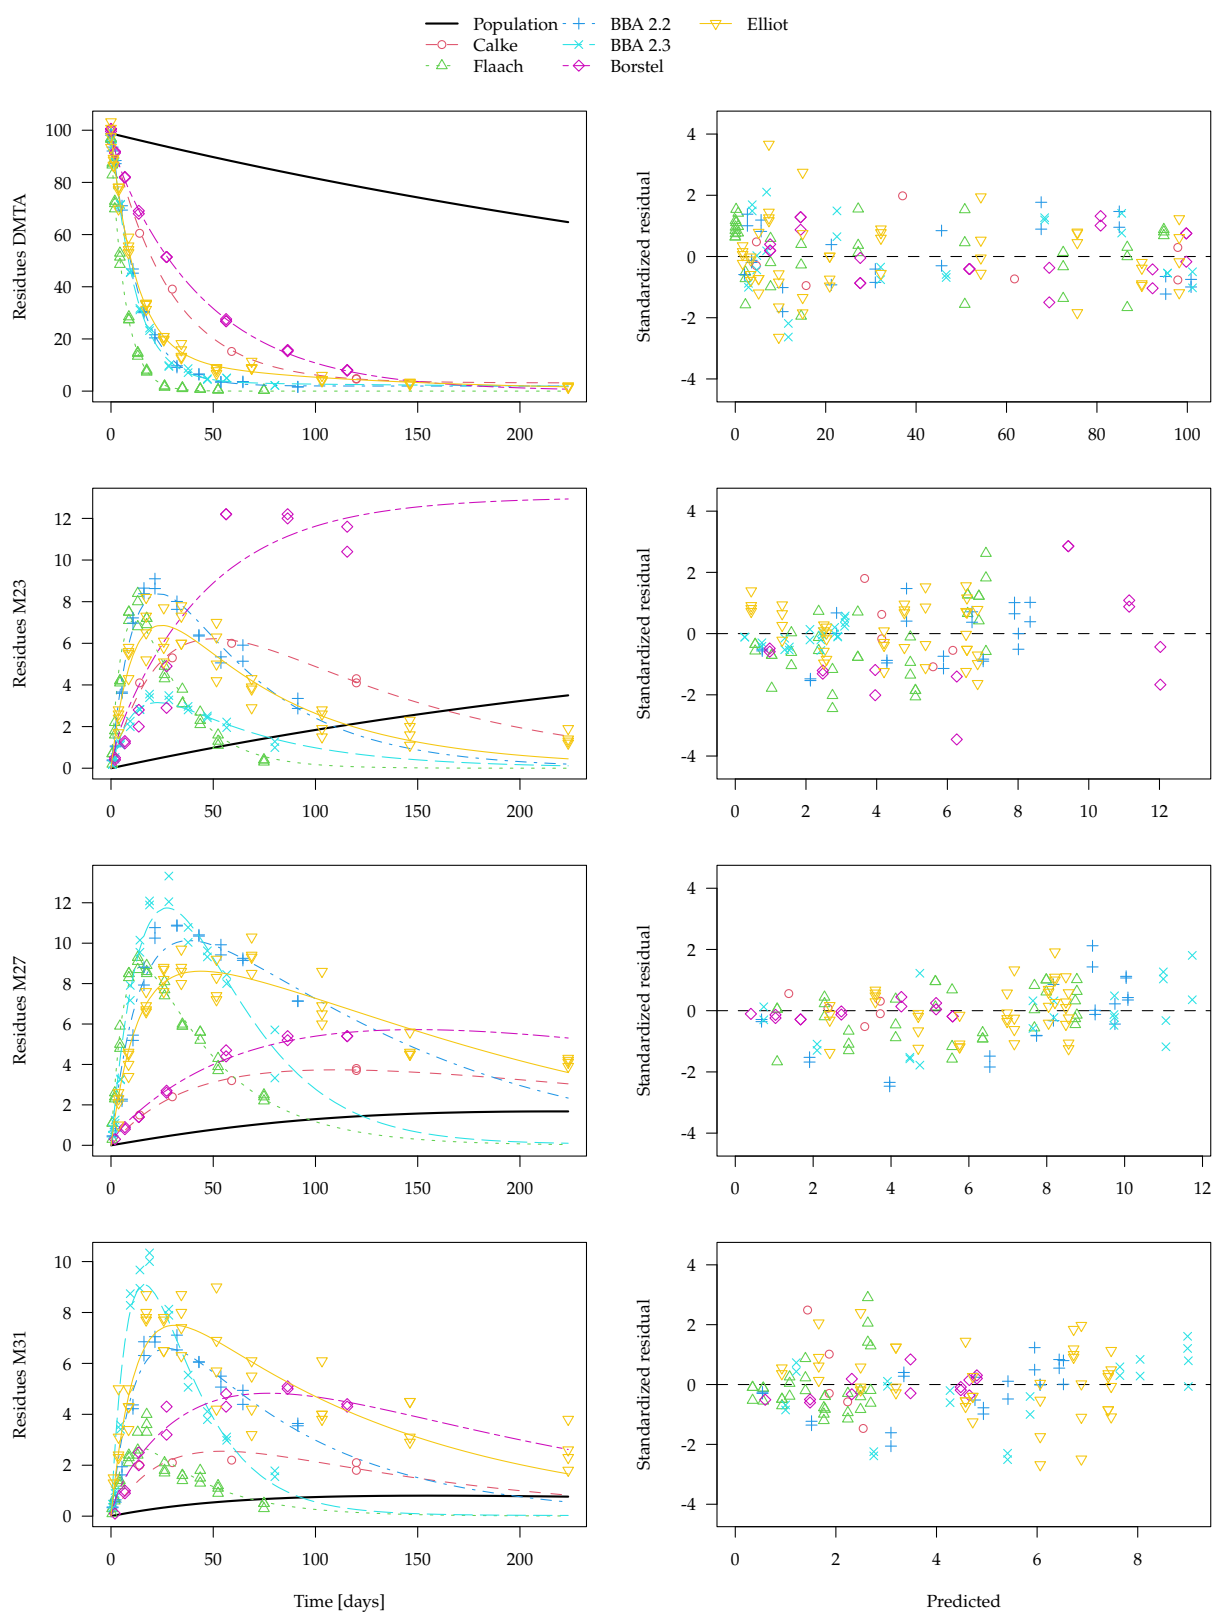

**Figure 61:** Separate fits of the DFOP-SFO3+ model to the normalised DMTA data assuming two-component error

This problem can be alleviated by only considering parameters in the averaging procedure that pass



the t-test for significant difference from zero (Figure 62).

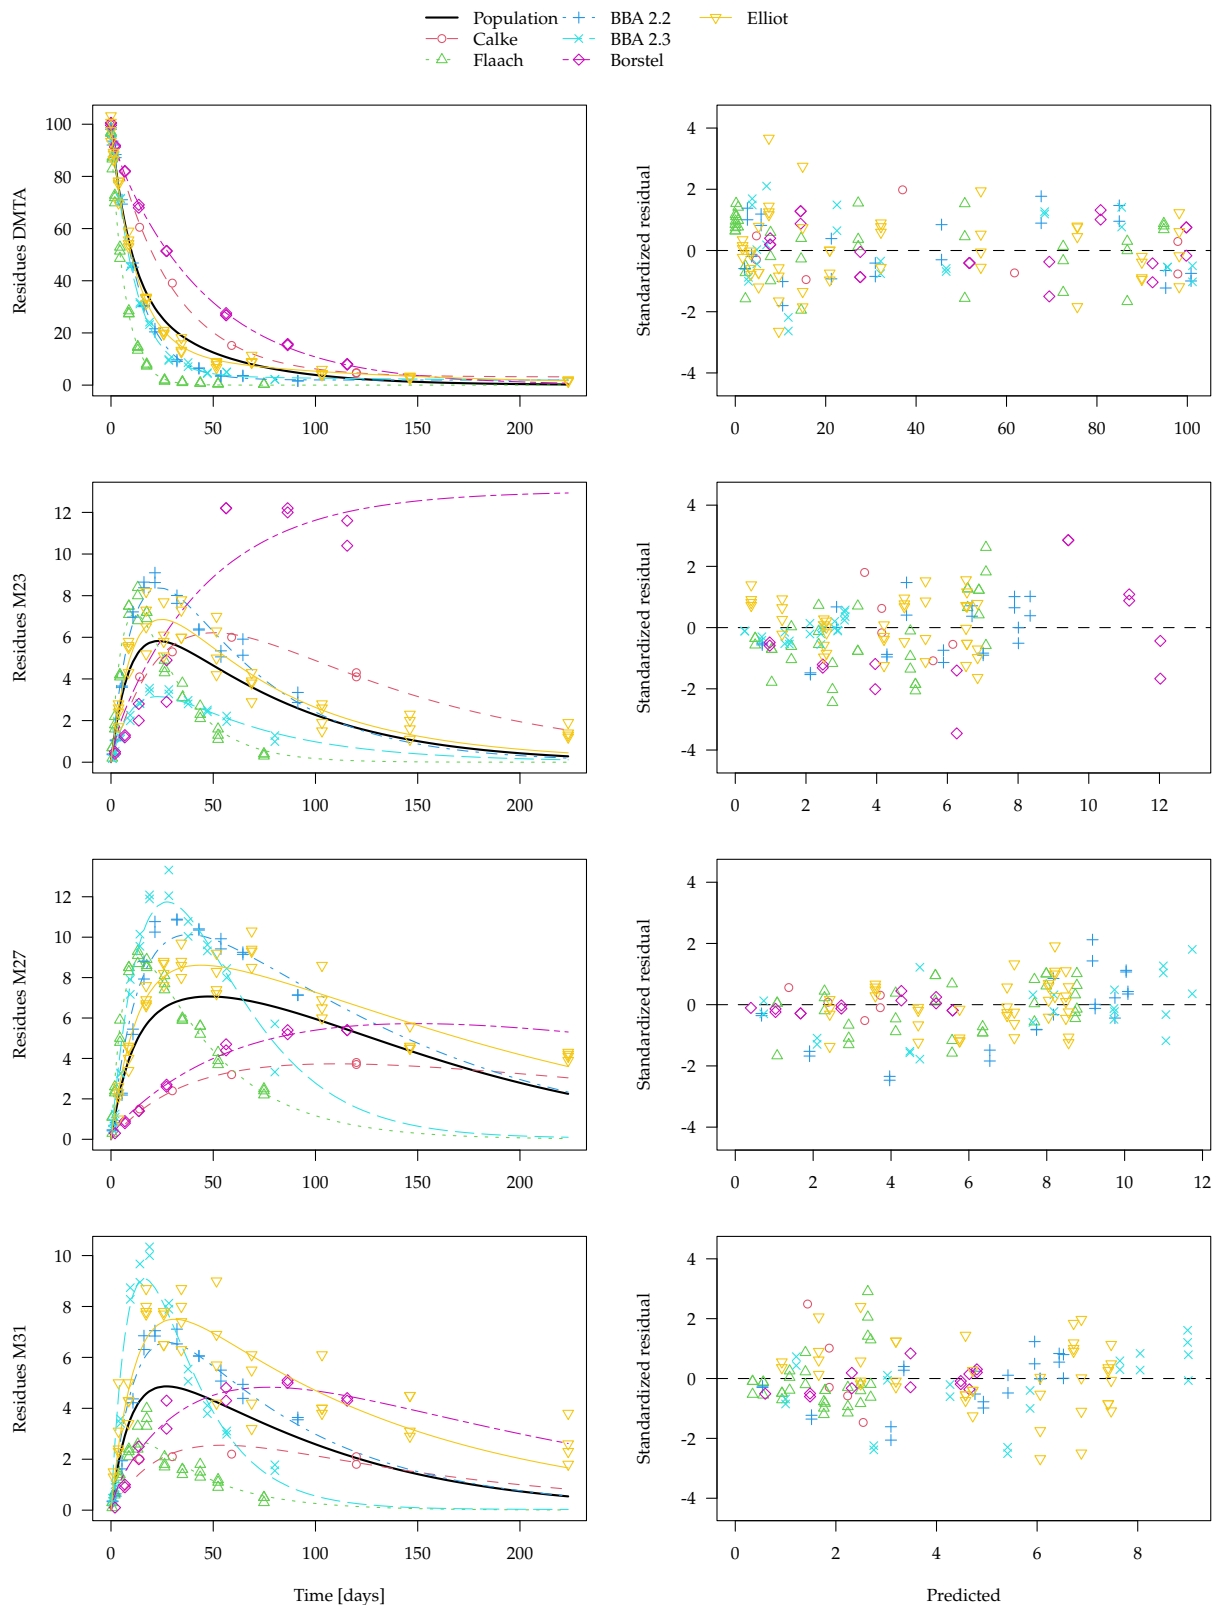

**Figure 62:** Separate fits of the DFOP-SFO3+ model to the normalised DMTA data assuming two-component error, average curve only considering rate constants that can be distinguished from zero

### Simultaneous evaluations

The following figures show convergence plots of saemix fits and comparisons of the results obtained with the corresponding averaged results from separate fits. As no analytical solution are implemented for these degradation models, each of these fits takes more than 15 minutes to complete.

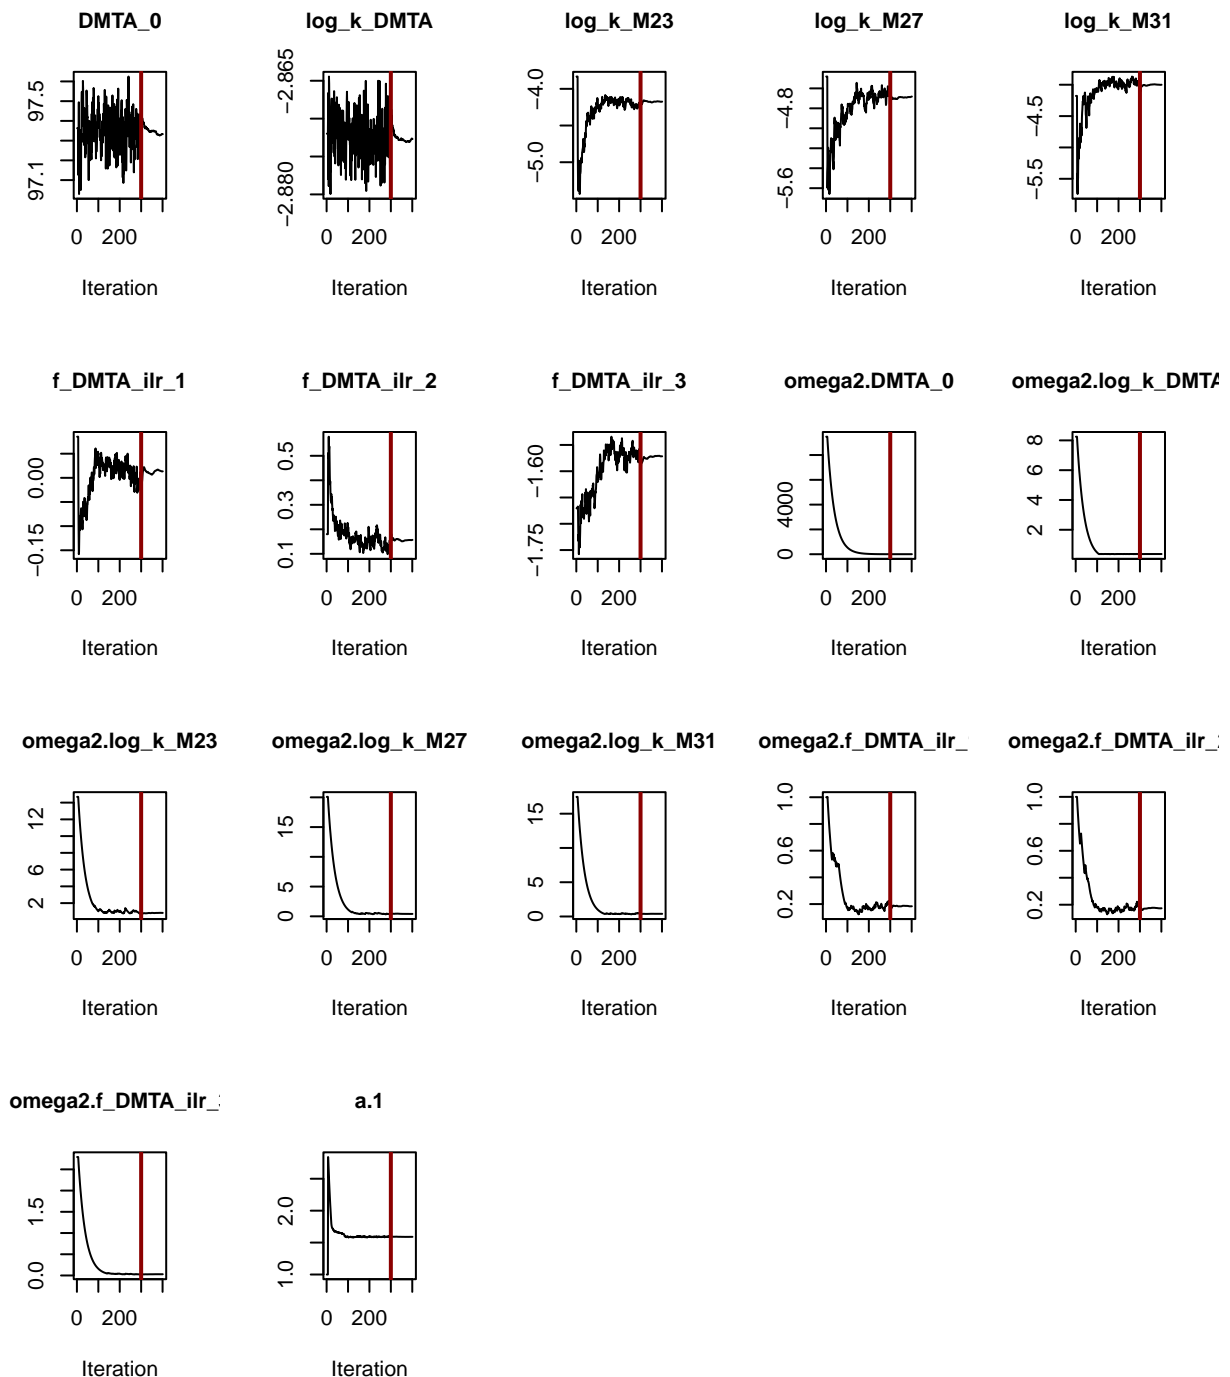

**Figure 63:** Convergence plot of the saemix fit of the SFO-SFO3 model with constant variance to the normalised DMTA data

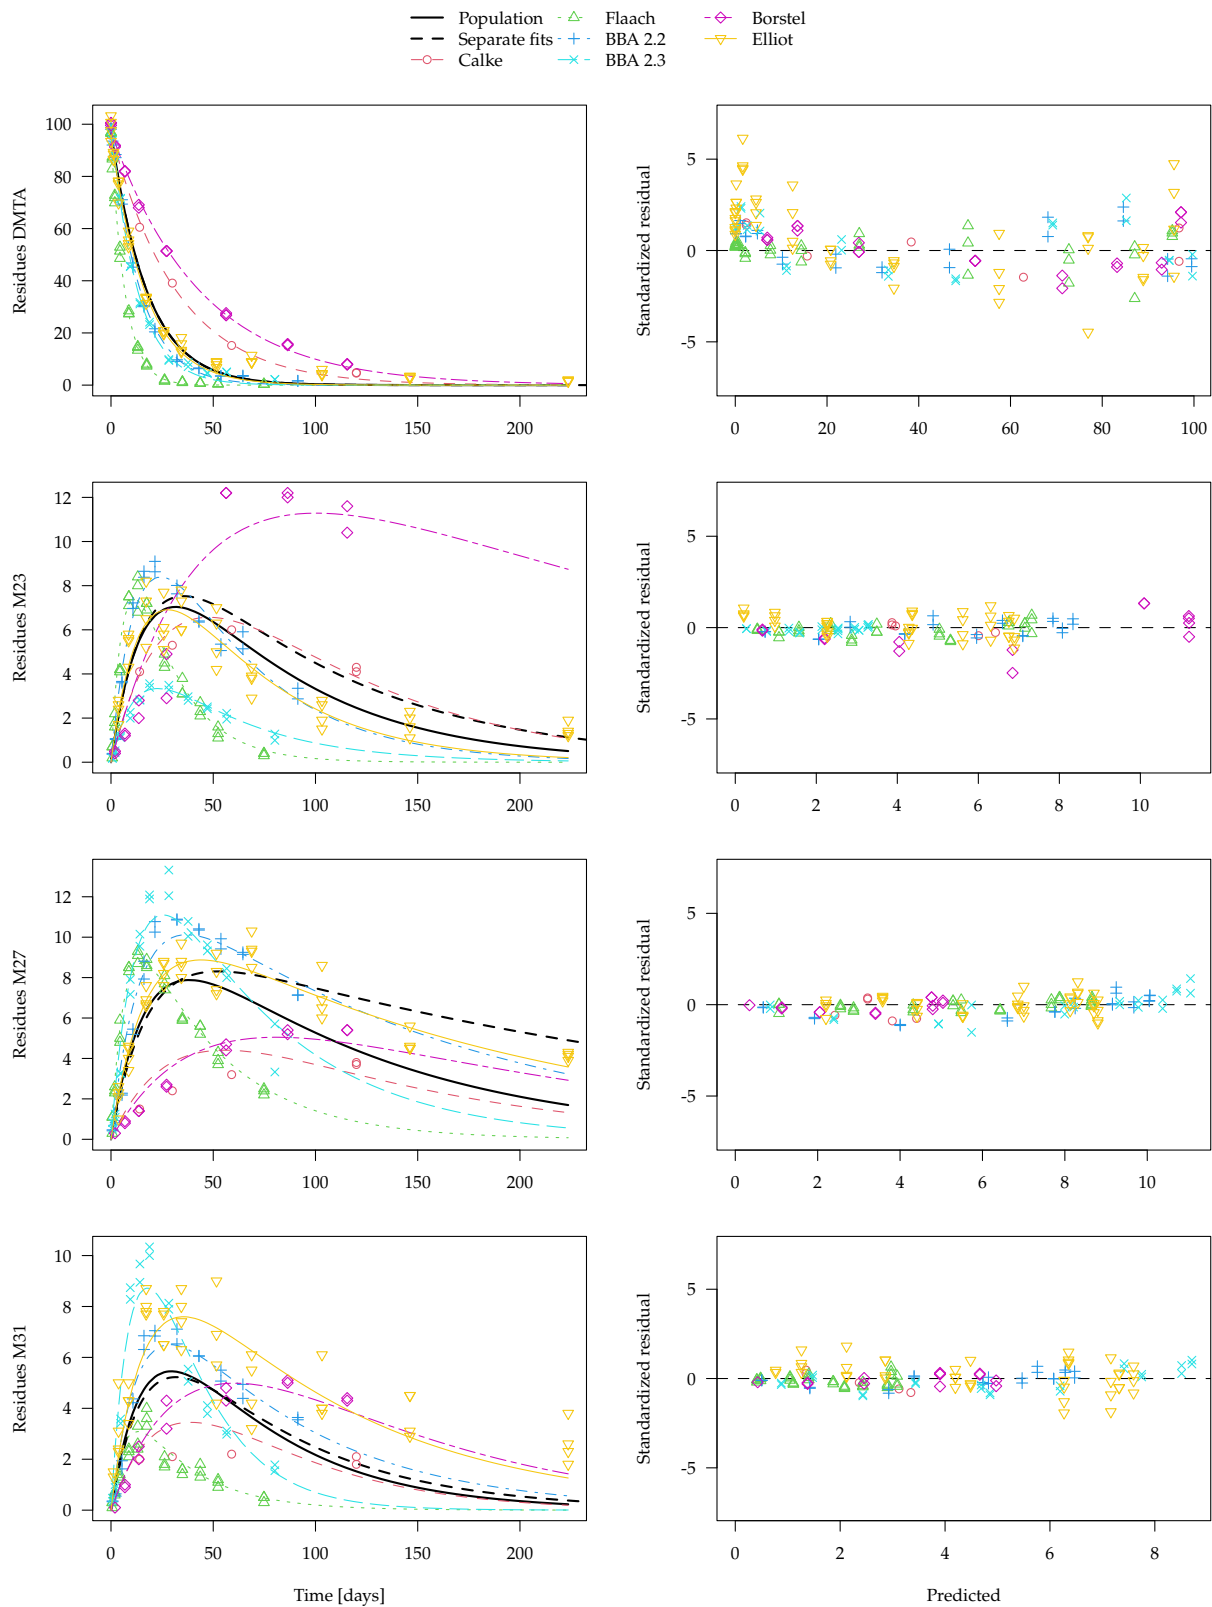

**Figure 64:** SFO-SFO3 model with constant variance fitted with saemix to the data for DMTA in six soils, with additional degradation curves derived from separate evaluations for comparison

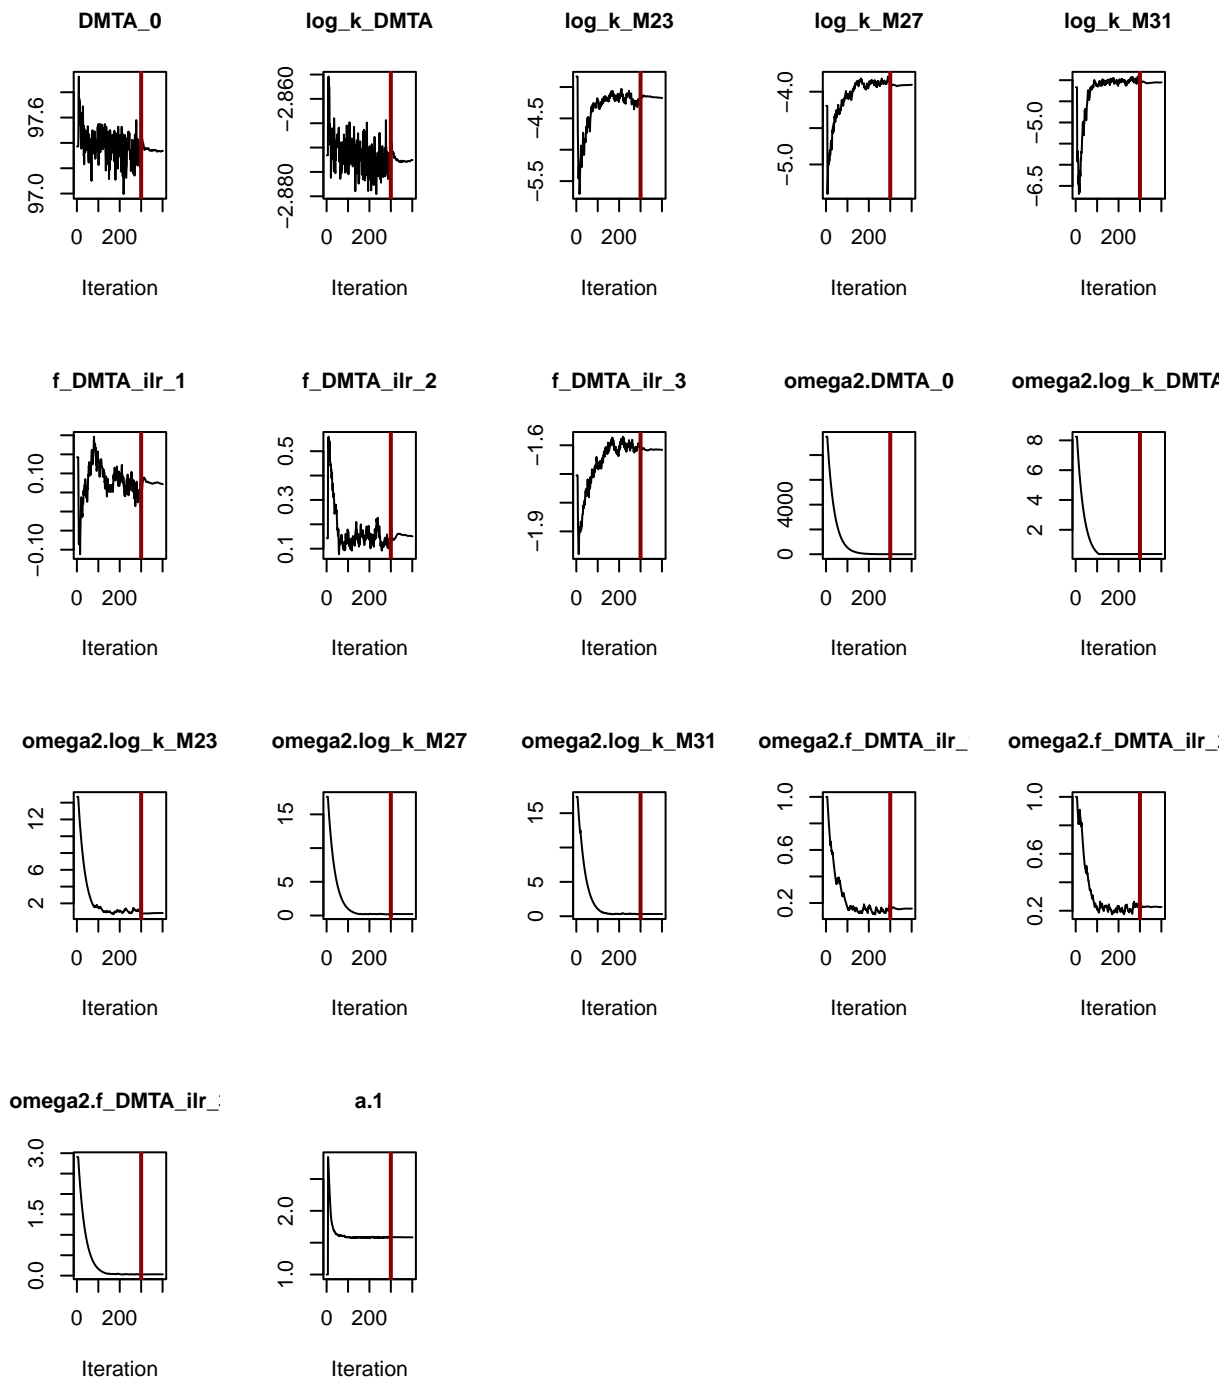

**Figure 65:** Convergence plot of the saemix fit of the SFO-SFO3+ model with constant variance to the normalised DMTA data

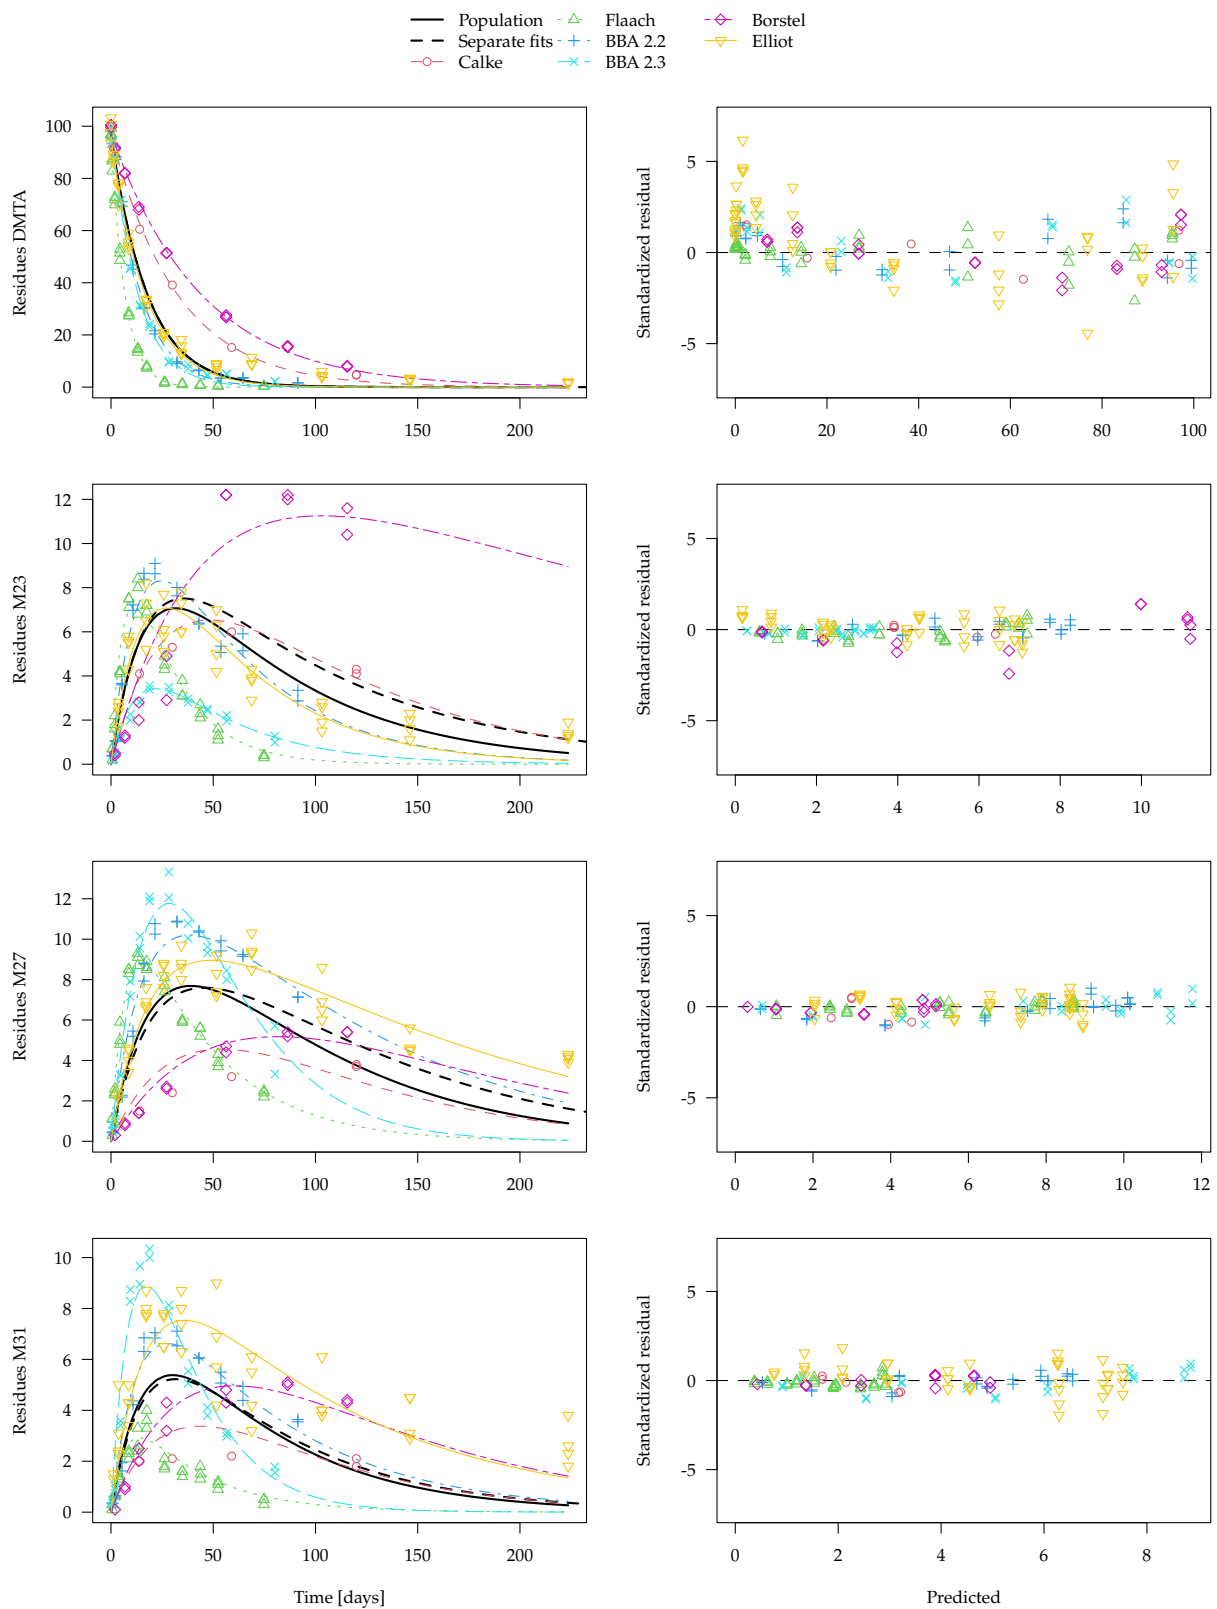

**Figure 66:** SFO-SFO3+ model with constant variance fitted with saemix to the data for DMTA in six soils, with additional degradation curves derived from separate evaluations for comparison

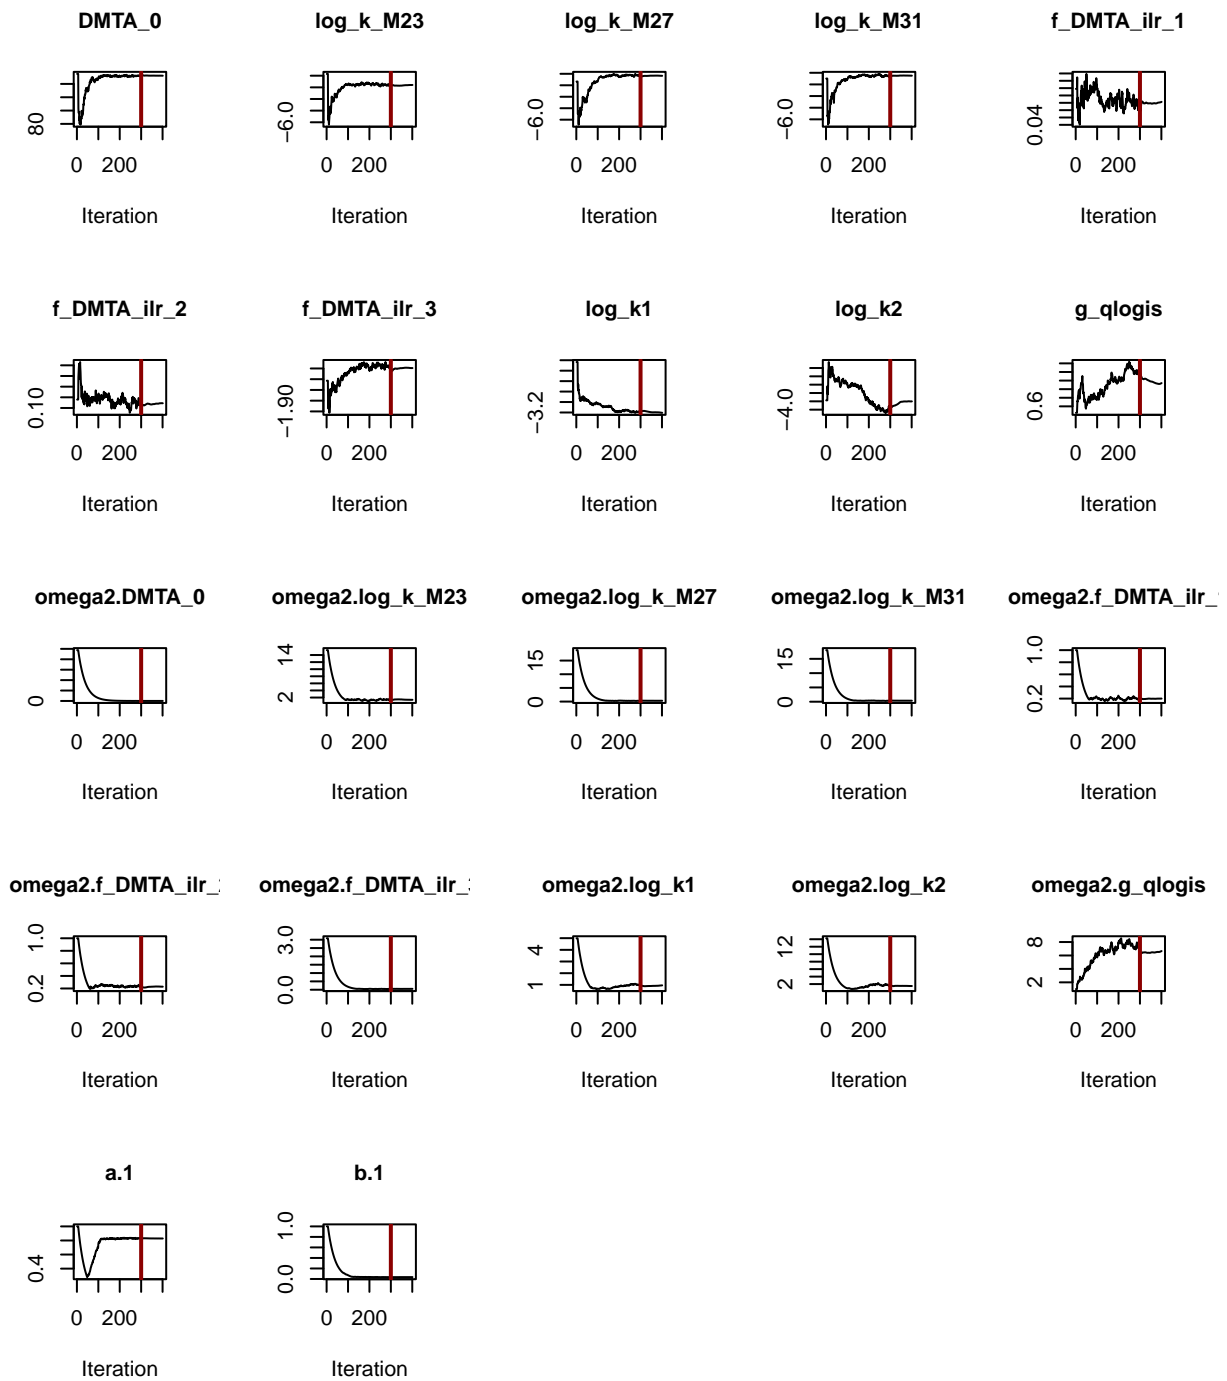

**Figure 67:** Convergence plot of the saemix fit of the DFOP-SFO3+ model with two-component error to the normalised DMTA data

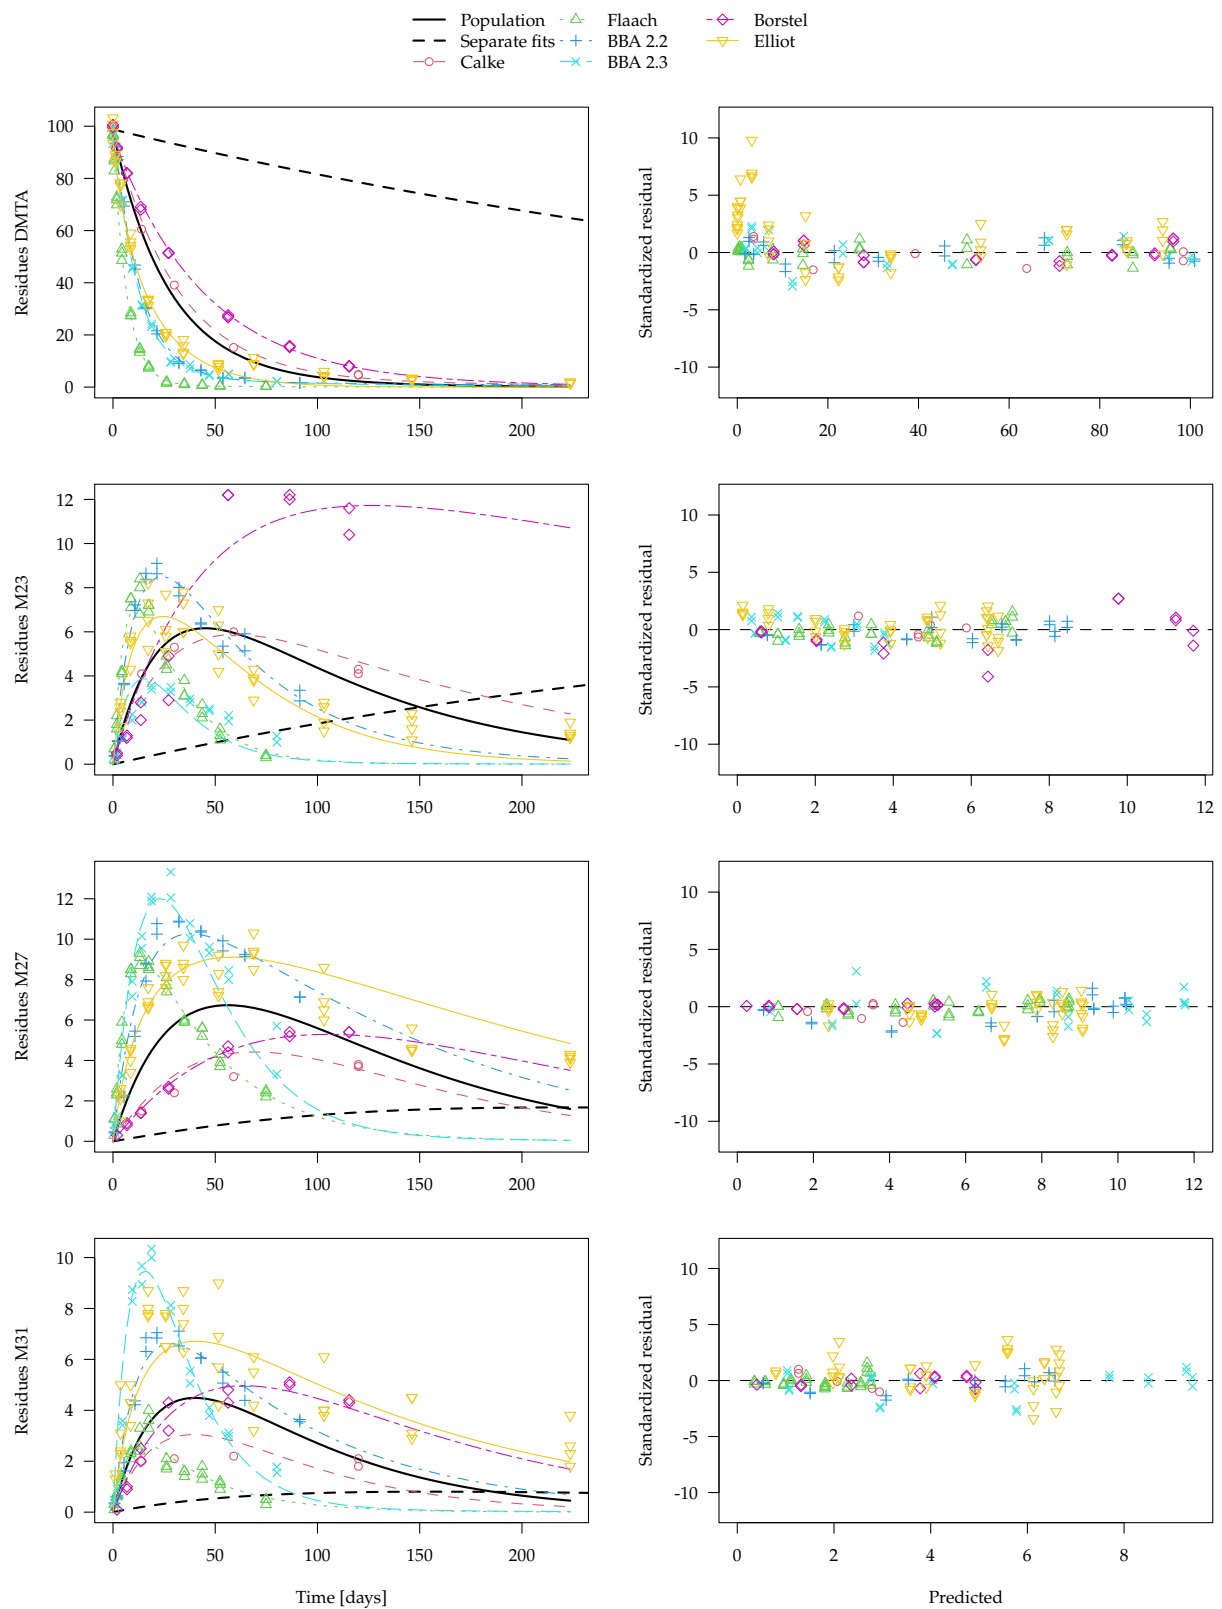

**Figure 68:** DFOP-SFO3+ model with two-component error fitted with saemix to the data for DMTA in six soils, with additional degradation curves derived from untested parameters from separate evaluations

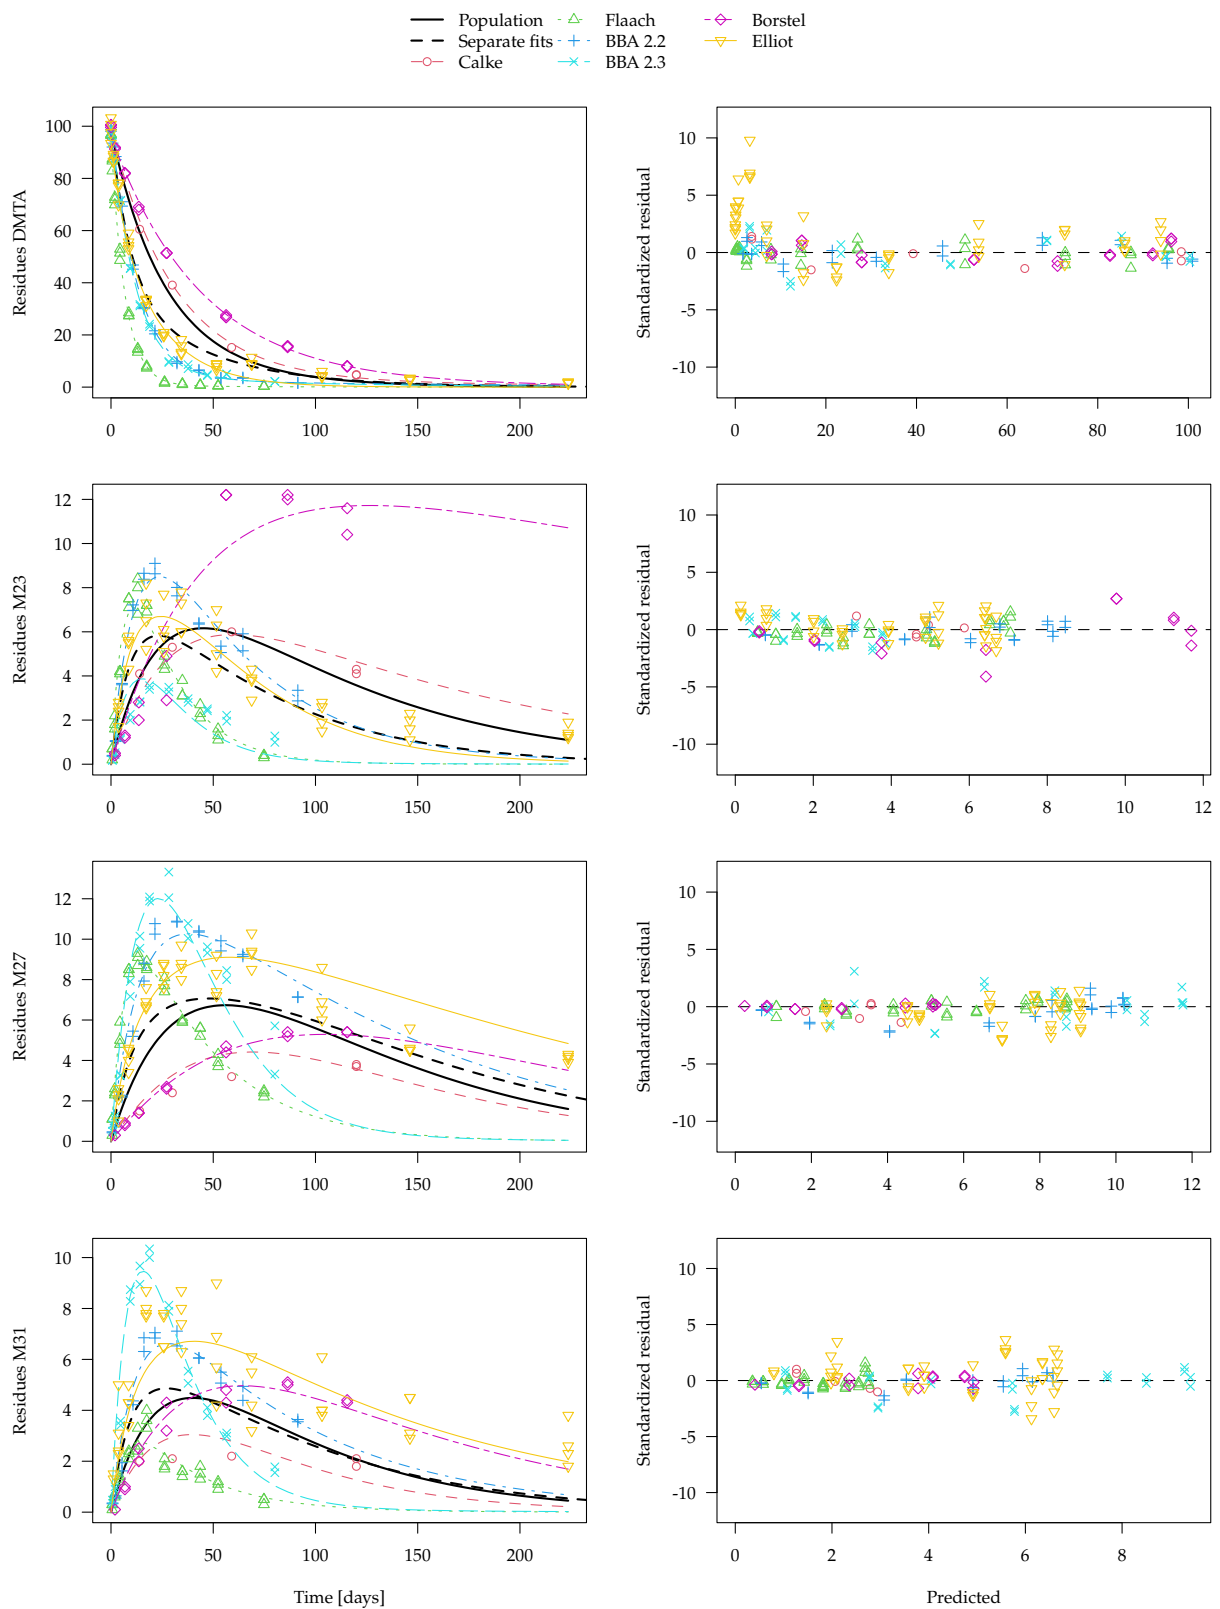

**Figure 69:** DFOP-SFO3+ model with two-component error fitted with saemix to the data for DMTA in six soils, with additional degradation curves derived from tested parameters from separate evaluations

The following model comparison of the three saemix fits shown above show that the DFOP-SFO3+ fit



assuming two-component error (third line) is more favorable.

Likelihoods calculated by importance sampling

|   | AIC      | BIC      |
|---|----------|----------|
| 1 | 2317.586 | 2314.046 |
| 2 | 2312.859 | 2309.319 |
| 3 | 1887.286 | 1882.705 |

Checking all candidate combinations of degradation models and error models checked in the separate evaluations would be quite time consuming when using saemix. In addition, the variance by variable error model is not available. To check if the DFOP-SFO+ fit with two-component error is among the most favorable models, nlme fits were performed with DFOP-SFO and DFOP-SFO+, combined with variance by variable and two-component error. The comparisons of these four nlme fits indicates that DFOP-SFO+ fitted with two-component error is indeed the most favorable combination.

|                   | Model | df | AIC      | BIC      | logLik    | Test   | L.Ratio  | p-value |
|-------------------|-------|----|----------|----------|-----------|--------|----------|---------|
| f_dmta_nlme_3_obs | 1     | 24 | 1927.909 | 2032.120 | -939.9544 |        |          |         |
| f_dmta_nlme_3_tc  | 2     | 22 | 1876.085 | 1971.612 | -916.0428 | 1 vs 2 | 47.82337 | <.0001  |
| f_dmta_nlme_4_obs | 3     | 24 | 1899.773 | 2003.984 | -925.8864 | 2 vs 3 | 19.68720 | 1e-04   |
| f_dmta_nlme_4_tc  | 4     | 22 | 1850.519 | 1946.046 | -903.2596 | 3 vs 4 | 45.25349 | <.0001  |

## References

- EFSA (2014). Conclusion on the peer review of the pesticide risk assessment of the active substance 2,4-D. *EFSA Journal* **12**:3812
- EFSA (2018). Peer review of the pesticide risk assessment of the active substance dimethenamid-P. *EFSA Journal* **16**:5211

## Appendix

### Listings for separate parent only fits for 2,4-D

#### Listing 1: SFO fit to Mississippi data, 2,4-D

```

mkin version used for fitting: 1.0.4.9000
R version used for fitting: 4.1.0
Date of fit: Mon Jul 26 12:17:47 2021
Date of summary: Mon Jul 26 18:52:52 2021

Equations:
d_D24/dt = - k_D24 * D24

Model predictions using solution type analytical

Fitted using 141 model solutions performed in 0.094 s

Error model: Constant variance

Error model algorithm: OLS

Starting values for parameters to be optimised:
      value  type
D24_0  96.8  state
k_D24   0.1 deparm

Starting values for the transformed parameters actually optimised:
      value lower upper
D24_0  96.800000 -Inf  Inf
log_k_D24 -2.302585 -Inf  Inf

Fixed parameter values:
None

Results:

      AIC      BIC    logLik
70.41126 71.31901 -32.20563

Optimised, transformed parameters with symmetric confidence intervals:
      Estimate Std. Error Lower Upper
D24_0    90.030      3.0340 82.860 97.210
log_k_D24 -4.442      0.1121 -4.707 -4.177
sigma      6.059      1.3550  2.856  9.263

Parameter correlation:
      D24_0 log_k_D24      sigma
D24_0    1.000e+00 5.737e-01 -7.934e-09
log_k_D24 5.737e-01 1.000e+00  8.152e-09
sigma    -7.934e-09 8.152e-09 1.000e+00

Backtransformed parameters:
Confidence intervals for internally transformed parameters are asymmetric.
t-test (unrealistically) based on the assumption of normal distribution
for estimators of untransformed parameters.
      Estimate t value  Pr(>t)  Lower  Upper
D24_0  90.03000  29.670 6.360e-09 82.860000 97.21000
k_D24   0.01177   8.924 2.254e-05  0.009034  0.01535
sigma    6.05900   4.472 1.447e-03  2.856000  9.26300

FOCUS Chi2 error levels in percent:
      err.min n.optim df
All data   7.403      2  8
D24        7.403      2  8

```

Estimated disappearance times:  
DT50 DT90  
D24 58.87 195.6

Data:

| time | variable | observed | predicted | residual |
|------|----------|----------|-----------|----------|
| 0    | D24      | 96.8     | 90.03     | 6.765    |
| 2    | D24      | 81.0     | 87.94     | -6.939   |
| 4    | D24      | 81.7     | 85.89     | -4.193   |
| 7    | D24      | 88.2     | 82.91     | 5.288    |
| 15   | D24      | 66.3     | 75.46     | -9.158   |
| 24   | D24      | 72.9     | 67.87     | 5.029    |
| 35   | D24      | 62.6     | 59.63     | 2.975    |
| 56   | D24      | 54.6     | 46.56     | 8.037    |
| 71   | D24      | 35.2     | 39.02     | -3.824   |
| 114  | D24      | 18.0     | 23.52     | -5.521   |

## Listing 2: FOMC fit to Mississippi data, 2,4-D

```

mkin version used for fitting: 1.0.4.9000
R version used for fitting: 4.1.0
Date of fit: Mon Jul 26 12:17:47 2021
Date of summary: Mon Jul 26 18:52:52 2021

Equations:
d_D24/dt = - (alpha/beta) * 1/((time/beta) + 1) * D24

Model predictions using solution type analytical

Fitted using 642 model solutions performed in 0.2 s

Error model: Constant variance

Error model algorithm: OLS

Starting values for parameters to be optimised:
      value  type
D24_0  96.8  state
alpha   1.0  deparm
beta   10.0  deparm

Starting values for the transformed parameters actually optimised:
      value lower upper
D24_0  96.800000 -Inf  Inf
log_alpha  0.000000 -Inf  Inf
log_beta   2.302585 -Inf  Inf

Fixed parameter values:
None

Results:

      AIC      BIC    logLik
72.41136 73.6217 -32.20568

Optimised, transformed parameters with symmetric confidence intervals:
      Estimate Std. Error   Lower   Upper
D24_0    90.03      3.034   82.610   97.460
log_alpha  10.50     117.400 -276.800  297.800
log_beta   14.94     117.400 -272.300  302.200
sigma       6.06      1.356    2.743    9.376

Parameter correlation:
      D24_0 log_alpha log_beta   sigma
D24_0  1.000e+00  0.0004428 -0.0001048  5.242e-06
log_alpha  4.428e-04  1.0000000  0.9999995 -2.941e-02
log_beta  -1.048e-04  0.9999995  1.0000000 -2.941e-02
sigma     5.242e-06 -0.0294083 -0.0294083  1.000e+00

Backtransformed parameters:
Confidence intervals for internally transformed parameters are asymmetric.
t-test (unrealistically) based on the assumption of normal distribution
for estimators of untransformed parameters.
      Estimate t value Pr(>t)   Lower   Upper
D24_0  9.003e+01    NA    NA  8.261e+01  9.746e+01
alpha  3.640e+04    NA    NA  6.362e-121  2.082e+129
beta   3.091e+06    NA    NA  5.387e-119  1.774e+131
sigma  6.060e+00    NA    NA  2.743e+00  9.376e+00

FOCUS Chi2 error levels in percent:
      err.min n.optim df
All data  7.773      3  7
D24      7.773      3  7

```

Estimated disappearance times:  
DT50 DT90 DT50back  
D24 58.87 195.6 58.87

Data:

| time | variable | observed | predicted | residual |
|------|----------|----------|-----------|----------|
| 0    | D24      | 96.8     | 90.03     | 6.765    |
| 2    | D24      | 81.0     | 87.94     | -6.939   |
| 4    | D24      | 81.7     | 85.89     | -4.193   |
| 7    | D24      | 88.2     | 82.91     | 5.288    |
| 15   | D24      | 66.3     | 75.46     | -9.158   |
| 24   | D24      | 72.9     | 67.87     | 5.029    |
| 35   | D24      | 62.6     | 59.63     | 2.975    |
| 56   | D24      | 54.6     | 46.56     | 8.037    |
| 71   | D24      | 35.2     | 39.02     | -3.824   |
| 114  | D24      | 18.0     | 23.52     | -5.521   |

## Listing 3: SFO fit to Fayette data, 2,4-D

```

mkin version used for fitting: 1.0.4.9000
R version used for fitting: 4.1.0
Date of fit: Mon Jul 26 12:17:47 2021
Date of summary: Mon Jul 26 18:52:52 2021

Equations:
d_D24/dt = - k_D24 * D24

Model predictions using solution type analytical

Fitted using 136 model solutions performed in 0.071 s

Error model: Constant variance

Error model algorithm: OLS

Starting values for parameters to be optimised:
      value  type
D24_0 100.9  state
k_D24  0.1  deparm

Starting values for the transformed parameters actually optimised:
      value lower upper
D24_0  100.900000 -Inf  Inf
log_k_D24 -2.302585 -Inf  Inf

Fixed parameter values:
None

Results:

      AIC      BIC    logLik
102.2879 104.4121 -48.14397

Optimised, transformed parameters with symmetric confidence intervals:
      Estimate Std. Error Lower Upper
D24_0      97.870      2.1810 93.120 102.600
log_k_D24  -2.378      0.0827 -2.558 -2.198
sigma       5.993      1.0940 3.609 8.378

Parameter correlation:
      D24_0 log_k_D24 sigma
D24_0  1.000e+00 4.798e-01 -1.554e-08
log_k_D24 4.798e-01 1.000e+00 6.980e-09
sigma   -1.554e-08 6.980e-09 1.000e+00

Backtransformed parameters:
Confidence intervals for internally transformed parameters are asymmetric.
t-test (unrealistically) based on the assumption of normal distribution
for estimators of untransformed parameters.
      Estimate t value Pr(>t) Lower Upper
D24_0 97.87000 44.870 4.891e-15 93.12000 102.6000
k_D24 0.09275 12.090 2.222e-08 0.07745 0.1111
sigma 5.99300 5.477 7.067e-05 3.60900 8.3780

FOCUS Chi2 error levels in percent:
      err.min n.optim df
All data 7.4 2 6
D24 7.4 2 6

Estimated disappearance times:
      DT50 DT90
D24 7.473 24.83

Data:

```

| time | variable | observed | predicted | residual |
|------|----------|----------|-----------|----------|
| 0.0  | D24      | 100.8    | 97.87     | 2.932    |
| 0.0  | D24      | 101.0    | 97.87     | 3.132    |
| 0.1  | D24      | 93.2     | 96.96     | -3.764   |
| 0.1  | D24      | 93.2     | 96.96     | -3.764   |
| 0.3  | D24      | 90.5     | 95.18     | -4.682   |
| 0.3  | D24      | 91.5     | 95.18     | -3.682   |
| 1.0  | D24      | 86.3     | 89.20     | -2.899   |
| 1.0  | D24      | 87.1     | 89.20     | -2.099   |
| 3.0  | D24      | 79.0     | 74.10     | 4.903    |
| 3.0  | D24      | 80.8     | 74.10     | 6.703    |
| 5.0  | D24      | 74.0     | 61.55     | 12.449   |
| 5.0  | D24      | 65.6     | 61.55     | 4.049    |
| 10.0 | D24      | 35.0     | 38.71     | -3.711   |
| 10.0 | D24      | 36.7     | 38.71     | -2.011   |
| 17.0 | D24      | 6.6      | 20.22     | -13.624  |



**Listing 4:** FOMC fit to Fayette data, 2,4-D

```

mkin version used for fitting: 1.0.4.9000
R version used for fitting: 4.1.0
Date of fit: Mon Jul 26 12:17:46 2021
Date of summary: Mon Jul 26 18:52:52 2021

Equations:
d_D24/dt = - (alpha/beta) * 1/((time/beta) + 1) * D24

Model predictions using solution type analytical

Fitted using 339 model solutions performed in 0.183 s

Error model: Constant variance

Error model algorithm: OLS

Starting values for parameters to be optimised:
      value  type
D24_0 100.9  state
alpha  1.0  deparm
beta   10.0  deparm

Starting values for the transformed parameters actually optimised:
      value lower upper
D24_0  100.900000 -Inf  Inf
log_alpha  0.000000 -Inf  Inf
log_beta   2.302585 -Inf  Inf

Fixed parameter values:
None

Warning(s):
Optimisation did not converge:
false convergence (8)

Results:

      AIC      BIC    logLik
104.288 107.1202 -48.14402

Optimised, transformed parameters with symmetric confidence intervals:
      Estimate Std. Error  Lower  Upper
D24_0    97.870     2.181   93.070 102.700
log_alpha 12.030    103.300 -215.400 239.500
log_beta  14.410    103.300 -213.000 241.900
sigma      5.993     1.094    3.585  8.402

Parameter correlation:
      D24_0 log_alpha log_beta  sigma
D24_0  1.000e+00  0.0002041 -0.0001799 2.299e-05
log_alpha 2.041e-04  1.0000000  0.9999997 -1.608e-02
log_beta -1.799e-04  0.9999997  1.0000000 -1.608e-02
sigma    2.299e-05 -0.0160814 -0.0160814  1.000e+00

Backtransformed parameters:
Confidence intervals for internally transformed parameters are asymmetric.
t-test (unrealistically) based on the assumption of normal distribution
for estimators of untransformed parameters.
      Estimate t value Pr(>t)  Lower  Upper
D24_0 9.787e+01    NA    NA 9.307e+01 1.027e+02
alpha 1.677e+05    NA    NA 2.806e-94 1.003e+104
beta  1.809e+06    NA    NA 3.023e-93 1.082e+105
sigma 5.993e+00    NA    NA 3.585e+00 8.402e+00

```

FOCUS Chi2 error levels in percent:  
err.min n.optim df

All data 7.892 3 5  
D24 7.892 3 5

Estimated disappearance times:

DT50 DT90 DT50back  
D24 7.473 24.83 7.473

Data:

| time | variable | observed | predicted | residual |
|------|----------|----------|-----------|----------|
| 0.0  | D24      | 100.8    | 97.87     | 2.932    |
| 0.0  | D24      | 101.0    | 97.87     | 3.132    |
| 0.1  | D24      | 93.2     | 96.96     | -3.764   |
| 0.1  | D24      | 93.2     | 96.96     | -3.764   |
| 0.3  | D24      | 90.5     | 95.18     | -4.682   |
| 0.3  | D24      | 91.5     | 95.18     | -3.682   |
| 1.0  | D24      | 86.3     | 89.20     | -2.899   |
| 1.0  | D24      | 87.1     | 89.20     | -2.099   |
| 3.0  | D24      | 79.0     | 74.10     | 4.903    |
| 3.0  | D24      | 80.8     | 74.10     | 6.703    |
| 5.0  | D24      | 74.0     | 61.55     | 12.449   |
| 5.0  | D24      | 65.6     | 61.55     | 4.049    |
| 10.0 | D24      | 35.0     | 38.71     | -3.711   |
| 10.0 | D24      | 36.7     | 38.71     | -2.011   |
| 17.0 | D24      | 6.6      | 20.22     | -13.624  |

**Listing 5:** SFO fit to RefSol 03-G data, 2,4-D

```

mkin version used for fitting: 1.0.4.9000
R version used for fitting: 4.1.0
Date of fit: Mon Jul 26 12:17:47 2021
Date of summary: Mon Jul 26 18:52:52 2021

Equations:
d_D24/dt = - k_D24 * D24

Model predictions using solution type analytical

Fitted using 135 model solutions performed in 0.038 s

Error model: Constant variance

Error model algorithm: OLS

Starting values for parameters to be optimised:
      value  type
D24_0  98.8  state
k_D24   0.1 deparm

Starting values for the transformed parameters actually optimised:
      value lower upper
D24_0  98.800000 -Inf  Inf
log_k_D24 -2.302585 -Inf  Inf

Fixed parameter values:
None

Results:

      AIC      BIC    logLik
97.05952 99.55916 -45.52976

Optimised, transformed parameters with symmetric confidence intervals:
      Estimate Std. Error Lower Upper
D24_0    92.9100    1.61400 89.4400 96.3700
log_k_D24 -0.8535    0.06486 -0.9927 -0.7144
sigma     3.5230    0.60420 2.2270 4.8190

Parameter correlation:
      D24_0 log_k_D24 sigma
D24_0  1.000e+00 5.067e-01 -5.652e-07
log_k_D24 5.067e-01 1.000e+00 -3.310e-07
sigma -5.652e-07 -3.310e-07 1.000e+00

Backtransformed parameters:
Confidence intervals for internally transformed parameters are asymmetric.
t-test (unrealistically) based on the assumption of normal distribution
for estimators of untransformed parameters.
      Estimate t value Pr(>t) Lower Upper
D24_0  92.9100  57.560 2.452e-18 89.4400 96.3700
k_D24   0.4259 15.420 1.770e-10 0.3706 0.4895
sigma   3.5230  5.831 2.181e-05 2.2270 4.8190

FOCUS Chi2 error levels in percent:
      err.min n.optim df
All data  6.388      2  7
D24       6.388      2  7

Estimated disappearance times:
      DT50 DT90
D24 1.627 5.406

Data:

```

| time | variable | observed | predicted | residual |
|------|----------|----------|-----------|----------|
| 0.0  | D24      | 98.8     | 92.905846 | 5.8942   |
| 0.0  | D24      | 98.8     | 92.905846 | 5.8942   |
| 0.1  | D24      | 87.4     | 89.032058 | -1.6321  |
| 0.1  | D24      | 87.9     | 89.032058 | -1.1321  |
| 0.3  | D24      | 78.1     | 81.762310 | -3.6623  |
| 0.3  | D24      | 78.8     | 81.762310 | -2.9623  |
| 1.0  | D24      | 57.1     | 60.684355 | -3.5844  |
| 1.0  | D24      | 56.1     | 60.684355 | -4.5844  |
| 3.0  | D24      | 25.0     | 25.890720 | -0.8907  |
| 3.0  | D24      | 32.3     | 25.890720 | 6.4093   |
| 5.0  | D24      | 14.7     | 11.046165 | 3.6538   |
| 10.0 | D24      | 3.1      | 1.313349  | 1.7867   |
| 10.0 | D24      | 3.1      | 1.313349  | 1.7867   |
| 17.0 | D24      | 2.7      | 0.066622  | 2.6334   |
| 17.0 | D24      | 2.1      | 0.066622  | 2.0334   |
| 26.0 | D24      | 2.0      | 0.001442  | 1.9986   |
| 26.0 | D24      | 2.2      | 0.001442  | 2.1986   |

## Listing 6: FOMC fit to RefSol 03-G data, 2,4-D

```

mkin version used for fitting: 1.0.4.9000
R version used for fitting: 4.1.0
Date of fit: Mon Jul 26 12:17:47 2021
Date of summary: Mon Jul 26 18:52:52 2021

Equations:
d_D24/dt = - (alpha/beta) * 1/((time/beta) + 1) * D24

Model predictions using solution type analytical

Fitted using 229 model solutions performed in 0.068 s

Error model: Constant variance

Error model algorithm: OLS

Starting values for parameters to be optimised:
      value  type
D24_0  98.8  state
alpha   1.0  deparm
beta   10.0  deparm

Starting values for the transformed parameters actually optimised:
      value lower upper
D24_0  98.800000 -Inf  Inf
log_alpha  0.000000 -Inf  Inf
log_beta   2.302585 -Inf  Inf

Fixed parameter values:
None

Results:

      AIC      BIC  logLik
85.67721 89.01006 -38.8386

Optimised, transformed parameters with symmetric confidence intervals:
      Estimate Std. Error  Lower  Upper
D24_0      95.530      1.2830 92.7600 98.310
log_alpha    0.703      0.2083  0.2530  1.153
log_beta     1.210      0.2867  0.5907  1.829
sigma        2.377      0.4076  1.4960  3.257

Parameter correlation:
      D24_0 log_alpha log_beta  sigma
D24_0  1.000e+00 -4.280e-01 -5.062e-01 -6.870e-08
log_alpha -4.280e-01 1.000e+00  9.858e-01  2.704e-08
log_beta  -5.062e-01  9.858e-01  1.000e+00  3.008e-08
sigma     -6.870e-08  2.704e-08  3.008e-08  1.000e+00

Backtransformed parameters:
Confidence intervals for internally transformed parameters are asymmetric.
t-test (unrealistically) based on the assumption of normal distribution
for estimators of untransformed parameters.
      Estimate t value  Pr(>t)  Lower  Upper
D24_0      95.530  74.460 8.612e-19 92.760 98.310
alpha       2.020   4.800 1.733e-04  1.288  3.168
beta        3.354   3.488 2.001e-03  1.805  6.230
sigma        2.377   5.831 2.933e-05  1.496  3.257

FOCUS Chi2 error levels in percent:
      err.min n.optim df
All data   3.985      3  6
D24        3.985      3  6

```

Estimated disappearance times:

DT50 DT90 DT50back  
D24 1.373 7.132 2.147

Data:

| time | variable | observed | predicted | residual |
|------|----------|----------|-----------|----------|
| 0.0  | D24      | 98.8     | 95.535    | 3.2653   |
| 0.0  | D24      | 98.8     | 95.535    | 3.2653   |
| 0.1  | D24      | 87.4     | 90.030    | -2.6299  |
| 0.1  | D24      | 87.9     | 90.030    | -2.1299  |
| 0.3  | D24      | 78.1     | 80.353    | -2.2534  |
| 0.3  | D24      | 78.8     | 80.353    | -1.5534  |
| 1.0  | D24      | 57.1     | 56.395    | 0.7050   |
| 1.0  | D24      | 56.1     | 56.395    | -0.2950  |
| 3.0  | D24      | 25.0     | 26.281    | -1.2811  |
| 3.0  | D24      | 32.3     | 26.281    | 6.0189   |
| 5.0  | D24      | 14.7     | 15.121    | -0.4209  |
| 10.0 | D24      | 3.1      | 5.863     | -2.7626  |
| 10.0 | D24      | 3.1      | 5.863     | -2.7626  |
| 17.0 | D24      | 2.7      | 2.502     | 0.1975   |
| 17.0 | D24      | 2.1      | 2.502     | -0.4025  |
| 26.0 | D24      | 2.0      | 1.194     | 0.8055   |
| 26.0 | D24      | 2.2      | 1.194     | 1.0055   |

## Listing 7: SFO fit to Site E1 data, 2,4-D

```

mkin version used for fitting: 1.0.4.9000
R version used for fitting: 4.1.0
Date of fit: Mon Jul 26 12:17:47 2021
Date of summary: Mon Jul 26 18:52:52 2021

Equations:
d_D24/dt = - k_D24 * D24

Model predictions using solution type analytical

Fitted using 133 model solutions performed in 0.051 s

Error model: Constant variance

Error model algorithm: OLS

Starting values for parameters to be optimised:
      value  type
D24_0 100.55 state
k_D24  0.10 deparm

Starting values for the transformed parameters actually optimised:
      value lower upper
D24_0  100.550000 -Inf  Inf
log_k_D24 -2.302585 -Inf  Inf

Fixed parameter values:
None

Results:

      AIC      BIC    logLik
87.94132 90.25909 -40.97066

Optimised, transformed parameters with symmetric confidence intervals:
      Estimate Std. Error Lower Upper
D24_0      99.610      1.35600 96.680 102.500
log_k_D24  -1.174      0.05056 -1.283 -1.064
sigma       3.132      0.55370  1.936  4.328

Parameter correlation:
      D24_0 log_k_D24 sigma
D24_0  1.000e+00 4.831e-01 2.925e-08
log_k_D24 4.831e-01 1.000e+00 -1.134e-07
sigma    2.925e-08 -1.134e-07 1.000e+00

Backtransformed parameters:
Confidence intervals for internally transformed parameters are asymmetric.
t-test (unrealistically) based on the assumption of normal distribution
for estimators of untransformed parameters.
      Estimate t value Pr(>t) Lower Upper
D24_0  99.6100 73.470 1.025e-18 96.6800 102.500
k_D24  0.3093 19.780 2.184e-11 0.2773 0.345
sigma  3.1320 5.657 3.920e-05 1.9360 4.328

FOCUS Chi2 error levels in percent:
      err.min n.optim df
All data  4.809      2 7
D24      4.809      2 7

Estimated disappearance times:
      DT50 DT90
D24 2.241 7.445

Data:

```

| time | variable | observed | predicted | residual |
|------|----------|----------|-----------|----------|
| 0.0  | D24      | 100.2    | 99.60950  | 0.5905   |
| 0.0  | D24      | 100.9    | 99.60950  | 1.2905   |
| 0.1  | D24      | 97.9     | 96.57608  | 1.3239   |
| 0.1  | D24      | 98.3     | 96.57608  | 1.7239   |
| 0.3  | D24      | 92.4     | 90.78356  | 1.6164   |
| 0.3  | D24      | 91.9     | 90.78356  | 1.1164   |
| 1.0  | D24      | 65.8     | 73.11204  | -7.3120  |
| 1.0  | D24      | 69.5     | 73.11204  | -3.6120  |
| 3.0  | D24      | 37.5     | 39.38811  | -1.8881  |
| 3.0  | D24      | 40.0     | 39.38811  | 0.6119   |
| 7.0  | D24      | 18.8     | 11.43188  | 7.3681   |
| 7.0  | D24      | 14.4     | 11.43188  | 2.9681   |
| 10.0 | D24      | 3.3      | 4.52045   | -1.2205  |
| 10.0 | D24      | 5.7      | 4.52045   | 1.1795   |
| 17.0 | D24      | 2.6      | 0.51880   | 2.0812   |
| 26.0 | D24      | 2.4      | 0.03208   | 2.3679   |



**Listing 8:** FOMC fit to Site E1 data, 2,4-D

```

mkin version used for fitting: 1.0.4.9000
R version used for fitting: 4.1.0
Date of fit: Mon Jul 26 12:17:45 2021
Date of summary: Mon Jul 26 18:52:52 2021

Equations:
d_D24/dt = - (alpha/beta) * 1/((time/beta) + 1) * D24

Model predictions using solution type analytical

Fitted using 228 model solutions performed in 0.077 s

Error model: Constant variance

Error model algorithm: OLS

Starting values for parameters to be optimised:
      value  type
D24_0 100.55 state
alpha  1.00 deparm
beta  10.00 deparm

Starting values for the transformed parameters actually optimised:
      value lower upper
D24_0  100.550000 -Inf  Inf
log_alpha  0.000000 -Inf  Inf
log_beta   2.302585 -Inf  Inf

Fixed parameter values:
None

Results:

      AIC      BIC    logLik
80.20545 83.2958 -36.10272

Optimised, transformed parameters with symmetric confidence intervals:
      Estimate Std. Error  Lower  Upper
D24_0    101.400    1.1330 98.9000 103.800
log_alpha    1.171    0.2781  0.5648  1.776
log_beta     2.117    0.3428  1.3700  2.864
sigma        2.311    0.4084  1.4210  3.200

Parameter correlation:
      D24_0 log_alpha log_beta  sigma
D24_0  1.000e+00 -4.088e-01 -4.588e-01 -2.066e-09
log_alpha -4.088e-01 1.000e+00 9.935e-01 1.834e-09
log_beta  -4.588e-01 9.935e-01 1.000e+00 1.687e-09
sigma     -2.066e-09 1.834e-09 1.687e-09 1.000e+00

Backtransformed parameters:
Confidence intervals for internally transformed parameters are asymmetric.
t-test (unrealistically) based on the assumption of normal distribution
for estimators of untransformed parameters.
      Estimate t value  Pr(>t)  Lower  Upper
D24_0    101.400  89.440 1.275e-18 98.900 103.800
alpha      3.224   3.596 1.836e-03  1.759  5.909
beta       8.309   2.917 6.450e-03  3.937 17.530
sigma      2.311   5.657 5.306e-05  1.421  3.200

FOCUS Chi2 error levels in percent:
      err.min n.optim df
All data   3.397      3  6
D24        3.397      3  6

```

Estimated disappearance times:

|     |       |       |          |
|-----|-------|-------|----------|
|     | DT50  | DT90  | DT50back |
| D24 | 1.993 | 8.662 | 2.608    |

Data:

| time | variable | observed | predicted | residual |
|------|----------|----------|-----------|----------|
| 0.0  | D24      | 100.2    | 101.366   | -1.16598 |
| 0.0  | D24      | 100.9    | 101.366   | -0.46598 |
| 0.1  | D24      | 97.9     | 97.531    | 0.36937  |
| 0.1  | D24      | 98.3     | 97.531    | 0.76937  |
| 0.3  | D24      | 92.4     | 90.412    | 1.98757  |
| 0.3  | D24      | 91.9     | 90.412    | 1.48757  |
| 1.0  | D24      | 65.8     | 70.270    | -4.46976 |
| 1.0  | D24      | 69.5     | 70.270    | -0.76976 |
| 3.0  | D24      | 37.5     | 37.520    | -0.02008 |
| 3.0  | D24      | 40.0     | 37.520    | 2.47992  |
| 7.0  | D24      | 18.8     | 14.133    | 4.66735  |
| 7.0  | D24      | 14.4     | 14.133    | 0.26735  |
| 10.0 | D24      | 3.3      | 7.937     | -4.63699 |
| 10.0 | D24      | 5.7      | 7.937     | -2.23699 |
| 17.0 | D24      | 2.6      | 2.795     | -0.19460 |
| 26.0 | D24      | 2.4      | 1.048     | 1.35211  |

**Listing 9: SFO fit to Site I2 data, 2,4-D**

```

mkin version used for fitting: 1.0.4.9000
R version used for fitting: 4.1.0
Date of fit: Mon Jul 26 12:17:47 2021
Date of summary: Mon Jul 26 18:52:52 2021

Equations:
d_D24/dt = - k_D24 * D24

Model predictions using solution type analytical

Fitted using 134 model solutions performed in 0.053 s

Error model: Constant variance

Error model algorithm: OLS

Starting values for parameters to be optimised:
      value type
D24_0  98.9 state
k_D24   0.1 deparm

Starting values for the transformed parameters actually optimised:
      value lower upper
D24_0  98.900000 -Inf  Inf
log_k_D24 -2.302585 -Inf  Inf

Fixed parameter values:
None

Results:

      AIC      BIC    logLik
103.7383 106.2379 -48.86913

Optimised, transformed parameters with symmetric confidence intervals:
      Estimate Std. Error Lower Upper
D24_0    97.9900    1.86400 94.000 102.0000
log_k_D24 -0.9846    0.06731 -1.129 -0.8402
sigma     4.2880    0.73530  2.710  5.8650

Parameter correlation:
      D24_0 log_k_D24 sigma
D24_0  1.000e+00 4.397e-01 8.666e-10
log_k_D24 4.397e-01 1.000e+00 -1.885e-09
sigma    8.666e-10 -1.885e-09 1.000e+00

Backtransformed parameters:
Confidence intervals for internally transformed parameters are asymmetric.
t-test (unrealistically) based on the assumption of normal distribution
for estimators of untransformed parameters.
      Estimate t value Pr(>t) Lower Upper
D24_0    97.9900  52.560 8.691e-18 94.0000 102.0000
k_D24    0.3736  14.860 2.890e-10  0.3234  0.4316
sigma     4.2880   5.831 2.181e-05  2.7100  5.8650

FOCUS Chi2 error levels in percent:
      err.min n.optim df
All data   7.495      2  7
D24        7.495      2  7

Estimated disappearance times:
      DT50 DT90
D24 1.855 6.163

Data:

```

| time | variable | observed | predicted | residual |
|------|----------|----------|-----------|----------|
| 0.0  | D24      | 99.0     | 97.994975 | 1.0050   |
| 0.0  | D24      | 98.8     | 97.994975 | 0.8050   |
| 0.1  | D24      | 90.1     | 94.401574 | -4.3016  |
| 0.1  | D24      | 89.2     | 94.401574 | -5.2016  |
| 0.3  | D24      | 86.3     | 87.605242 | -1.3052  |
| 0.3  | D24      | 86.5     | 87.605242 | -1.1052  |
| 1.0  | D24      | 76.7     | 67.446295 | 9.2537   |
| 1.0  | D24      | 74.7     | 67.446295 | 7.2537   |
| 3.0  | D24      | 33.1     | 31.949693 | 1.1503   |
| 5.0  | D24      | 8.8      | 15.134751 | -6.3348  |
| 5.0  | D24      | 6.7      | 15.134751 | -8.4348  |
| 10.0 | D24      | 3.1      | 2.337474  | 0.7625   |
| 10.0 | D24      | 3.2      | 2.337474  | 0.8625   |
| 17.0 | D24      | 1.6      | 0.171012  | 1.4290   |
| 17.0 | D24      | 1.7      | 0.171012  | 1.5290   |
| 26.0 | D24      | 1.5      | 0.005927  | 1.4941   |
| 26.0 | D24      | 1.9      | 0.005927  | 1.8941   |

**Listing 10: FOMC fit to Site I2 data, 2,4-D**

```

mkin version used for fitting: 1.0.4.9000
R version used for fitting: 4.1.0
Date of fit: Mon Jul 26 12:17:47 2021
Date of summary: Mon Jul 26 18:52:52 2021

Equations:
d_D24/dt = - (alpha/beta) * 1/((time/beta) + 1) * D24

Model predictions using solution type analytical

Fitted using 323 model solutions performed in 0.123 s

Error model: Constant variance

Error model algorithm: OLS

Starting values for parameters to be optimised:
      value  type
D24_0  98.9  state
alpha   1.0  deparm
beta   10.0  deparm

Starting values for the transformed parameters actually optimised:
      value lower upper
D24_0  98.9000000 -Inf  Inf
log_alpha  0.0000000 -Inf  Inf
log_beta   2.302585 -Inf  Inf

Fixed parameter values:
None

Warning(s):
Optimisation did not converge:
false convergence (8)

Results:

      AIC      BIC    logLik
105.7384 109.0712 -48.86918

Optimised, transformed parameters with symmetric confidence intervals:
      Estimate Std. Error  Lower  Upper
D24_0    98.000    1.8640   93.970 102.000
log_alpha 12.470   100.2000 -203.900 228.900
log_beta  13.450   100.2000 -203.000 229.900
sigma     4.288     0.7354    2.699  5.876

Parameter correlation:
      D24_0 log_alpha log_beta  sigma
D24_0    1.0000000 -0.001986 -0.002282  0.0003748
log_alpha -0.0019865  1.0000000  1.0000000 -0.0127621
log_beta  -0.0022819  1.0000000  1.0000000 -0.0127622
sigma     0.0003748 -0.012762 -0.012762  1.0000000

Backtransformed parameters:
Confidence intervals for internally transformed parameters are asymmetric.
t-test (unrealistically) based on the assumption of normal distribution
for estimators of untransformed parameters.
      Estimate t value Pr(>t)  Lower  Upper
D24_0 9.8000e+01    NA    NA 9.397e+01 1.020e+02
alpha 2.604e+05     NA    NA 2.684e-89 2.526e+99
beta 6.970e+05     NA    NA 7.180e-89 6.767e+99
sigma 4.288e+00     NA    NA 2.699e+00 5.876e+00

```

FOCUS Chi2 error levels in percent:

|          | err.min | n.optim | df |
|----------|---------|---------|----|
| All data | 7.922   | 3       | 6  |
| D24      | 7.922   | 3       | 6  |

Estimated disappearance times:

|     | DT50  | DT90  | DT50back |
|-----|-------|-------|----------|
| D24 | 1.855 | 6.163 | 1.855    |

Data:

| time | variable | observed | predicted | residual |
|------|----------|----------|-----------|----------|
| 0.0  | D24      | 99.0     | 97.996874 | 1.0031   |
| 0.0  | D24      | 98.8     | 97.996874 | 0.8031   |
| 0.1  | D24      | 90.1     | 94.403232 | -4.3032  |
| 0.1  | D24      | 89.2     | 94.403232 | -5.2032  |
| 0.3  | D24      | 86.3     | 87.606464 | -1.3065  |
| 0.3  | D24      | 86.5     | 87.606464 | -1.1065  |
| 1.0  | D24      | 76.7     | 67.446394 | 9.2536   |
| 1.0  | D24      | 74.7     | 67.446394 | 7.2536   |
| 3.0  | D24      | 33.1     | 31.948647 | 1.1514   |
| 5.0  | D24      | 8.8      | 15.133770 | -6.3338  |
| 5.0  | D24      | 6.7      | 15.133770 | -8.4338  |
| 10.0 | D24      | 3.1      | 2.337157  | 0.7628   |
| 10.0 | D24      | 3.2      | 2.337157  | 0.8628   |
| 17.0 | D24      | 1.6      | 0.170976  | 1.4290   |
| 17.0 | D24      | 1.7      | 0.170976  | 1.5290   |
| 26.0 | D24      | 1.5      | 0.005925  | 1.4941   |
| 26.0 | D24      | 1.9      | 0.005925  | 1.8941   |

## Listings for simultaneous fits for 2,4-D, parent only

### Listing 11: SFO fit with nlme to 2,4-D data, constant variance

```

nlme version used for fitting:      3.1.152
mkin version used for pre-fitting:  1.0.4.9000
R version used for fitting:         4.1.0
Date of fit:      Mon Jul 26 12:18:07 2021
Date of summary: Mon Jul 26 18:52:52 2021

Equations:
d_D24/dt = - k_D24 * D24

Data:
75 observations of 1 variable(s) grouped in 5 datasets

Model predictions using solution type analytical

Fitted in 0.312 s using 2 iterations

Variance model: Constant variance

Mean of starting values for individual parameters:
      D24_0 log_k_D24
      95.683   -1.838

Fixed degradation parameter values:
None

Results:

      AIC   BIC logLik
      498.7 510.3 -244.3

Optimised, transformed parameters with symmetric confidence intervals:
      lower est. upper
D24_0    92.901 95.919 98.9373
log_k_D24 -3.259 -1.831 -0.4028

Correlation:
      D24_0
log_k_D24 0.016

Random effects:
Formula: list(D24_0 ~ 1, log_k_D24 ~ 1)
Level: ds
Structure: Diagonal
      D24_0 log_k_D24 Residual
StdDev: 2.596      1.599      4.956

Backtransformed parameters with asymmetric confidence intervals:
      lower est. upper
D24_0 92.90134 95.9193 98.9373
k_D24  0.03843  0.1603  0.6684

Estimated disappearance times:
      DT50 DT90
D24 4.325 14.37

```

**Listing 12:** SFO fit with nlme to 2,4-D data, two-component error

```

nlme version used for fitting:      3.1.152
mkin version used for pre-fitting:  1.0.4.9000
R version used for fitting:         4.1.0
Date of fit:      Mon Jul 26 12:18:08 2021
Date of summary: Mon Jul 26 18:52:52 2021

Equations:
d_D24/dt = - k_D24 * D24

Data:
75 observations of 1 variable(s) grouped in 5 datasets

Model predictions using solution type analytical

Fitted in 0.446 s using 3 iterations

Variance model: Two-component variance function

Mean of starting values for individual parameters:
  D24_0 log_k_D24
95.318   -1.856

Fixed degradation parameter values:
None

Results:

      AIC   BIC logLik
500.7 514.6 -244.3

Optimised, transformed parameters with symmetric confidence intervals:
      lower est. upper
D24_0  92.902 95.920 98.9375
log_k_D24 -3.259 -1.831 -0.4028

Correlation:
      D24_0
log_k_D24 0.016

Random effects:
Formula: list(D24_0 ~ 1, log_k_D24 ~ 1)
Level: ds
Structure: Diagonal
      D24_0 log_k_D24 Residual
StdDev: 2.596   1.599      1

Variance function:
Structure: Constant plus proportion of variance covariate
Formula: ~fitted(.)
Parameter estimates:
      const      prop
4.955596e+00 -3.170209e-07

Backtransformed parameters with asymmetric confidence intervals:
      lower est. upper
D24_0 92.90157 95.9195 98.9375
k_D24  0.03843  0.1603  0.6684

Estimated disappearance times:
      DT50 DT90
D24 4.325 14.37

```



**Listing 13:** SFO fit with saemix to 2,4-D data, constant variance

```

saemix version used for fitting:      3.1.9000
mkin version used for pre-fitting:    1.0.4.9000
R version used for fitting:          4.1.0
Date of fit:      Mon Jul 26 12:18:11 2021
Date of summary: Mon Jul 26 18:52:52 2021

Equations:
d_D24/dt = - k_D24 * D24

Data:
75 observations of 1 variable(s) grouped in 5 datasets

Model predictions using solution type analytical

Fitted in 1.38 s using 300, 100 iterations

Variance model: Constant variance

Mean of starting values for individual parameters:
  D24_0 log_k_D24
95.683   -1.838

Fixed degradation parameter values:
None

Results:

Likelihood computed by importance sampling
  AIC   BIC logLik
498.7 496.8 -244.4

Optimised parameters:
      est. lower upper
D24_0  95.914 92.977 98.8508
log_k_D24 -1.829 -3.234 -0.4245

Correlation:
      D24_0
log_k_D24 0.016

Random effects:
      est. lower upper
SD.D24_0  2.552 -0.1818 5.285
SD.log_k_D24 1.600  0.6062 2.595

Variance model:
      est. lower upper
a.1 4.96 4.108 5.813

Backtransformed parameters:
      est. lower upper
D24_0 95.9141 92.97730 98.8508
k_D24  0.1605  0.03941  0.6541

Estimated disappearance times:
      DT50 DT90
D24 4.317 14.34

```

**Listing 14:** SFO fit with saemix to 2,4-D data, two-component error

```

saemix version used for fitting:      3.1.9000
mkin version used for pre-fitting:    1.0.4.9000
R version used for fitting:          4.1.0
Date of fit:      Mon Jul 26 12:18:16 2021
Date of summary: Mon Jul 26 18:52:52 2021

Equations:
d_D24/dt = - k_D24 * D24

Data:
75 observations of 1 variable(s) grouped in 5 datasets

Model predictions using solution type analytical

Fitted in 3.568 s using 300, 100 iterations

Variance model: Two-component variance function

Mean of starting values for individual parameters:
  D24_0 log_k_D24
95.318   -1.856

Fixed degradation parameter values:
None

Results:

Likelihood computed by importance sampling
  AIC   BIC logLik
500.7 498.4 -244.4

Optimised parameters:
      est. lower upper
D24_0  95.857 92.871 98.8421
log_k_D24 -1.831 -3.235 -0.4259

Correlation:
      D24_0
log_k_D24 0.016

Random effects:
      est. lower upper
SD.D24_0  2.627 -0.1311 5.384
SD.log_k_D24 1.600  0.6062 2.595

Variance model:
      est. lower upper
a.1  4.954e+00  3.48913 6.41886
b.1 -1.926e-06 -0.02246 0.02245

Backtransformed parameters:
      est. lower upper
D24_0 95.8565 92.87101 98.8421
k_D24  0.1603  0.03935  0.6531

Estimated disappearance times:
      DT50 DT90
D24  4.324 14.36

```

**Listing 15:** FOMC fit with saemix to 2,4-D data, constant variance

```

saemix version used for fitting:      3.1.9000
mkin version used for pre-fitting:    1.0.4.9000
R version used for fitting:          4.1.0
Date of fit:      Mon Jul 26 12:18:19 2021
Date of summary:  Mon Jul 26 18:52:52 2021

Equations:
d_D24/dt = - (alpha/beta) * 1/((time/beta) + 1) * D24

Data:
75 observations of 1 variable(s) grouped in 5 datasets

Model predictions using solution type analytical

Fitted in 1.972 s using 300, 100 iterations

Variance model: Constant variance

Mean of starting values for individual parameters:
  D24_0 log_alpha log_beta
  96.56   8.60    10.32

Fixed degradation parameter values:
None

Results:

Likelihood computed by importance sampling
  AIC  BIC logLik
  503.1 500.4 -244.6

Optimised parameters:
      est. lower upper
D24_0  95.943  92.9  98.98
log_alpha  7.706 -130.0 145.42
log_beta   9.536 -128.2 147.29

Correlation:
      D24_0 lg_lph
log_alpha 0.184
log_beta  0.184 1.000

Random effects:
      est. lower upper
SD.D24_0  2.636 -0.1046 5.376
SD.log_alpha 1.510 -86.8922 89.913
SD.log_beta  1.270 -103.8801 106.421

Variance model:
      est. lower upper
a.1 4.941 4.092 5.79

Backtransformed parameters:
      est. lower upper
D24_0  95.94 9.290e+01 9.898e+01
alpha 2221.15 3.446e-57 1.432e+63
beta 13844.85 2.072e-56 9.253e+63

Estimated disappearance times:
      DT50 DT90 DT50back
D24 4.321 14.36 4.323

```

## Listings for separate pathway fits for 2,4-D

**Listing 16:** SFO-SFO-SFO fit to Fayette data, variance by variable

```

mkin version used for fitting: 1.0.4.9000
R version used for fitting: 4.1.0
Date of fit: Mon Jul 26 12:18:33 2021
Date of summary: Mon Jul 26 18:52:52 2021

Equations:
d_D24/dt = - k_D24 * D24
d_DCP/dt = + f_D24_to_DCP * k_D24 * D24 - k_DCP * DCP
d_DCA/dt = + f_DCP_to_DCA * k_DCP * DCP - k_DCA * DCA

Model predictions using solution type deSolve

Fitted using 2644 model solutions performed in 2.837 s

Error model: Variance unique to each observed variable

Error model algorithm: d.3
Direct fitting and three-step fitting yield approximately the same likelihood

Starting values for parameters to be optimised:
      value  type
D24_0      100.9000 state
k_D24        0.1000 deparm
k_DCP        0.1001 deparm
k_DCA        0.1002 deparm
f_D24_to_DCP 0.5000 deparm
f_DCP_to_DCA 0.5000 deparm
sigma_D24     3.0000 error
sigma_DCP     3.0000 error
sigma_DCA     3.0000 error

Starting values for the transformed parameters actually optimised:
      value lower upper
D24_0      100.9000000 -Inf  Inf
log_k_D24   -2.302585 -Inf  Inf
log_k_DCP   -2.301586 -Inf  Inf
log_k_DCA   -2.300587 -Inf  Inf
f_D24_qlogis 0.0000000 -Inf  Inf
f_DCP_qlogis 0.0000000 -Inf  Inf
sigma_D24     3.0000000  0  Inf
sigma_DCP     3.0000000  0  Inf
sigma_DCA     3.0000000  0  Inf

Fixed parameter values:
      value  type
DCP_0      0 state
DCA_0      0 state

Warning(s):
Observations with value of zero were removed from the data

Results:

      AIC      BIC    logLik
166.7987 180.7968 -74.39935

Optimised, transformed parameters with symmetric confidence intervals:
      Estimate Std. Error   Lower   Upper
D24_0      97.5900 2.177e+00 9.311e+01 102.1000
log_k_D24   -2.4000 8.210e-02 -2.569e+00 -2.2310
log_k_DCP   -1.8400 7.825e-02 -2.001e+00 -1.6790
log_k_DCA   -4.4510 9.209e-01 -6.344e+00 -2.5590
f_D24_qlogis -0.9006 1.275e-01 -1.163e+00 -0.6386

```

```
f_DCP_qlogis 19.3600 7.821e+03 -1.606e+04 16100.0000
sigma_D24    6.0080 1.102e+00 3.743e+00 8.2720
sigma_DCP    1.1610 2.301e-01 6.884e-01 1.6340
sigma_DCA    0.5565 1.504e-01 2.473e-01 0.8657
```

Parameter correlation:

```
      D24_0 log_k_D24 log_k_DCP log_k_DCA f_D24_qlogis
D24_0 1.000e+00 4.778e-01 -0.1365334 -0.1557886 -0.5673655
log_k_D24 4.778e-01 1.000e+00 -0.2857601 -0.3260606 -0.7898829
log_k_DCP -1.365e-01 -2.858e-01 1.0000000 0.5086110 0.2257435
log_k_DCA -1.558e-01 -3.261e-01 0.5086110 1.0000000 0.6787900
f_D24_qlogis -5.674e-01 -7.899e-01 0.2257435 0.6787900 1.0000000
f_DCP_qlogis 7.531e-06 1.576e-05 -0.0002669 0.0001427 -0.0001429
sigma_D24 -4.528e-02 -9.477e-02 0.0270817 0.0309010 0.0748578
sigma_DCP 4.292e-02 8.983e-02 0.0407568 0.0624863 -0.0226949
sigma_DCA 7.417e-03 1.552e-02 -0.0948537 -0.1299843 -0.0779521
      f_DCP_qlogis sigma_D24 sigma_DCP sigma_DCA
D24_0 7.531e-06 -4.528e-02 4.292e-02 7.417e-03
log_k_D24 1.576e-05 -9.477e-02 8.983e-02 1.552e-02
log_k_DCP -2.669e-04 2.708e-02 4.076e-02 -9.485e-02
log_k_DCA 1.427e-04 3.090e-02 6.249e-02 -1.300e-01
f_D24_qlogis -1.429e-04 7.486e-02 -2.269e-02 -7.795e-02
f_DCP_qlogis 1.000e+00 -1.493e-06 -3.669e-05 -1.549e-05
sigma_D24 -1.493e-06 1.000e+00 -8.513e-03 -1.471e-03
sigma_DCP -3.669e-05 -8.513e-03 1.000e+00 -1.477e-02
sigma_DCA -1.549e-05 -1.471e-03 -1.477e-02 1.000e+00
```

Backtransformed parameters:

Confidence intervals for internally transformed parameters are asymmetric.  
t-test (unrealistically) based on the assumption of normal distribution  
for estimators of untransformed parameters.

```
      Estimate t value Pr(>t) Lower Upper
D24_0 97.59000 44.710 2.009e-26 93.110000 102.10000
k_D24 0.09072 12.050 1.914e-12 0.076630 0.10740
k_DCP 0.15890 4.725 3.474e-05 0.135300 0.18660
k_DCA 0.01166 0.648 2.613e-01 0.001757 0.07742
f_D24_to_DCP 0.28890 6.582 2.788e-07 0.238200 0.34560
f_DCP_to_DCA 1.00000 3.458 9.445e-04 0.000000 1.00000
sigma_D24 6.00800 5.452 5.117e-06 3.743000 8.27200
sigma_DCP 1.16100 4.771 3.073e-05 0.688400 1.63400
sigma_DCA 0.55650 3.661 5.622e-04 0.247300 0.86570
```

FOCUS Chi2 error levels in percent:

```
      err.min n.optim df
All data 12.278 6 13
D24 7.510 2 6
DCP 19.923 2 5
DCA 5.939 2 2
```

Resulting formation fractions:

```
      ff
D24_DCP 2.889e-01
D24_sink 7.111e-01
DCP_DCA 1.000e+00
DCP_sink 3.927e-09
```

Estimated disappearance times:

```
      DT50 DT90
D24 7.640 25.38
DCP 4.363 14.49
DCA 59.439 197.45
```

Data:

```
time variable observed predicted residual
0.0 D24 100.8 97.5879 3.2121
0.0 D24 101.0 97.5879 3.4121
0.1 D24 93.2 96.7065 -3.5065
0.1 D24 93.2 96.7065 -3.5065
0.3 D24 90.5 94.9677 -4.4677
```

|      |     |      |         |          |
|------|-----|------|---------|----------|
| 0.3  | D24 | 91.5 | 94.9677 | -3.4677  |
| 1.0  | D24 | 86.3 | 89.1243 | -2.8243  |
| 1.0  | D24 | 87.1 | 89.1243 | -2.0243  |
| 3.0  | D24 | 79.0 | 74.3355 | 4.6645   |
| 3.0  | D24 | 80.8 | 74.3355 | 6.4645   |
| 5.0  | D24 | 74.0 | 62.0007 | 11.9993  |
| 5.0  | D24 | 65.6 | 62.0007 | 3.5993   |
| 10.0 | D24 | 35.0 | 39.3910 | -4.3910  |
| 10.0 | D24 | 36.7 | 39.3910 | -2.6910  |
| 17.0 | D24 | 6.6  | 20.8737 | -14.2737 |
| 0.1  | DCP | 1.4  | 0.2526  | 1.1474   |
| 0.1  | DCP | 1.6  | 0.2526  | 1.3474   |
| 0.3  | DCP | 2.5  | 0.7392  | 1.7608   |
| 0.3  | DCP | 2.4  | 0.7392  | 1.6608   |
| 1.0  | DCP | 2.9  | 2.2583  | 0.6417   |
| 1.0  | DCP | 3.1  | 2.2583  | 0.8417   |
| 3.0  | DCP | 4.4  | 5.2867  | -0.8867  |
| 3.0  | DCP | 4.2  | 5.2867  | -1.0867  |
| 5.0  | DCP | 5.8  | 6.8863  | -1.0863  |
| 5.0  | DCP | 5.4  | 6.8863  | -1.4863  |
| 10.0 | DCP | 8.2  | 7.4871  | 0.7129   |
| 10.0 | DCP | 8.7  | 7.4871  | 1.2129   |
| 17.0 | DCP | 5.8  | 5.5086  | 0.2914   |
| 3.0  | DCA | 0.5  | 1.4139  | -0.9139  |
| 3.0  | DCA | 0.5  | 1.4139  | -0.9139  |
| 5.0  | DCA | 3.2  | 3.3238  | -0.1238  |
| 5.0  | DCA | 3.5  | 3.3238  | 0.1762   |
| 10.0 | DCA | 9.5  | 8.8998  | 0.6002   |
| 10.0 | DCA | 9.1  | 8.8998  | 0.2002   |
| 17.0 | DCA | 15.0 | 15.2249 | -0.2249  |

## Listing 17: SFO-SFO(ns)-SFO fit to Fayette data, variance by variable

```

mkin version used for fitting: 1.0.4.9000
R version used for fitting: 4.1.0
Date of fit: Mon Jul 26 12:18:32 2021
Date of summary: Mon Jul 26 18:52:52 2021

Equations:
d_D24/dt = - k_D24 * D24
d_DCP/dt = + f_D24_to_DCP * k_D24 * D24 - k_DCP * DCP
d_DCA/dt = + k_DCP * DCP - k_DCA * DCA

Model predictions using solution type deSolve

Fitted using 2246 model solutions performed in 2.228 s

Error model: Variance unique to each observed variable

Error model algorithm: d_3
Direct fitting and three-step fitting yield approximately the same likelihood

Starting values for parameters to be optimised:
      value  type
D24_0      100.9000 state
k_D24        0.1000 deparm
k_DCP        0.1001 deparm
k_DCA        0.1002 deparm
f_D24_to_DCP 0.5000 deparm
sigma_D24     3.0000 error
sigma_DCP     3.0000 error
sigma_DCA     3.0000 error

Starting values for the transformed parameters actually optimised:
      value lower upper
D24_0      100.900000 -Inf  Inf
log_k_D24   -2.302585 -Inf  Inf
log_k_DCP   -2.301586 -Inf  Inf
log_k_DCA   -2.300587 -Inf  Inf
f_D24_qlogis 0.000000 -Inf  Inf
sigma_D24     3.000000  0  Inf
sigma_DCP     3.000000  0  Inf
sigma_DCA     3.000000  0  Inf

Fixed parameter values:
      value type
DCP_0      0 state
DCA_0      0 state

Warning(s):
Observations with value of zero were removed from the data

Results:
      AIC      BIC    logLik
164.7987 177.2415 -74.39935

Optimised, transformed parameters with symmetric confidence intervals:
      Estimate Std. Error Lower Upper
D24_0      97.5900    2.17700 93.1200 102.1000
log_k_D24   -2.4000    0.08210 -2.5680 -2.2320
log_k_DCP   -1.8400    0.07825 -2.0000 -1.6790
log_k_DCA   -4.4510    0.92090 -6.3410 -2.5620
f_D24_qlogis -0.9006    0.12750 -1.1620 -0.6391
sigma_D24     6.0080    1.10200 3.7470 8.2680
sigma_DCP     1.1610    0.23010 0.6893 1.6330
sigma_DCA     0.5565    0.15040 0.2479 0.8651

```

## Parameter correlation:

|              | D24_0     | log_k_D24 | log_k_DCP | log_k_DCA | f_D24_qlogis | sigma_D24 |
|--------------|-----------|-----------|-----------|-----------|--------------|-----------|
| D24_0        | 1.000000  | 0.47779   | -0.13653  | -0.15579  | -0.56737     | -0.045279 |
| log_k_D24    | 0.477790  | 1.000000  | -0.28576  | -0.32606  | -0.78988     | -0.094771 |
| log_k_DCP    | -0.136533 | -0.28576  | 1.000000  | 0.50861   | 0.22574      | 0.027082  |
| log_k_DCA    | -0.155787 | -0.32606  | 0.50861   | 1.000000  | 0.67879      | 0.030901  |
| f_D24_qlogis | -0.567366 | -0.78988  | 0.22574   | 0.67879   | 1.000000     | 0.074858  |
| sigma_D24    | -0.045279 | -0.09477  | 0.02708   | 0.03090   | 0.07486      | 1.000000  |
| sigma_DCP    | 0.042920  | 0.08983   | 0.04076   | 0.06249   | -0.02270     | -0.008513 |
| sigma_DCA    | 0.007417  | 0.01552   | -0.09485  | -0.12998  | -0.07795     | -0.001471 |
|              | sigma_DCP | sigma_DCA |           |           |              |           |
| D24_0        | 0.042920  | 0.007417  |           |           |              |           |
| log_k_D24    | 0.089831  | 0.015524  |           |           |              |           |
| log_k_DCP    | 0.040757  | -0.094855 |           |           |              |           |
| log_k_DCA    | 0.062486  | -0.129984 |           |           |              |           |
| f_D24_qlogis | -0.022695 | -0.077952 |           |           |              |           |
| sigma_D24    | -0.008513 | -0.001471 |           |           |              |           |
| sigma_DCP    | 1.000000  | -0.014772 |           |           |              |           |
| sigma_DCA    | -0.014772 | 1.000000  |           |           |              |           |

## Backtransformed parameters:

Confidence intervals for internally transformed parameters are asymmetric.  
t-test (unrealistically) based on the assumption of normal distribution  
for estimators of untransformed parameters.

|              | Estimate | t value | Pr(>t)    | Lower     | Upper     |
|--------------|----------|---------|-----------|-----------|-----------|
| D24_0        | 97.59000 | 44.820  | 3.458e-27 | 93.120000 | 102.10000 |
| k_D24        | 0.09072  | 12.180  | 8.811e-13 | 0.076660  | 0.10740   |
| k_DCP        | 0.15890  | 12.780  | 2.903e-13 | 0.135300  | 0.18650   |
| k_DCA        | 0.01166  | 1.086   | 1.436e-01 | 0.001763  | 0.07715   |
| f_D24_to_DCP | 0.28890  | 11.030  | 8.264e-12 | 0.238300  | 0.34550   |
| sigma_D24    | 6.00800  | 5.453   | 4.526e-06 | 3.747000  | 8.26800   |
| sigma_DCP    | 1.16100  | 5.048   | 1.339e-05 | 0.689300  | 1.63300   |
| sigma_DCA    | 0.55650  | 3.700   | 4.869e-04 | 0.247900  | 0.86510   |

## FOCUS Chi2 error levels in percent:

|          | err.min | n.optim | df |
|----------|---------|---------|----|
| All data | 11.93   | 5       | 14 |
| D24      | 7.51    | 2       | 6  |
| DCP      | 19.92   | 2       | 5  |
| DCA      | 5.20    | 1       | 3  |

## Resulting formation fractions:

ff  
D24\_DCP 0.2889  
D24\_sink 0.7111

## Estimated disappearance times:

DT50 DT90  
D24 7.640 25.38  
DCP 4.363 14.49  
DCA 59.439 197.45

## Data:

| time | variable | observed | predicted | residual |
|------|----------|----------|-----------|----------|
| 0.0  | D24      | 100.8    | 97.5879   | 3.2121   |
| 0.0  | D24      | 101.0    | 97.5879   | 3.4121   |
| 0.1  | D24      | 93.2     | 96.7065   | -3.5065  |
| 0.1  | D24      | 93.2     | 96.7065   | -3.5065  |
| 0.3  | D24      | 90.5     | 94.9677   | -4.4677  |
| 0.3  | D24      | 91.5     | 94.9677   | -3.4677  |
| 1.0  | D24      | 86.3     | 89.1243   | -2.8243  |
| 1.0  | D24      | 87.1     | 89.1243   | -2.0243  |
| 3.0  | D24      | 79.0     | 74.3355   | 4.6645   |
| 3.0  | D24      | 80.8     | 74.3355   | 6.4645   |
| 5.0  | D24      | 74.0     | 62.0007   | 11.9993  |
| 5.0  | D24      | 65.6     | 62.0007   | 3.5993   |
| 10.0 | D24      | 35.0     | 39.3910   | -4.3910  |
| 10.0 | D24      | 36.7     | 39.3910   | -2.6910  |



|      |     |      |         |          |
|------|-----|------|---------|----------|
| 17.0 | D24 | 6.6  | 20.8737 | -14.2737 |
| 0.1  | DCP | 1.4  | 0.2526  | 1.1474   |
| 0.1  | DCP | 1.6  | 0.2526  | 1.3474   |
| 0.3  | DCP | 2.5  | 0.7392  | 1.7608   |
| 0.3  | DCP | 2.4  | 0.7392  | 1.6608   |
| 1.0  | DCP | 2.9  | 2.2583  | 0.6417   |
| 1.0  | DCP | 3.1  | 2.2583  | 0.8417   |
| 3.0  | DCP | 4.4  | 5.2867  | -0.8867  |
| 3.0  | DCP | 4.2  | 5.2867  | -1.0867  |
| 5.0  | DCP | 5.8  | 6.8863  | -1.0863  |
| 5.0  | DCP | 5.4  | 6.8863  | -1.4863  |
| 10.0 | DCP | 8.2  | 7.4871  | 0.7129   |
| 10.0 | DCP | 8.7  | 7.4871  | 1.2129   |
| 17.0 | DCP | 5.8  | 5.5086  | 0.2914   |
| 3.0  | DCA | 0.5  | 1.4139  | -0.9139  |
| 3.0  | DCA | 0.5  | 1.4139  | -0.9139  |
| 5.0  | DCA | 3.2  | 3.3238  | -0.1238  |
| 5.0  | DCA | 3.5  | 3.3238  | 0.1762   |
| 10.0 | DCA | 9.5  | 8.8998  | 0.6002   |
| 10.0 | DCA | 9.1  | 8.8998  | 0.2002   |
| 17.0 | DCA | 15.0 | 15.2249 | -0.2249  |

**Listing 18:** SFO-SFO-SFO fit to Fayette data, two-component error

```

mkin version used for fitting: 1.0.4.9000
R version used for fitting: 4.1.0
Date of fit: Mon Jul 26 12:18:41 2021
Date of summary: Mon Jul 26 18:52:52 2021

Equations:
d_D24/dt = - k_D24 * D24
d_DCP/dt = + f_D24_to_DCP * k_D24 * D24 - k_DCP * DCP
d_DCA/dt = + f_DCP_to_DCA * k_DCP * DCP - k_DCA * DCA

Model predictions using solution type deSolve

Fitted using 2542 model solutions performed in 2.555 s

Error model: Two-component variance function

Error model algorithm: d_3
Direct fitting and three-step fitting yield approximately the same likelihood

Starting values for parameters to be optimised:
      value  type
D24_0      100.9000 state
k_D24        0.1000 deparm
k_DCP        0.1001 deparm
k_DCA        0.1002 deparm
f_D24_to_DCP 0.5000 deparm
f_DCP_to_DCA 0.5000 deparm
sigma_low    0.1000 error
rsd_high     0.1000 error

Starting values for the transformed parameters actually optimised:
      value lower upper
D24_0      100.900000 -Inf  Inf
log_k_D24   -2.302585 -Inf  Inf
log_k_DCP   -2.301586 -Inf  Inf
log_k_DCA   -2.300587 -Inf  Inf
f_D24_qlogis 0.000000 -Inf  Inf
f_DCP_qlogis 0.000000 -Inf  Inf
sigma_low    0.100000  0    Inf
rsd_high     0.100000  0    Inf

Fixed parameter values:
      value type
DCP_0      0 state
DCA_0      0 state

Warning(s):
Observations with value of zero were removed from the data

Results:

      AIC      BIC  logLik
193.4438 205.8866 -88.7219

Optimised, transformed parameters with symmetric confidence intervals:
      Estimate Std. Error Lower Upper
D24_0      101.300  5.083e+00  9.083e+01 111.7000
log_k_D24   -2.192  8.970e-02 -2.376e+00 -2.0080
log_k_DCP   -1.945  1.046e-01 -2.160e+00 -1.7310
log_k_DCA   -21.020  9.477e+03 -1.947e+04 19420.0000
f_D24_qlogis -1.190  1.459e-01 -1.490e+00 -0.8911
f_DCP_qlogis 19.360  9.047e+03 -1.854e+04 18580.0000
sigma_low    1.065  2.365e-01  5.801e-01  1.5510
rsd_high     0.142  2.668e-02  8.723e-02  0.1967

```

## Parameter correlation:

|              | D24_0        | log_k_D24  | log_k_DCP  | log_k_DCA  | f_D24_qlogis |
|--------------|--------------|------------|------------|------------|--------------|
| D24_0        | 1.000e+00    | 6.755e-01  | -0.1178615 | -3.697e-05 | -0.7621514   |
| log_k_D24    | 6.755e-01    | 1.000e+00  | -0.1844587 | -5.160e-05 | -0.7749053   |
| log_k_DCP    | -1.179e-01   | -1.845e-01 | 1.0000000  | 2.398e-04  | 0.1712929    |
| log_k_DCA    | -3.697e-05   | -5.160e-05 | 0.0002398  | 1.000e+00  | 0.0001888    |
| f_D24_qlogis | -7.622e-01   | -7.749e-01 | 0.1712929  | 1.888e-04  | 1.0000000    |
| f_DCP_qlogis | 2.682e-05    | 3.469e-05  | -0.0002668 | -1.400e-05 | -0.0001786   |
| sigma_low    | 5.408e-02    | 2.190e-02  | 0.0508735  | 1.402e-05  | -0.0475623   |
| rsd_high     | -1.531e-01   | -1.685e-02 | -0.0450757 | 1.545e-05  | 0.0399865    |
|              | f_DCP_qlogis | sigma_low  | rsd_high   |            |              |
| D24_0        | 2.682e-05    | 5.408e-02  | -1.531e-01 |            |              |
| log_k_D24    | 3.469e-05    | 2.190e-02  | -1.685e-02 |            |              |
| log_k_DCP    | -2.668e-04   | 5.087e-02  | -4.508e-02 |            |              |
| log_k_DCA    | -1.400e-05   | 1.402e-05  | 1.545e-05  |            |              |
| f_D24_qlogis | -1.786e-04   | -4.756e-02 | 3.999e-02  |            |              |
| f_DCP_qlogis | 1.000e+00    | -5.505e-06 | -2.432e-05 |            |              |
| sigma_low    | -5.505e-06   | 1.000e+00  | -2.921e-01 |            |              |
| rsd_high     | -2.432e-05   | -2.921e-01 | 1.000e+00  |            |              |

## Backtransformed parameters:

Confidence intervals for internally transformed parameters are asymmetric.  
t-test (unrealistically) based on the assumption of normal distribution  
for estimators of untransformed parameters.

|              | Estimate  | t value   | Pr(>t)    | Lower    | Upper    |
|--------------|-----------|-----------|-----------|----------|----------|
| D24_0        | 1.013e+02 | 1.950e+01 | 9.706e-18 | 90.83000 | 111.7000 |
| k_D24        | 1.117e-01 | 1.075e+01 | 1.471e-11 | 0.09293  | 0.1343   |
| k_DCP        | 1.429e-01 | 4.099e+00 | 1.704e-04 | 0.11530  | 0.1771   |
| k_DCA        | 7.463e-10 | 1.878e-08 | 5.000e-01 | 0.00000  | Inf      |
| f_D24_to_DCP | 2.332e-01 | 5.226e+00 | 8.311e-06 | 0.18390  | 0.2909   |
| f_DCP_to_DCA | 1.000e+00 | 2.760e+00 | 5.131e-03 | 0.00000  | 1.0000   |
| sigma_low    | 1.065e+00 | 4.496e+00 | 5.893e-05 | 0.58010  | 1.5510   |
| rsd_high     | 1.420e-01 | 5.216e+00 | 8.537e-06 | 0.08723  | 0.1967   |

## FOCUS Chi2 error levels in percent:

|          | err.min | n.optim | df |
|----------|---------|---------|----|
| All data | 12.885  | 6       | 13 |
| D24      | 7.880   | 2       | 6  |
| DCP      | 20.744  | 2       | 5  |
| DCA      | 6.943   | 2       | 2  |

## Resulting formation fractions:

|          | ff        |
|----------|-----------|
| D24_DCP  | 2.332e-01 |
| D24_sink | 7.668e-01 |
| DCP_DCA  | 1.000e+00 |
| DCP_sink | 3.927e-09 |

## Estimated disappearance times:

|     | DT50      | DT90      |
|-----|-----------|-----------|
| D24 | 6.205e+00 | 2.061e+01 |
| DCP | 4.850e+00 | 1.611e+01 |
| DCA | 9.288e+08 | 3.085e+09 |

## Data:

| time | variable | observed | predicted | residual |
|------|----------|----------|-----------|----------|
| 0.0  | D24      | 100.8    | 101.2610  | -0.46101 |
| 0.0  | D24      | 101.0    | 101.2610  | -0.26101 |
| 0.1  | D24      | 93.2     | 100.1361  | -6.93612 |
| 0.1  | D24      | 93.2     | 100.1361  | -6.93612 |
| 0.3  | D24      | 90.5     | 97.9237   | -7.42371 |
| 0.3  | D24      | 91.5     | 97.9237   | -6.42371 |
| 1.0  | D24      | 86.3     | 90.5582   | -4.25817 |
| 1.0  | D24      | 87.1     | 90.5582   | -3.45817 |
| 3.0  | D24      | 79.0     | 72.4267   | 6.57333  |
| 3.0  | D24      | 80.8     | 72.4267   | 8.37333  |
| 5.0  | D24      | 74.0     | 57.9254   | 16.07456 |
| 5.0  | D24      | 65.6     | 57.9254   | 7.67456  |

|      |     |      |         |          |
|------|-----|------|---------|----------|
| 10.0 | D24 | 35.0 | 33.1357 | 1.86427  |
| 10.0 | D24 | 36.7 | 33.1357 | 3.56427  |
| 17.0 | D24 | 6.6  | 15.1598 | -8.55983 |
| 0.1  | DCP | 1.4  | 0.2604  | 1.13958  |
| 0.1  | DCP | 1.6  | 0.2604  | 1.33958  |
| 0.3  | DCP | 2.5  | 0.7616  | 1.73837  |
| 0.3  | DCP | 2.4  | 0.7616  | 1.63837  |
| 1.0  | DCP | 2.9  | 2.3224  | 0.57761  |
| 1.0  | DCP | 3.1  | 2.3224  | 0.77761  |
| 3.0  | DCP | 4.4  | 5.4027  | -1.00266 |
| 3.0  | DCP | 4.2  | 5.4027  | -1.20266 |
| 5.0  | DCP | 5.8  | 6.9847  | -1.18473 |
| 5.0  | DCP | 5.4  | 6.9847  | -1.58473 |
| 10.0 | DCP | 8.2  | 7.4136  | 0.78640  |
| 10.0 | DCP | 8.7  | 7.4136  | 1.28640  |
| 17.0 | DCP | 5.8  | 5.2088  | 0.59117  |
| 3.0  | DCA | 0.5  | 1.3208  | -0.82077 |
| 3.0  | DCA | 0.5  | 1.3208  | -0.82077 |
| 5.0  | DCA | 3.2  | 3.1200  | 0.07999  |
| 5.0  | DCA | 3.5  | 3.1200  | 0.37999  |
| 10.0 | DCA | 9.5  | 8.4715  | 1.02852  |
| 10.0 | DCA | 9.1  | 8.4715  | 0.62852  |
| 17.0 | DCA | 15.0 | 14.8678 | 0.13224  |

**Listing 19:** SFO-SFO(ns)-SFO fit to Fayette data, two-component error

```

mkin version used for fitting: 1.0.4.9000
R version used for fitting: 4.1.0
Date of fit: Mon Jul 26 12:18:40 2021
Date of summary: Mon Jul 26 18:52:52 2021

Equations:
d_D24/dt = - k_D24 * D24
d_DCP/dt = + f_D24_to_DCP * k_D24 * D24 - k_DCP * DCP
d_DCA/dt = + k_DCP * DCP - k_DCA * DCA

Model predictions using solution type deSolve

Fitted using 1811 model solutions performed in 1.828 s

Error model: Two-component variance function

Error model algorithm: d_3
Direct fitting and three-step fitting yield approximately the same likelihood

Starting values for parameters to be optimised:
      value  type
D24_0    100.9000 state
k_D24      0.1000 deparm
k_DCP      0.1001 deparm
k_DCA      0.1002 deparm
f_D24_to_DCP 0.5000 deparm
sigma_low  0.1000 error
rsd_high   0.1000 error

Starting values for the transformed parameters actually optimised:
      value lower upper
D24_0    100.9000000 -Inf  Inf
log_k_D24 -2.302585 -Inf  Inf
log_k_DCP -2.301586 -Inf  Inf
log_k_DCA -2.300587 -Inf  Inf
f_D24_qlogis 0.0000000 -Inf  Inf
sigma_low  0.1000000  0    Inf
rsd_high   0.1000000  0    Inf

Fixed parameter values:
      value  type
DCP_0      0 state
DCA_0      0 state

Warning(s):
Observations with value of zero were removed from the data

Results:
      AIC      BIC  logLik
191.4438 202.3312 -88.7219

Optimised, transformed parameters with symmetric confidence intervals:
      Estimate Std. Error   Lower   Upper
D24_0    101.300  5.083e+00  9.085e+01  111.7000
log_k_D24 -2.192  8.970e-02 -2.376e+00  -2.0080
log_k_DCP -1.945  1.046e-01 -2.160e+00  -1.7310
log_k_DCA -20.930  9.092e+03 -1.865e+04  18600.0000
f_D24_qlogis -1.190  1.459e-01 -1.489e+00  -0.8916
sigma_low  1.065  2.365e-01  5.809e-01  1.5500
rsd_high   0.142  2.668e-02  8.732e-02  0.1966

Parameter correlation:
      D24_0 log_k_D24 log_k_DCP log_k_DCA f_D24_qlogis

```

```

D24_0      1.000e+00  6.755e-01 -0.1178615 -3.853e-05 -0.7621515
log_k_D24   6.755e-01  1.000e+00 -0.1844588 -5.378e-05 -0.7749054
log_k_DCP  -1.179e-01 -1.845e-01  1.0000000  2.499e-04  0.1712929
log_k_DCA  -3.853e-05 -5.378e-05  0.0002499  1.000e+00  0.0001968
f_D24_qlogis -7.622e-01 -7.749e-01  0.1712929  1.968e-04  1.0000000
sigma_low   5.408e-02  2.190e-02  0.0508733  1.462e-05 -0.0475624
rsd_high    -1.531e-01 -1.685e-02 -0.0450755  1.611e-05  0.0399871
sigma_low   5.408e-02 -1.531e-01
log_k_D24   2.190e-02 -1.685e-02
log_k_DCP   5.087e-02 -4.508e-02
log_k_DCA   1.462e-05  1.611e-05
f_D24_qlogis -4.756e-02  3.999e-02
sigma_low   1.000e+00 -2.921e-01
rsd_high    -2.921e-01  1.000e+00

```

Backtransformed parameters:

Confidence intervals for internally transformed parameters are asymmetric.  
t-test (unrealistically) based on the assumption of normal distribution  
for estimators of untransformed parameters.

|              | Estimate  | t value   | Pr(>t)    | Lower    | Upper    |
|--------------|-----------|-----------|-----------|----------|----------|
| D24_0        | 1.013e+02 | 1.968e+01 | 3.104e-18 | 90.85000 | 111.7000 |
| k_D24        | 1.117e-01 | 1.089e+01 | 7.114e-12 | 0.09296  | 0.1342   |
| k_DCP        | 1.429e-01 | 6.687e+00 | 1.470e-07 | 0.11540  | 0.1771   |
| k_DCA        | 8.108e-10 | 2.690e-08 | 5.000e-01 | 0.00000  | Inf      |
| f_D24_to_DCP | 2.332e-01 | 6.964e+00 | 7.137e-08 | 0.18400  | 0.2908   |
| sigma_low    | 1.065e+00 | 4.496e+00 | 5.488e-05 | 0.58090  | 1.5500   |
| rsd_high     | 1.420e-01 | 5.310e+00 | 5.948e-06 | 0.08732  | 0.1966   |

FOCUS Chi2 error levels in percent:

|          | err.min | n.optim | df |
|----------|---------|---------|----|
| All data | 12.52   | 5       | 14 |
| D24      | 7.88    | 2       | 6  |
| DCP      | 20.74   | 2       | 5  |
| DCA      | 6.08    | 1       | 3  |

Resulting formation fractions:

```

ff
D24_DCP 0.2332
D24_sink 0.7668

```

Estimated disappearance times:

|     | DT50      | DT90      |
|-----|-----------|-----------|
| D24 | 6.205e+00 | 2.061e+01 |
| DCP | 4.850e+00 | 1.611e+01 |
| DCA | 8.549e+08 | 2.840e+09 |

Data:

| time | variable | observed | predicted | residual |
|------|----------|----------|-----------|----------|
| 0.0  | D24      | 100.8    | 101.2610  | -0.46100 |
| 0.0  | D24      | 101.0    | 101.2610  | -0.26100 |
| 0.1  | D24      | 93.2     | 100.1361  | -6.93612 |
| 0.1  | D24      | 93.2     | 100.1361  | -6.93612 |
| 0.3  | D24      | 90.5     | 97.9237   | -7.42371 |
| 0.3  | D24      | 91.5     | 97.9237   | -6.42371 |
| 1.0  | D24      | 86.3     | 90.5582   | -4.25817 |
| 1.0  | D24      | 87.1     | 90.5582   | -3.45817 |
| 3.0  | D24      | 79.0     | 72.4267   | 6.57333  |
| 3.0  | D24      | 80.8     | 72.4267   | 8.37333  |
| 5.0  | D24      | 74.0     | 57.9254   | 16.07455 |
| 5.0  | D24      | 65.6     | 57.9254   | 7.67455  |
| 10.0 | D24      | 35.0     | 33.1357   | 1.86427  |
| 10.0 | D24      | 36.7     | 33.1357   | 3.56427  |
| 17.0 | D24      | 6.6      | 15.1598   | -8.55984 |
| 0.1  | DCP      | 1.4      | 0.2604    | 1.13958  |
| 0.1  | DCP      | 1.6      | 0.2604    | 1.33958  |
| 0.3  | DCP      | 2.5      | 0.7616    | 1.73837  |
| 0.3  | DCP      | 2.4      | 0.7616    | 1.63837  |
| 1.0  | DCP      | 2.9      | 2.3224    | 0.57761  |

|      |     |      |         |          |
|------|-----|------|---------|----------|
| 1.0  | DCP | 3.1  | 2.3224  | 0.77761  |
| 3.0  | DCP | 4.4  | 5.4027  | -1.00266 |
| 3.0  | DCP | 4.2  | 5.4027  | -1.20266 |
| 5.0  | DCP | 5.8  | 6.9847  | -1.18473 |
| 5.0  | DCP | 5.4  | 6.9847  | -1.58473 |
| 10.0 | DCP | 8.2  | 7.4136  | 0.78640  |
| 10.0 | DCP | 8.7  | 7.4136  | 1.28640  |
| 17.0 | DCP | 5.8  | 5.2088  | 0.59117  |
| 3.0  | DCA | 0.5  | 1.3208  | -0.82077 |
| 3.0  | DCA | 0.5  | 1.3208  | -0.82077 |
| 5.0  | DCA | 3.2  | 3.1200  | 0.07999  |
| 5.0  | DCA | 3.5  | 3.1200  | 0.37999  |
| 10.0 | DCA | 9.5  | 8.4715  | 1.02852  |
| 10.0 | DCA | 9.1  | 8.4715  | 0.62852  |
| 17.0 | DCA | 15.0 | 14.8678 | 0.13224  |

**Listing 20:** SFO-SFO-SFO fit to RefSol 03-G data, variance by variable

```

mkin version used for fitting: 1.0.4.9000
R version used for fitting: 4.1.0
Date of fit: Mon Jul 26 12:18:33 2021
Date of summary: Mon Jul 26 18:52:52 2021

Equations:
d_D24/dt = - k_D24 * D24
d_DCP/dt = + f_D24_to_DCP * k_D24 * D24 - k_DCP * DCP
d_DCA/dt = + f_DCP_to_DCA * k_DCP * DCP - k_DCA * DCA

Model predictions using solution type deSolve

Fitted using 2842 model solutions performed in 3.003 s

Error model: Variance unique to each observed variable

Error model algorithm: d_3
Direct fitting and three-step fitting yield approximately the same likelihood

Starting values for parameters to be optimised:
      value  type
D24_0      98.8000 state
k_D24       0.1000 deparm
k_DCP       0.1001 deparm
k_DCA       0.1002 deparm
f_D24_to_DCP 0.5000 deparm
f_DCP_to_DCA 0.5000 deparm
sigma_D24    3.0000 error
sigma_DCP    3.0000 error
sigma_DCA    3.0000 error

Starting values for the transformed parameters actually optimised:
      value lower upper
D24_0      98.800000 -Inf  Inf
log_k_D24  -2.302585 -Inf  Inf
log_k_DCP  -2.301586 -Inf  Inf
log_k_DCA  -2.300587 -Inf  Inf
f_D24_qlogis 0.000000 -Inf  Inf
f_DCP_qlogis 0.000000 -Inf  Inf
sigma_D24    3.000000  0  Inf
sigma_DCP    3.000000  0  Inf
sigma_DCA    3.000000  0  Inf

Fixed parameter values:
      value  type
DCP_0      0 state
DCA_0      0 state

Warning(s):
Observations with value of zero were removed from the data

Results:
      AIC      BIC    logLik
197.1267 213.3867 -89.56337

Optimised, transformed parameters with symmetric confidence intervals:
      Estimate Std. Error  Lower  Upper
D24_0      92.9300      1.60800 89.67000 96.19000
log_k_D24   -0.8518      0.06394 -0.98150 -0.7221
log_k_DCP    0.7646      0.36370  0.02694  1.5020
log_k_DCA   -2.9420      0.13280 -3.21200 -2.6730
f_D24_qlogis  1.0890      1.08400 -1.10900  3.2870
f_DCP_qlogis -1.4830      0.36770 -2.22900 -0.7375

```



|           |        |         |         |        |
|-----------|--------|---------|---------|--------|
| sigma_D24 | 3.5230 | 0.60420 | 2.29800 | 4.7480 |
| sigma_DCP | 1.7660 | 0.37060 | 1.01400 | 2.5170 |
| sigma_DCA | 0.7225 | 0.16610 | 0.38560 | 1.0590 |

Parameter correlation:

|              | D24_0     | log_k_D24 | log_k_DCP | log_k_DCA | f_D24_qlogis | f_DCP_qlogis |
|--------------|-----------|-----------|-----------|-----------|--------------|--------------|
| D24_0        | 1.000000  | 0.501106  | -0.062296 | -0.151662 | -0.205399    | 0.089654     |
| log_k_D24    | 0.501106  | 1.000000  | -0.124317 | -0.302655 | -0.315126    | 0.178912     |
| log_k_DCP    | -0.062296 | -0.124317 | 1.000000  | -0.423325 | 0.905409     | -0.924105    |
| log_k_DCA    | -0.151662 | -0.302655 | -0.423325 | 1.000000  | -0.310183    | 0.477189     |
| f_D24_qlogis | -0.205399 | -0.315126 | 0.905409  | -0.310183 | 1.000000     | -0.973337    |
| f_DCP_qlogis | 0.089654  | 0.178912  | -0.924105 | 0.477189  | -0.973337    | 1.000000     |
| sigma_D24    | 0.004614  | 0.009208  | -0.001145 | -0.002787 | -0.002902    | 0.001647     |
| sigma_DCP    | 0.061166  | 0.122062  | 0.459112  | -0.258996 | 0.378827     | -0.412617    |
| sigma_DCA    | -0.068930 | -0.137555 | -0.482488 | 0.275532  | -0.396206    | 0.433023     |

  

|              | sigma_D24 | sigma_DCP | sigma_DCA |
|--------------|-----------|-----------|-----------|
| D24_0        | 0.004614  | 0.061166  | -0.068930 |
| log_k_D24    | 0.009208  | 0.122062  | -0.137555 |
| log_k_DCP    | -0.001145 | 0.459112  | -0.482488 |
| log_k_DCA    | -0.002787 | -0.258996 | 0.275532  |
| f_D24_qlogis | -0.002902 | 0.378827  | -0.396206 |
| f_DCP_qlogis | 0.001647  | -0.412617 | 0.433023  |
| sigma_D24    | 1.000000  | 0.001124  | -0.001267 |
| sigma_DCP    | 0.001124  | 1.000000  | -0.257458 |
| sigma_DCA    | -0.001267 | -0.257458 | 1.000000  |

Backtransformed parameters:

Confidence intervals for internally transformed parameters are asymmetric.  
t-test (unrealistically) based on the assumption of normal distribution  
for estimators of untransformed parameters.

|              | Estimate | t value | Pr(>t)    | Lower    | Upper    |
|--------------|----------|---------|-----------|----------|----------|
| D24_0        | 92.93000 | 57.770  | 2.134e-37 | 89.67000 | 96.19000 |
| k_D24        | 0.42670  | 15.640  | 6.245e-18 | 0.37480  | 0.48570  |
| k_DCP        | 2.14800  | 2.749   | 4.640e-03 | 1.02700  | 4.49200  |
| k_DCA        | 0.05274  | 7.531   | 3.346e-09 | 0.04029  | 0.06904  |
| f_D24_to_DCP | 0.74820  | 3.663   | 3.974e-04 | 0.24800  | 0.96400  |
| f_DCP_to_DCA | 0.18500  | 3.337   | 9.879e-04 | 0.09720  | 0.32360  |
| sigma_D24    | 3.52300  | 5.831   | 5.850e-07 | 2.29800  | 4.74800  |
| sigma_DCP    | 1.76600  | 4.764   | 1.540e-05 | 1.01400  | 2.51700  |
| sigma_DCA    | 0.72250  | 4.349   | 5.374e-05 | 0.38560  | 1.05900  |

FOCUS Chi2 error levels in percent:

|          | err.min | n.optim | df |
|----------|---------|---------|----|
| All data | 11.427  | 6       | 18 |
| D24      | 6.393   | 2       | 7  |
| DCP      | 35.109  | 2       | 6  |
| DCA      | 9.389   | 2       | 5  |

Resulting formation fractions:

ff  
D24\_DCP 0.7482  
D24\_sink 0.2518  
DCP\_DCA 0.1850  
DCP\_sink 0.8150

Estimated disappearance times:

|     | DT50    | DT90   |
|-----|---------|--------|
| D24 | 1.6246  | 5.397  |
| DCP | 0.3227  | 1.072  |
| DCA | 13.1424 | 43.658 |

Data:

| time | variable | observed | predicted | residual |
|------|----------|----------|-----------|----------|
| 0.0  | D24      | 98.8     | 9.293e+01 | 5.87188  |
| 0.0  | D24      | 98.8     | 9.293e+01 | 5.87188  |
| 0.1  | D24      | 87.4     | 8.905e+01 | -1.64670 |
| 0.1  | D24      | 87.9     | 8.905e+01 | -1.14670 |
| 0.3  | D24      | 78.1     | 8.176e+01 | -3.66344 |
| 0.3  | D24      | 78.8     | 8.176e+01 | -2.96344 |

|      |     |      |           |          |
|------|-----|------|-----------|----------|
| 1.0  | D24 | 57.1 | 6.065e+01 | -3.55321 |
| 1.0  | D24 | 56.1 | 6.065e+01 | -4.55321 |
| 3.0  | D24 | 25.0 | 2.584e+01 | -0.83848 |
| 3.0  | D24 | 32.3 | 2.584e+01 | 6.46152  |
| 5.0  | D24 | 14.7 | 1.101e+01 | 3.69271  |
| 10.0 | D24 | 3.1  | 1.304e+00 | 1.79619  |
| 10.0 | D24 | 3.1  | 1.304e+00 | 1.79619  |
| 17.0 | D24 | 2.7  | 6.579e-02 | 2.63421  |
| 17.0 | D24 | 2.1  | 6.579e-02 | 2.03421  |
| 26.0 | D24 | 2.0  | 1.414e-03 | 1.99859  |
| 26.0 | D24 | 2.2  | 1.414e-03 | 2.19859  |
| 0.1  | DCP | 2.8  | 2.611e+00 | 0.18875  |
| 0.1  | DCP | 2.5  | 2.611e+00 | -0.11125 |
| 0.3  | DCP | 5.5  | 6.115e+00 | -0.61543 |
| 0.3  | DCP | 5.4  | 6.115e+00 | -0.71543 |
| 1.0  | DCP | 8.5  | 9.236e+00 | -0.73581 |
| 1.0  | DCP | 8.6  | 9.236e+00 | -0.63581 |
| 3.0  | DCP | 6.7  | 4.764e+00 | 1.93624  |
| 3.0  | DCP | 5.3  | 4.764e+00 | 0.53624  |
| 5.0  | DCP | 5.7  | 2.041e+00 | 3.65933  |
| 10.0 | DCP | 3.2  | 2.418e-01 | 2.95824  |
| 10.0 | DCP | 2.7  | 2.418e-01 | 2.45824  |
| 17.0 | DCP | 2.3  | 1.220e-02 | 2.28780  |
| 17.0 | DCP | 1.7  | 1.220e-02 | 1.68780  |
| 26.0 | DCP | 1.3  | 2.622e-04 | 1.29974  |
| 26.0 | DCP | 1.7  | 2.622e-04 | 1.69974  |
| 0.3  | DCA | 0.5  | 4.116e-01 | 0.08844  |
| 0.3  | DCA | 0.5  | 4.116e-01 | 0.08844  |
| 1.0  | DCA | 3.3  | 2.700e+00 | 0.59961  |
| 1.0  | DCA | 3.7  | 2.700e+00 | 0.99961  |
| 3.0  | DCA | 8.0  | 7.755e+00 | 0.24464  |
| 3.0  | DCA | 7.0  | 7.755e+00 | -0.75536 |
| 5.0  | DCA | 10.6 | 9.387e+00 | 1.21307  |
| 10.0 | DCA | 7.7  | 8.620e+00 | -0.92014 |
| 10.0 | DCA | 7.9  | 8.620e+00 | -0.72014 |
| 17.0 | DCA | 5.2  | 6.124e+00 | -0.92368 |
| 17.0 | DCA | 6.7  | 6.124e+00 | 0.57632  |
| 26.0 | DCA | 4.6  | 3.817e+00 | 0.78274  |
| 26.0 | DCA | 4.2  | 3.817e+00 | 0.38274  |

**Listing 21:** SFO-SFO(ns)-SFO fit to RefSol 03-G data, variance by variable

```

mkin version used for fitting: 1.0.4.9000
R version used for fitting: 4.1.0
Date of fit: Mon Jul 26 12:18:31 2021
Date of summary: Mon Jul 26 18:52:52 2021

Equations:
d_D24/dt = - k_D24 * D24
d_DCP/dt = + f_D24_to_DCP * k_D24 * D24 - k_DCP * DCP
d_DCA/dt = + k_DCP * DCP - k_DCA * DCA

Model predictions using solution type deSolve

Fitted using 1405 model solutions performed in 1.464 s

Error model: Variance unique to each observed variable

Error model algorithm: d_3
Direct fitting and three-step fitting yield approximately the same likelihood

Starting values for parameters to be optimised:
      value  type
D24_0      98.8000 state
k_D24       0.1000 deparm
k_DCP       0.1001 deparm
k_DCA       0.1002 deparm
f_D24_to_DCP 0.5000 deparm
sigma_D24    3.0000 error
sigma_DCP    3.0000 error
sigma_DCA    3.0000 error

Starting values for the transformed parameters actually optimised:
      value lower upper
D24_0      98.800000 -Inf  Inf
log_k_D24  -2.302585 -Inf  Inf
log_k_DCP  -2.301586 -Inf  Inf
log_k_DCA  -2.300587 -Inf  Inf
f_D24_qlogis 0.000000 -Inf  Inf
sigma_D24    3.000000  0  Inf
sigma_DCP    3.000000  0  Inf
sigma_DCA    3.000000  0  Inf

Fixed parameter values:
      value type
DCP_0      0 state
DCA_0      0 state

Warning(s):
Observations with value of zero were removed from the data

Results:

      AIC      BIC    logLik
221.0217 235.475 -102.5108

Optimised, transformed parameters with symmetric confidence intervals:
      Estimate Std. Error Lower Upper
D24_0      93.3600    1.6500 90.0200 96.7000
log_k_D24   -0.8176    0.0682 -0.9557 -0.6794
log_k_DCP   -0.8092    0.1814 -1.1770 -0.4417
log_k_DCA   -2.1610    0.2112 -2.5890 -1.7330
f_D24_qlogis -1.2230    0.1606 -1.5490 -0.8980
sigma_D24    3.5550    0.6212  2.2960  4.8130
sigma_DCP    2.0220    0.3958  1.2200  2.8240
sigma_DCA    1.6530    0.3540  0.9361  2.3710

```

## Parameter correlation:

|              | D24_0     | log_k_D24 | log_k_DCP | log_k_DCA | f_D24_qlogis | sigma_D24 |
|--------------|-----------|-----------|-----------|-----------|--------------|-----------|
| D24_0        | 1.00000   | 0.51833   | -0.04392  | -0.12749  | -0.29327     | 0.09984   |
| log_k_D24    | 0.51833   | 1.00000   | -0.08473  | -0.24597  | -0.36481     | 0.19262   |
| log_k_DCP    | -0.04392  | -0.08473  | 1.00000   | -0.04777  | -0.04692     | -0.01632  |
| log_k_DCA    | -0.12749  | -0.24597  | -0.04777  | 1.00000   | 0.80824      | -0.04738  |
| f_D24_qlogis | -0.29327  | -0.36481  | -0.04692  | 0.80824   | 1.00000      | -0.07027  |
| sigma_D24    | 0.09984   | 0.19262   | -0.01632  | -0.04738  | -0.07027     | 1.00000   |
| sigma_DCP    | -0.03099  | -0.05979  | 0.14224   | -0.24893  | -0.29045     | -0.01152  |
| sigma_DCA    | -0.07388  | -0.14254  | -0.13262  | 0.31317   | 0.38139      | -0.02746  |
|              | sigma_DCP | sigma_DCA |           |           |              |           |
| D24_0        | -0.03099  | -0.07388  |           |           |              |           |
| log_k_D24    | -0.05979  | -0.14254  |           |           |              |           |
| log_k_DCP    | 0.14224   | -0.13262  |           |           |              |           |
| log_k_DCA    | -0.24893  | 0.31317   |           |           |              |           |
| f_D24_qlogis | -0.29045  | 0.38139   |           |           |              |           |
| sigma_D24    | -0.01152  | -0.02746  |           |           |              |           |
| sigma_DCP    | 1.00000   | -0.12482  |           |           |              |           |
| sigma_DCA    | -0.12482  | 1.00000   |           |           |              |           |

## Backtransformed parameters:

Confidence intervals for internally transformed parameters are asymmetric.  
t-test (unrealistically) based on the assumption of normal distribution  
for estimators of untransformed parameters.

|              | Estimate | t value | Pr(>t)    | Lower   | Upper   |
|--------------|----------|---------|-----------|---------|---------|
| D24_0        | 93.3600  | 56.580  | 7.699e-38 | 90.0200 | 96.7000 |
| k_D24        | 0.4415   | 14.660  | 2.710e-17 | 0.3845  | 0.5069  |
| k_DCP        | 0.4452   | 5.514   | 1.431e-06 | 0.3083  | 0.6430  |
| k_DCA        | 0.1152   | 4.735   | 1.594e-05 | 0.0751  | 0.1767  |
| f_D24_to_DCP | 0.2273   | 8.060   | 5.771e-10 | 0.1753  | 0.2895  |
| sigma_D24    | 3.5550   | 5.722   | 7.477e-07 | 2.2960  | 4.8130  |
| sigma_DCP    | 2.0220   | 5.109   | 5.036e-06 | 1.2200  | 2.8240  |
| sigma_DCA    | 1.6530   | 4.671   | 1.942e-05 | 0.9361  | 2.3710  |

## FOCUS Chi2 error levels in percent:

|          | err.min | n.optim | df |
|----------|---------|---------|----|
| All data | 11.98   | 5       | 19 |
| D24      | 6.55    | 2       | 7  |
| DCP      | 35.56   | 2       | 6  |
| DCA      | 20.13   | 1       | 6  |

## Resulting formation fractions:

|          | ff     |
|----------|--------|
| D24_DCP  | 0.2273 |
| D24_sink | 0.7727 |

## Estimated disappearance times:

|     | DT50  | DT90   |
|-----|-------|--------|
| D24 | 1.570 | 5.215  |
| DCP | 1.557 | 5.172  |
| DCA | 6.017 | 19.987 |

## Data:

| time | variable | observed | predicted | residual |
|------|----------|----------|-----------|----------|
| 0.0  | D24      | 98.8     | 9.336e+01 | 5.44153  |
| 0.0  | D24      | 98.8     | 9.336e+01 | 5.44153  |
| 0.1  | D24      | 87.4     | 8.933e+01 | -1.92627 |
| 0.1  | D24      | 87.9     | 8.933e+01 | -1.42627 |
| 0.3  | D24      | 78.1     | 8.178e+01 | -3.67679 |
| 0.3  | D24      | 78.8     | 8.178e+01 | -2.97679 |
| 1.0  | D24      | 57.1     | 6.004e+01 | -2.93550 |
| 1.0  | D24      | 56.1     | 6.004e+01 | -3.93550 |
| 3.0  | D24      | 25.0     | 2.483e+01 | 0.17342  |
| 3.0  | D24      | 32.3     | 2.483e+01 | 7.47342  |
| 5.0  | D24      | 14.7     | 1.027e+01 | 4.43342  |
| 10.0 | D24      | 3.1      | 1.129e+00 | 1.97099  |
| 10.0 | D24      | 3.1      | 1.129e+00 | 1.97099  |
| 17.0 | D24      | 2.7      | 5.134e-02 | 2.64866  |

|      |     |      |           |          |
|------|-----|------|-----------|----------|
| 17.0 | D24 | 2.1  | 5.134e-02 | 2.04866  |
| 26.0 | D24 | 2.0  | 9.655e-04 | 1.99903  |
| 26.0 | D24 | 2.2  | 9.655e-04 | 2.19903  |
| 0.1  | DCP | 2.8  | 8.964e-01 | 1.90356  |
| 0.1  | DCP | 2.5  | 8.964e-01 | 1.60356  |
| 0.3  | DCP | 5.5  | 2.461e+00 | 3.03888  |
| 0.3  | DCP | 5.4  | 2.461e+00 | 2.93888  |
| 1.0  | DCP | 8.5  | 6.015e+00 | 2.48516  |
| 1.0  | DCP | 8.6  | 6.015e+00 | 2.58516  |
| 3.0  | DCP | 6.7  | 7.434e+00 | -0.73428 |
| 3.0  | DCP | 5.3  | 7.434e+00 | -2.13428 |
| 5.0  | DCP | 5.7  | 5.105e+00 | 0.59516  |
| 10.0 | DCP | 3.2  | 1.112e+00 | 2.08760  |
| 10.0 | DCP | 2.7  | 1.112e+00 | 1.58760  |
| 17.0 | DCP | 2.3  | 8.489e-02 | 2.21511  |
| 17.0 | DCP | 1.7  | 8.489e-02 | 1.61511  |
| 26.0 | DCP | 1.3  | 2.402e-03 | 1.29760  |
| 26.0 | DCP | 1.7  | 2.402e-03 | 1.69760  |
| 0.3  | DCA | 0.5  | 1.699e-01 | 0.33010  |
| 0.3  | DCA | 0.5  | 1.699e-01 | 0.33010  |
| 1.0  | DCA | 3.3  | 1.498e+00 | 1.80167  |
| 1.0  | DCA | 3.7  | 1.498e+00 | 2.20167  |
| 3.0  | DCA | 8.0  | 7.089e+00 | 0.91065  |
| 3.0  | DCA | 7.0  | 7.089e+00 | -0.08935 |
| 5.0  | DCA | 10.6 | 1.063e+01 | -0.03102 |
| 10.0 | DCA | 7.7  | 1.027e+01 | -2.57296 |
| 10.0 | DCA | 7.9  | 1.027e+01 | -2.37296 |
| 17.0 | DCA | 5.2  | 5.330e+00 | -0.12962 |
| 17.0 | DCA | 6.7  | 5.330e+00 | 1.37038  |
| 26.0 | DCA | 4.6  | 1.934e+00 | 2.66576  |
| 26.0 | DCA | 4.2  | 1.934e+00 | 2.26576  |

**Listing 22:** SFO-SFO-SFO fit to RefSol 03-G data, two-component error

```

mkin version used for fitting: 1.0.4.9000
R version used for fitting: 4.1.0
Date of fit: Mon Jul 26 12:18:40 2021
Date of summary: Mon Jul 26 18:52:52 2021

Equations:
d_D24/dt = - k_D24 * D24
d_DCP/dt = + f_D24_to_DCP * k_D24 * D24 - k_DCP * DCP
d_DCA/dt = + f_DCP_to_DCA * k_DCP * DCP - k_DCA * DCA

Model predictions using solution type deSolve

Fitted using 1591 model solutions performed in 1.725 s

Error model: Two-component variance function

Error model algorithm: d_3
Direct fitting and three-step fitting yield approximately the same likelihood

Starting values for parameters to be optimised:
      value  type
D24_0      98.8000 state
k_D24       0.1000 deparm
k_DCP       0.1001 deparm
k_DCA       0.1002 deparm
f_D24_to_DCP 0.5000 deparm
f_DCP_to_DCA 0.5000 deparm
sigma_low   0.1000 error
rsd_high    0.1000 error

Starting values for the transformed parameters actually optimised:
      value lower upper
D24_0      98.800000 -Inf  Inf
log_k_D24  -2.302585 -Inf  Inf
log_k_DCP  -2.301586 -Inf  Inf
log_k_DCA  -2.300587 -Inf  Inf
f_D24_qlogis 0.000000 -Inf  Inf
f_DCP_qlogis 0.000000 -Inf  Inf
sigma_low   0.100000  0    Inf
rsd_high    0.100000  0    Inf

Fixed parameter values:
      value  type
DCP_0      0 state
DCA_0      0 state

Warning(s):
Observations with value of zero were removed from the data

Results:

      AIC      BIC    logLik
200.7663 215.2196 -92.38315

Optimised, transformed parameters with symmetric confidence intervals:
      Estimate Std. Error Lower Upper
D24_0      89.96000    2.4760 84.94000 94.9800
log_k_D24  -0.98810    0.0507 -1.09100 -0.8854
log_k_DCP   0.46900    0.2738 -0.08575  1.0240
log_k_DCA  -2.79200    0.2202 -3.23800 -2.3460
f_D24_qlogis 0.85450    0.7429 -0.65070  2.3600
f_DCP_qlogis -1.24700    0.3395 -1.93500 -0.5588
sigma_low   1.41300    0.1806  1.04800  1.7790
rsd_high    0.06701    0.0171  0.03236  0.1017

```

## Parameter correlation:

|              | D24_0     | log_k_D24 | log_k_DCP | log_k_DCA | f_D24_qlogis | f_DCP_qlogis |
|--------------|-----------|-----------|-----------|-----------|--------------|--------------|
| D24_0        | 1.00000   | 0.5907    | -0.11715  | -0.06603  | -0.31759     | 0.12457      |
| log_k_D24    | 0.59070   | 1.00000   | -0.19955  | -0.11299  | -0.40119     | 0.21081      |
| log_k_DCP    | -0.11715  | -0.1995   | 1.00000   | -0.22606  | 0.88978      | -0.84960     |
| log_k_DCA    | -0.06603  | -0.1130   | -0.22606  | 1.00000   | -0.16466     | 0.49385      |
| f_D24_qlogis | -0.31759  | -0.4012   | 0.88978   | -0.16466  | 1.00000      | -0.88852     |
| f_DCP_qlogis | 0.12457   | 0.2108    | -0.84960  | 0.49385   | -0.88852     | 1.00000      |
| sigma_low    | 0.13168   | 0.2301    | -0.03789  | -0.01804  | -0.09469     | 0.04903      |
| rsd_high     | -0.26991  | -0.3672   | 0.06039   | 0.02881   | 0.15102      | -0.07817     |
|              | sigma_low | rsd_high  |           |           |              |              |
| D24_0        | 0.13168   | -0.26991  |           |           |              |              |
| log_k_D24    | 0.23015   | -0.36723  |           |           |              |              |
| log_k_DCP    | -0.03789  | 0.06039   |           |           |              |              |
| log_k_DCA    | -0.01804  | 0.02881   |           |           |              |              |
| f_D24_qlogis | -0.09469  | 0.15102   |           |           |              |              |
| f_DCP_qlogis | 0.04903   | -0.07817  |           |           |              |              |
| sigma_low    | 1.00000   | -0.17203  |           |           |              |              |
| rsd_high     | -0.17203  | 1.00000   |           |           |              |              |

## Backtransformed parameters:

Confidence intervals for internally transformed parameters are asymmetric.  
t-test (unrealistically) based on the assumption of normal distribution  
for estimators of untransformed parameters.

|              | Estimate | t value | Pr(>t)    | Lower    | Upper   |
|--------------|----------|---------|-----------|----------|---------|
| D24_0        | 89.96000 | 36.330  | 7.554e-31 | 84.94000 | 94.9800 |
| k_D24        | 0.37230  | 19.720  | 1.584e-21 | 0.33590  | 0.4126  |
| k_DCP        | 1.59800  | 3.652   | 3.998e-04 | 0.91780  | 2.7840  |
| k_DCA        | 0.06131  | 4.541   | 2.885e-05 | 0.03924  | 0.0958  |
| f_D24_to_DCP | 0.70150  | 4.510   | 3.170e-05 | 0.34280  | 0.9137  |
| f_DCP_to_DCA | 0.22330  | 3.792   | 2.672e-04 | 0.12630  | 0.3638  |
| sigma_low    | 1.41300  | 7.826   | 1.159e-09 | 1.04800  | 1.7790  |
| rsd_high     | 0.06701  | 3.918   | 1.852e-04 | 0.03236  | 0.1017  |

## FOCUS Chi2 error levels in percent:

|          | err.min | n.optim | df |
|----------|---------|---------|----|
| All data | 12.195  | 6       | 18 |
| D24      | 7.164   | 2       | 7  |
| DCP      | 29.446  | 2       | 6  |
| DCA      | 11.638  | 2       | 5  |

## Resulting formation fractions:

|          | ff     |
|----------|--------|
| D24_DCP  | 0.7015 |
| D24_sink | 0.2985 |
| DCP_DCA  | 0.2233 |
| DCP_sink | 0.7767 |

## Estimated disappearance times:

|     | DT50    | DT90   |
|-----|---------|--------|
| D24 | 1.8619  | 6.185  |
| DCP | 0.4336  | 1.441  |
| DCA | 11.3049 | 37.554 |

## Data:

| time | variable | observed | predicted | residual |
|------|----------|----------|-----------|----------|
| 0.0  | D24      | 98.8     | 89.959393 | 8.8406   |
| 0.0  | D24      | 98.8     | 89.959393 | 8.8406   |
| 0.1  | D24      | 87.4     | 86.672008 | 0.7280   |
| 0.1  | D24      | 87.9     | 86.672008 | 1.2280   |
| 0.3  | D24      | 78.1     | 80.453239 | -2.3532  |
| 0.3  | D24      | 78.8     | 80.453239 | -1.6532  |
| 1.0  | D24      | 57.1     | 61.996891 | -4.8969  |
| 1.0  | D24      | 56.1     | 61.996891 | -5.8969  |
| 3.0  | D24      | 25.0     | 29.445349 | -4.4453  |
| 3.0  | D24      | 32.3     | 29.445349 | 2.8547   |
| 5.0  | D24      | 14.7     | 13.985033 | 0.7150   |
| 10.0 | D24      | 3.1      | 2.174105  | 0.9259   |

|      |     |      |          |         |
|------|-----|------|----------|---------|
| 10.0 | D24 | 3.1  | 2.174105 | 0.9259  |
| 17.0 | D24 | 2.7  | 0.160526 | 2.5395  |
| 17.0 | D24 | 2.1  | 0.160526 | 1.9395  |
| 26.0 | D24 | 2.0  | 0.005629 | 1.9944  |
| 26.0 | D24 | 2.2  | 0.005629 | 2.1944  |
| 0.1  | DCP | 2.8  | 2.130205 | 0.6698  |
| 0.1  | DCP | 2.5  | 2.130205 | 0.3698  |
| 0.3  | DCP | 5.5  | 5.273871 | 0.2261  |
| 0.3  | DCP | 5.4  | 5.273871 | 0.1261  |
| 1.0  | DCP | 8.5  | 9.330000 | -0.8300 |
| 1.0  | DCP | 8.6  | 9.330000 | -0.7300 |
| 3.0  | DCP | 6.7  | 6.112982 | 0.5870  |
| 3.0  | DCP | 5.3  | 6.112982 | -0.8130 |
| 5.0  | DCP | 5.7  | 2.972119 | 2.7279  |
| 10.0 | DCP | 3.2  | 0.463049 | 2.7370  |
| 10.0 | DCP | 2.7  | 0.463049 | 2.2370  |
| 17.0 | DCP | 2.3  | 0.034189 | 2.2658  |
| 17.0 | DCP | 1.7  | 0.034189 | 1.6658  |
| 26.0 | DCP | 1.3  | 0.001199 | 1.2988  |
| 26.0 | DCP | 1.7  | 0.001199 | 1.6988  |
| 0.3  | DCA | 0.5  | 0.309436 | 0.1906  |
| 0.3  | DCA | 0.5  | 0.309436 | 0.1906  |
| 1.0  | DCA | 3.3  | 2.243075 | 1.0569  |
| 1.0  | DCA | 3.7  | 2.243075 | 1.4569  |
| 3.0  | DCA | 8.0  | 7.433461 | 0.5665  |
| 3.0  | DCA | 7.0  | 7.433461 | -0.4335 |
| 5.0  | DCA | 10.6 | 9.493144 | 1.1069  |
| 10.0 | DCA | 7.7  | 8.970091 | -1.2701 |
| 10.0 | DCA | 7.9  | 8.970091 | -1.0701 |
| 17.0 | DCA | 5.2  | 6.146566 | -0.9466 |
| 17.0 | DCA | 6.7  | 6.146566 | 0.5534  |
| 26.0 | DCA | 4.6  | 3.561014 | 1.0390  |
| 26.0 | DCA | 4.2  | 3.561014 | 0.6390  |



**Listing 23:** SFO-SFO(ns)-SFO fit to RefSol 03-G data, two-component error

```

mkin version used for fitting: 1.0.4.9000
R version used for fitting: 4.1.0
Date of fit: Mon Jul 26 12:18:41 2021
Date of summary: Mon Jul 26 18:52:53 2021

Equations:
d_D24/dt = - k_D24 * D24
d_DCP/dt = + f_D24_to_DCP * k_D24 * D24 - k_DCP * DCP
d_DCA/dt = + k_DCP * DCP - k_DCA * DCA

Model predictions using solution type deSolve

Fitted using 1308 model solutions performed in 1.316 s

Error model: Two-component variance function

Error model algorithm: d_3
Direct fitting and three-step fitting yield approximately the same likelihood

Starting values for parameters to be optimised:
      value  type
D24_0      98.8000 state
k_D24       0.1000 deparm
k_DCP       0.1001 deparm
k_DCA       0.1002 deparm
f_D24_to_DCP 0.5000 deparm
sigma_low   0.1000 error
rsd_high    0.1000 error

Starting values for the transformed parameters actually optimised:
      value lower upper
D24_0      98.800000 -Inf  Inf
log_k_D24   -2.302585 -Inf  Inf
log_k_DCP   -2.301586 -Inf  Inf
log_k_DCA   -2.300587 -Inf  Inf
f_D24_qlogis 0.000000 -Inf  Inf
sigma_low    0.100000  0    Inf
rsd_high     0.100000  0    Inf

Fixed parameter values:
      value  type
DCP_0      0 state
DCA_0      0 state

Warning(s):
Observations with value of zero were removed from the data

Results:
      AIC      BIC    logLik
218.4091 231.0558 -102.2046

Optimised, transformed parameters with symmetric confidence intervals:
      Estimate Std. Error  Lower  Upper
D24_0      91.23000    2.30800 86.56000 95.91000
log_k_D24   -0.93690    0.05327 -1.04500 -0.82900
log_k_DCP   -0.78980    0.18690 -1.16800 -0.41150
log_k_DCA   -2.03800    0.21780 -2.47900 -1.59700
f_D24_qlogis -1.06400    0.16430 -1.39600 -0.73130
sigma_low    1.93300    0.24690  1.43300  2.43300
rsd_high     0.05889    0.01939  0.01964  0.09814

Parameter correlation:
      D24_0 log_k_D24 log_k_DCP log_k_DCA f_D24_qlogis sigma_low

```

```

D24_0      1.000000  0.55065 -0.043425 -0.097570  -0.34705  0.084437
log_k_D24   0.55065  1.000000 -0.079430 -0.178190  -0.36830  0.186367
log_k_DCP  -0.04342  -0.07943  1.000000  0.208877   0.26955  0.001012
log_k_DCA  -0.09757  -0.17819  0.208877  1.000000   0.72682 -0.005355
f_D24_qlogis -0.34705 -0.36830  0.269549  0.726816   1.000000 -0.073147
sigma_low   0.08444  0.18637  0.001012 -0.005355  -0.07315  1.000000
rsd_high   -0.19005 -0.31091 -0.001720  0.008917   0.12203 -0.269874
rsd_high
D24_0      -0.190051
log_k_D24  -0.310908
log_k_DCP  -0.001720
log_k_DCA   0.008917
f_D24_qlogis 0.122034
sigma_low  -0.269874
rsd_high    1.000000

```

Backtransformed parameters:

Confidence intervals for internally transformed parameters are asymmetric.  
t-test (unrealistically) based on the assumption of normal distribution  
for estimators of untransformed parameters.

|              | Estimate | t value | Pr(>t)    | Lower    | Upper    |
|--------------|----------|---------|-----------|----------|----------|
| D24_0        | 91.23000 | 39.520  | 8.936e-33 | 86.56000 | 95.91000 |
| k_D24        | 0.39190  | 18.770  | 4.028e-21 | 0.35180  | 0.43650  |
| k_DCP        | 0.45390  | 5.351   | 2.204e-06 | 0.31100  | 0.66270  |
| k_DCA        | 0.13030  | 4.592   | 2.355e-05 | 0.08383  | 0.20250  |
| f_D24_to_DCP | 0.25660  | 8.187   | 3.238e-10 | 0.19840  | 0.32490  |
| sigma_low    | 1.93300  | 7.828   | 9.599e-10 | 1.43300  | 2.43300  |
| rsd_high     | 0.05889  | 3.037   | 2.149e-03 | 0.01964  | 0.09814  |

FOCUS Chi2 error levels in percent:

|          | err.min | n.optim | df |
|----------|---------|---------|----|
| All data | 12.146  | 5       | 19 |
| D24      | 6.596   | 2       | 7  |
| DCP      | 35.554  | 2       | 6  |
| DCA      | 21.733  | 1       | 6  |

Resulting formation fractions:

```

ff
D24_DCP 0.2566
D24_sink 0.7434

```

Estimated disappearance times:

|     | DT50  | DT90   |
|-----|-------|--------|
| D24 | 1.769 | 5.876  |
| DCP | 1.527 | 5.072  |
| DCA | 5.320 | 17.674 |

Data:

| time | variable | observed | predicted | residual |
|------|----------|----------|-----------|----------|
| 0.0  | D24      | 98.8     | 91.231981 | 7.56802  |
| 0.0  | D24      | 98.8     | 91.231981 | 7.56802  |
| 0.1  | D24      | 87.4     | 87.726189 | -0.32619 |
| 0.1  | D24      | 87.9     | 87.726189 | 0.17381  |
| 0.3  | D24      | 78.1     | 81.113582 | -3.01358 |
| 0.3  | D24      | 78.8     | 81.113582 | -2.31358 |
| 1.0  | D24      | 57.1     | 61.655055 | -4.55506 |
| 1.0  | D24      | 56.1     | 61.655055 | -5.55506 |
| 3.0  | D24      | 25.0     | 28.158652 | -3.15865 |
| 3.0  | D24      | 32.3     | 28.158652 | 4.14135  |
| 5.0  | D24      | 14.7     | 12.860417 | 1.83958  |
| 10.0 | D24      | 3.1      | 1.812855  | 1.28715  |
| 10.0 | D24      | 3.1      | 1.812855  | 1.28715  |
| 17.0 | D24      | 2.7      | 0.116712  | 2.58329  |
| 17.0 | D24      | 2.1      | 0.116712  | 1.98329  |
| 26.0 | D24      | 2.0      | 0.003432  | 1.99657  |
| 26.0 | D24      | 2.2      | 0.003432  | 2.19657  |
| 0.1  | DCP      | 2.8      | 0.879222  | 1.92078  |
| 0.1  | DCP      | 2.5      | 0.879222  | 1.62078  |
| 0.3  | DCP      | 5.5      | 2.423779  | 3.07622  |

|      |     |      |           |          |
|------|-----|------|-----------|----------|
| 0.3  | DCP | 5.4  | 2.423779  | 2.97622  |
| 1.0  | DCP | 8.5  | 6.009952  | 2.49005  |
| 1.0  | DCP | 8.6  | 6.009952  | 2.59005  |
| 3.0  | DCP | 6.7  | 7.748618  | -1.04862 |
| 3.0  | DCP | 5.3  | 7.748618  | -2.44862 |
| 5.0  | DCP | 5.7  | 5.557279  | 0.14272  |
| 10.0 | DCP | 3.2  | 1.357656  | 1.84234  |
| 10.0 | DCP | 2.7  | 1.357656  | 1.34234  |
| 17.0 | DCP | 2.3  | 0.123204  | 2.17680  |
| 17.0 | DCP | 1.7  | 0.123204  | 1.57680  |
| 26.0 | DCP | 1.3  | 0.004450  | 1.29555  |
| 26.0 | DCP | 1.7  | 0.004450  | 1.69555  |
| 0.3  | DCA | 0.5  | 0.169977  | 0.33002  |
| 0.3  | DCA | 0.5  | 0.169977  | 0.33002  |
| 1.0  | DCA | 3.3  | 1.507367  | 1.79263  |
| 1.0  | DCA | 3.7  | 1.507367  | 2.19263  |
| 3.0  | DCA | 8.0  | 7.222529  | 0.77747  |
| 3.0  | DCA | 7.0  | 7.222529  | -0.22253 |
| 5.0  | DCA | 10.6 | 10.911196 | -0.31120 |
| 10.0 | DCA | 7.7  | 10.483923 | -2.78392 |
| 10.0 | DCA | 7.9  | 10.483923 | -2.58392 |
| 17.0 | DCA | 5.2  | 5.133513  | 0.06649  |
| 17.0 | DCA | 6.7  | 5.133513  | 1.56649  |
| 26.0 | DCA | 4.6  | 1.654103  | 2.94590  |
| 26.0 | DCA | 4.2  | 1.654103  | 2.54590  |

**Listing 24:** SFO-SFO-SFO fit to Site E1 data, variance by variable

```

mkin version used for fitting: 1.0.4.9000
R version used for fitting: 4.1.0
Date of fit: Mon Jul 26 12:18:34 2021
Date of summary: Mon Jul 26 18:52:53 2021

Equations:
d_D24/dt = - k_D24 * D24
d_DCP/dt = + f_D24_to_DCP * k_D24 * D24 - k_DCP * DCP
d_DCA/dt = + f_DCP_to_DCA * k_DCP * DCP - k_DCA * DCA

Model predictions using solution type deSolve

Fitted using 2471 model solutions performed in 2.38 s

Error model: Variance unique to each observed variable

Error model algorithm: d_3
Direct fitting and three-step fitting yield approximately the same likelihood

Starting values for parameters to be optimised:
      value  type
D24_0      100.5500 state
k_D24        0.1000 deparm
k_DCP        0.1001 deparm
k_DCA        0.1002 deparm
f_D24_to_DCP 0.5000 deparm
f_DCP_to_DCA 0.5000 deparm
sigma_D24     3.0000 error
sigma_DCP     3.0000 error
sigma_DCA     3.0000 error

Starting values for the transformed parameters actually optimised:
      value lower upper
D24_0      100.550000 -Inf  Inf
log_k_D24   -2.302585 -Inf  Inf
log_k_DCP   -2.301586 -Inf  Inf
log_k_DCA   -2.300587 -Inf  Inf
f_D24_qlogis 0.000000 -Inf  Inf
f_DCP_qlogis 0.000000 -Inf  Inf
sigma_D24     3.000000  0  Inf
sigma_DCP     3.000000  0  Inf
sigma_DCA     3.000000  0  Inf

Fixed parameter values:
      value  type
DCP_0      0 state
DCA_0      0 state

Warning(s):
Observations with value of zero were removed from the data

Results:
      AIC      BIC    logLik
165.9025 181.3247 -73.95127

Optimised, transformed parameters with symmetric confidence intervals:
      Estimate Std. Error   Lower   Upper
D24_0      99.3200  1.377e+00  9.652e+01 102.1000
log_k_D24   -1.1960  5.300e-02 -1.304e+00 -1.0880
log_k_DCP   -0.7960  2.101e-01 -1.224e+00 -0.3680
log_k_DCA   -1.3860  2.540e-01 -1.903e+00 -0.8686
f_D24_qlogis -1.4800  1.927e-01 -1.872e+00 -1.0870
f_DCP_qlogis 20.1100  1.076e+04 -2.189e+04 21930.0000

```

|           |        |           |           |        |
|-----------|--------|-----------|-----------|--------|
| sigma_D24 | 3.1510 | 5.641e-01 | 2.002e+00 | 4.3000 |
| sigma_DCP | 0.5932 | 1.369e-01 | 3.144e-01 | 0.8720 |
| sigma_DCA | 1.4190 | 3.490e-01 | 7.083e-01 | 2.1300 |

Parameter correlation:

|              | D24_0        | log_k_D24  | log_k_DCP  | log_k_DCA  | f_D24_qlogis |
|--------------|--------------|------------|------------|------------|--------------|
| D24_0        | 1.000e+00    | 5.017e-01  | -1.814e-01 | -1.743e-01 | -3.204e-01   |
| log_k_D24    | 5.017e-01    | 1.000e+00  | -3.615e-01 | -3.474e-01 | -5.069e-01   |
| log_k_DCP    | -1.814e-01   | -3.615e-01 | 1.000e+00  | 7.482e-01  | 9.135e-01    |
| log_k_DCA    | -1.743e-01   | -3.474e-01 | 7.482e-01  | 1.000e+00  | 7.969e-01    |
| f_D24_qlogis | -3.204e-01   | -5.069e-01 | 9.135e-01  | 7.969e-01  | 1.000e+00    |
| f_DCP_qlogis | 6.291e-08    | 9.200e-08  | -3.788e-06 | 9.708e-05  | -3.618e-06   |
| sigma_D24    | -7.958e-02   | -1.586e-01 | 5.734e-02  | 5.510e-02  | 8.039e-02    |
| sigma_DCP    | -1.227e-03   | -2.446e-03 | 4.854e-01  | 3.718e-01  | 4.385e-01    |
| sigma_DCA    | 7.849e-02    | 1.564e-01  | -5.490e-01 | -4.313e-01 | -5.237e-01   |
|              | f_DCP_qlogis | sigma_D24  | sigma_DCP  | sigma_DCA  |              |
| D24_0        | 6.291e-08    | -7.958e-02 | -1.227e-03 | 7.849e-02  |              |
| log_k_D24    | 9.200e-08    | -1.586e-01 | -2.446e-03 | 1.564e-01  |              |
| log_k_DCP    | -3.788e-06   | 5.734e-02  | 4.854e-01  | -5.490e-01 |              |
| log_k_DCA    | 9.708e-05    | 5.510e-02  | 3.718e-01  | -4.313e-01 |              |
| f_D24_qlogis | -3.618e-06   | 8.039e-02  | 4.385e-01  | -5.237e-01 |              |
| f_DCP_qlogis | 1.000e+00    | -1.561e-08 | -2.195e-06 | -2.928e-05 |              |
| sigma_D24    | -1.561e-08   | 1.000e+00  | 3.880e-04  | -2.481e-02 |              |
| sigma_DCP    | -2.195e-06   | 3.880e-04  | 1.000e+00  | -2.824e-01 |              |
| sigma_DCA    | -2.928e-05   | -2.481e-02 | -2.824e-01 | 1.000e+00  |              |

Backtransformed parameters:

Confidence intervals for internally transformed parameters are asymmetric.  
t-test (unrealistically) based on the assumption of normal distribution  
for estimators of untransformed parameters.

|              | Estimate | t value | Pr(>t)    | Lower   | Upper    |
|--------------|----------|---------|-----------|---------|----------|
| D24_0        | 99.3200  | 72.160  | 2.639e-37 | 96.5200 | 102.1000 |
| k_D24        | 0.3025   | 18.870  | 3.343e-19 | 0.2716  | 0.3370   |
| k_DCP        | 0.4512   | 4.744   | 2.086e-05 | 0.2941  | 0.6921   |
| k_DCA        | 0.2501   | 1.718   | 4.773e-02 | 0.1491  | 0.4195   |
| f_D24_to_DCP | 0.1855   | 6.352   | 1.964e-07 | 0.1333  | 0.2521   |
| f_DCP_to_DCA | 1.0000   | 2.365   | 1.212e-02 | 0.0000  | 1.0000   |
| sigma_D24    | 3.1510   | 5.585   | 1.809e-06 | 2.0020  | 4.3000   |
| sigma_DCP    | 0.5932   | 4.329   | 6.883e-05 | 0.3144  | 0.8720   |
| sigma_DCA    | 1.4190   | 3.454   | 7.881e-04 | 0.7083  | 2.1300   |

FOCUS Chi2 error levels in percent:

|          | err.min | n.optim | df |
|----------|---------|---------|----|
| All data | 8.848   | 6       | 17 |
| D24      | 4.835   | 2       | 7  |
| DCP      | 17.034  | 2       | 5  |
| DCA      | 31.882  | 2       | 5  |

Resulting formation fractions:

|          | ff        |
|----------|-----------|
| D24_DCP  | 1.855e-01 |
| D24_sink | 8.145e-01 |
| DCP_DCA  | 1.000e+00 |
| DCP_sink | 1.851e-09 |

Estimated disappearance times:

|     | DT50  | DT90  |
|-----|-------|-------|
| D24 | 2.291 | 7.611 |
| DCP | 1.536 | 5.104 |
| DCA | 2.772 | 9.207 |

Data:

| time | variable | observed | predicted | residual |
|------|----------|----------|-----------|----------|
| 0.0  | D24      | 100.2    | 99.32303  | 0.87697  |
| 0.0  | D24      | 100.9    | 99.32303  | 1.57697  |
| 0.1  | D24      | 97.9     | 96.36330  | 1.53670  |
| 0.1  | D24      | 98.3     | 96.36330  | 1.93670  |
| 0.3  | D24      | 92.4     | 90.70580  | 1.69420  |
| 0.3  | D24      | 91.9     | 90.70580  | 1.19420  |

|      |     |      |          |          |
|------|-----|------|----------|----------|
| 1.0  | D24 | 65.8 | 73.39508 | -7.59508 |
| 1.0  | D24 | 69.5 | 73.39508 | -3.89508 |
| 3.0  | D24 | 37.5 | 40.07753 | -2.57753 |
| 3.0  | D24 | 40.0 | 40.07753 | -0.07753 |
| 7.0  | D24 | 18.8 | 11.95003 | 6.84997  |
| 7.0  | D24 | 14.4 | 11.95003 | 2.44997  |
| 10.0 | D24 | 3.3  | 4.82192  | -1.52192 |
| 10.0 | D24 | 5.7  | 4.82192  | 0.87808  |
| 17.0 | D24 | 2.6  | 0.58015  | 2.01985  |
| 26.0 | D24 | 2.4  | 0.03811  | 2.36189  |
| 0.1  | DCP | 0.5  | 0.53669  | -0.03669 |
| 0.1  | DCP | 0.5  | 0.53669  | -0.03669 |
| 0.3  | DCP | 1.8  | 1.49330  | 0.30670  |
| 0.3  | DCP | 2.3  | 1.49330  | 0.80670  |
| 1.0  | DCP | 4.4  | 3.82673  | 0.57327  |
| 1.0  | DCP | 3.6  | 3.82673  | -0.22673 |
| 3.0  | DCP | 4.8  | 5.44284  | -0.64284 |
| 3.0  | DCP | 4.3  | 5.44284  | -1.14284 |
| 7.0  | DCP | 3.3  | 2.91739  | 0.38261  |
| 7.0  | DCP | 3.7  | 2.91739  | 0.78261  |
| 10.0 | DCP | 1.7  | 1.40855  | 0.29145  |
| 10.0 | DCP | 2.3  | 1.40855  | 0.89145  |
| 17.0 | DCP | 0.5  | 0.20151  | 0.29849  |
| 0.3  | DCA | 0.5  | 0.10234  | 0.39766  |
| 0.3  | DCA | 0.5  | 0.10234  | 0.39766  |
| 1.0  | DCA | 3.9  | 0.90045  | 2.99955  |
| 1.0  | DCA | 2.9  | 0.90045  | 1.99955  |
| 3.0  | DCA | 6.3  | 4.17995  | 2.12005  |
| 3.0  | DCA | 5.4  | 4.17995  | 1.22005  |
| 7.0  | DCA | 5.7  | 6.17795  | -0.47795 |
| 7.0  | DCA | 5.5  | 6.17795  | -0.67795 |
| 10.0 | DCA | 4.5  | 4.82056  | -0.32056 |
| 10.0 | DCA | 4.2  | 4.82056  | -0.62056 |
| 17.0 | DCA | 3.0  | 1.55162  | 1.44838  |
| 26.0 | DCA | 1.5  | 0.23461  | 1.26539  |

**Listing 25:** SFO-SFO(ns)-SFO fit to Site E1 data, variance by variable

```

mkin version used for fitting: 1.0.4.9000
R version used for fitting: 4.1.0
Date of fit: Mon Jul 26 12:18:32 2021
Date of summary: Mon Jul 26 18:52:53 2021

Equations:
d_D24/dt = - k_D24 * D24
d_DCP/dt = + f_D24_to_DCP * k_D24 * D24 - k_DCP * DCP
d_DCA/dt = + k_DCP * DCP - k_DCA * DCA

Model predictions using solution type deSolve

Fitted using 1480 model solutions performed in 1.551 s

Error model: Variance unique to each observed variable

Error model algorithm: d_3
Direct fitting and three-step fitting yield approximately the same likelihood

Starting values for parameters to be optimised:
      value  type
D24_0      100.5500 state
k_D24        0.1000 deparm
k_DCP        0.1001 deparm
k_DCA        0.1002 deparm
f_D24_to_DCP 0.5000 deparm
sigma_D24     3.0000 error
sigma_DCP     3.0000 error
sigma_DCA     3.0000 error

Starting values for the transformed parameters actually optimised:
      value lower upper
D24_0      100.550000 -Inf  Inf
log_k_D24   -2.302585 -Inf  Inf
log_k_DCP   -2.301586 -Inf  Inf
log_k_DCA   -2.300587 -Inf  Inf
f_D24_qlogis 0.000000 -Inf  Inf
sigma_D24     3.000000  0  Inf
sigma_DCP     3.000000  0  Inf
sigma_DCA     3.000000  0  Inf

Fixed parameter values:
      value type
DCP_0      0 state
DCA_0      0 state

Warning(s):
Observations with value of zero were removed from the data

Results:
      AIC      BIC    logLik
163.9025 177.6111 -73.95127

Optimised, transformed parameters with symmetric confidence intervals:
      Estimate Std. Error Lower Upper
D24_0      99.3200      1.3770 96.5200 102.1000
log_k_D24   -1.1960      0.0530 -1.3030 -1.0880
log_k_DCP   -0.7960      0.2101 -1.2230 -0.3685
log_k_DCA   -1.3860      0.2540 -1.9030 -0.8692
f_D24_qlogis -1.4800      0.1927 -1.8720 -1.0880
sigma_D24     3.1510      0.5641  2.0030  4.2990
sigma_DCP     0.5932      0.1369  0.3147  0.8716
sigma_DCA     1.4190      0.3490  0.7091  2.1290

```

## Parameter correlation:

|              | D24_0     | log_k_D24 | log_k_DCP | log_k_DCA | f_D24_qlogis | sigma_D24 |
|--------------|-----------|-----------|-----------|-----------|--------------|-----------|
| D24_0        | 1.000000  | 0.501734  | -0.18137  | -0.1743   | -0.32038     | -0.079579 |
| log_k_D24    | 0.501734  | 1.000000  | -0.36149  | -0.3474   | -0.50686     | -0.158607 |
| log_k_DCP    | -0.181373 | -0.361492 | 1.000000  | 0.7482    | 0.91351      | 0.057335  |
| log_k_DCA    | -0.174313 | -0.347422 | 0.74821   | 1.0000    | 0.79688      | 0.055104  |
| f_D24_qlogis | -0.320380 | -0.506862 | 0.91351   | 0.7969    | 1.00000      | 0.080392  |
| sigma_D24    | -0.079579 | -0.158607 | 0.05734   | 0.0551    | 0.08039      | 1.000000  |
| sigma_DCP    | -0.001227 | -0.002446 | 0.48542   | 0.3718    | 0.43854      | 0.000388  |
| sigma_DCA    | 0.078495  | 0.156447  | -0.54901  | -0.4313   | -0.52374     | -0.024814 |
|              | sigma_DCP | sigma_DCA |           |           |              |           |
| D24_0        | -0.001227 | 0.07849   |           |           |              |           |
| log_k_D24    | -0.002446 | 0.15645   |           |           |              |           |
| log_k_DCP    | 0.485421  | -0.54901  |           |           |              |           |
| log_k_DCA    | 0.371777  | -0.43134  |           |           |              |           |
| f_D24_qlogis | 0.438543  | -0.52374  |           |           |              |           |
| sigma_D24    | 0.000388  | -0.02481  |           |           |              |           |
| sigma_DCP    | 1.000000  | -0.28238  |           |           |              |           |
| sigma_DCA    | -0.282381 | 1.000000  |           |           |              |           |

## Backtransformed parameters:

Confidence intervals for internally transformed parameters are asymmetric.  
t-test (unrealistically) based on the assumption of normal distribution  
for estimators of untransformed parameters.

|              | Estimate | t value | Pr(>t)    | Lower   | Upper    |
|--------------|----------|---------|-----------|---------|----------|
| D24_0        | 99.3200  | 72.160  | 3.365e-38 | 96.5200 | 102.1000 |
| k_D24        | 0.3025   | 18.870  | 1.508e-19 | 0.2716  | 0.3370   |
| k_DCP        | 0.4512   | 4.760   | 1.867e-05 | 0.2942  | 0.6917   |
| k_DCA        | 0.2501   | 3.938   | 2.008e-04 | 0.1492  | 0.4193   |
| f_D24_to_DCP | 0.1855   | 6.371   | 1.625e-07 | 0.1333  | 0.2521   |
| sigma_D24    | 3.1510   | 5.585   | 1.639e-06 | 2.0030  | 4.2990   |
| sigma_DCP    | 0.5932   | 4.334   | 6.455e-05 | 0.3147  | 0.8716   |
| sigma_DCA    | 1.4190   | 4.066   | 1.394e-04 | 0.7091  | 2.1290   |

## FOCUS Chi2 error levels in percent:

|          | err.min | n.optim | df |
|----------|---------|---------|----|
| All data | 8.649   | 5       | 18 |
| D24      | 4.835   | 2       | 7  |
| DCP      | 17.034  | 2       | 5  |
| DCA      | 29.895  | 1       | 6  |

## Resulting formation fractions:

ff  
D24\_DCP 0.1855  
D24\_sink 0.8145

## Estimated disappearance times:

DT50 DT90  
D24 2.291 7.611  
DCP 1.536 5.104  
DCA 2.772 9.207

## Data:

| time | variable | observed | predicted | residual |
|------|----------|----------|-----------|----------|
| 0.0  | D24      | 100.2    | 99.32303  | 0.87697  |
| 0.0  | D24      | 100.9    | 99.32303  | 1.57697  |
| 0.1  | D24      | 97.9     | 96.36330  | 1.53670  |
| 0.1  | D24      | 98.3     | 96.36330  | 1.93670  |
| 0.3  | D24      | 92.4     | 90.70580  | 1.69420  |
| 0.3  | D24      | 91.9     | 90.70580  | 1.19420  |
| 1.0  | D24      | 65.8     | 73.39508  | -7.59508 |
| 1.0  | D24      | 69.5     | 73.39508  | -3.89508 |
| 3.0  | D24      | 37.5     | 40.07753  | -2.57753 |
| 3.0  | D24      | 40.0     | 40.07753  | -0.07753 |
| 7.0  | D24      | 18.8     | 11.95003  | 6.84997  |
| 7.0  | D24      | 14.4     | 11.95003  | 2.44997  |
| 10.0 | D24      | 3.3      | 4.82192   | -1.52192 |
| 10.0 | D24      | 5.7      | 4.82192   | 0.87808  |



|      |     |     |         |          |
|------|-----|-----|---------|----------|
| 17.0 | D24 | 2.6 | 0.58015 | 2.01985  |
| 26.0 | D24 | 2.4 | 0.03811 | 2.36189  |
| 0.1  | DCP | 0.5 | 0.53669 | -0.03669 |
| 0.1  | DCP | 0.5 | 0.53669 | -0.03669 |
| 0.3  | DCP | 1.8 | 1.49330 | 0.30670  |
| 0.3  | DCP | 2.3 | 1.49330 | 0.80670  |
| 1.0  | DCP | 4.4 | 3.82673 | 0.57327  |
| 1.0  | DCP | 3.6 | 3.82673 | -0.22673 |
| 3.0  | DCP | 4.8 | 5.44284 | -0.64284 |
| 3.0  | DCP | 4.3 | 5.44284 | -1.14284 |
| 7.0  | DCP | 3.3 | 2.91739 | 0.38261  |
| 7.0  | DCP | 3.7 | 2.91739 | 0.78261  |
| 10.0 | DCP | 1.7 | 1.40855 | 0.29145  |
| 10.0 | DCP | 2.3 | 1.40855 | 0.89145  |
| 17.0 | DCP | 0.5 | 0.20151 | 0.29849  |
| 0.3  | DCA | 0.5 | 0.10234 | 0.39766  |
| 0.3  | DCA | 0.5 | 0.10234 | 0.39766  |
| 1.0  | DCA | 3.9 | 0.90045 | 2.99955  |
| 1.0  | DCA | 2.9 | 0.90045 | 1.99955  |
| 3.0  | DCA | 6.3 | 4.17995 | 2.12005  |
| 3.0  | DCA | 5.4 | 4.17995 | 1.22005  |
| 7.0  | DCA | 5.7 | 6.17795 | -0.47795 |
| 7.0  | DCA | 5.5 | 6.17795 | -0.67795 |
| 10.0 | DCA | 4.5 | 4.82056 | -0.32056 |
| 10.0 | DCA | 4.2 | 4.82056 | -0.62056 |
| 17.0 | DCA | 3.0 | 1.55162 | 1.44838  |
| 26.0 | DCA | 1.5 | 0.23461 | 1.26539  |

**Listing 26:** SFO-SFO-SFO fit to Site E1 data, two-component error

```

mkin version used for fitting: 1.0.4.9000
R version used for fitting: 4.1.0
Date of fit: Mon Jul 26 12:18:42 2021
Date of summary: Mon Jul 26 18:52:53 2021

Equations:
d_D24/dt = - k_D24 * D24
d_DCP/dt = + f_D24_to_DCP * k_D24 * D24 - k_DCP * DCP
d_DCA/dt = + f_DCP_to_DCA * k_DCP * DCP - k_DCA * DCA

Model predictions using solution type deSolve

Fitted using 2392 model solutions performed in 2.161 s

Error model: Two-component variance function

Error model algorithm: d_3
Direct fitting and three-step fitting yield approximately the same likelihood

Starting values for parameters to be optimised:
      value type
D24_0    100.5500 state
k_D24      0.1000 deparm
k_DCP      0.1001 deparm
k_DCA      0.1002 deparm
f_D24_to_DCP 0.5000 deparm
f_DCP_to_DCA 0.5000 deparm
sigma_low  0.1000 error
rsd_high   0.1000 error

Starting values for the transformed parameters actually optimised:
      value lower upper
D24_0    100.550000 -Inf  Inf
log_k_D24 -2.302585 -Inf  Inf
log_k_DCP -2.301586 -Inf  Inf
log_k_DCA -2.300587 -Inf  Inf
f_D24_qlogis 0.000000 -Inf  Inf
f_DCP_qlogis 0.000000 -Inf  Inf
sigma_low  0.100000  0    Inf
rsd_high   0.100000  0    Inf

Fixed parameter values:
      value type
DCP_0      0 state
DCA_0      0 state

Warning(s):
Observations with value of zero were removed from the data

Results:
      AIC      BIC    logLik
181.7071 195.4157 -82.85355

Optimised, transformed parameters with symmetric confidence intervals:
      Estimate Std. Error Lower Upper
D24_0    96.64000 2.456e+00 9.165e+01 1.016e+02
log_k_D24 -1.29700 3.538e-02 -1.369e+00 -1.225e+00
log_k_DCP -0.40970 2.000e-01 -8.166e-01 -2.835e-03
log_k_DCA -1.03700 2.000e-01 -1.444e+00 -6.300e-01
f_D24_qlogis -1.06100 1.983e-01 -1.464e+00 -6.573e-01
f_DCP_qlogis 20.11000 2.143e+04 -4.359e+04 4.363e+04
sigma_low  1.24500 1.937e-01 8.511e-01 1.639e+00
rsd_high   0.06861 2.143e-02 2.501e-02 1.122e-01

```

## Parameter correlation:

|              | D24_0        | log_k_D24  | log_k_DCP  | log_k_DCA  | f_D24_qlogis |
|--------------|--------------|------------|------------|------------|--------------|
| D24_0        | 1.000e+00    | 5.430e-01  | -0.0639131 | -0.0899955 | -0.3032491   |
| log_k_D24    | 5.430e-01    | 1.000e+00  | -0.1184753 | -0.1661780 | -0.3349740   |
| log_k_DCP    | -6.391e-02   | -1.185e-01 | 1.0000000  | 0.4782423  | 0.5810435    |
| log_k_DCA    | -9.000e-02   | -1.662e-01 | 0.4782423  | 1.0000000  | 0.7900033    |
| f_D24_qlogis | -3.032e-01   | -3.350e-01 | 0.5810435  | 0.7900033  | 1.0000000    |
| f_DCP_qlogis | 3.919e-07    | 5.131e-07  | -0.0001217 | 0.0001376  | -0.0001065   |
| sigma_low    | 1.144e-01    | 2.403e-01  | -0.0142438 | -0.0319439 | -0.0832671   |
| rsd_high     | -2.041e-01   | -3.176e-01 | 0.0188444  | 0.0422396  | 0.1100059    |
|              | f_DCP_qlogis | sigma_low  | rsd_high   |            |              |
| D24_0        | 3.919e-07    | 1.144e-01  | -2.041e-01 |            |              |
| log_k_D24    | 5.131e-07    | 2.403e-01  | -3.176e-01 |            |              |
| log_k_DCP    | -1.217e-04   | -1.424e-02 | 1.884e-02  |            |              |
| log_k_DCA    | 1.376e-04    | -3.194e-02 | 4.224e-02  |            |              |
| f_D24_qlogis | -1.065e-04   | -8.327e-02 | 1.100e-01  |            |              |
| f_DCP_qlogis | 1.000e+00    | -1.369e-05 | 4.815e-06  |            |              |
| sigma_low    | -1.369e-05   | 1.000e+00  | -4.061e-01 |            |              |
| rsd_high     | 4.815e-06    | -4.061e-01 | 1.000e+00  |            |              |

## Backtransformed parameters:

Confidence intervals for internally transformed parameters are asymmetric.  
t-test (unrealistically) based on the assumption of normal distribution  
for estimators of untransformed parameters.

|              | Estimate | t value | Pr(>t)    | Lower    | Upper     |
|--------------|----------|---------|-----------|----------|-----------|
| D24_0        | 96.64000 | 39.340  | 1.307e-29 | 91.65000 | 101.60000 |
| k_D24        | 0.27340  | 28.260  | 5.270e-25 | 0.25440  | 0.2938    |
| k_DCP        | 0.66380  | 1.912   | 3.233e-02 | 0.44190  | 0.9972    |
| k_DCA        | 0.35460  | 1.724   | 4.701e-02 | 0.23610  | 0.5326    |
| f_D24_to_DCP | 0.25720  | 2.903   | 3.269e-03 | 0.18780  | 0.3414    |
| f_DCP_to_DCA | 1.00000  | 1.275   | 1.057e-01 | 0.00000  | 1.00000   |
| sigma_low    | 1.24500  | 6.206   | 2.635e-07 | 0.85110  | 1.6390    |
| rsd_high     | 0.06861  | 3.188   | 1.566e-03 | 0.02501  | 0.1122    |

## FOCUS Chi2 error levels in percent:

|          | err.min | n.optim | df |
|----------|---------|---------|----|
| All data | 10.359  | 6       | 17 |
| D24      | 5.872   | 2       | 7  |
| DCP      | 20.733  | 2       | 5  |
| DCA      | 28.408  | 2       | 5  |

## Resulting formation fractions:

|          | ff        |
|----------|-----------|
| D24_DCP  | 2.572e-01 |
| D24_sink | 7.428e-01 |
| DCP_DCA  | 1.000e+00 |
| DCP_sink | 1.851e-09 |

## Estimated disappearance times:

|     | DT50  | DT90  |
|-----|-------|-------|
| D24 | 2.535 | 8.421 |
| DCP | 1.044 | 3.469 |
| DCA | 1.955 | 6.494 |

## Data:

| time | variable | observed | predicted | residual |
|------|----------|----------|-----------|----------|
| 0.0  | D24      | 100.2    | 96.64414  | 3.55586  |
| 0.0  | D24      | 100.9    | 96.64414  | 4.25586  |
| 0.1  | D24      | 97.9     | 94.03739  | 3.86261  |
| 0.1  | D24      | 98.3     | 94.03739  | 4.26261  |
| 0.3  | D24      | 92.4     | 89.03292  | 3.36708  |
| 0.3  | D24      | 91.9     | 89.03292  | 2.86708  |
| 1.0  | D24      | 65.8     | 73.52343  | -7.72343 |
| 1.0  | D24      | 69.5     | 73.52343  | -4.02343 |
| 3.0  | D24      | 37.5     | 42.55262  | -5.05262 |
| 3.0  | D24      | 40.0     | 42.55262  | -2.55262 |
| 7.0  | D24      | 18.8     | 14.25369  | 4.54631  |
| 7.0  | D24      | 14.4     | 14.25369  | 0.14631  |

|      |     |     |         |          |
|------|-----|-----|---------|----------|
| 10.0 | D24 | 3.3 | 6.27593 | -2.97593 |
| 10.0 | D24 | 5.7 | 6.27593 | -0.57593 |
| 17.0 | D24 | 2.6 | 0.92561 | 1.67439  |
| 26.0 | D24 | 2.4 | 0.07901 | 2.32099  |
| 0.1  | DCP | 0.5 | 0.64849 | -0.14849 |
| 0.1  | DCP | 0.5 | 0.64849 | -0.14849 |
| 0.3  | DCP | 1.8 | 1.77231 | 0.02769  |
| 0.3  | DCP | 2.3 | 1.77231 | 0.52769  |
| 1.0  | DCP | 4.4 | 4.28014 | 0.11986  |
| 1.0  | DCP | 3.6 | 4.28014 | -0.68014 |
| 3.0  | DCP | 4.8 | 5.28840 | -0.48840 |
| 3.0  | DCP | 4.3 | 5.28840 | -0.98840 |
| 7.0  | DCP | 3.3 | 2.40033 | 0.89967  |
| 7.0  | DCP | 3.7 | 2.40033 | 1.29967  |
| 10.0 | DCP | 1.7 | 1.10760 | 0.59240  |
| 10.0 | DCP | 2.3 | 1.10760 | 1.19240  |
| 17.0 | DCP | 0.5 | 0.16650 | 0.33350  |
| 0.3  | DCA | 0.5 | 0.17845 | 0.32155  |
| 0.3  | DCA | 0.5 | 0.17845 | 0.32155  |
| 1.0  | DCA | 3.9 | 1.47147 | 2.42853  |
| 1.0  | DCA | 2.9 | 1.47147 | 1.42853  |
| 3.0  | DCA | 6.3 | 5.75039 | 0.54961  |
| 3.0  | DCA | 5.4 | 5.75039 | -0.35039 |
| 7.0  | DCA | 5.7 | 6.33707 | -0.63707 |
| 7.0  | DCA | 5.5 | 6.33707 | -0.83707 |
| 10.0 | DCA | 4.5 | 4.11064 | 0.38936  |
| 10.0 | DCA | 4.2 | 4.11064 | 0.08936  |
| 17.0 | DCA | 3.0 | 0.93095 | 2.06905  |
| 26.0 | DCA | 1.5 | 0.09860 | 1.40140  |

**Listing 27:** SFO-SFO(ns)-SFO fit to Site E1 data, two-component error

```

mkin version used for fitting: 1.0.4.9000
R version used for fitting: 4.1.0
Date of fit: Mon Jul 26 12:18:40 2021
Date of summary: Mon Jul 26 18:52:53 2021

Equations:
d_D24/dt = - k_D24 * D24
d_DCP/dt = + f_D24_to_DCP * k_D24 * D24 - k_DCP * DCP
d_DCA/dt = + k_DCP * DCP - k_DCA * DCA

Model predictions using solution type deSolve

Fitted using 1436 model solutions performed in 1.477 s

Error model: Two-component variance function

Error model algorithm: d_3
Direct fitting and three-step fitting yield approximately the same likelihood

Starting values for parameters to be optimised:
      value  type
D24_0    100.5500 state
k_D24      0.1000 deparm
k_DCP      0.1001 deparm
k_DCA      0.1002 deparm
f_D24_to_DCP 0.5000 deparm
sigma_low  0.1000 error
rsd_high   0.1000 error

Starting values for the transformed parameters actually optimised:
      value lower upper
D24_0    100.550000 -Inf  Inf
log_k_D24 -2.302585 -Inf  Inf
log_k_DCP -2.301586 -Inf  Inf
log_k_DCA -2.300587 -Inf  Inf
f_D24_qlogis 0.000000 -Inf  Inf
sigma_low  0.100000  0    Inf
rsd_high   0.100000  0    Inf

Fixed parameter values:
      value  type
DCP_0      0 state
DCA_0      0 state

Warning(s):
Observations with value of zero were removed from the data

Results:
      AIC      BIC    logLik
179.7071 191.7021 -82.85355

Optimised, transformed parameters with symmetric confidence intervals:
      Estimate Std. Error  Lower  Upper
D24_0    96.64000    2.45600  91.65000 101.600000
log_k_D24 -1.29700    0.03538  -1.36900 -1.225000
log_k_DCP -0.40970    0.20000  -0.81620 -0.003289
log_k_DCA -1.03700    0.20000  -1.44300 -0.630400
f_D24_qlogis -1.06100    0.19830  -1.46400 -0.657700
sigma_low  1.24500    0.19370  0.85150  1.639000
rsd_high  0.06861    0.02143  0.02506  0.112200

Parameter correlation:
      D24_0 log_k_D24 log_k_DCP log_k_DCA f_D24_qlogis sigma_low

```

|              |          |         |          |          |          |          |
|--------------|----------|---------|----------|----------|----------|----------|
| D24_0        | 1.00000  | 0.5430  | -0.06391 | -0.09000 | -0.30325 | 0.11437  |
| log_k_D24    | 0.54296  | 1.0000  | -0.11848 | -0.16618 | -0.33497 | 0.24031  |
| log_k_DCP    | -0.06391 | -0.1185 | 1.00000  | 0.47824  | 0.58104  | -0.01424 |
| log_k_DCA    | -0.09000 | -0.1662 | 0.47824  | 1.00000  | 0.79000  | -0.03194 |
| f_D24_qlogis | -0.30325 | -0.3350 | 0.58104  | 0.79000  | 1.00000  | -0.08327 |
| sigma_low    | 0.11437  | 0.2403  | -0.01424 | -0.03194 | -0.08327 | 1.00000  |
| rsd_high     | -0.20412 | -0.3176 | 0.01884  | 0.04224  | 0.11001  | -0.40613 |

|          |  |
|----------|--|
| rsd_high |  |
|----------|--|

|       |          |
|-------|----------|
| D24_0 | -0.20412 |
|-------|----------|

|           |          |
|-----------|----------|
| log_k_D24 | -0.31761 |
|-----------|----------|

|           |         |
|-----------|---------|
| log_k_DCP | 0.01884 |
|-----------|---------|

|           |         |
|-----------|---------|
| log_k_DCA | 0.04224 |
|-----------|---------|

|              |         |
|--------------|---------|
| f_D24_qlogis | 0.11001 |
|--------------|---------|

|           |          |
|-----------|----------|
| sigma_low | -0.40613 |
|-----------|----------|

|          |         |
|----------|---------|
| rsd_high | 1.00000 |
|----------|---------|

Backtransformed parameters:

Confidence intervals for internally transformed parameters are asymmetric.

t-test (unrealistically) based on the assumption of normal distribution

for estimators of untransformed parameters.

|              | Estimate | t value | Pr(>t)    | Lower    | Upper     |
|--------------|----------|---------|-----------|----------|-----------|
| D24_0        | 96.64000 | 39.350  | 3.052e-30 | 91.65000 | 101.60000 |
| k_D24        | 0.27340  | 28.270  | 1.680e-25 | 0.25450  | 0.2938    |
| k_DCP        | 0.66380  | 5.000   | 8.589e-06 | 0.44210  | 0.9967    |
| k_DCA        | 0.35460  | 5.000   | 8.577e-06 | 0.23620  | 0.5324    |
| f_D24_to_DCP | 0.25720  | 6.787   | 4.169e-08 | 0.18790  | 0.3413    |
| sigma_low    | 1.24500  | 6.429   | 1.202e-07 | 0.85150  | 1.6390    |
| rsd_high     | 0.06861  | 3.202   | 1.480e-03 | 0.02506  | 0.1122    |

FOCUS Chi2 error levels in percent:

|          | err.min | n.optim | df |
|----------|---------|---------|----|
| All data | 10.127  | 5       | 18 |
| D24      | 5.872   | 2       | 7  |
| DCP      | 20.733  | 2       | 5  |
| DCA      | 26.637  | 1       | 6  |

Resulting formation fractions:

| ff              |
|-----------------|
| D24_DCP 0.2572  |
| D24_sink 0.7428 |

Estimated disappearance times:

| DT50      | DT90  |
|-----------|-------|
| D24 2.535 | 8.421 |
| DCP 1.044 | 3.469 |
| DCA 1.955 | 6.494 |

Data:

| time | variable | observed | predicted | residual |
|------|----------|----------|-----------|----------|
| 0.0  | D24      | 100.2    | 96.64414  | 3.55586  |
| 0.0  | D24      | 100.9    | 96.64414  | 4.25586  |
| 0.1  | D24      | 97.9     | 94.03739  | 3.86261  |
| 0.1  | D24      | 98.3     | 94.03739  | 4.26261  |
| 0.3  | D24      | 92.4     | 89.03292  | 3.36708  |
| 0.3  | D24      | 91.9     | 89.03292  | 2.86708  |
| 1.0  | D24      | 65.8     | 73.52343  | -7.72343 |
| 1.0  | D24      | 69.5     | 73.52343  | -4.02343 |
| 3.0  | D24      | 37.5     | 42.55262  | -5.05262 |
| 3.0  | D24      | 40.0     | 42.55262  | -2.55262 |
| 7.0  | D24      | 18.8     | 14.25369  | 4.54631  |
| 7.0  | D24      | 14.4     | 14.25369  | 0.14631  |
| 10.0 | D24      | 3.3      | 6.27593   | -2.97593 |
| 10.0 | D24      | 5.7      | 6.27593   | -0.57593 |
| 17.0 | D24      | 2.6      | 0.92561   | 1.67439  |
| 26.0 | D24      | 2.4      | 0.07901   | 2.32099  |
| 0.1  | DCP      | 0.5      | 0.64849   | -0.14849 |
| 0.1  | DCP      | 0.5      | 0.64849   | -0.14849 |
| 0.3  | DCP      | 1.8      | 1.77231   | 0.02769  |
| 0.3  | DCP      | 2.3      | 1.77231   | 0.52769  |

|      |     |     |         |          |
|------|-----|-----|---------|----------|
| 1.0  | DCP | 4.4 | 4.28014 | 0.11986  |
| 1.0  | DCP | 3.6 | 4.28014 | -0.68014 |
| 3.0  | DCP | 4.8 | 5.28840 | -0.48840 |
| 3.0  | DCP | 4.3 | 5.28840 | -0.98840 |
| 7.0  | DCP | 3.3 | 2.40033 | 0.89967  |
| 7.0  | DCP | 3.7 | 2.40033 | 1.29967  |
| 10.0 | DCP | 1.7 | 1.10760 | 0.59240  |
| 10.0 | DCP | 2.3 | 1.10760 | 1.19240  |
| 17.0 | DCP | 0.5 | 0.16650 | 0.33350  |
| 0.3  | DCA | 0.5 | 0.17845 | 0.32155  |
| 0.3  | DCA | 0.5 | 0.17845 | 0.32155  |
| 1.0  | DCA | 3.9 | 1.47147 | 2.42853  |
| 1.0  | DCA | 2.9 | 1.47147 | 1.42853  |
| 3.0  | DCA | 6.3 | 5.75039 | 0.54961  |
| 3.0  | DCA | 5.4 | 5.75039 | -0.35039 |
| 7.0  | DCA | 5.7 | 6.33707 | -0.63707 |
| 7.0  | DCA | 5.5 | 6.33707 | -0.83707 |
| 10.0 | DCA | 4.5 | 4.11064 | 0.38936  |
| 10.0 | DCA | 4.2 | 4.11064 | 0.08936  |
| 17.0 | DCA | 3.0 | 0.93095 | 2.06905  |
| 26.0 | DCA | 1.5 | 0.09860 | 1.40140  |

**Listing 28:** SFO-SFO-SFO fit to Site I2 data, variance by variable

```

mkin version used for fitting: 1.0.4.9000
R version used for fitting: 4.1.0
Date of fit: Mon Jul 26 12:18:34 2021
Date of summary: Mon Jul 26 18:52:53 2021

Equations:
d_D24/dt = - k_D24 * D24
d_DCP/dt = + f_D24_to_DCP * k_D24 * D24 - k_DCP * DCP
d_DCA/dt = + f_DCP_to_DCA * k_DCP * DCP - k_DCA * DCA

Model predictions using solution type deSolve

Fitted using 3877 model solutions performed in 3.64 s

Error model: Variance unique to each observed variable

Error model algorithm: d_3
Direct fitting and three-step fitting yield approximately the same likelihood

Starting values for parameters to be optimised:
      value  type
D24_0      98.9000 state
k_D24       0.1000 deparm
k_DCP       0.1001 deparm
k_DCA       0.1002 deparm
f_D24_to_DCP 0.5000 deparm
f_DCP_to_DCA 0.5000 deparm
sigma_D24    3.0000 error
sigma_DCP    3.0000 error
sigma_DCA    3.0000 error

Starting values for the transformed parameters actually optimised:
      value lower upper
D24_0      98.9000000 -Inf  Inf
log_k_D24  -2.302585 -Inf  Inf
log_k_DCP  -2.301586 -Inf  Inf
log_k_DCA  -2.300587 -Inf  Inf
f_D24_qlogis 0.000000 -Inf  Inf
f_DCP_qlogis 0.000000 -Inf  Inf
sigma_D24    3.000000  0  Inf
sigma_DCP    3.000000  0  Inf
sigma_DCA    3.000000  0  Inf

Fixed parameter values:
      value  type
DCP_0      0 state
DCA_0      0 state

Warning(s):
Observations with value of zero were removed from the data

Results:
      AIC      BIC    logLik
167.6242 183.2633 -74.81212

Optimised, transformed parameters with symmetric confidence intervals:
      Estimate Std. Error Lower Upper
D24_0      98.08000    1.86400  94.2800 101.9000
log_k_D24  -0.97790    0.06712 -1.1140 -0.8413
log_k_DCP   0.04046    0.23270 -0.4329  0.5138
log_k_DCA  -2.37100    0.16550 -2.7080 -2.0340
f_D24_qlogis -1.40800    0.24720 -1.9110 -0.9047
f_DCP_qlogis -0.02683    0.47490 -0.9930  0.9394

```



|           |         |         |        |        |
|-----------|---------|---------|--------|--------|
| sigma_D24 | 4.28900 | 0.73600 | 2.7920 | 5.7860 |
| sigma_DCP | 0.73270 | 0.13860 | 0.4507 | 1.0150 |
| sigma_DCA | 0.62430 | 0.13360 | 0.3524 | 0.8962 |

Parameter correlation:

|              | D24_0    | log_k_D24 | log_k_DCP | log_k_DCA | f_D24_qlogis | f_DCP_qlogis |
|--------------|----------|-----------|-----------|-----------|--------------|--------------|
| D24_0        | 1.000000 | 0.43764   | -0.119391 | -0.078526 | -0.27234     | 0.105021     |
| log_k_D24    | 0.43764  | 1.000000  | -0.272804 | -0.179428 | -0.44550     | 0.239968     |
| log_k_DCP    | -0.11939 | -0.27280  | 1.000000  | -0.386811 | 0.80952      | -0.829834    |
| log_k_DCA    | -0.07853 | -0.17943  | -0.386811 | 1.000000  | -0.24397     | 0.556540     |
| f_D24_qlogis | -0.27234 | -0.44550  | 0.809521  | -0.243968 | 1.000000     | -0.908460    |
| f_DCP_qlogis | 0.10502  | 0.23997   | -0.829834 | 0.556540  | -0.90846     | 1.000000     |
| sigma_D24    | 0.01492  | 0.03408   | -0.009298 | -0.006116 | -0.01518     | 0.008179     |
| sigma_DCP    | 0.01786  | 0.04080   | -0.023022 | -0.001723 | -0.02702     | 0.019611     |
| sigma_DCA    | -0.03856 | -0.08812  | 0.037412  | 0.009514  | 0.04920      | -0.032190    |

  

|              | sigma_D24 | sigma_DCP | sigma_DCA |
|--------------|-----------|-----------|-----------|
| D24_0        | 0.014919  | 0.017857  | -0.038565 |
| log_k_D24    | 0.034084  | 0.040803  | -0.088119 |
| log_k_DCP    | -0.009298 | -0.023022 | 0.037412  |
| log_k_DCA    | -0.006116 | -0.001723 | 0.009514  |
| f_D24_qlogis | -0.015185 | -0.027016 | 0.049197  |
| f_DCP_qlogis | 0.008179  | 0.019611  | -0.032190 |
| sigma_D24    | 1.000000  | 0.001391  | -0.003003 |
| sigma_DCP    | 0.001391  | 1.000000  | -0.003767 |
| sigma_DCA    | -0.003003 | -0.003767 | 1.000000  |

Backtransformed parameters:

Confidence intervals for internally transformed parameters are asymmetric.  
t-test (unrealistically) based on the assumption of normal distribution  
for estimators of untransformed parameters.

|              | Estimate | t value | Pr(>t)    | Lower    | Upper    |
|--------------|----------|---------|-----------|----------|----------|
| D24_0        | 98.0800  | 52.610  | 1.039e-33 | 94.28000 | 101.9000 |
| k_D24        | 0.3761   | 14.900  | 1.644e-16 | 0.32810  | 0.4311   |
| k_DCP        | 1.0410   | 4.298   | 7.164e-05 | 0.64860  | 1.6720   |
| k_DCA        | 0.0934   | 6.041   | 4.275e-07 | 0.06669  | 0.1308   |
| f_D24_to_DCP | 0.1966   | 5.034   | 8.339e-06 | 0.12890  | 0.2881   |
| f_DCP_to_DCA | 0.4933   | 4.156   | 1.080e-04 | 0.27030  | 0.7190   |
| sigma_D24    | 4.2890   | 5.828   | 8.015e-07 | 2.79200  | 5.7860   |
| sigma_DCP    | 0.7327   | 5.287   | 3.959e-06 | 0.45070  | 1.0150   |
| sigma_DCA    | 0.6243   | 4.672   | 2.419e-05 | 0.35240  | 0.8962   |

FOCUS Chi2 error levels in percent:

|          | err.min | n.optim | df |
|----------|---------|---------|----|
| All data | 12.804  | 6       | 17 |
| D24      | 7.504   | 2       | 7  |
| DCP      | 26.259  | 2       | 6  |
| DCA      | 12.900  | 2       | 4  |

Resulting formation fractions:

|          | ff     |
|----------|--------|
| D24_DCP  | 0.1966 |
| D24_sink | 0.8034 |
| DCP_DCA  | 0.4933 |
| DCP_sink | 0.5067 |

Estimated disappearance times:

|     | DT50   | DT90   |
|-----|--------|--------|
| D24 | 1.8430 | 6.122  |
| DCP | 0.6657 | 2.211  |
| DCA | 7.4212 | 24.653 |

Data:

| time | variable | observed | predicted | residual |
|------|----------|----------|-----------|----------|
| 0.0  | D24      | 99.0     | 9.808e+01 | 0.92325  |
| 0.0  | D24      | 98.8     | 9.808e+01 | 0.72325  |
| 0.1  | D24      | 90.1     | 9.446e+01 | -4.35655 |
| 0.1  | D24      | 89.2     | 9.446e+01 | -5.25655 |
| 0.3  | D24      | 86.3     | 8.761e+01 | -1.31211 |
| 0.3  | D24      | 86.5     | 8.761e+01 | -1.11211 |

|      |     |      |           |          |
|------|-----|------|-----------|----------|
| 1.0  | D24 | 76.7 | 6.733e+01 | 9.36725  |
| 1.0  | D24 | 74.7 | 6.733e+01 | 7.36725  |
| 3.0  | D24 | 33.1 | 3.174e+01 | 1.36438  |
| 5.0  | D24 | 8.8  | 1.496e+01 | -6.15780 |
| 5.0  | D24 | 6.7  | 1.496e+01 | -8.25780 |
| 10.0 | D24 | 3.1  | 2.281e+00 | 0.81877  |
| 10.0 | D24 | 3.2  | 2.281e+00 | 0.91877  |
| 17.0 | D24 | 1.6  | 1.640e-01 | 1.43602  |
| 17.0 | D24 | 1.7  | 1.640e-01 | 1.53602  |
| 26.0 | D24 | 1.5  | 5.556e-03 | 1.49444  |
| 26.0 | D24 | 1.9  | 5.556e-03 | 1.89444  |
| 0.1  | DCP | 0.9  | 6.757e-01 | 0.22430  |
| 0.1  | DCP | 1.2  | 6.757e-01 | 0.52430  |
| 0.3  | DCP | 1.7  | 1.762e+00 | -0.06180 |
| 0.3  | DCP | 1.3  | 1.762e+00 | -0.46180 |
| 1.0  | DCP | 2.5  | 3.636e+00 | -1.13618 |
| 1.0  | DCP | 5.1  | 3.636e+00 | 1.46382  |
| 3.0  | DCP | 2.5  | 3.048e+00 | -0.54814 |
| 5.0  | DCP | 1.9  | 1.603e+00 | 0.29707  |
| 5.0  | DCP | 1.7  | 1.603e+00 | 0.09707  |
| 10.0 | DCP | 0.5  | 2.533e-01 | 0.24675  |
| 10.0 | DCP | 0.9  | 2.533e-01 | 0.64675  |
| 17.0 | DCP | 0.9  | 1.823e-02 | 0.88177  |
| 17.0 | DCP | 1.2  | 1.823e-02 | 1.18177  |
| 26.0 | DCP | 0.7  | 6.176e-04 | 0.69938  |
| 1.0  | DCA | 0.5  | 1.147e+00 | -0.64746 |
| 1.0  | DCA | 0.5  | 1.147e+00 | -0.64746 |
| 3.0  | DCA | 4.5  | 4.354e+00 | 0.14592  |
| 5.0  | DCA | 6.6  | 5.725e+00 | 0.87455  |
| 5.0  | DCA | 5.7  | 5.725e+00 | -0.02545 |
| 10.0 | DCA | 5.1  | 5.002e+00 | 0.09788  |
| 10.0 | DCA | 4.3  | 5.002e+00 | -0.70212 |
| 17.0 | DCA | 2.3  | 2.808e+00 | -0.50782 |
| 17.0 | DCA | 2.2  | 2.808e+00 | -0.60782 |
| 26.0 | DCA | 2.1  | 1.225e+00 | 0.87540  |
| 26.0 | DCA | 2.1  | 1.225e+00 | 0.87540  |

**Listing 29:** SFO-SFO(ns)-SFO fit to Site I2 data, variance by variable

```

mkin version used for fitting: 1.0.4.9000
R version used for fitting: 4.1.0
Date of fit: Mon Jul 26 12:18:33 2021
Date of summary: Mon Jul 26 18:52:53 2021

Equations:
d_D24/dt = - k_D24 * D24
d_DCP/dt = + f_D24_to_DCP * k_D24 * D24 - k_DCP * DCP
d_DCA/dt = + k_DCP * DCP - k_DCA * DCA

Model predictions using solution type deSolve

Fitted using 1587 model solutions performed in 1.557 s

Error model: Variance unique to each observed variable

Error model algorithm: d_3
Direct fitting and three-step fitting yield approximately the same likelihood

Starting values for parameters to be optimised:
      value  type
D24_0      98.9000 state
k_D24       0.1000 deparm
k_DCP       0.1001 deparm
k_DCA       0.1002 deparm
f_D24_to_DCP 0.5000 deparm
sigma_D24    3.0000 error
sigma_DCP    3.0000 error
sigma_DCA    3.0000 error

Starting values for the transformed parameters actually optimised:
      value lower upper
D24_0      98.900000 -Inf  Inf
log_k_D24  -2.302585 -Inf  Inf
log_k_DCP  -2.301586 -Inf  Inf
log_k_DCA  -2.300587 -Inf  Inf
f_D24_qlogis 0.000000 -Inf  Inf
sigma_D24    3.000000  0  Inf
sigma_DCP    3.000000  0  Inf
sigma_DCA    3.000000  0  Inf

Fixed parameter values:
      value type
DCP_0      0 state
DCA_0      0 state

Warning(s):
Observations with value of zero were removed from the data

Results:
      AIC      BIC    logLik
172.2067 186.1081 -78.10336

Optimised, transformed parameters with symmetric confidence intervals:
      Estimate Std. Error Lower Upper
D24_0      98.3800    1.88800 94.5400 102.2000
log_k_D24   -0.9532    0.06953 -1.0940 -0.8119
log_k_DCP   -0.4731    0.14330 -0.7643 -0.1818
log_k_DCA   -2.0670    0.16300 -2.3980 -1.7360
f_D24_qlogis -1.9990    0.11750 -2.2380 -1.7610
sigma_D24    4.3150    0.74970  2.7910  5.8390
sigma_DCP    0.8468    0.16570  0.5100  1.1840
sigma_DCA    0.6939    0.15520  0.3786  1.0090

```

## Parameter correlation:

|              | D24_0     | log_k_D24 | log_k_DCP | log_k_DCA | f_D24_qlogis | sigma_D24 |
|--------------|-----------|-----------|-----------|-----------|--------------|-----------|
| D24_0        | 1.00000   | 0.4443    | -0.06860  | -0.14068  | -0.3516      | 0.07139   |
| log_k_D24    | 0.44429   | 1.00000   | -0.15440  | -0.31665  | -0.4562      | 0.16069   |
| log_k_DCP    | -0.06860  | -0.1544   | 1.00000   | -0.10310  | -0.0927      | -0.02481  |
| log_k_DCA    | -0.14068  | -0.3167   | -0.10310  | 1.00000   | 0.8205       | -0.05088  |
| f_D24_qlogis | -0.35155  | -0.4562   | -0.09270  | 0.82049   | 1.00000      | -0.07330  |
| sigma_D24    | 0.07139   | 0.1607    | -0.02481  | -0.05088  | -0.0733      | 1.00000   |
| sigma_DCP    | -0.03110  | -0.0700   | 0.08791   | -0.16990  | -0.1849      | -0.01125  |
| sigma_DCA    | -0.05110  | -0.1150   | -0.06812  | 0.25036   | 0.2940       | -0.01848  |
|              | sigma_DCP | sigma_DCA |           |           |              |           |
| D24_0        | -0.03110  | -0.05110  |           |           |              |           |
| log_k_D24    | -0.07000  | -0.11502  |           |           |              |           |
| log_k_DCP    | 0.08791   | -0.06812  |           |           |              |           |
| log_k_DCA    | -0.16990  | 0.25036   |           |           |              |           |
| f_D24_qlogis | -0.18492  | 0.29402   |           |           |              |           |
| sigma_D24    | -0.01125  | -0.01848  |           |           |              |           |
| sigma_DCP    | 1.00000   | -0.06161  |           |           |              |           |
| sigma_DCA    | -0.06161  | 1.00000   |           |           |              |           |

## Backtransformed parameters:

Confidence intervals for internally transformed parameters are asymmetric.  
t-test (unrealistically) based on the assumption of normal distribution  
for estimators of untransformed parameters.

|              | Estimate | t value | Pr(>t)    | Lower    | Upper    |
|--------------|----------|---------|-----------|----------|----------|
| D24_0        | 98.3800  | 52.100  | 2.546e-34 | 94.54000 | 102.2000 |
| k_D24        | 0.3855   | 14.380  | 2.560e-16 | 0.33470  | 0.4440   |
| k_DCP        | 0.6231   | 6.977   | 2.389e-08 | 0.46560  | 0.8338   |
| k_DCA        | 0.1265   | 6.136   | 2.872e-07 | 0.09086  | 0.1762   |
| f_D24_to_DCP | 0.1193   | 9.664   | 1.388e-11 | 0.09638  | 0.1467   |
| sigma_D24    | 4.3150   | 5.755   | 8.957e-07 | 2.79100  | 5.8390   |
| sigma_DCP    | 0.8468   | 5.110   | 6.185e-06 | 0.51000  | 1.1840   |
| sigma_DCA    | 0.6939   | 4.472   | 4.104e-05 | 0.37860  | 1.0090   |

## FOCUS Chi2 error levels in percent:

|          | err.min | n.optim | df |
|----------|---------|---------|----|
| All data | 12.714  | 5       | 18 |
| D24      | 7.583   | 2       | 7  |
| DCP      | 32.617  | 2       | 6  |
| DCA      | 13.568  | 1       | 5  |

## Resulting formation fractions:

ff  
D24\_DCP 0.1193  
D24\_sink 0.8807

## Estimated disappearance times:

DT50 DT90  
D24 1.798 5.973  
DCP 1.112 3.695  
DCA 5.478 18.197

## Data:

| time | variable | observed | predicted | residual |
|------|----------|----------|-----------|----------|
| 0.0  | D24      | 99.0     | 9.838e+01 | 0.62398  |
| 0.0  | D24      | 98.8     | 9.838e+01 | 0.42398  |
| 0.1  | D24      | 90.1     | 9.466e+01 | -4.55566 |
| 0.1  | D24      | 89.2     | 9.466e+01 | -5.45566 |
| 0.3  | D24      | 86.3     | 8.763e+01 | -1.33171 |
| 0.3  | D24      | 86.5     | 8.763e+01 | -1.13171 |
| 1.0  | D24      | 76.7     | 6.691e+01 | 9.79437  |
| 1.0  | D24      | 74.7     | 6.691e+01 | 7.79437  |
| 3.0  | D24      | 33.1     | 3.095e+01 | 2.15365  |
| 5.0  | D24      | 8.8      | 1.431e+01 | -5.51384 |
| 5.0  | D24      | 6.7      | 1.431e+01 | -7.61384 |
| 10.0 | D24      | 3.1      | 2.083e+00 | 1.01732  |
| 10.0 | D24      | 3.2      | 2.083e+00 | 1.11732  |
| 17.0 | D24      | 1.6      | 1.402e-01 | 1.45984  |

|      |     |     |           |          |
|------|-----|-----|-----------|----------|
| 17.0 | D24 | 1.7 | 1.402e-01 | 1.55984  |
| 26.0 | D24 | 1.5 | 4.363e-03 | 1.49564  |
| 26.0 | D24 | 1.9 | 4.363e-03 | 1.89564  |
| 0.1  | DCP | 0.9 | 4.301e-01 | 0.46991  |
| 0.1  | DCP | 1.2 | 4.301e-01 | 0.76991  |
| 0.3  | DCP | 1.7 | 1.167e+00 | 0.53330  |
| 0.3  | DCP | 1.3 | 1.167e+00 | 0.13330  |
| 1.0  | DCP | 2.5 | 2.738e+00 | -0.23814 |
| 1.0  | DCP | 5.1 | 2.738e+00 | 2.36186  |
| 3.0  | DCP | 2.5 | 3.053e+00 | -0.55264 |
| 5.0  | DCP | 1.9 | 1.926e+00 | -0.02566 |
| 5.0  | DCP | 1.7 | 1.926e+00 | -0.22566 |
| 10.0 | DCP | 0.5 | 3.656e-01 | 0.13440  |
| 10.0 | DCP | 0.9 | 3.656e-01 | 0.53440  |
| 17.0 | DCP | 0.9 | 2.665e-02 | 0.87335  |
| 17.0 | DCP | 1.2 | 2.665e-02 | 1.17335  |
| 26.0 | DCP | 0.7 | 8.426e-04 | 0.69916  |
| 1.0  | DCA | 0.5 | 9.702e-01 | -0.47025 |
| 1.0  | DCA | 0.5 | 9.702e-01 | -0.47025 |
| 3.0  | DCA | 4.5 | 4.269e+00 | 0.23111  |
| 5.0  | DCA | 6.6 | 6.036e+00 | 0.56389  |
| 5.0  | DCA | 5.7 | 6.036e+00 | -0.33611 |
| 10.0 | DCA | 5.1 | 5.261e+00 | -0.16080 |
| 10.0 | DCA | 4.3 | 5.261e+00 | -0.96080 |
| 17.0 | DCA | 2.3 | 2.485e+00 | -0.18550 |
| 17.0 | DCA | 2.2 | 2.485e+00 | -0.28550 |
| 26.0 | DCA | 2.1 | 8.145e-01 | 1.28546  |
| 26.0 | DCA | 2.1 | 8.145e-01 | 1.28546  |

**Listing 30:** SFO-SFO-SFO fit to Site I2 data, two-component error

```

mkin version used for fitting: 1.0.4.9000
R version used for fitting: 4.1.0
Date of fit: Mon Jul 26 12:18:41 2021
Date of summary: Mon Jul 26 18:52:53 2021

Equations:
d_D24/dt = - k_D24 * D24
d_DCP/dt = + f_D24_to_DCP * k_D24 * D24 - k_DCP * DCP
d_DCA/dt = + f_DCP_to_DCA * k_DCP * DCP - k_DCA * DCA

Model predictions using solution type deSolve

Fitted using 1585 model solutions performed in 1.417 s

Error model: Two-component variance function

Error model algorithm: d_3
Direct fitting and three-step fitting yield approximately the same likelihood

Starting values for parameters to be optimised:
      value  type
D24_0      98.9000 state
k_D24       0.1000 deparm
k_DCP       0.1001 deparm
k_DCA       0.1002 deparm
f_D24_to_DCP 0.5000 deparm
f_DCP_to_DCA 0.5000 deparm
sigma_low   0.1000 error
rsd_high    0.1000 error

Starting values for the transformed parameters actually optimised:
      value lower upper
D24_0      98.900000 -Inf  Inf
log_k_D24  -2.302585 -Inf  Inf
log_k_DCP  -2.301586 -Inf  Inf
log_k_DCA  -2.300587 -Inf  Inf
f_D24_qlogis 0.000000 -Inf  Inf
f_DCP_qlogis 0.000000 -Inf  Inf
sigma_low   0.100000  0    Inf
rsd_high    0.100000  0    Inf

Fixed parameter values:
      value type
DCP_0      0 state
DCA_0      0 state

Warning(s):
Observations with value of zero were removed from the data

Results:
      AIC      BIC    logLik
183.2611 197.1625 -83.63056

Optimised, transformed parameters with symmetric confidence intervals:
      Estimate Std. Error Lower Upper
D24_0      99.63000    6.34600 86.73000 112.5000
log_k_D24  -0.84600    0.09454 -1.03800 -0.6539
log_k_DCP  -0.09161    0.34640 -0.79560  0.6123
log_k_DCA  -2.46900    0.28460 -3.04700 -1.8900
f_D24_qlogis -1.62300    0.36320 -2.36100 -0.8851
f_DCP_qlogis  0.14060    0.79990 -1.48500  1.7660
sigma_low   1.00000    0.16320  0.66850  1.3320
rsd_high    0.13750    0.03978  0.05669  0.2184

```

## Parameter correlation:

|              | D24_0     | log_k_D24 | log_k_DCP | log_k_DCA | f_D24_qlogis | f_DCP_qlogis |
|--------------|-----------|-----------|-----------|-----------|--------------|--------------|
| D24_0        | 1.00000   | 0.74432   | -0.1985   | -0.01707  | -0.4769      | 0.2104       |
| log_k_D24    | 0.74432   | 1.00000   | -0.2677   | -0.03197  | -0.5168      | 0.2777       |
| log_k_DCP    | -0.19846  | -0.26774  | 1.0000    | -0.38978  | 0.7818       | -0.8082      |
| log_k_DCA    | -0.01707  | -0.03197  | -0.3898   | 1.00000   | -0.2611      | 0.5915       |
| f_D24_qlogis | -0.47690  | -0.51684  | 0.7818    | -0.26110  | 1.00000      | -0.8713      |
| f_DCP_qlogis | 0.21039   | 0.27767   | -0.8082   | 0.59151   | -0.8713      | 1.00000      |
| sigma_low    | 0.35330   | 0.46788   | -0.1190   | 0.03394   | -0.2478      | 0.1564       |
| rsd_high     | -0.50806  | -0.56916  | 0.1451    | -0.04139  | 0.3018       | -0.1908      |
|              | sigma_low | rsd_high  |           |           |              |              |
| D24_0        | 0.35330   | -0.50806  |           |           |              |              |
| log_k_D24    | 0.46788   | -0.56916  |           |           |              |              |
| log_k_DCP    | -0.11896  | 0.14505   |           |           |              |              |
| log_k_DCA    | 0.03394   | -0.04139  |           |           |              |              |
| f_D24_qlogis | -0.24775  | 0.30176   |           |           |              |              |
| f_DCP_qlogis | 0.15643   | -0.19079  |           |           |              |              |
| sigma_low    | 1.00000   | -0.42925  |           |           |              |              |
| rsd_high     | -0.42925  | 1.00000   |           |           |              |              |

## Backtransformed parameters:

Confidence intervals for internally transformed parameters are asymmetric.  
t-test (unrealistically) based on the assumption of normal distribution  
for estimators of untransformed parameters.

|              | Estimate | t value | Pr(>t)    | Lower    | Upper    |
|--------------|----------|---------|-----------|----------|----------|
| D24_0        | 99.63000 | 15.700  | 1.898e-17 | 86.73000 | 112.5000 |
| k_D24        | 0.42910  | 10.580  | 1.358e-12 | 0.35410  | 0.5200   |
| k_DCP        | 0.91250  | 2.887   | 3.358e-03 | 0.45130  | 1.8450   |
| k_DCA        | 0.08469  | 3.513   | 6.366e-04 | 0.04749  | 0.1510   |
| f_D24_to_DCP | 0.16480  | 3.296   | 1.150e-03 | 0.08616  | 0.2921   |
| f_DCP_to_DCA | 0.53510  | 2.689   | 5.512e-03 | 0.18470  | 0.8540   |
| sigma_low    | 1.00000  | 6.129   | 2.926e-07 | 0.66850  | 1.3320   |
| rsd_high     | 0.13750  | 3.458   | 7.421e-04 | 0.05669  | 0.2184   |

## FOCUS Chi2 error levels in percent:

|          | err.min | n.optim | df |
|----------|---------|---------|----|
| All data | 14.794  | 6       | 17 |
| D24      | 8.698   | 2       | 7  |
| DCP      | 26.949  | 2       | 6  |
| DCA      | 12.709  | 2       | 4  |

## Resulting formation fractions:

|          | ff     |
|----------|--------|
| D24_DCP  | 0.1648 |
| D24_sink | 0.8352 |
| DCP_DCA  | 0.5351 |
| DCP_sink | 0.4649 |

## Estimated disappearance times:

|     | DT50   | DT90   |
|-----|--------|--------|
| D24 | 1.6152 | 5.366  |
| DCP | 0.7596 | 2.523  |
| DCA | 8.1846 | 27.189 |

## Data:

| time | variable | observed | predicted | residual |
|------|----------|----------|-----------|----------|
| 0.0  | D24      | 99.0     | 9.963e+01 | -0.62996 |
| 0.0  | D24      | 98.8     | 9.963e+01 | -0.82996 |
| 0.1  | D24      | 90.1     | 9.544e+01 | -5.34496 |
| 0.1  | D24      | 89.2     | 9.544e+01 | -6.24496 |
| 0.3  | D24      | 86.3     | 8.759e+01 | -1.29494 |
| 0.3  | D24      | 86.5     | 8.759e+01 | -1.09494 |
| 1.0  | D24      | 76.7     | 6.487e+01 | 11.83354 |
| 1.0  | D24      | 74.7     | 6.487e+01 | 9.83354  |
| 3.0  | D24      | 33.1     | 2.750e+01 | 5.60329  |
| 5.0  | D24      | 8.8      | 1.166e+01 | -2.85578 |
| 5.0  | D24      | 6.7      | 1.166e+01 | -4.95578 |
| 10.0 | D24      | 3.1      | 1.364e+00 | 1.73638  |

|      |     |     |           |          |
|------|-----|-----|-----------|----------|
| 10.0 | D24 | 3.2 | 1.364e+00 | 1.83638  |
| 17.0 | D24 | 1.6 | 6.762e-02 | 1.53238  |
| 17.0 | D24 | 1.7 | 6.762e-02 | 1.63238  |
| 26.0 | D24 | 1.5 | 1.422e-03 | 1.49858  |
| 26.0 | D24 | 1.9 | 1.422e-03 | 1.89858  |
| 0.1  | DCP | 0.9 | 6.587e-01 | 0.24125  |
| 0.1  | DCP | 1.2 | 6.587e-01 | 0.54125  |
| 0.3  | DCP | 1.7 | 1.729e+00 | -0.02947 |
| 0.3  | DCP | 1.3 | 1.729e+00 | -0.42947 |
| 1.0  | DCP | 2.5 | 3.637e+00 | -1.13666 |
| 1.0  | DCP | 5.1 | 3.637e+00 | 1.46334  |
| 3.0  | DCP | 2.5 | 3.079e+00 | -0.57864 |
| 5.0  | DCP | 1.9 | 1.553e+00 | 0.34716  |
| 5.0  | DCP | 1.7 | 1.553e+00 | 0.14716  |
| 10.0 | DCP | 0.5 | 1.979e-01 | 0.30212  |
| 10.0 | DCP | 0.9 | 1.979e-01 | 0.70212  |
| 17.0 | DCP | 0.9 | 9.889e-03 | 0.89011  |
| 17.0 | DCP | 1.2 | 9.889e-03 | 1.19011  |
| 26.0 | DCP | 0.7 | 2.079e-04 | 0.69979  |
| 1.0  | DCA | 0.5 | 1.084e+00 | -0.58426 |
| 1.0  | DCA | 0.5 | 1.084e+00 | -0.58426 |
| 3.0  | DCA | 4.5 | 4.211e+00 | 0.28910  |
| 5.0  | DCA | 6.6 | 5.571e+00 | 1.02904  |
| 5.0  | DCA | 5.7 | 5.571e+00 | 0.12904  |
| 10.0 | DCA | 5.1 | 4.890e+00 | 0.21030  |
| 10.0 | DCA | 4.3 | 4.890e+00 | -0.58970 |
| 17.0 | DCA | 2.3 | 2.845e+00 | -0.54459 |
| 17.0 | DCA | 2.2 | 2.845e+00 | -0.64459 |
| 26.0 | DCA | 2.1 | 1.334e+00 | 0.76636  |
| 26.0 | DCA | 2.1 | 1.334e+00 | 0.76636  |



**Listing 31:** SFO-SFO(ns)-SFO fit to Site I2 data, two-component error

```

mkin version used for fitting: 1.0.4.9000
R version used for fitting: 4.1.0
Date of fit: Mon Jul 26 12:18:41 2021
Date of summary: Mon Jul 26 18:52:53 2021

Equations:
d_D24/dt = - k_D24 * D24
d_DCP/dt = + f_D24_to_DCP * k_D24 * D24 - k_DCP * DCP
d_DCA/dt = + k_DCP * DCP - k_DCA * DCA

Model predictions using solution type deSolve

Fitted using 1467 model solutions performed in 1.364 s

Error model: Two-component variance function

Error model algorithm: d_3
Direct fitting and three-step fitting yield approximately the same likelihood

Starting values for parameters to be optimised:
      value  type
D24_0      98.9000 state
k_D24       0.1000 deparm
k_DCP       0.1001 deparm
k_DCA       0.1002 deparm
f_D24_to_DCP 0.5000 deparm
sigma_low   0.1000 error
rsd_high    0.1000 error

Starting values for the transformed parameters actually optimised:
      value lower upper
D24_0      98.900000 -Inf  Inf
log_k_D24  -2.302585 -Inf  Inf
log_k_DCP  -2.301586 -Inf  Inf
log_k_DCA  -2.300587 -Inf  Inf
f_D24_qlogis 0.000000 -Inf  Inf
sigma_low   0.100000  0    Inf
rsd_high    0.100000  0    Inf

Fixed parameter values:
      value  type
DCP_0     0 state
DCA_0     0 state

Warning(s):
Observations with value of zero were removed from the data

Results:
      AIC      BIC    logLik
183.6597 195.8234 -84.82987

Optimised, transformed parameters with symmetric confidence intervals:
      Estimate Std. Error  Lower  Upper
D24_0      101.1000    5.47500  90.00000 112.2000
log_k_D24   -0.8175    0.06878 -0.95710 -0.6779
log_k_DCP   -0.5396    0.20290 -0.95150 -0.1277
log_k_DCA   -2.1610    0.23340 -2.63500 -1.6870
f_D24_qlogis -2.1050    0.16620 -2.44300 -1.7680
sigma_low    1.0680    0.15350  0.75620  1.3790
rsd_high     0.1303    0.03278  0.06373  0.1968

Parameter correlation:
      D24_0 log_k_D24 log_k_DCP log_k_DCA f_D24_qlogis sigma_low

```

|              |         |          |          |           |          |           |
|--------------|---------|----------|----------|-----------|----------|-----------|
| D24_0        | 1.0000  | 0.65912  | -0.05990 | -0.109501 | -0.50246 | 0.139785  |
| log_k_D24    | 0.6591  | 1.00000  | -0.09873 | -0.176886 | -0.45925 | 0.180166  |
| log_k_DCP    | -0.0599 | -0.09873 | 1.00000  | 0.051417  | 0.10586  | 0.011204  |
| log_k_DCA    | -0.1095 | -0.17689 | 0.05142  | 1.000000  | 0.67609  | 0.008297  |
| f_D24_qlogis | -0.5025 | -0.45925 | 0.10586  | 0.676087  | 1.00000  | -0.079877 |
| sigma_low    | 0.1398  | 0.18017  | 0.01120  | 0.008297  | -0.07988 | 1.000000  |
| rsd_high     | -0.2882 | -0.24193 | -0.01513 | -0.010664 | 0.10727  | -0.249670 |

|          |  |
|----------|--|
| rsd_high |  |
|----------|--|

|       |          |
|-------|----------|
| D24_0 | -0.28818 |
|-------|----------|

|           |          |
|-----------|----------|
| log_k_D24 | -0.24193 |
|-----------|----------|

|           |          |
|-----------|----------|
| log_k_DCP | -0.01513 |
|-----------|----------|

|           |          |
|-----------|----------|
| log_k_DCA | -0.01066 |
|-----------|----------|

|              |         |
|--------------|---------|
| f_D24_qlogis | 0.10727 |
|--------------|---------|

|           |          |
|-----------|----------|
| sigma_low | -0.24967 |
|-----------|----------|

|          |         |
|----------|---------|
| rsd_high | 1.00000 |
|----------|---------|

Backtransformed parameters:

Confidence intervals for internally transformed parameters are asymmetric.

t-test (unrealistically) based on the assumption of normal distribution

for estimators of untransformed parameters.

|              | Estimate | t value | Pr(>t)    | Lower    | Upper    |
|--------------|----------|---------|-----------|----------|----------|
| D24_0        | 101.1000 | 18.470  | 6.308e-20 | 90.00000 | 112.2000 |
| k_D24        | 0.4415   | 14.540  | 1.059e-16 | 0.38400  | 0.5077   |
| k_DCP        | 0.5830   | 4.929   | 9.942e-06 | 0.38620  | 0.8801   |
| k_DCA        | 0.1152   | 4.284   | 6.817e-05 | 0.07172  | 0.1851   |
| f_D24_to_DCP | 0.1086   | 6.750   | 4.024e-08 | 0.07998  | 0.1458   |
| sigma_low    | 1.0680   | 6.956   | 2.174e-08 | 0.75620  | 1.3790   |
| rsd_high     | 0.1303   | 3.974   | 1.681e-04 | 0.06373  | 0.1968   |

FOCUS Chi2 error levels in percent:

|          | err.min | n.optim | df |
|----------|---------|---------|----|
| All data | 15.329  | 5       | 18 |
| D24      | 9.205   | 2       | 7  |
| DCP      | 31.504  | 2       | 6  |
| DCA      | 12.887  | 1       | 5  |

Resulting formation fractions:

| ff              |
|-----------------|
| D24_DCP 0.1086  |
| D24_sink 0.8914 |

Estimated disappearance times:

|     | DT50  | DT90   |
|-----|-------|--------|
| D24 | 1.570 | 5.215  |
| DCP | 1.189 | 3.950  |
| DCA | 6.016 | 19.986 |

Data:

| time | variable | observed | predicted | residual |
|------|----------|----------|-----------|----------|
| 0.0  | D24      | 99.0     | 1.011e+02 | -2.11594 |
| 0.0  | D24      | 98.8     | 1.011e+02 | -2.31594 |
| 0.1  | D24      | 90.1     | 9.675e+01 | -6.64842 |
| 0.1  | D24      | 89.2     | 9.675e+01 | -7.54842 |
| 0.3  | D24      | 86.3     | 8.857e+01 | -2.27117 |
| 0.3  | D24      | 86.5     | 8.857e+01 | -2.07117 |
| 1.0  | D24      | 76.7     | 6.502e+01 | 11.67771 |
| 1.0  | D24      | 74.7     | 6.502e+01 | 9.67771  |
| 3.0  | D24      | 33.1     | 2.689e+01 | 6.21268  |
| 5.0  | D24      | 8.8      | 1.112e+01 | -2.31816 |
| 5.0  | D24      | 6.7      | 1.112e+01 | -4.41816 |
| 10.0 | D24      | 3.1      | 1.222e+00 | 1.87751  |
| 10.0 | D24      | 3.2      | 1.222e+00 | 1.97751  |
| 17.0 | D24      | 1.6      | 5.558e-02 | 1.54442  |
| 17.0 | D24      | 1.7      | 5.558e-02 | 1.64442  |
| 26.0 | D24      | 1.5      | 1.045e-03 | 1.49895  |
| 26.0 | D24      | 1.9      | 1.045e-03 | 1.89895  |
| 0.1  | DCP      | 0.9      | 4.606e-01 | 0.43940  |
| 0.1  | DCP      | 1.2      | 4.606e-01 | 0.73940  |
| 0.3  | DCP      | 1.7      | 1.247e+00 | 0.45268  |

|      |     |     |           |          |
|------|-----|-----|-----------|----------|
| 0.3  | DCP | 1.3 | 1.247e+00 | 0.05268  |
| 1.0  | DCP | 2.5 | 2.907e+00 | -0.40708 |
| 1.0  | DCP | 5.1 | 2.907e+00 | 2.19292  |
| 3.0  | DCP | 2.5 | 3.152e+00 | -0.65159 |
| 5.0  | DCP | 1.9 | 1.911e+00 | -0.01073 |
| 5.0  | DCP | 1.7 | 1.911e+00 | -0.21073 |
| 10.0 | DCP | 0.5 | 3.137e-01 | 0.18632  |
| 10.0 | DCP | 0.9 | 3.137e-01 | 0.58632  |
| 17.0 | DCP | 0.9 | 1.714e-02 | 0.88286  |
| 17.0 | DCP | 1.2 | 1.714e-02 | 1.18286  |
| 26.0 | DCP | 0.7 | 3.453e-04 | 0.69965  |
| 1.0  | DCA | 0.5 | 9.712e-01 | -0.47117 |
| 1.0  | DCA | 0.5 | 9.712e-01 | -0.47117 |
| 3.0  | DCA | 4.5 | 4.254e+00 | 0.24646  |
| 5.0  | DCA | 6.6 | 5.991e+00 | 0.60940  |
| 5.0  | DCA | 5.7 | 5.991e+00 | -0.29060 |
| 10.0 | DCA | 5.1 | 5.236e+00 | -0.13563 |
| 10.0 | DCA | 4.3 | 5.236e+00 | -0.93563 |
| 17.0 | DCA | 2.3 | 2.580e+00 | -0.28030 |
| 17.0 | DCA | 2.2 | 2.580e+00 | -0.38030 |
| 26.0 | DCA | 2.1 | 9.254e-01 | 1.17456  |
| 26.0 | DCA | 2.1 | 9.254e-01 | 1.17456  |

## Listings for simultaneous pathway fits for 2,4-D

### Listing 32: SFO-SFO-SFO fit with nlme to 2,4-D data, two-component error

```

nlme version used for fitting:      3.1.152
mkin version used for pre-fitting:  1.0.4.9000
R version used for fitting:         4.1.0
Date of fit:      Mon Jul 26 12:21:13 2021
Date of summary: Mon Jul 26 18:52:53 2021

Equations:
d_D24/dt = - k_D24 * D24
d_DCP/dt = + f_D24_to_DCP * k_D24 * D24 - k_DCP * DCP
d_DCA/dt = + f_DCP_to_DCA * k_DCP * DCP - k_DCA * DCA

Data:
173 observations of 3 variable(s) grouped in 5 datasets

Model predictions using solution type deSolve

Fitted in 78.455 s using 12 iterations

Variance model: Two-component variance function

Mean of starting values for individual parameters:
      D24_0    log_k_D24    log_k_DCP    log_k_DCA f_D24_qlogis f_DCP_qlogis
      95.5434      -1.8227      -0.6325      -5.7005      -0.6040       7.3117

Fixed degradation parameter values:
      value type
DCP_0      0 state
DCA_0      0 state

Results:

      AIC    BIC logLik
      923.8 967.9 -447.9

Optimised, transformed parameters with symmetric confidence intervals:
      lower    est.    upper
D24_0      93.5213 97.3111 101.1010
log_k_D24  -3.1555 -1.7827  -0.4100
log_k_DCP  -0.8418 -0.1025   0.6367
log_k_DCA  -3.8434 -2.4736  -1.1038
f_D24_qlogis -1.1751 -0.7874  -0.3998
f_DCP_qlogis -0.9104 -0.1960   0.5184

Correlation:
      D24_0  l__D24 l__DCP l__DCA f_D24_
log_k_D24    0.024
log_k_DCP   -0.043 -0.003
log_k_DCA   -0.005  0.000 -0.047
f_D24_qlogis -0.292 -0.013  0.389 -0.076
f_DCP_qlogis  0.077  0.005 -0.379  0.209 -0.853

Random effects:
Formula: list(D24_0 ~ 1, log_k_D24 ~ 1, log_k_DCP ~ 1, log_k_DCA ~ 1,      f_D24_qlogis ~ 1, f_DCP_qlogis ~ 1)
Level: ds
Structure: Diagonal
      D24_0 log_k_D24 log_k_DCP log_k_DCA f_D24_qlogis f_DCP_qlogis
StdDev: 0.0009423      1.553      0.6607      1.165      4.726e-07      2.65e-05
Residual
StdDev:      1

Variance function:
Structure: Constant plus proportion of variance covariate
Formula: ~fitted(.)
Parameter estimates:

```

```

      const      prop
1.6146751 0.1165276

```

Backtransformed parameters with asymmetric confidence intervals:

```

              lower      est.      upper
D24_0        93.52130 97.31115 101.1010
k_D24         0.04262  0.16818  0.6636
k_DCP         0.43094  0.90255  1.8903
k_DCA         0.02142  0.08428  0.3316
f_D24_to_DCP  0.23594  0.31272  0.4014
f_DCP_to_DCA  0.28692  0.45116  0.6268

```

Resulting formation fractions:

```

      ff
D24_DCP  0.3127
D24_sink 0.6873
DCP_DCA  0.4512
DCP_sink 0.5488

```

Estimated disappearance times:

```

      DT50  DT90
D24 4.122 13.691
DCP 0.768 2.551
DCA 8.225 27.321

```

**Listing 33:** SFO-SFO(ns)-SFO fit with nlme to 2,4-D data, constant variance

```

nlme version used for fitting:      3.1.152
mkin version used for pre-fitting:  1.0.4.9000
R version used for fitting:        4.1.0
Date of fit:      Mon Jul 26 12:19:30 2021
Date of summary: Mon Jul 26 18:52:53 2021

Equations:
d_D24/dt = - k_D24 * D24
d_DCP/dt = + f_D24_to_DCP * k_D24 * D24 - k_DCP * DCP
d_DCA/dt = + k_DCP * DCP - k_DCA * DCA

Data:
173 observations of 3 variable(s) grouped in 5 datasets

Model predictions using solution type deSolve

Fitted in 1.05 s using 3 iterations

Variance model: Constant variance

Mean of starting values for individual parameters:
      D24_0    log_k_D24    log_k_DCP    log_k_DCA f_D24_qlogis
95.7003      -1.8362      -0.9675      -2.4067      -1.0655

Fixed degradation parameter values:
      value type
DCP_0      0 state
DCA_0      0 state

Results:

      AIC  BIC logLik
989.4 1024 -483.7

Optimised, transformed parameters with symmetric confidence intervals:
      lower est. upper
D24_0      92.757 95.8296 98.9019
log_k_D24   -3.257 -1.8313 -0.4055
log_k_DCP   -1.147 -0.8142 -0.4819
log_k_DCA   -2.339 -1.8816 -1.4237
f_D24_qlogis -2.007 -1.4061 -0.8047

Correlation:
      D24_0  l__D24  l__DCP  l__DCA
log_k_D24      0.008
log_k_DCP     -0.010 -0.002
log_k_DCA     -0.014 -0.002  0.242
f_D24_qlogis  -0.024 -0.003  0.128  0.335

Random effects:
Formula: list(D24_0 ~ 1, log_k_D24 ~ 1, log_k_DCP ~ 1, log_k_DCA ~ 1,      f_D24_qlogis ~ 1)
Level: ds
Structure: Diagonal
      D24_0 log_k_D24 log_k_DCP log_k_DCA f_D24_qlogis Residual
StdDev: 3.139      1.614  0.004861  0.004537      0.5285      3.416

Backtransformed parameters with asymmetric confidence intervals:
      lower est. upper
D24_0      92.75736 95.8296 98.9019
k_D24       0.03850  0.1602  0.6666
k_DCP       0.31774  0.4430  0.6176
k_DCA       0.09638  0.1524  0.2408
f_D24_to_DCP 0.11843  0.1969  0.3090

```

Resulting formation fractions:

ff

D24\_DCP 0.1969

D24\_sink 0.8031

Estimated disappearance times:

DT50 DT90

D24 4.327 14.373

DCP 1.565 5.198

DCA 4.550 15.114

**Listing 34:** SFO-SFO(ns)-SFO fit with nlme to 2,4-D data, variance by variable

```

nlme version used for fitting:      3.1.152
mkin version used for pre-fitting:  1.0.4.9000
R version used for fitting:         4.1.0
Date of fit:      Mon Jul 26 12:19:53 2021
Date of summary: Mon Jul 26 18:52:53 2021

Equations:
d_D24/dt = - k_D24 * D24
d_DCP/dt = + f_D24_to_DCP * k_D24 * D24 - k_DCP * DCP
d_DCA/dt = + k_DCP * DCP - k_DCA * DCA

Data:
173 observations of 3 variable(s) grouped in 5 datasets

Model predictions using solution type deSolve

Fitted in 21.734 s using 4 iterations

Variance model: Variance unique to each observed variable

Mean of starting values for individual parameters:
      D24_0    log_k_D24    log_k_DCP    log_k_DCA f_D24_qlogis
      95.736      -1.833      -1.020      -2.250      -1.121

Fixed degradation parameter values:
      value type
DCP_0      0 state
DCA_0      0 state

Results:

      AIC    BIC logLik
      883.8  924.8 -428.9

Optimised, transformed parameters with symmetric confidence intervals:
      lower    est.    upper
D24_0      93.642  96.2869  98.9317
log_k_D24  -3.232  -1.8047  -0.3778
log_k_DCP  -1.158  -0.6482  -0.1384
log_k_DCA  -2.938  -1.9624  -0.9865
f_D24_qlogis -1.708  -1.3208  -0.9332

Correlation:
      D24_0    l__D24    l__DCP    l__DCA
log_k_D24      0.018
log_k_DCP     -0.017  -0.002
log_k_DCA     -0.022  -0.003   0.036
f_D24_qlogis  -0.098  -0.009   0.035   0.085

Random effects:
Formula: list(D24_0 ~ 1, log_k_D24 ~ 1, log_k_DCP ~ 1, log_k_DCA ~ 1,      f_D24_qlogis ~ 1)
Level: ds
Structure: Diagonal
      D24_0 log_k_D24 log_k_DCP log_k_DCA f_D24_qlogis Residual
StdDev: 2.026    1.614    0.4922    0.9118    0.3625    5.057

Variance function:
Structure: Different standard deviations per stratum
Formula: ~1 | name
Parameter estimates:
      D24      DCP      DCA
1.0000000 0.2646706 0.2582146

Backtransformed parameters with asymmetric confidence intervals:
      lower    est.    upper

```



|              |          |         |         |
|--------------|----------|---------|---------|
| D24_0        | 93.64207 | 96.2869 | 98.9317 |
| k_D24        | 0.03949  | 0.1645  | 0.6854  |
| k_DCP        | 0.31415  | 0.5230  | 0.8707  |
| k_DCA        | 0.05296  | 0.1405  | 0.3729  |
| f_D24_to_DCP | 0.15338  | 0.2107  | 0.2823  |

Resulting formation fractions:

ff  
D24\_DCP 0.2107  
D24\_sink 0.7893

Estimated disappearance times:

|     | DT50  | DT90   |
|-----|-------|--------|
| D24 | 4.213 | 13.995 |
| DCP | 1.325 | 4.403  |
| DCA | 4.933 | 16.386 |

**Listing 35: SFO-SFO(ns)-SFO fit with nlme to 2,4-D data, two-component error**

```

nlme version used for fitting:      3.1.152
mkin version used for pre-fitting:  1.0.4.9000
R version used for fitting:         4.1.0
Date of fit:      Mon Jul 26 12:21:52 2021
Date of summary: Mon Jul 26 18:52:53 2021

Equations:
d_D24/dt = - k_D24 * D24
d_DCP/dt = + f_D24_to_DCP * k_D24 * D24 - k_DCP * DCP
d_DCA/dt = + k_DCP * DCP - k_DCA * DCA

Data:
173 observations of 3 variable(s) grouped in 5 datasets

Model predictions using solution type deSolve

Fitted in 37.657 s using 7 iterations

Variance model: Two-component variance function

Mean of starting values for individual parameters:
      D24_0    log_k_D24    log_k_DCP    log_k_DCA f_D24_qlogis
      96.0951      -1.8068      -0.9738      -5.5774      -1.0841

Fixed degradation parameter values:
      value type
DCP_0      0 state
DCA_0      0 state

Results:

      AIC    BIC logLik
      916.3 954.1 -446.1

Optimised, transformed parameters with symmetric confidence intervals:
      lower est. upper
D24_0      93.746 97.8594 101.9725
log_k_D24   -3.143 -1.7675  -0.3921
log_k_DCP   -1.223 -0.6892  -0.1552
log_k_DCA   -2.856 -1.9334  -1.0110
f_D24_qlogis -1.753 -1.3758  -0.9987

Correlation:
      D24_0  l__D24  l__DCP  l__DCA
log_k_D24      0.022
log_k_DCP     -0.019 -0.001
log_k_DCA     -0.025 -0.002  0.046
f_D24_qlogis  -0.177 -0.007  0.047  0.110

Random effects:
Formula: list(D24_0 ~ 1, log_k_D24 ~ 1, log_k_DCP ~ 1, log_k_DCA ~ 1,      f_D24_qlogis ~ 1)
Level: ds
Structure: Diagonal
      D24_0 log_k_D24 log_k_DCP log_k_DCA f_D24_qlogis Residual
StdDev: 1.803      1.556      0.5081      0.8317      0.3397      1

Variance function:
Structure: Constant plus proportion of variance covariate
Formula: ~fitted(.)
Parameter estimates:
      const      prop
1.5195327 0.1160781

Backtransformed parameters with asymmetric confidence intervals:
      lower est. upper

```

|              |          |         |          |
|--------------|----------|---------|----------|
| D24_0        | 93.74617 | 97.8594 | 101.9725 |
| k_D24        | 0.04316  | 0.1708  | 0.6756   |
| k_DCP        | 0.29430  | 0.5020  | 0.8563   |
| k_DCA        | 0.05752  | 0.1447  | 0.3638   |
| f_D24_to_DCP | 0.14767  | 0.2017  | 0.2692   |

Resulting formation fractions:

ff

D24\_DCP 0.2017

D24\_sink 0.7983

Estimated disappearance times:

DT50 DT90

D24 4.059 13.484

DCP 1.381 4.587

DCA 4.792 15.917

**Listing 36:** SFO-SFO-SFO fit with saem to 2,4-D data, two-component error

```

saemix version used for fitting:      3.1.9000
mkin version used for pre-fitting:    1.0.4.9000
R version used for fitting:          4.1.0
Date of fit:      Mon Jul 26 13:17:34 2021
Date of summary: Mon Jul 26 18:52:53 2021

Equations:
d_D24/dt = - k_D24 * D24
d_DCP/dt = + f_D24_to_DCP * k_D24 * D24 - k_DCP * DCP
d_DCA/dt = + f_DCP_to_DCA * k_DCP * DCP - k_DCA * DCA

Data:
173 observations of 3 variable(s) grouped in 5 datasets

Model predictions using solution type deSolve

Fitted in 609.293 s using 300, 100 iterations

Variance model: Two-component variance function

Mean of starting values for individual parameters:
      D24_0    log_k_D24    log_k_DCP    log_k_DCA f_D24_qlogis f_DCP_qlogis
      95.5434      -1.8227      -0.2152      -1.8401      -0.6040       7.3117

Fixed degradation parameter values:
None

Results:

Likelihood computed by importance sampling
      AIC    BIC logLik
      907.5 902.1 -439.8

Optimised parameters:
              est.    lower    upper
D24_0         96.3401 92.2207 100.4595
log_k_D24     -1.8115 -3.1745  -0.4486
log_k_DCP     -0.1987 -0.9712   0.5738
log_k_DCA     -2.2408 -3.2736  -1.2080
f_D24_qlogis  -0.8446 -1.5735  -0.1157
f_DCP_qlogis   1.0715 -1.3647   3.5077

Correlation:
      D24_0  l__D24  l__DCP  l__DCA  f_D24_
log_k_D24    0.021
log_k_DCP   -0.026 -0.002
log_k_DCA   -0.016 -0.001 -0.024
f_D24_qlogis -0.127 -0.006  0.122 -0.015
f_DCP_qlogis  0.031  0.002 -0.169  0.139 -0.212

Random effects:
              est.    lower    upper
SD.D24_0      2.1341 -4.2764  8.545
SD.log_k_D24  1.5537  0.5896  2.518
SD.log_k_DCP   0.7366  0.1742  1.299
SD.log_k_DCA   0.9320  0.1577  1.706
SD.f_D24_qlogis 0.6635  0.1256  1.201
SD.f_DCP_qlogis 1.7360 -0.1656  3.637

Variance model:
              est.    lower    upper
a.1 1.3311 1.12223 1.5399
b.1 0.1158 0.09227 0.1394

Backtransformed parameters:

```

|              | est.    | lower    | upper    |
|--------------|---------|----------|----------|
| D24_0        | 96.3401 | 92.22072 | 100.4595 |
| k_D24        | 0.1634  | 0.04182  | 0.6385   |
| k_DCP        | 0.8198  | 0.37861  | 1.7750   |
| k_DCA        | 0.1064  | 0.03787  | 0.2988   |
| f_D24_to_DCP | 0.3006  | 0.17171  | 0.4711   |
| f_DCP_to_DCA | 0.7449  | 0.20348  | 0.9709   |

Resulting formation fractions:

|          | ff     |
|----------|--------|
| D24_DCP  | 0.3006 |
| D24_sink | 0.6994 |
| DCP_DCA  | 0.7449 |
| DCP_sink | 0.2551 |

Estimated disappearance times:

|     | DT50   | DT90   |
|-----|--------|--------|
| D24 | 4.2420 | 14.092 |
| DCP | 0.8455 | 2.809  |
| DCA | 6.5161 | 21.646 |

**Listing 37:** SFO-SFO(ns)-SFO fit with saem to 2,4-D data, constant variance

```

saemix version used for fitting:      3.1.9000
mkin version used for pre-fitting:    1.0.4.9000
R version used for fitting:          4.1.0
Date of fit:      Mon Jul 26 13:54:57 2021
Date of summary: Mon Jul 26 18:52:53 2021

Equations:
d_D24/dt = - k_D24 * D24
d_DCP/dt = + f_D24_to_DCP * k_D24 * D24 - k_DCP * DCP
d_DCA/dt = + k_DCP * DCP - k_DCA * DCA

Data:
173 observations of 3 variable(s) grouped in 5 datasets

Model predictions using solution type deSolve

Fitted in 499.986 s using 300, 100 iterations

Variance model: Constant variance

Mean of starting values for individual parameters:
      D24_0    log_k_D24    log_k_DCP    log_k_DCA f_D24_qlogis
95.7003      -1.8362      -0.6339      -1.4936      -1.0655

Fixed degradation parameter values:
None

Results:

Likelihood computed by importance sampling
      AIC    BIC logLik
989.8 985.5 -483.9

Optimised parameters:
              est.    lower    upper
D24_0         95.7626  92.671  98.8545
log_k_D24     -1.8330  -3.250  -0.4165
log_k_DCP     -0.7683  -1.195  -0.3416
log_k_DCA     -1.9522  -2.594  -1.3100
f_D24_qlogis  -1.4550  -2.038  -0.8723

Correlation:
      D24_0  l__D24  l__DCP  l__DCA
log_k_D24    0.007
log_k_DCP   -0.007 -0.001
log_k_DCA   -0.010 -0.002  0.165
f_D24_qlogis -0.024 -0.003  0.105  0.301

Random effects:
              est.    lower    upper
SD.D24_0      3.1955  0.78394  5.6070
SD.log_k_D24  1.6151  0.61291  2.6173
SD.log_k_DCP  0.2440 -0.25809  0.7461
SD.log_k_DCA  0.3819 -0.27626  1.0401
SD.f_D24_qlogis 0.5044  0.06366  0.9452

Variance model:
      est.    lower    upper
a.1  3.399  3.018  3.781

Backtransformed parameters:
              est.    lower    upper
D24_0         95.7626  92.67063  98.8545
k_D24          0.1599  0.03879  0.6594
k_DCP          0.4638  0.30270  0.7106

```

```
k_DCA      0.1420  0.07468  0.2698
f_D24_to_DCP 0.1892  0.11530  0.2948
```

Resulting formation fractions:

```
      ff
D24_DCP  0.1892
D24_sink 0.8108
```

Estimated disappearance times:

```
      DT50  DT90
D24  4.334 14.397
DCP   1.495  4.965
DCA   4.883 16.220
```

**Listing 38:** SFO-SFO(ns)-SFO fit with saem to 2,4-D data, two-component error

```

saemix version used for fitting:      3.1.9000
mkin version used for pre-fitting:    1.0.4.9000
R version used for fitting:          4.1.0
Date of fit:      Mon Jul 26 14:03:27 2021
Date of summary: Mon Jul 26 18:52:53 2021

Equations:
d_D24/dt = - k_D24 * D24
d_DCP/dt = + f_D24_to_DCP * k_D24 * D24 - k_DCP * DCP
d_DCA/dt = + k_DCP * DCP - k_DCA * DCA

Data:
173 observations of 3 variable(s) grouped in 5 datasets

Model predictions using solution type deSolve

Fitted in 510.096 s using 300, 100 iterations

Variance model: Two-component variance function

Mean of starting values for individual parameters:
      D24_0    log_k_D24    log_k_DCP    log_k_DCA f_D24_qlogis
      96.0951      -1.8068      -0.6419      -1.4862      -1.0841

Fixed degradation parameter values:
None

Results:

Likelihood computed by importance sampling
      AIC    BIC logLik
      913.3 908.6 -444.7

Optimised parameters:
              est.    lower    upper
D24_0         96.4208  92.034 100.8074
log_k_D24     -1.8016  -3.172  -0.4315
log_k_DCP     -0.6535  -1.153  -0.1545
log_k_DCA     -1.9422  -2.869  -1.0157
f_D24_qlogis  -1.3374  -1.762  -0.9131

Correlation:
      D24_0  l__D24  l__DCP  l__DCA
log_k_D24      0.019
log_k_DCP     -0.018 -0.001
log_k_DCA     -0.022 -0.002  0.045
f_D24_qlogis  -0.137 -0.006  0.044  0.098

Random effects:
              est.    lower    upper
SD.D24_0       2.8424 -2.58010  8.2648
SD.log_k_D24    1.5618  0.59263  2.5311
SD.log_k_DCP    0.4739  0.09683  0.8509
SD.log_k_DCA    0.8494  0.15353  1.5452
SD.f_D24_qlogis 0.3949  0.07589  0.7139

Variance model:
              est.    lower    upper
a.1 1.5040 1.27670 1.7313
b.1 0.1127 0.08928 0.1362

Backtransformed parameters:
              est.    lower    upper
D24_0         96.4208  92.03423 100.8074
k_D24          0.1650  0.04193  0.6496

```



|              |        |         |        |
|--------------|--------|---------|--------|
| k_DCP        | 0.5202 | 0.31582 | 0.8568 |
| k_DCA        | 0.1434 | 0.05678 | 0.3622 |
| f_D24_to_DCP | 0.2079 | 0.14657 | 0.2864 |

Resulting formation fractions:  
ff

|          |        |
|----------|--------|
| D24_DCP  | 0.2079 |
| D24_sink | 0.7921 |

Estimated disappearance times:

|     | DT50   | DT90   |
|-----|--------|--------|
| D24 | 4.2000 | 13.952 |
| DCP | 1.332  | 4.426  |
| DCA | 4.834  | 16.058 |

## Listings for separate fits for dimethenamid

### Listing 39: SFO-SFO3 fit to Calke data, constant variance

```

mkin version used for fitting: 1.0.4.9000
R version used for fitting: 4.1.0
Date of fit: Mon Jul 26 14:04:04 2021
Date of summary: Mon Jul 26 18:52:53 2021

Equations:
d_DMTA/dt = - k_DMTA * DMTA
d_M23/dt = + f_DMTA_to_M23 * k_DMTA * DMTA - k_M23 * M23
d_M27/dt = + f_DMTA_to_M27 * k_DMTA * DMTA - k_M27 * M27
d_M31/dt = + f_DMTA_to_M31 * k_DMTA * DMTA - k_M31 * M31

Model predictions using solution type deSolve

Fitted using 1228 model solutions performed in 2.126 s

Error model: Constant variance

Error model algorithm: OLS

Starting values for parameters to be optimised:
      value  type
DMTA_0    97.2500 state
k_DMTA      0.1000 deparm
k_M23       0.1001 deparm
k_M27       0.1002 deparm
k_M31       0.1003 deparm
f_DMTA_to_M23 0.2500 deparm
f_DMTA_to_M27 0.2500 deparm
f_DMTA_to_M31 0.2500 deparm

Starting values for the transformed parameters actually optimised:
      value lower upper
DMTA_0    97.250000 -Inf  Inf
log_k_DMTA -2.302585 -Inf  Inf
log_k_M23  -2.301586 -Inf  Inf
log_k_M27  -2.300587 -Inf  Inf
log_k_M31  -2.299590 -Inf  Inf
f_DMTA_ilr_1 0.000000 -Inf  Inf
f_DMTA_ilr_2 0.000000 -Inf  Inf
f_DMTA_ilr_3 0.000000 -Inf  Inf

Fixed parameter values:
      value  type
M23_0      0 state
M27_0      0 state
M31_0      0 state

Results:
      AIC      BIC    logLik
80.95259 90.77197 -31.47629

Optimised, transformed parameters with symmetric confidence intervals:
      Estimate Std. Error   Lower Upper
DMTA_0    96.7300    0.69360  95.2300  98.2300
log_k_DMTA -3.4760    0.02105 -3.5210 -3.4300
log_k_M23  -4.5010    0.30690 -5.1640 -3.8380
log_k_M27  -7.7920   11.57000 -32.7800  17.2000
log_k_M31  -4.6600    0.84700 -6.4900 -2.8300
f_DMTA_ilr_1 0.7229    0.27270  0.1338  1.3120
f_DMTA_ilr_2 0.3491    0.37670 -0.4647  1.1630
f_DMTA_ilr_3 -2.2510    0.19640 -2.6760 -1.8270
sigma      1.0120    0.15250  0.6823  1.3410

```

## Parameter correlation:

|              | DMTA_0       | log_k_DMTA   | log_k_M23    | log_k_M27  | log_k_M31  |
|--------------|--------------|--------------|--------------|------------|------------|
| DMTA_0       | 1.000e+00    | 4.272e-01    | -3.149e-02   | -1.254e-02 | -1.221e-02 |
| log_k_DMTA   | 4.272e-01    | 1.000e+00    | -7.371e-02   | -2.935e-02 | -2.858e-02 |
| log_k_M23    | -3.149e-02   | -7.371e-02   | 1.000e+00    | 2.163e-03  | 2.107e-03  |
| log_k_M27    | -1.254e-02   | -2.935e-02   | 2.163e-03    | 1.000e+00  | 8.388e-04  |
| log_k_M31    | -1.221e-02   | -2.858e-02   | 2.107e-03    | 8.388e-04  | 1.000e+00  |
| f_DMTA_ilr_1 | -1.942e-03   | -4.545e-03   | 3.593e-01    | -8.134e-01 | 1.299e-04  |
| f_DMTA_ilr_2 | 3.520e-04    | 8.238e-04    | 1.499e-01    | 3.399e-01  | -7.672e-01 |
| f_DMTA_ilr_3 | -7.554e-02   | -1.012e-01   | 2.981e-01    | 5.351e-01  | 6.104e-01  |
| sigma        | 1.187e-08    | 4.048e-08    | 4.757e-08    | 2.098e-08  | 2.754e-08  |
|              | f_DMTA_ilr_1 | f_DMTA_ilr_2 | f_DMTA_ilr_3 | sigma      |            |
| DMTA_0       | -1.942e-03   | 3.520e-04    | -7.554e-02   | 1.187e-08  |            |
| log_k_DMTA   | -4.545e-03   | 8.238e-04    | -1.012e-01   | 4.048e-08  |            |
| log_k_M23    | 3.593e-01    | 1.499e-01    | 2.981e-01    | 4.757e-08  |            |
| log_k_M27    | -8.134e-01   | 3.399e-01    | 5.351e-01    | 2.098e-08  |            |
| log_k_M31    | 1.299e-04    | -7.672e-01   | 6.104e-01    | 2.754e-08  |            |
| f_DMTA_ilr_1 | 1.000e+00    | -2.599e-01   | -3.770e-01   | -2.606e-08 |            |
| f_DMTA_ilr_2 | -2.599e-01   | 1.000e+00    | -3.681e-01   | -5.282e-10 |            |
| f_DMTA_ilr_3 | -3.770e-01   | -3.681e-01   | 1.000e+00    | 5.837e-08  |            |
| sigma        | -2.606e-08   | -5.282e-10   | 5.837e-08    | 1.000e+00  |            |

## Backtransformed parameters:

Confidence intervals for internally transformed parameters are asymmetric.  
t-test (unrealistically) based on the assumption of normal distribution  
for estimators of untransformed parameters.

|               | Estimate  | t value   | Pr(>t)    | Lower     | Upper     |
|---------------|-----------|-----------|-----------|-----------|-----------|
| DMTA_0        | 96.730000 | 139.50000 | 2.491e-22 | 9.523e+01 | 9.823e+01 |
| k_DMTA        | 0.030940  | 47.50000  | 2.910e-16 | 2.957e-02 | 3.238e-02 |
| k_M23         | 0.011090  | 3.25800   | 3.113e-03 | 5.717e-03 | 2.153e-02 |
| k_M27         | 0.000413  | 0.08646   | 4.662e-01 | 5.805e-15 | 2.938e+07 |
| k_M31         | 0.009465  | 1.18100   | 1.294e-01 | 1.519e-03 | 5.899e-02 |
| f_DMTA_to_M23 | 0.114300  | 5.92300   | 2.521e-05 | NA        | NA        |
| f_DMTA_to_M27 | 0.041110  | 2.87600   | 6.499e-03 | NA        | NA        |
| f_DMTA_to_M31 | 0.044690  | 2.38300   | 1.656e-02 | NA        | NA        |
| sigma         | 1.012000  | 6.63300   | 8.148e-06 | 6.823e-01 | 1.341e+00 |

## FOCUS Chi2 error levels in percent:

|          | err.min | n.optim | df |
|----------|---------|---------|----|
| All data | 5.713   | 8       | 9  |
| DMTA     | 2.809   | 2       | 3  |
| M23      | 5.049   | 2       | 2  |
| M27      | 2.057   | 2       | 2  |
| M31      | 13.952  | 2       | 2  |

## Resulting formation fractions:

|           | ff      |
|-----------|---------|
| DMTA_M23  | 0.11426 |
| DMTA_M27  | 0.04111 |
| DMTA_M31  | 0.04469 |
| DMTA_sink | 0.79994 |

## Estimated disappearance times:

|      | DT50    | DT90    |
|------|---------|---------|
| DMTA | 22.40   | 74.42   |
| M23  | 62.48   | 207.54  |
| M27  | 1678.29 | 5575.16 |
| M31  | 73.23   | 243.27  |

## Data:

| time | variable | observed | predicted | residual |
|------|----------|----------|-----------|----------|
| 0    | DMTA     | 95.8     | 96.728    | -0.92756 |
| 0    | DMTA     | 98.7     | 96.728    | 1.97244  |
| 14   | DMTA     | 60.5     | 62.722    | -2.22176 |
| 30   | DMTA     | 39.1     | 38.231    | 0.86948  |
| 59   | DMTA     | 15.2     | 15.585    | -0.38505 |
| 120  | DMTA     | 4.8      | 2.360     | 2.43957  |
| 120  | DMTA     | 4.6      | 2.360     | 2.23957  |
| 14   | M23      | 4.1      | 3.579     | 0.52122  |

|     |     |     |       |          |
|-----|-----|-----|-------|----------|
| 30  | M23 | 5.3 | 5.542 | -0.24214 |
| 59  | M23 | 6.0 | 6.178 | -0.17775 |
| 120 | M23 | 4.3 | 4.130 | 0.16957  |
| 120 | M23 | 4.1 | 4.130 | -0.03043 |
| 14  | M27 | 1.5 | 1.394 | 0.10638  |
| 30  | M27 | 2.4 | 2.388 | 0.01234  |
| 59  | M27 | 3.2 | 3.284 | -0.08380 |
| 120 | M27 | 3.8 | 3.737 | 0.06304  |
| 120 | M27 | 3.7 | 3.737 | -0.03696 |
| 14  | M31 | 2.0 | 1.417 | 0.58343  |
| 30  | M31 | 2.1 | 2.227 | -0.12687 |
| 59  | M31 | 2.2 | 2.560 | -0.35953 |
| 120 | M31 | 1.8 | 1.848 | -0.04820 |
| 120 | M31 | 2.1 | 1.848 | 0.25180  |

**Listing 40:** SFO-SFO3 fit to Calke data, two-component error

```

mkin version used for fitting: 1.0.4.9000
R version used for fitting: 4.1.0
Date of fit: Mon Jul 26 14:04:43 2021
Date of summary: Mon Jul 26 18:52:53 2021

Equations:
d_DMTA/dt = - k_DMTA * DMTA
d_M23/dt = + f_DMTA_to_M23 * k_DMTA * DMTA - k_M23 * M23
d_M27/dt = + f_DMTA_to_M27 * k_DMTA * DMTA - k_M27 * M27
d_M31/dt = + f_DMTA_to_M31 * k_DMTA * DMTA - k_M31 * M31

Model predictions using solution type deSolve

Fitted using 2753 model solutions performed in 4.608 s

Error model: Two-component variance function

Error model algorithm: d_3
Direct fitting and three-step fitting yield approximately the same likelihood

Starting values for parameters to be optimised:
      value  type
DMTA_0    97.2500 state
k_DMTA     0.1000 deparm
k_M23      0.1001 deparm
k_M27      0.1002 deparm
k_M31      0.1003 deparm
f_DMTA_to_M23 0.2500 deparm
f_DMTA_to_M27 0.2500 deparm
f_DMTA_to_M31 0.2500 deparm
sigma_low  0.1000 error
rsd_high   0.1000 error

Starting values for the transformed parameters actually optimised:
      value lower upper
DMTA_0    97.250000 -Inf  Inf
log_k_DMTA -2.302585 -Inf  Inf
log_k_M23  -2.301586 -Inf  Inf
log_k_M27  -2.300587 -Inf  Inf
log_k_M31  -2.299590 -Inf  Inf
f_DMTA_ilr_1 0.000000 -Inf  Inf
f_DMTA_ilr_2 0.000000 -Inf  Inf
f_DMTA_ilr_3 0.000000 -Inf  Inf
sigma_low   0.100000  0    Inf
rsd_high    0.100000  0    Inf

Fixed parameter values:
      value type
M23_0     0 state
M27_0     0 state
M31_0     0 state

Results:
      AIC      BIC   logLik
77.80632 88.71674 -28.90316

Optimised, transformed parameters with symmetric confidence intervals:
      Estimate Std. Error   Lower   Upper
DMTA_0    95.42000    1.96400  91.140000 99.70000
log_k_DMTA -3.51300    0.03850 -3.597000 -3.42900
log_k_M23  -4.46000    0.22940 -4.960000 -3.96000
log_k_M27  -7.30900    5.41000 -19.100000  4.47900
log_k_M31  -4.61600    0.61790 -5.963000 -3.27000
f_DMTA_ilr_1 0.72570    0.20430  0.280700  1.17100

```

```
f_DMTA_ilr_2 0.34850 0.28200 -0.265900 0.96290
f_DMTA_ilr_3 -2.20600 0.15600 -2.546000 -1.86600
sigma_low 0.75090 0.14490 0.435300 1.06700
rsd_high 0.02505 0.01537 -0.008431 0.05852
```

Parameter correlation:

```
      DMTA_0 log_k_DMTA log_k_M23 log_k_M27 log_k_M31 f_DMTA_ilr_1
DMTA_0 1.000000 0.758953 -0.14064 -0.055849 -0.055235 -0.011517
log_k_DMTA 0.758953 1.000000 -0.18492 -0.073529 -0.072676 -0.014931
log_k_M23 -0.140644 -0.184924 1.000000 0.013600 0.013445 0.360924
log_k_M27 -0.055849 -0.073529 0.01360 1.000000 0.005345 -0.808469
log_k_M31 -0.055235 -0.072676 0.01344 0.005345 1.000000 0.001089
f_DMTA_ilr_1 -0.011517 -0.014931 0.36092 -0.808469 0.001089 1.000000
f_DMTA_ilr_2 0.001919 0.002516 0.14931 0.338377 -0.767062 -0.256694
f_DMTA_ilr_3 -0.298031 -0.311980 0.33570 0.525708 0.599252 -0.346511
sigma_low 0.369190 0.460012 -0.08700 -0.034111 -0.033940 -0.008076
rsd_high -0.586697 -0.714306 0.13510 0.052968 0.052703 0.012540
      f_DMTA_ilr_2 f_DMTA_ilr_3 sigma_low rsd_high
DMTA_0 0.001919 -0.2980 0.369190 -0.586697
log_k_DMTA 0.002516 -0.3120 0.460012 -0.714306
log_k_M23 0.149313 0.3357 -0.087001 0.135095
log_k_M27 0.338377 0.5257 -0.034111 0.052968
log_k_M31 -0.767062 0.5993 -0.033940 0.052703
f_DMTA_ilr_1 -0.256694 -0.3465 -0.008076 0.012540
f_DMTA_ilr_2 1.000000 -0.3490 0.001221 -0.001897
f_DMTA_ilr_3 -0.348986 1.0000 -0.147897 0.229652
sigma_low 0.001221 -0.1479 1.000000 -0.412524
rsd_high -0.001897 0.2297 -0.412524 1.000000
```

Backtransformed parameters:

Confidence intervals for internally transformed parameters are asymmetric.  
t-test (unrealistically) based on the assumption of normal distribution  
for estimators of untransformed parameters.

|               | Estimate  | t value | Pr(>t)    | Lower      | Upper    |
|---------------|-----------|---------|-----------|------------|----------|
| DMTA_0        | 9.542e+01 | 48.5900 | 1.891e-15 | 9.114e+01  | 99.70000 |
| k_DMTA        | 2.980e-02 | 25.9700 | 3.237e-12 | 2.740e-02  | 0.03241  |
| k_M23         | 1.156e-02 | 4.3580  | 4.656e-04 | 7.015e-03  | 0.01906  |
| k_M27         | 6.692e-04 | 0.1848  | 4.282e-01 | 5.081e-09  | 88.14000 |
| k_M31         | 9.890e-03 | 1.6180  | 6.578e-02 | 2.573e-03  | 0.03801  |
| f_DMTA_to_M23 | 1.193e-01 | 7.3670  | 4.326e-06 | NA         | NA       |
| f_DMTA_to_M27 | 4.274e-02 | 3.8000  | 1.265e-03 | NA         | NA       |
| f_DMTA_to_M31 | 4.659e-02 | 3.1520  | 4.169e-03 | NA         | NA       |
| sigma_low     | 7.509e-01 | 5.1840  | 1.139e-04 | 4.353e-01  | 1.06700  |
| rsd_high      | 2.505e-02 | 1.6300  | 6.451e-02 | -8.431e-03 | 0.05852  |

FOCUS Chi2 error levels in percent:

|          | err.min | n.optim | df |
|----------|---------|---------|----|
| All data | 6.383   | 8       | 9  |
| DMTA     | 3.158   | 2       | 3  |
| M23      | 5.197   | 2       | 2  |
| M27      | 2.251   | 2       | 2  |
| M31      | 14.133  | 2       | 2  |

Resulting formation fractions:

```
ff
DMTA_M23 0.11928
DMTA_M27 0.04274
DMTA_M31 0.04659
DMTA_sink 0.79138
```

Estimated disappearance times:

|      | DT50    | DT90    |
|------|---------|---------|
| DMTA | 23.26   | 77.27   |
| M23  | 59.94   | 199.11  |
| M27  | 1035.73 | 3440.62 |
| M31  | 70.09   | 232.82  |

Data:

time variable observed predicted residual

|     |      |      |        |          |
|-----|------|------|--------|----------|
| 0   | DMTA | 95.8 | 95.418 | 0.38211  |
| 0   | DMTA | 98.7 | 95.418 | 3.28211  |
| 14  | DMTA | 60.5 | 62.869 | -2.36916 |
| 30  | DMTA | 39.1 | 39.027 | 0.07339  |
| 59  | DMTA | 15.2 | 16.445 | -1.24501 |
| 120 | DMTA | 4.8  | 2.670  | 2.12974  |
| 120 | DMTA | 4.6  | 2.670  | 1.92974  |
| 14  | M23  | 4.1  | 3.564  | 0.53562  |
| 30  | M23  | 5.3  | 5.540  | -0.23968 |
| 59  | M23  | 6.0  | 6.196  | -0.19551 |
| 120 | M23  | 4.3  | 4.123  | 0.17732  |
| 120 | M23  | 4.1  | 4.123  | -0.02268 |
| 14  | M27  | 1.5  | 1.384  | 0.11583  |
| 30  | M27  | 2.4  | 2.383  | 0.01742  |
| 59  | M27  | 3.2  | 3.291  | -0.09129 |
| 120 | M27  | 3.8  | 3.733  | 0.06688  |
| 120 | M27  | 3.7  | 3.733  | -0.03312 |
| 14  | M31  | 2.0  | 1.410  | 0.59050  |
| 30  | M31  | 2.1  | 2.224  | -0.12430 |
| 59  | M31  | 2.2  | 2.566  | -0.36587 |
| 120 | M31  | 1.8  | 1.845  | -0.04469 |
| 120 | M31  | 2.1  | 1.845  | 0.25531  |

**Listing 41:** SFO-SFO3 fit to Flaach data, constant variance

```

mkin version used for fitting: 1.0.4.9000
R version used for fitting: 4.1.0
Date of fit: Mon Jul 26 14:04:04 2021
Date of summary: Mon Jul 26 18:52:53 2021

Equations:
d_DMTA/dt = - k_DMTA * DMTA
d_M23/dt = + f_DMTA_to_M23 * k_DMTA * DMTA - k_M23 * M23
d_M27/dt = + f_DMTA_to_M27 * k_DMTA * DMTA - k_M27 * M27
d_M31/dt = + f_DMTA_to_M31 * k_DMTA * DMTA - k_M31 * M31

Model predictions using solution type deSolve

Fitted using 1134 model solutions performed in 2.221 s

Error model: Constant variance

Error model algorithm: OLS

Starting values for parameters to be optimised:
      value  type
DMTA_0    96.76667 state
k_DMTA     0.10000 deparm
k_M23      0.10010 deparm
k_M27      0.10020 deparm
k_M31      0.10030 deparm
f_DMTA_to_M23 0.25000 deparm
f_DMTA_to_M27 0.25000 deparm
f_DMTA_to_M31 0.25000 deparm

Starting values for the transformed parameters actually optimised:
      value lower upper
DMTA_0    96.76667 -Inf  Inf
log_k_DMTA -2.302585 -Inf  Inf
log_k_M23  -2.301586 -Inf  Inf
log_k_M27  -2.300587 -Inf  Inf
log_k_M31  -2.299590 -Inf  Inf
f_DMTA_ilr_1 0.000000 -Inf  Inf
f_DMTA_ilr_2 0.000000 -Inf  Inf
f_DMTA_ilr_3 0.000000 -Inf  Inf

Fixed parameter values:
      value  type
M23_0     0 state
M27_0     0 state
M31_0     0 state

Results:
      AIC      BIC    logLik
318.3399 344.4874 -150.1699

Optimised, transformed parameters with symmetric confidence intervals:
      Estimate Std. Error Lower Upper
DMTA_0    95.10000    0.298400 94.5000 95.69000
log_k_DMTA -1.93700    0.008114 -1.9530 -1.92100
log_k_M23  -3.07500    0.071240 -3.2160 -2.93400
log_k_M27  -3.67900    0.066370 -3.8110 -3.54800
log_k_M31  -3.52500    0.200100 -3.9210 -3.12900
f_DMTA_ilr_1 -0.03117    0.038850 -0.1081  0.04571
f_DMTA_ilr_2  0.92120    0.090880  0.7413  1.10100
f_DMTA_ilr_3 -1.76600    0.045220 -1.8550 -1.67600
sigma       0.73600    0.044790  0.6473  0.82460

Parameter correlation:

```



|              | DMTA_0       | log_k_DMTA   | log_k_M23    | log_k_M27  | log_k_M31  |
|--------------|--------------|--------------|--------------|------------|------------|
| DMTA_0       | 1.000e+00    | 5.286e-01    | -4.613e-02   | -4.994e-02 | -1.663e-02 |
| log_k_DMTA   | 5.286e-01    | 1.000e+00    | -8.728e-02   | -9.447e-02 | -3.146e-02 |
| log_k_M23    | -4.613e-02   | -8.728e-02   | 1.000e+00    | 8.245e-03  | 2.746e-03  |
| log_k_M27    | -4.994e-02   | -9.447e-02   | 8.245e-03    | 1.000e+00  | 2.972e-03  |
| log_k_M31    | -1.663e-02   | -3.146e-02   | 2.746e-03    | 2.972e-03  | 1.000e+00  |
| f_DMTA_ilr_1 | -9.573e-03   | -1.811e-02   | 6.089e-01    | -4.563e-01 | 5.698e-04  |
| f_DMTA_ilr_2 | -6.684e-04   | -1.265e-03   | 1.500e-01    | 1.132e-01  | -7.314e-01 |
| f_DMTA_ilr_3 | -1.516e-01   | -1.687e-01   | 3.463e-01    | 2.700e-01  | 6.207e-01  |
| sigma        | -5.360e-07   | -2.134e-06   | -9.505e-08   | 7.486e-07  | 2.692e-07  |
|              | f_DMTA_ilr_1 | f_DMTA_ilr_2 | f_DMTA_ilr_3 | sigma      |            |
| DMTA_0       | -9.573e-03   | -6.684e-04   | -1.516e-01   | -5.360e-07 |            |
| log_k_DMTA   | -1.811e-02   | -1.265e-03   | -1.687e-01   | -2.134e-06 |            |
| log_k_M23    | 6.089e-01    | 1.500e-01    | 3.463e-01    | -9.505e-08 |            |
| log_k_M27    | -4.563e-01   | 1.132e-01    | 2.700e-01    | 7.486e-07  |            |
| log_k_M31    | 5.698e-04    | -7.314e-01   | 6.207e-01    | 2.692e-07  |            |
| f_DMTA_ilr_1 | 1.000e+00    | 6.975e-02    | 1.541e-01    | -7.243e-08 |            |
| f_DMTA_ilr_2 | 6.975e-02    | 1.000e+00    | -6.544e-01   | 2.784e-07  |            |
| f_DMTA_ilr_3 | 1.541e-01    | -6.544e-01   | 1.000e+00    | 6.106e-07  |            |
| sigma        | -7.243e-08   | 2.784e-07    | 6.106e-07    | 1.000e+00  |            |

Backtransformed parameters:

Confidence intervals for internally transformed parameters are asymmetric.  
t-test (unrealistically) based on the assumption of normal distribution  
for estimators of untransformed parameters.

|               | Estimate | t value | Pr(>t)     | Lower    | Upper    |
|---------------|----------|---------|------------|----------|----------|
| DMTA_0        | 95.10000 | 318.700 | 2.598e-185 | 94.50000 | 95.69000 |
| k_DMTA        | 0.14410  | 123.200 | 1.642e-133 | 0.14180  | 0.14650  |
| k_M23         | 0.04618  | 14.040  | 7.890e-28  | 0.04010  | 0.05317  |
| k_M27         | 0.02524  | 15.070  | 2.864e-30  | 0.02213  | 0.02878  |
| k_M31         | 0.02945  | 4.998   | 9.487e-07  | 0.01982  | 0.04376  |
| f_DMTA_to_M23 | 0.12870  | 22.440  | 3.901e-46  | NA       | NA       |
| f_DMTA_to_M27 | 0.13450  | 29.860  | 2.659e-59  | NA       | NA       |
| f_DMTA_to_M31 | 0.04259  | 9.253   | 3.582e-16  | NA       | NA       |
| sigma         | 0.73600  | 16.430  | 1.995e-33  | 0.64730  | 0.82460  |

FOCUS Chi2 error levels in percent:

|          | err.min | n.optim | df |
|----------|---------|---------|----|
| All data | 4.706   | 8       | 37 |
| DMTA     | 2.110   | 2       | 10 |
| M23      | 11.577  | 2       | 9  |
| M27      | 4.462   | 2       | 9  |
| M31      | 19.485  | 2       | 9  |

Resulting formation fractions:

|           | ff      |
|-----------|---------|
| DMTA_M23  | 0.12873 |
| DMTA_M27  | 0.13453 |
| DMTA_M31  | 0.04259 |
| DMTA_sink | 0.69415 |

Estimated disappearance times:

|      | DT50   | DT90  |
|------|--------|-------|
| DMTA | 4.809  | 15.98 |
| M23  | 15.011 | 49.86 |
| M27  | 27.467 | 91.24 |
| M31  | 23.537 | 78.19 |

Data:

|        | time | variable | observed | predicted | residual  |
|--------|------|----------|----------|-----------|-----------|
| 0.0000 |      | DMTA     | 96.5     | 95.095291 | 1.404709  |
| 0.0000 |      | DMTA     | 96.8     | 95.095291 | 1.704709  |
| 0.0000 |      | DMTA     | 97.0     | 95.095291 | 1.904709  |
| 0.6234 |      | DMTA     | 82.9     | 86.924158 | -4.024158 |
| 0.6234 |      | DMTA     | 86.7     | 86.924158 | -0.224158 |
| 0.6234 |      | DMTA     | 87.4     | 86.924158 | 0.475842  |
| 1.8702 |      | DMTA     | 72.8     | 72.627894 | 0.172106  |
| 1.8702 |      | DMTA     | 69.9     | 72.627894 | -2.727894 |
| 1.8702 |      | DMTA     | 71.9     | 72.627894 | -0.727894 |

|         |      |      |           |           |
|---------|------|------|-----------|-----------|
| 4.3637  | DMTA | 51.4 | 50.702499 | 0.697501  |
| 4.3637  | DMTA | 52.9 | 50.702499 | 2.197501  |
| 4.3637  | DMTA | 48.6 | 50.702499 | -2.102499 |
| 8.7274  | DMTA | 28.5 | 27.033340 | 1.466660  |
| 8.7274  | DMTA | 27.3 | 27.033340 | 0.266660  |
| 8.7274  | DMTA | 27.5 | 27.033340 | 0.466660  |
| 13.0911 | DMTA | 14.8 | 14.413520 | 0.386480  |
| 13.0911 | DMTA | 13.4 | 14.413520 | -1.013520 |
| 13.0911 | DMTA | 14.4 | 14.413520 | -0.013520 |
| 17.4548 | DMTA | 7.7  | 7.684939  | 0.015061  |
| 17.4548 | DMTA | 7.3  | 7.684939  | -0.384939 |
| 17.4548 | DMTA | 8.1  | 7.684939  | 0.415061  |
| 26.1822 | DMTA | 2.0  | 2.184646  | -0.184646 |
| 26.1822 | DMTA | 1.5  | 2.184646  | -0.684646 |
| 26.1822 | DMTA | 1.9  | 2.184646  | -0.284646 |
| 34.9096 | DMTA | 1.3  | 0.621043  | 0.678957  |
| 34.9096 | DMTA | 1.0  | 0.621043  | 0.378957  |
| 34.9096 | DMTA | 1.1  | 0.621043  | 0.478957  |
| 43.6370 | DMTA | 0.9  | 0.176548  | 0.723452  |
| 43.6370 | DMTA | 0.7  | 0.176548  | 0.523452  |
| 43.6370 | DMTA | 0.7  | 0.176548  | 0.523452  |
| 52.3644 | DMTA | 0.6  | 0.050188  | 0.549812  |
| 52.3644 | DMTA | 0.4  | 0.050188  | 0.349812  |
| 52.3644 | DMTA | 0.5  | 0.050188  | 0.449812  |
| 74.8063 | DMTA | 0.4  | 0.001977  | 0.398023  |
| 74.8063 | DMTA | 0.3  | 0.001977  | 0.298023  |
| 74.8063 | DMTA | 0.3  | 0.001977  | 0.298023  |
| 0.6234  | M23  | 0.7  | 1.036647  | -0.336647 |
| 0.6234  | M23  | 0.7  | 1.036647  | -0.336647 |
| 0.6234  | M23  | 0.2  | 1.036647  | -0.836647 |
| 1.8702  | M23  | 2.2  | 2.765487  | -0.565487 |
| 1.8702  | M23  | 1.8  | 2.765487  | -0.965487 |
| 1.8702  | M23  | 1.6  | 2.765487  | -1.165487 |
| 4.3637  | M23  | 4.1  | 5.121553  | -1.021553 |
| 4.3637  | M23  | 4.2  | 5.121553  | -0.921553 |
| 4.3637  | M23  | 4.2  | 5.121553  | -0.921553 |
| 8.7274  | M23  | 7.5  | 6.917563  | 0.582437  |
| 8.7274  | M23  | 7.1  | 6.917563  | 0.182437  |
| 8.7274  | M23  | 7.5  | 6.917563  | 0.582437  |
| 13.0911 | M23  | 8.4  | 7.111053  | 1.288947  |
| 13.0911 | M23  | 6.8  | 7.111053  | -0.311053 |
| 13.0911 | M23  | 8.0  | 7.111053  | 0.888947  |
| 17.4548 | M23  | 7.2  | 6.589565  | 0.610435  |
| 17.4548 | M23  | 7.2  | 6.589565  | 0.610435  |
| 17.4548 | M23  | 6.9  | 6.589565  | 0.310435  |
| 26.1822 | M23  | 4.9  | 4.962891  | -0.062891 |
| 26.1822 | M23  | 4.3  | 4.962891  | -0.662891 |
| 26.1822 | M23  | 4.5  | 4.962891  | -0.462891 |
| 34.9096 | M23  | 3.8  | 3.475660  | 0.324340  |
| 34.9096 | M23  | 3.1  | 3.475660  | -0.375660 |
| 34.9096 | M23  | 3.1  | 3.475660  | -0.375660 |
| 43.6370 | M23  | 2.7  | 2.367990  | 0.332010  |
| 43.6370 | M23  | 2.3  | 2.367990  | -0.067990 |
| 43.6370 | M23  | 2.1  | 2.367990  | -0.267990 |
| 52.3644 | M23  | 1.6  | 1.595390  | 0.004610  |
| 52.3644 | M23  | 1.1  | 1.595390  | -0.495390 |
| 52.3644 | M23  | 1.3  | 1.595390  | -0.295390 |
| 74.8063 | M23  | 0.4  | 0.568986  | -0.168986 |
| 74.8063 | M23  | 0.4  | 0.568986  | -0.168986 |
| 74.8063 | M23  | 0.3  | 0.568986  | -0.268986 |
| 0.6234  | M27  | 1.1  | 1.090548  | 0.009452  |
| 0.6234  | M27  | 1.1  | 1.090548  | 0.009452  |
| 0.6234  | M27  | 0.3  | 1.090548  | -0.790548 |
| 1.8702  | M27  | 2.6  | 2.949240  | -0.349240 |
| 1.8702  | M27  | 2.4  | 2.949240  | -0.549240 |
| 1.8702  | M27  | 2.3  | 2.949240  | -0.649240 |
| 4.3637  | M27  | 5.0  | 5.622774  | -0.622774 |
| 4.3637  | M27  | 5.9  | 5.622774  | 0.272726  |
| 4.3637  | M27  | 4.8  | 5.622774  | -0.822774 |

|         |     |     |          |           |
|---------|-----|-----|----------|-----------|
| 8.7274  | M27 | 8.5 | 8.034385 | 0.465615  |
| 8.7274  | M27 | 8.5 | 8.034385 | 0.465615  |
| 8.7274  | M27 | 8.3 | 8.034385 | 0.265615  |
| 13.0911 | M27 | 9.3 | 8.795020 | 0.504980  |
| 13.0911 | M27 | 8.7 | 8.795020 | -0.095020 |
| 13.0911 | M27 | 9.1 | 8.795020 | 0.304980  |
| 17.4548 | M27 | 8.6 | 8.730158 | -0.130158 |
| 17.4548 | M27 | 8.5 | 8.730158 | -0.230158 |
| 17.4548 | M27 | 8.9 | 8.730158 | 0.169842  |
| 26.1822 | M27 | 8.1 | 7.653691 | 0.446309  |
| 26.1822 | M27 | 7.7 | 7.653691 | 0.046309  |
| 26.1822 | M27 | 7.4 | 7.653691 | -0.253691 |
| 34.9096 | M27 | 5.9 | 6.325309 | -0.425309 |
| 34.9096 | M27 | 6.0 | 6.325309 | -0.325309 |
| 34.9096 | M27 | 5.9 | 6.325309 | -0.425309 |
| 43.6370 | M27 | 5.6 | 5.127412 | 0.472588  |
| 43.6370 | M27 | 5.2 | 5.127412 | 0.072588  |
| 43.6370 | M27 | 5.6 | 5.127412 | 0.472588  |
| 52.3644 | M27 | 4.3 | 4.128757 | 0.171243  |
| 52.3644 | M27 | 3.7 | 4.128757 | -0.428757 |
| 52.3644 | M27 | 3.9 | 4.128757 | -0.228757 |
| 74.8063 | M27 | 2.5 | 2.347799 | 0.152201  |
| 74.8063 | M27 | 2.4 | 2.347799 | 0.052201  |
| 74.8063 | M27 | 2.2 | 2.347799 | -0.147799 |
| 0.6234  | M31 | 0.3 | 0.344759 | -0.044759 |
| 0.6234  | M31 | 0.3 | 0.344759 | -0.044759 |
| 0.6234  | M31 | 0.1 | 0.344759 | -0.244759 |
| 1.8702  | M31 | 0.7 | 0.929790 | -0.229790 |
| 1.8702  | M31 | 0.6 | 0.929790 | -0.329790 |
| 1.8702  | M31 | 0.7 | 0.929790 | -0.229790 |
| 4.3637  | M31 | 1.3 | 1.762253 | -0.462253 |
| 4.3637  | M31 | 1.2 | 1.762253 | -0.562253 |
| 4.3637  | M31 | 1.4 | 1.762253 | -0.362253 |
| 8.7274  | M31 | 2.4 | 2.489326 | -0.089326 |
| 8.7274  | M31 | 2.1 | 2.489326 | -0.389326 |
| 8.7274  | M31 | 2.3 | 2.489326 | -0.189326 |
| 13.0911 | M31 | 3.3 | 2.690095 | 0.609905  |
| 13.0911 | M31 | 2.4 | 2.690095 | -0.290095 |
| 13.0911 | M31 | 2.6 | 2.690095 | -0.090095 |
| 17.4548 | M31 | 4.0 | 2.632789 | 1.367211  |
| 17.4548 | M31 | 3.6 | 2.632789 | 0.967211  |
| 17.4548 | M31 | 3.3 | 2.632789 | 0.667211  |
| 26.1822 | M31 | 2.1 | 2.237249 | -0.137249 |
| 26.1822 | M31 | 1.7 | 2.237249 | -0.537249 |
| 26.1822 | M31 | 1.8 | 2.237249 | -0.437249 |
| 34.9096 | M31 | 1.6 | 1.787375 | -0.187375 |
| 34.9096 | M31 | 1.6 | 1.787375 | -0.187375 |
| 34.9096 | M31 | 1.4 | 1.787375 | -0.387375 |
| 43.6370 | M31 | 1.8 | 1.398532 | 0.401468  |
| 43.6370 | M31 | 1.5 | 1.398532 | 0.101468  |
| 43.6370 | M31 | 1.3 | 1.398532 | -0.098532 |
| 52.3644 | M31 | 1.2 | 1.086183 | 0.113817  |
| 52.3644 | M31 | 0.9 | 1.086183 | -0.186183 |
| 52.3644 | M31 | 1.1 | 1.086183 | 0.013817  |
| 74.8063 | M31 | 0.5 | 0.562170 | -0.062170 |
| 74.8063 | M31 | 0.5 | 0.562170 | -0.062170 |
| 74.8063 | M31 | 0.3 | 0.562170 | -0.262170 |

**Listing 42:** SFO-SFO3 fit to Flaach data, two-component error

```

mkin version used for fitting: 1.0.4.9000
R version used for fitting: 4.1.0
Date of fit: Mon Jul 26 14:04:52 2021
Date of summary: Mon Jul 26 18:52:53 2021

Equations:
d_DMTA/dt = - k_DMTA * DMTA
d_M23/dt = + f_DMTA_to_M23 * k_DMTA * DMTA - k_M23 * M23
d_M27/dt = + f_DMTA_to_M27 * k_DMTA * DMTA - k_M27 * M27
d_M31/dt = + f_DMTA_to_M31 * k_DMTA * DMTA - k_M31 * M31

Model predictions using solution type deSolve

Fitted using 6699 model solutions performed in 13.02 s

Error model: Two-component variance function

Error model algorithm: d_3
Three-step fitting yielded a higher likelihood than direct fitting

Starting values for parameters to be optimised:
      value  type
DMTA_0    96.76667 state
k_DMTA     0.10000 deparm
k_M23      0.10010 deparm
k_M27      0.10020 deparm
k_M31      0.10030 deparm
f_DMTA_to_M23 0.25000 deparm
f_DMTA_to_M27 0.25000 deparm
f_DMTA_to_M31 0.25000 deparm
sigma_low  0.10000 error
rsd_high   0.10000 error

Starting values for the transformed parameters actually optimised:
      value lower upper
DMTA_0    96.76667 -Inf  Inf
log_k_DMTA -2.302585 -Inf  Inf
log_k_M23  -2.301586 -Inf  Inf
log_k_M27  -2.300587 -Inf  Inf
log_k_M31  -2.299590 -Inf  Inf
f_DMTA_ilr_1 0.000000 -Inf  Inf
f_DMTA_ilr_2 0.000000 -Inf  Inf
f_DMTA_ilr_3 0.000000 -Inf  Inf
sigma_low   0.100000  0    Inf
rsd_high    0.100000  0    Inf

Fixed parameter values:
      value  type
M23_0     0 state
M27_0     0 state
M31_0     0 state

Warning(s):
Optimisation did not converge:
iteration limit reached without convergence (10)

Results:
      AIC      BIC  logLik
242.378 271.4308 -111.189

Optimised, transformed parameters with symmetric confidence intervals:
      Estimate Std. Error  Lower  Upper
DMTA_0    94.81000    0.827100 93.17000 96.44000

```

```

log_k_DMTA    -1.94400    0.009534 -1.96300 -1.92500
log_k_M23     -3.07000    0.046680 -3.16300 -2.97800
log_k_M27     -3.67800    0.044130 -3.76500 -3.59000
log_k_M31     -3.52000    0.127000 -3.77100 -3.26800
f_DMTA_ilr_1  -0.03082    0.025970 -0.08222  0.02058
f_DMTA_ilr_2   0.91910    0.058100  0.80410  1.03400
f_DMTA_ilr_3  -1.76000    0.032920 -1.82500 -1.69500
sigma_low     0.46500    0.032860  0.39990  0.53000
rsd_high      0.02576    0.005443  0.01499  0.03653

```

## Parameter correlation:

```

          DMTA_0 log_k_DMTA log_k_M23 log_k_M27 log_k_M31 f_DMTA_ilr_1
DMTA_0      1.000e+00    0.646374 -0.099605 -0.103921 -0.037626   -0.019227
log_k_DMTA   6.464e-01    1.000000 -0.154901 -0.164913 -0.058199   -0.030508
log_k_M23   -9.961e-02    -0.154901    1.000000  0.025809  0.009014    0.601197
log_k_M27   -1.039e-01    -0.164913    0.025809    1.000000  0.009594   -0.452633
log_k_M31   -3.763e-02    -0.058199    0.009014    0.009594    1.000000    0.001775
f_DMTA_ilr_1 -1.923e-02    -0.030508    0.601197   -0.452633  0.001775    1.000000
f_DMTA_ilr_2  2.147e-06    -0.002129    0.154396    0.119230  -0.728710    0.067554
f_DMTA_ilr_3 -4.568e-01    -0.413149    0.363714    0.302509  0.563190    0.140868
sigma_low    3.595e-02    0.008066    0.002907    0.017516  -0.000633    0.003471
rsd_high    -7.918e-02    -0.011310   -0.004962   -0.033247  0.000735   -0.006067

          f_DMTA_ilr_2 f_DMTA_ilr_3 sigma_low  rsd_high
DMTA_0      2.147e-06   -0.456753  0.035950  -0.079178
log_k_DMTA  -2.129e-03   -0.413149  0.008066  -0.011310
log_k_M23    1.544e-01    0.363714  0.002907  -0.004962
log_k_M27    1.192e-01    0.302509  0.017516  -0.033247
log_k_M31   -7.287e-01    0.563190  -0.000633  0.000735
f_DMTA_ilr_1  6.755e-02    0.140868  0.003471  -0.006067
f_DMTA_ilr_2  1.000e+00   -0.558736  0.010102  -0.017982
f_DMTA_ilr_3 -5.587e-01    1.000000  0.005647  -0.013490
sigma_low    1.010e-02    0.005647  1.000000  -0.238404
rsd_high    -1.798e-02   -0.013490  -0.238404  1.000000

```

## Backtransformed parameters:

Confidence intervals for internally transformed parameters are asymmetric.  
t-test (unrealistically) based on the assumption of normal distribution  
for estimators of untransformed parameters.

|               | Estimate | t value | Pr(>t)     | Lower    | Upper    |
|---------------|----------|---------|------------|----------|----------|
| DMTA_0        | 94.81000 | 114.600 | 8.799e-129 | 93.17000 | 96.44000 |
| k_DMTA        | 0.14310  | 104.900 | 5.186e-124 | 0.14040  | 0.14580  |
| k_M23         | 0.04641  | 21.420  | 5.839e-44  | 0.04232  | 0.05090  |
| k_M27         | 0.02528  | 22.660  | 2.135e-46  | 0.02317  | 0.02759  |
| k_M31         | 0.02961  | 7.873   | 7.158e-13  | 0.02303  | 0.03808  |
| f_DMTA_to_M23 | 0.12920  | 31.210  | 3.745e-61  | NA       | NA       |
| f_DMTA_to_M27 | 0.13500  | 39.230  | 1.992e-72  | NA       | NA       |
| f_DMTA_to_M31 | 0.04286  | 14.310  | 2.091e-28  | NA       | NA       |
| sigma_low     | 0.46500  | 14.150  | 4.957e-28  | 0.39990  | 0.53000  |
| rsd_high      | 0.02576  | 4.733   | 2.941e-06  | 0.01499  | 0.03653  |

## FOCUS Chi2 error levels in percent:

|          | err.min | n.optim | df |
|----------|---------|---------|----|
| All data | 4.744   | 8       | 37 |
| DMTA     | 2.148   | 2       | 10 |
| M23      | 11.512  | 2       | 9  |
| M27      | 4.436   | 2       | 9  |
| M31      | 19.435  | 2       | 9  |

## Resulting formation fractions:

```

ff
DMTA_M23  0.12924
DMTA_M27  0.13500
DMTA_M31  0.04286
DMTA_sink 0.69290

```

## Estimated disappearance times:

```

DT50  DT90
DMTA  4.845 16.09
M23   14.935 49.61

```

M27 27.415 91.07  
M31 23.407 77.76

Data:

| time    | variable | observed | predicted | residual |
|---------|----------|----------|-----------|----------|
| 0.0000  | DMTA     | 96.5     | 94.805075 | 1.69492  |
| 0.0000  | DMTA     | 96.8     | 94.805075 | 1.99492  |
| 0.0000  | DMTA     | 97.0     | 94.805075 | 2.19492  |
| 0.6234  | DMTA     | 82.9     | 86.715317 | -3.81532 |
| 0.6234  | DMTA     | 86.7     | 86.715317 | -0.01532 |
| 0.6234  | DMTA     | 87.4     | 86.715317 | 0.68468  |
| 1.8702  | DMTA     | 72.8     | 72.547805 | 0.25219  |
| 1.8702  | DMTA     | 69.9     | 72.547805 | -2.64781 |
| 1.8702  | DMTA     | 71.9     | 72.547805 | -0.64781 |
| 4.3637  | DMTA     | 51.4     | 50.778656 | 0.62134  |
| 4.3637  | DMTA     | 52.9     | 50.778656 | 2.12134  |
| 4.3637  | DMTA     | 48.6     | 50.778656 | -2.17866 |
| 8.7274  | DMTA     | 28.5     | 27.197615 | 1.30239  |
| 8.7274  | DMTA     | 27.3     | 27.197615 | 0.10239  |
| 8.7274  | DMTA     | 27.5     | 27.197615 | 0.30239  |
| 13.0911 | DMTA     | 14.8     | 14.567346 | 0.23265  |
| 13.0911 | DMTA     | 13.4     | 14.567346 | -1.16735 |
| 13.0911 | DMTA     | 14.4     | 14.567346 | -0.16735 |
| 17.4548 | DMTA     | 7.7      | 7.802433  | -0.10243 |
| 17.4548 | DMTA     | 7.3      | 7.802433  | -0.50243 |
| 17.4548 | DMTA     | 8.1      | 7.802433  | 0.29757  |
| 26.1822 | DMTA     | 2.0      | 2.238357  | -0.23836 |
| 26.1822 | DMTA     | 1.5      | 2.238357  | -0.73836 |
| 26.1822 | DMTA     | 1.9      | 2.238357  | -0.33836 |
| 34.9096 | DMTA     | 1.3      | 0.642138  | 0.65786  |
| 34.9096 | DMTA     | 1.0      | 0.642138  | 0.35786  |
| 34.9096 | DMTA     | 1.1      | 0.642138  | 0.45786  |
| 43.6370 | DMTA     | 0.9      | 0.184216  | 0.71578  |
| 43.6370 | DMTA     | 0.7      | 0.184216  | 0.51578  |
| 43.6370 | DMTA     | 0.7      | 0.184216  | 0.51578  |
| 52.3644 | DMTA     | 0.6      | 0.052848  | 0.54715  |
| 52.3644 | DMTA     | 0.4      | 0.052848  | 0.34715  |
| 52.3644 | DMTA     | 0.5      | 0.052848  | 0.44715  |
| 74.8063 | DMTA     | 0.4      | 0.002131  | 0.39787  |
| 74.8063 | DMTA     | 0.3      | 0.002131  | 0.29787  |
| 74.8063 | DMTA     | 0.3      | 0.002131  | 0.29787  |
| 0.6234  | M23      | 0.7      | 1.030332  | -0.33033 |
| 0.6234  | M23      | 0.7      | 1.030332  | -0.33033 |
| 0.6234  | M23      | 0.2      | 1.030332  | -0.83033 |
| 1.8702  | M23      | 2.2      | 2.749938  | -0.54994 |
| 1.8702  | M23      | 1.8      | 2.749938  | -0.94994 |
| 1.8702  | M23      | 1.6      | 2.749938  | -1.14994 |
| 4.3637  | M23      | 4.1      | 5.097077  | -0.99708 |
| 4.3637  | M23      | 4.2      | 5.097077  | -0.89708 |
| 4.3637  | M23      | 4.2      | 5.097077  | -0.89708 |
| 8.7274  | M23      | 7.5      | 6.892645  | 0.60736  |
| 8.7274  | M23      | 7.1      | 6.892645  | 0.20736  |
| 8.7274  | M23      | 7.5      | 6.892645  | 0.60736  |
| 13.0911 | M23      | 8.4      | 7.091212  | 1.30879  |
| 13.0911 | M23      | 6.8      | 7.091212  | -0.29121 |
| 13.0911 | M23      | 8.0      | 7.091212  | 0.90879  |
| 17.4548 | M23      | 7.2      | 6.574324  | 0.62568  |
| 17.4548 | M23      | 7.2      | 6.574324  | 0.62568  |
| 17.4548 | M23      | 6.9      | 6.574324  | 0.32568  |
| 26.1822 | M23      | 4.9      | 4.951930  | -0.05193 |
| 26.1822 | M23      | 4.3      | 4.951930  | -0.65193 |
| 26.1822 | M23      | 4.5      | 4.951930  | -0.45193 |
| 34.9096 | M23      | 3.8      | 3.465366  | 0.33463  |
| 34.9096 | M23      | 3.1      | 3.465366  | -0.36537 |
| 34.9096 | M23      | 3.1      | 3.465366  | -0.36537 |
| 43.6370 | M23      | 2.7      | 2.357870  | 0.34213  |
| 43.6370 | M23      | 2.3      | 2.357870  | -0.05787 |
| 43.6370 | M23      | 2.1      | 2.357870  | -0.25787 |
| 52.3644 | M23      | 1.6      | 1.585946  | 0.01405  |

|         |     |     |          |          |
|---------|-----|-----|----------|----------|
| 52.3644 | M23 | 1.1 | 1.585946 | -0.48595 |
| 52.3644 | M23 | 1.3 | 1.585946 | -0.28595 |
| 74.8063 | M23 | 0.4 | 0.562836 | -0.16284 |
| 74.8063 | M23 | 0.4 | 0.562836 | -0.16284 |
| 74.8063 | M23 | 0.3 | 0.562836 | -0.26284 |
| 0.6234  | M27 | 1.1 | 1.083425 | 0.01658  |
| 0.6234  | M27 | 1.1 | 1.083425 | 0.01658  |
| 0.6234  | M27 | 0.3 | 1.083425 | -0.78342 |
| 1.8702  | M27 | 2.6 | 2.931700 | -0.33170 |
| 1.8702  | M27 | 2.4 | 2.931700 | -0.53170 |
| 1.8702  | M27 | 2.3 | 2.931700 | -0.63170 |
| 4.3637  | M27 | 5.0 | 5.595354 | -0.59535 |
| 4.3637  | M27 | 5.9 | 5.595354 | 0.30465  |
| 4.3637  | M27 | 4.8 | 5.595354 | -0.79535 |
| 8.7274  | M27 | 8.5 | 8.007798 | 0.49220  |
| 8.7274  | M27 | 8.5 | 8.007798 | 0.49220  |
| 8.7274  | M27 | 8.3 | 8.007798 | 0.29220  |
| 13.0911 | M27 | 9.3 | 8.776495 | 0.52350  |
| 13.0911 | M27 | 8.7 | 8.776495 | -0.07650 |
| 13.0911 | M27 | 9.1 | 8.776495 | 0.32350  |
| 17.4548 | M27 | 8.6 | 8.719462 | -0.11946 |
| 17.4548 | M27 | 8.5 | 8.719462 | -0.21946 |
| 17.4548 | M27 | 8.9 | 8.719462 | 0.18054  |
| 26.1822 | M27 | 8.1 | 7.651978 | 0.44802  |
| 26.1822 | M27 | 7.7 | 7.651978 | 0.04802  |
| 26.1822 | M27 | 7.4 | 7.651978 | -0.25198 |
| 34.9096 | M27 | 5.9 | 6.325890 | -0.42589 |
| 34.9096 | M27 | 6.0 | 6.325890 | -0.32589 |
| 34.9096 | M27 | 5.9 | 6.325890 | -0.42589 |
| 43.6370 | M27 | 5.6 | 5.127552 | 0.47245  |
| 43.6370 | M27 | 5.2 | 5.127552 | 0.07245  |
| 43.6370 | M27 | 5.6 | 5.127552 | 0.47245  |
| 52.3644 | M27 | 4.3 | 4.127815 | 0.17218  |
| 52.3644 | M27 | 3.7 | 4.127815 | -0.42782 |
| 52.3644 | M27 | 3.9 | 4.127815 | -0.22782 |
| 74.8063 | M27 | 2.5 | 2.345019 | 0.15498  |
| 74.8063 | M27 | 2.4 | 2.345019 | 0.05498  |
| 74.8063 | M27 | 2.2 | 2.345019 | -0.14502 |
| 0.6234  | M31 | 0.3 | 0.343465 | -0.04347 |
| 0.6234  | M31 | 0.3 | 0.343465 | -0.04347 |
| 0.6234  | M31 | 0.1 | 0.343465 | -0.24347 |
| 1.8702  | M31 | 0.7 | 0.926776 | -0.22678 |
| 1.8702  | M31 | 0.6 | 0.926776 | -0.32678 |
| 1.8702  | M31 | 0.7 | 0.926776 | -0.22678 |
| 4.3637  | M31 | 1.3 | 1.758159 | -0.45816 |
| 4.3637  | M31 | 1.2 | 1.758159 | -0.55816 |
| 4.3637  | M31 | 1.4 | 1.758159 | -0.35816 |
| 8.7274  | M31 | 2.4 | 2.486721 | -0.08672 |
| 8.7274  | M31 | 2.1 | 2.486721 | -0.38672 |
| 8.7274  | M31 | 2.3 | 2.486721 | -0.18672 |
| 13.0911 | M31 | 3.3 | 2.689655 | 0.61035  |
| 13.0911 | M31 | 2.4 | 2.689655 | -0.28965 |
| 13.0911 | M31 | 2.6 | 2.689655 | -0.08965 |
| 17.4548 | M31 | 4.0 | 2.633761 | 1.36624  |
| 17.4548 | M31 | 3.6 | 2.633761 | 0.96624  |
| 17.4548 | M31 | 3.3 | 2.633761 | 0.66624  |
| 26.1822 | M31 | 2.1 | 2.238581 | -0.13858 |
| 26.1822 | M31 | 1.7 | 2.238581 | -0.53858 |
| 26.1822 | M31 | 1.8 | 2.238581 | -0.43858 |
| 34.9096 | M31 | 1.6 | 1.787458 | -0.18746 |
| 34.9096 | M31 | 1.6 | 1.787458 | -0.18746 |
| 34.9096 | M31 | 1.4 | 1.787458 | -0.38746 |
| 43.6370 | M31 | 1.8 | 1.397209 | 0.40279  |
| 43.6370 | M31 | 1.5 | 1.397209 | 0.10279  |
| 43.6370 | M31 | 1.3 | 1.397209 | -0.09721 |
| 52.3644 | M31 | 1.2 | 1.083828 | 0.11617  |
| 52.3644 | M31 | 0.9 | 1.083828 | -0.18383 |
| 52.3644 | M31 | 1.1 | 1.083828 | 0.01617  |
| 74.8063 | M31 | 0.5 | 0.558975 | -0.05898 |

|         |     |     |          |          |
|---------|-----|-----|----------|----------|
| 74.8063 | M31 | 0.5 | 0.558975 | -0.05898 |
| 74.8063 | M31 | 0.3 | 0.558975 | -0.25898 |



**Listing 43:** SFO-SFO3 fit to BBA 2.2 data, constant variance

```

mkin version used for fitting: 1.0.4.9000
R version used for fitting: 4.1.0
Date of fit: Mon Jul 26 14:04:04 2021
Date of summary: Mon Jul 26 18:52:53 2021

Equations:
d_DMTA/dt = - k_DMTA * DMTA
d_M23/dt = + f_DMTA_to_M23 * k_DMTA * DMTA - k_M23 * M23
d_M27/dt = + f_DMTA_to_M27 * k_DMTA * DMTA - k_M27 * M27
d_M31/dt = + f_DMTA_to_M31 * k_DMTA * DMTA - k_M31 * M31

Model predictions using solution type deSolve

Fitted using 1165 model solutions performed in 2.136 s

Error model: Constant variance

Error model algorithm: OLS

Starting values for parameters to be optimised:
      value type
DMTA_0    98.4300 state
k_DMTA     0.1000 deparm
k_M23      0.1001 deparm
k_M27      0.1002 deparm
k_M31      0.1003 deparm
f_DMTA_to_M23 0.2500 deparm
f_DMTA_to_M27 0.2500 deparm
f_DMTA_to_M31 0.2500 deparm

Starting values for the transformed parameters actually optimised:
      value lower upper
DMTA_0    98.430000 -Inf  Inf
log_k_DMTA -2.302585 -Inf  Inf
log_k_M23  -2.301586 -Inf  Inf
log_k_M27  -2.300587 -Inf  Inf
log_k_M31  -2.299590 -Inf  Inf
f_DMTA_ilr_1 0.000000 -Inf  Inf
f_DMTA_ilr_2 0.000000 -Inf  Inf
f_DMTA_ilr_3 0.000000 -Inf  Inf

Fixed parameter values:
      value type
M23_0     0 state
M27_0     0 state
M31_0     0 state

Results:
      AIC      BIC    logLik
291.8813 314.3796 -136.9406

Optimised, transformed parameters with symmetric confidence intervals:
      Estimate Std. Error Lower Upper
DMTA_0    99.70000    0.49720 98.71000 100.7000
log_k_DMTA -2.65300    0.01259 -2.67800 -2.6280
log_k_M23  -3.81500    0.13040 -4.07500 -3.5560
log_k_M27  -4.99400    0.21610 -5.42400 -4.5640
log_k_M31  -4.30000    0.20470 -4.70800 -3.8930
f_DMTA_ilr_1 0.06628    0.06152 -0.05613 0.1887
f_DMTA_ilr_2 0.27520    0.07701 0.12200 0.4284
f_DMTA_ilr_3 -1.41600    0.05696 -1.53000 -1.3030
sigma      1.10800    0.08259 0.94370 1.2720

Parameter correlation:

```

|              | DMTA_0       | log_k_DMTA   | log_k_M23    | log_k_M27  | log_k_M31  |
|--------------|--------------|--------------|--------------|------------|------------|
| DMTA_0       | 1.000e+00    | 5.339e-01    | -5.039e-02   | -5.227e-02 | -3.722e-02 |
| log_k_DMTA   | 5.339e-01    | 1.000e+00    | -9.438e-02   | -9.790e-02 | -6.971e-02 |
| log_k_M23    | -5.039e-02   | -9.438e-02   | 1.000e+00    | 9.240e-03  | 6.579e-03  |
| log_k_M27    | -5.227e-02   | -9.790e-02   | 9.240e-03    | 1.000e+00  | 6.825e-03  |
| log_k_M31    | -3.722e-02   | -6.971e-02   | 6.579e-03    | 6.825e-03  | 1.000e+00  |
| f_DMTA_ilr_1 | -8.543e-03   | -1.600e-02   | 6.402e-01    | -4.984e-01 | 1.116e-03  |
| f_DMTA_ilr_2 | -5.308e-04   | -9.943e-04   | 2.947e-01    | 2.307e-01  | -7.176e-01 |
| f_DMTA_ilr_3 | -2.226e-01   | -2.553e-01   | 4.988e-01    | 3.831e-01  | 5.210e-01  |
| sigma        | 1.475e-08    | 2.849e-08    | 1.275e-08    | -1.846e-08 | 6.835e-09  |
|              | f_DMTA_ilr_1 | f_DMTA_ilr_2 | f_DMTA_ilr_3 | sigma      |            |
| DMTA_0       | -8.543e-03   | -5.308e-04   | -2.226e-01   | 1.475e-08  |            |
| log_k_DMTA   | -1.600e-02   | -9.943e-04   | -2.553e-01   | 2.849e-08  |            |
| log_k_M23    | 6.402e-01    | 2.947e-01    | 4.988e-01    | 1.275e-08  |            |
| log_k_M27    | -4.984e-01   | 2.307e-01    | 3.831e-01    | -1.846e-08 |            |
| log_k_M31    | 1.116e-03    | -7.176e-01   | 5.210e-01    | 6.835e-09  |            |
| f_DMTA_ilr_1 | 1.000e+00    | 1.150e-01    | 1.996e-01    | 1.121e-08  |            |
| f_DMTA_ilr_2 | 1.150e-01    | 1.000e+00    | -2.137e-01   | -2.089e-08 |            |
| f_DMTA_ilr_3 | 1.996e-01    | -2.137e-01   | 1.000e+00    | -9.815e-09 |            |
| sigma        | 1.121e-08    | -2.089e-08   | -9.815e-09   | 1.000e+00  |            |

Backtransformed parameters:

Confidence intervals for internally transformed parameters are asymmetric.  
t-test (unrealistically) based on the assumption of normal distribution  
for estimators of untransformed parameters.

|               | Estimate | t value | Pr(>t)     | Lower     | Upper     |
|---------------|----------|---------|------------|-----------|-----------|
| DMTA_0        | 99.70000 | 200.500 | 2.665e-111 | 98.710000 | 100.70000 |
| k_DMTA        | 0.07046  | 79.440  | 6.506e-79  | 0.068720  | 0.07225   |
| k_M23         | 0.02203  | 7.667   | 1.693e-11  | 0.017000  | 0.02856   |
| k_M27         | 0.00678  | 4.627   | 6.945e-06  | 0.004410  | 0.01042   |
| k_M31         | 0.01356  | 4.885   | 2.565e-06  | 0.009025  | 0.02038   |
| f_DMTA_to_M23 | 0.14350  | 14.330  | 3.252e-24  | NA        | NA        |
| f_DMTA_to_M27 | 0.13070  | 18.390  | 5.875e-31  | NA        | NA        |
| f_DMTA_to_M31 | 0.09775  | 11.840  | 1.169e-19  | NA        | NA        |
| sigma         | 1.10800  | 13.420  | 1.391e-22  | 0.943700  | 1.27200   |

FOCUS Chi2 error levels in percent:

|          | err.min | n.optim | df |
|----------|---------|---------|----|
| All data | 6.859   | 8       | 37 |
| DMTA     | 3.514   | 2       | 10 |
| M23      | 9.336   | 2       | 9  |
| M27      | 10.677  | 2       | 9  |
| M31      | 10.628  | 2       | 9  |

Resulting formation fractions:

|           | ff      |
|-----------|---------|
| DMTA_M23  | 0.14351 |
| DMTA_M27  | 0.13067 |
| DMTA_M31  | 0.09775 |
| DMTA_sink | 0.62807 |

Estimated disappearance times:

|      | DT50    | DT90   |
|------|---------|--------|
| DMTA | 9.837   | 32.68  |
| M23  | 31.459  | 104.50 |
| M27  | 102.236 | 339.62 |
| M31  | 51.106  | 169.77 |

Data:

|         | time | variable | observed | predicted | residual  |
|---------|------|----------|----------|-----------|-----------|
| 0.0000  |      | DMTA     | 98.09    | 99.7020   | -1.611957 |
| 0.0000  |      | DMTA     | 98.77    | 99.7020   | -0.931957 |
| 0.7679  |      | DMTA     | 93.52    | 94.4508   | -0.930788 |
| 0.7679  |      | DMTA     | 92.03    | 94.4508   | -2.420788 |
| 2.3037  |      | DMTA     | 88.39    | 84.7636   | 3.626399  |
| 2.3037  |      | DMTA     | 87.18    | 84.7636   | 2.416399  |
| 5.3752  |      | DMTA     | 69.38    | 68.2680   | 1.112025  |
| 5.3752  |      | DMTA     | 71.06    | 68.2680   | 2.792025  |
| 10.7505 |      | DMTA     | 45.21    | 46.7445   | -1.534483 |

|         |      |       |         |           |
|---------|------|-------|---------|-----------|
| 10.7505 | DMTA | 46.81 | 46.7445 | 0.065517  |
| 16.1257 | DMTA | 30.54 | 32.0069 | -1.466907 |
| 16.1257 | DMTA | 30.07 | 32.0069 | -1.936907 |
| 21.5010 | DMTA | 21.60 | 21.9158 | -0.315786 |
| 21.5010 | DMTA | 20.41 | 21.9158 | -1.505786 |
| 32.2515 | DMTA | 9.10  | 10.2750 | -1.175045 |
| 32.2515 | DMTA | 9.70  | 10.2750 | -0.575045 |
| 43.0020 | DMTA | 6.58  | 4.8174  | 1.762625  |
| 43.0020 | DMTA | 6.31  | 4.8174  | 1.492625  |
| 53.7525 | DMTA | 3.47  | 2.2586  | 1.211412  |
| 53.7525 | DMTA | 3.52  | 2.2586  | 1.261412  |
| 64.5029 | DMTA | 3.40  | 1.0589  | 2.341078  |
| 64.5029 | DMTA | 3.67  | 1.0589  | 2.611078  |
| 91.3792 | DMTA | 1.62  | 0.1594  | 1.460621  |
| 91.3792 | DMTA | 1.62  | 0.1594  | 1.460621  |
| 0.7679  | M23  | 0.36  | 0.7472  | -0.387190 |
| 0.7679  | M23  | 0.40  | 0.7472  | -0.347190 |
| 2.3037  | M23  | 1.03  | 2.0888  | -1.058847 |
| 2.3037  | M23  | 1.07  | 2.0888  | -1.018847 |
| 5.3752  | M23  | 3.60  | 4.2383  | -0.638298 |
| 5.3752  | M23  | 3.66  | 4.2383  | -0.578298 |
| 10.7505 | M23  | 6.97  | 6.6670  | 0.303032  |
| 10.7505 | M23  | 7.22  | 6.6670  | 0.553032  |
| 16.1257 | M23  | 8.65  | 7.9094  | 0.740578  |
| 16.1257 | M23  | 8.38  | 7.9094  | 0.470578  |
| 21.5010 | M23  | 9.10  | 8.3866  | 0.713385  |
| 21.5010 | M23  | 8.63  | 8.3866  | 0.243385  |
| 32.2515 | M23  | 7.63  | 8.0833  | -0.453307 |
| 32.2515 | M23  | 8.01  | 8.0833  | -0.073307 |
| 43.0020 | M23  | 6.40  | 7.0656  | -0.665564 |
| 43.0020 | M23  | 6.35  | 7.0656  | -0.715564 |
| 53.7525 | M23  | 5.35  | 5.8975  | -0.547522 |
| 53.7525 | M23  | 5.06  | 5.8975  | -0.837522 |
| 64.5029 | M23  | 5.14  | 4.8047  | 0.335276  |
| 64.5029 | M23  | 5.91  | 4.8047  | 1.105276  |
| 91.3792 | M23  | 3.35  | 2.7466  | 0.603384  |
| 91.3792 | M23  | 2.87  | 2.7466  | 0.123384  |
| 0.7679  | M27  | 0.42  | 0.6844  | -0.264363 |
| 0.7679  | M27  | 0.47  | 0.6844  | -0.214363 |
| 2.3037  | M27  | 0.71  | 1.9364  | -1.226398 |
| 2.3037  | M27  | 0.82  | 1.9364  | -1.116398 |
| 5.3752  | M27  | 2.19  | 4.0289  | -1.838859 |
| 5.3752  | M27  | 2.28  | 4.0289  | -1.748859 |
| 10.7505 | M27  | 5.45  | 6.6433  | -1.193319 |
| 10.7505 | M27  | 5.19  | 6.6433  | -1.453319 |
| 16.1257 | M27  | 8.81  | 8.2945  | 0.515528  |
| 16.1257 | M27  | 7.93  | 8.2945  | -0.364472 |
| 21.5010 | M27  | 10.25 | 9.2910  | 0.958997  |
| 21.5010 | M27  | 10.77 | 9.2910  | 1.478997  |
| 32.2515 | M27  | 10.89 | 10.0982 | 0.791809  |
| 32.2515 | M27  | 10.85 | 10.0982 | 0.751809  |
| 43.0020 | M27  | 10.41 | 10.0730 | 0.337006  |
| 43.0020 | M27  | 10.35 | 10.0730 | 0.277006  |
| 53.7525 | M27  | 9.92  | 9.6859  | 0.234085  |
| 53.7525 | M27  | 9.42  | 9.6859  | -0.265915 |
| 64.5029 | M27  | 9.15  | 9.1555  | -0.005548 |
| 64.5029 | M27  | 9.25  | 9.1555  | 0.094452  |
| 91.3792 | M27  | 7.14  | 7.7350  | -0.594976 |
| 91.3792 | M27  | 7.13  | 7.7350  | -0.604976 |
| 0.7679  | M31  | 0.36  | 0.5106  | -0.150632 |
| 0.7679  | M31  | 0.33  | 0.5106  | -0.180632 |
| 2.3037  | M31  | 0.55  | 1.4371  | -0.887092 |
| 2.3037  | M31  | 0.64  | 1.4371  | -0.797092 |
| 5.3752  | M31  | 1.94  | 2.9566  | -1.016647 |
| 5.3752  | M31  | 1.62  | 2.9566  | -1.336647 |
| 10.7505 | M31  | 4.22  | 4.7732  | -0.553242 |
| 10.7505 | M31  | 4.37  | 4.7732  | -0.403242 |
| 16.1257 | M31  | 6.31  | 5.8238  | 0.486162  |
| 16.1257 | M31  | 6.85  | 5.8238  | 1.026162  |

|         |     |      |        |           |
|---------|-----|------|--------|-----------|
| 21.5010 | M31 | 7.05 | 6.3635 | 0.686474  |
| 21.5010 | M31 | 6.84 | 6.3635 | 0.476474  |
| 32.2515 | M31 | 6.53 | 6.5494 | -0.019369 |
| 32.2515 | M31 | 7.11 | 6.5494 | 0.560631  |
| 43.0020 | M31 | 6.06 | 6.1527 | -0.092696 |
| 43.0020 | M31 | 6.05 | 6.1527 | -0.102696 |
| 53.7525 | M31 | 5.50 | 5.5486 | -0.048556 |
| 53.7525 | M31 | 5.07 | 5.5486 | -0.478556 |
| 64.5029 | M31 | 4.94 | 4.9039 | 0.036119  |
| 64.5029 | M31 | 4.39 | 4.9039 | -0.513881 |
| 91.3792 | M31 | 3.64 | 3.4756 | 0.164366  |
| 91.3792 | M31 | 3.55 | 3.4756 | 0.074366  |

**Listing 44:** SFO-SFO3 fit to BBA 2.2 data, two-component error

```

mkin version used for fitting: 1.0.4.9000
R version used for fitting: 4.1.0
Date of fit: Mon Jul 26 14:04:45 2021
Date of summary: Mon Jul 26 18:52:53 2021

Equations:
d_DMTA/dt = - k_DMTA * DMTA
d_M23/dt = + f_DMTA_to_M23 * k_DMTA * DMTA - k_M23 * M23
d_M27/dt = + f_DMTA_to_M27 * k_DMTA * DMTA - k_M27 * M27
d_M31/dt = + f_DMTA_to_M31 * k_DMTA * DMTA - k_M31 * M31

Model predictions using solution type deSolve

Fitted using 3290 model solutions performed in 6.253 s

Error model: Two-component variance function

Error model algorithm: d_3
Direct fitting and three-step fitting yield approximately the same likelihood

Starting values for parameters to be optimised:
      value  type
DMTA_0    98.4300 state
k_DMTA      0.1000 deparm
k_M23       0.1001 deparm
k_M27       0.1002 deparm
k_M31       0.1003 deparm
f_DMTA_to_M23 0.2500 deparm
f_DMTA_to_M27 0.2500 deparm
f_DMTA_to_M31 0.2500 deparm
sigma_low   0.1000 error
rsd_high    0.1000 error

Starting values for the transformed parameters actually optimised:
      value lower upper
DMTA_0    98.430000 -Inf  Inf
log_k_DMTA -2.302585 -Inf  Inf
log_k_M23  -2.301586 -Inf  Inf
log_k_M27  -2.300587 -Inf  Inf
log_k_M31  -2.299590 -Inf  Inf
f_DMTA_ilr_1 0.000000 -Inf  Inf
f_DMTA_ilr_2 0.000000 -Inf  Inf
f_DMTA_ilr_3 0.000000 -Inf  Inf
sigma_low   0.100000  0    Inf
rsd_high    0.100000  0    Inf

Fixed parameter values:
      value  type
M23_0      0 state
M27_0      0 state
M31_0      0 state

Results:
      AIC      BIC    logLik
276.9433 301.9414 -128.4716

Optimised, transformed parameters with symmetric confidence intervals:
      Estimate Std. Error  Lower  Upper
DMTA_0    99.64000    1.02000  97.61000 101.70000
log_k_DMTA -2.64800    0.01563  -2.67900  -2.61700
log_k_M23  -3.82300    0.10840  -4.03900  -3.60700
log_k_M27  -5.00800    0.18410  -5.37400  -4.64200
log_k_M31  -4.30800    0.16990  -4.64600  -3.97000
f_DMTA_ilr_1 0.06633    0.05110  -0.03535  0.16800

```

```
f_DMTA_ilr_2 0.27450 0.06358 0.14790 0.40100
f_DMTA_ilr_3 -1.42200 0.05149 -1.52500 -1.32000
sigma_low 0.90680 0.07512 0.75730 1.05600
rsd_high 0.02305 0.00639 0.01034 0.03577
```

Parameter correlation:

```
          DMTA_0 log_k_DMTA log_k_M23 log_k_M27 log_k_M31 f_DMTA_ilr_1
DMTA_0    1.0000000 0.6618048 -0.087913 -0.089881 -0.067224 -0.016877
log_k_DMTA 0.6618048 1.0000000 -0.135778 -0.139036 -0.102624 -0.024679
log_k_M23  -0.0879135 -0.1357783 1.0000000 0.019186 0.014034 0.634297
log_k_M27  -0.0898809 -0.1390358 0.019186 1.0000000 0.014378 -0.496517
log_k_M31  -0.0672241 -0.1026236 0.014034 0.014378 1.0000000 0.002505
f_DMTA_ilr_1 -0.0168772 -0.0246787 0.634297 -0.496517 0.002505 1.0000000
f_DMTA_ilr_2 0.0009349 0.0002647 0.292845 0.232000 -0.713510 0.110938
f_DMTA_ilr_3 -0.4368504 -0.4331884 0.488414 0.388186 0.500504 0.182923
sigma_low 0.1185122 0.1157488 -0.008654 -0.008344 -0.009363 -0.004837
rsd_high  -0.2786848 -0.2551649 0.019075 0.018399 0.020642 0.010657
          f_DMTA_ilr_2 f_DMTA_ilr_3 sigma_low rsd_high
DMTA_0    0.0009349 -0.43685 0.118512 -0.278685
log_k_DMTA 0.0002647 -0.43319 0.115749 -0.255165
log_k_M23 0.2928453 0.48841 -0.008654 0.019075
log_k_M27 0.2320001 0.38819 -0.008344 0.018399
log_k_M31 -0.7135096 0.50050 -0.009363 0.020642
f_DMTA_ilr_1 0.1109380 0.18292 -0.004837 0.010657
f_DMTA_ilr_2 1.0000000 -0.19043 0.002790 -0.006149
f_DMTA_ilr_3 -0.1904340 1.000000 -0.050588 0.111522
sigma_low 0.0027898 -0.05059 1.000000 -0.178354
rsd_high  -0.0061487 0.11152 -0.178354 1.000000
```

Backtransformed parameters:

Confidence intervals for internally transformed parameters are asymmetric.  
t-test (unrealistically) based on the assumption of normal distribution  
for estimators of untransformed parameters.

|               | Estimate  | t value | Pr(>t)    | Lower     | Upper     |
|---------------|-----------|---------|-----------|-----------|-----------|
| DMTA_0        | 99.640000 | 97.640  | 2.869e-85 | 97.610000 | 1.017e+02 |
| k_DMTA        | 0.070800  | 64.000  | 8.844e-71 | 0.068630  | 7.304e-02 |
| k_M23         | 0.021860  | 9.221   | 1.616e-14 | 0.017620  | 2.713e-02 |
| k_M27         | 0.006686  | 5.433   | 2.906e-07 | 0.004635  | 9.643e-03 |
| k_M31         | 0.013470  | 5.887   | 4.414e-08 | 0.009603  | 1.888e-02 |
| f_DMTA_to_M23 | 0.142800  | 16.710  | 4.144e-28 | NA        | NA        |
| f_DMTA_to_M27 | 0.130100  | 20.960  | 1.556e-34 | NA        | NA        |
| f_DMTA_to_M31 | 0.097390  | 14.030  | 1.426e-23 | NA        | NA        |
| sigma_low     | 0.906800  | 12.070  | 5.276e-20 | 0.757300  | 1.056e+00 |
| rsd_high      | 0.023050  | 3.608   | 2.682e-04 | 0.010340  | 3.577e-02 |

FOCUS Chi2 error levels in percent:

|          | err.min | n.optim | df |
|----------|---------|---------|----|
| All data | 6.872   | 8       | 37 |
| DMTA     | 3.520   | 2       | 10 |
| M23      | 9.330   | 2       | 9  |
| M27      | 10.716  | 2       | 9  |
| M31      | 10.649  | 2       | 9  |

Resulting formation fractions:

```
ff
DMTA_M23 0.14284
DMTA_M27 0.13005
DMTA_M31 0.09739
DMTA_sink 0.62972
```

Estimated disappearance times:

|      | DT50   | DT90   |
|------|--------|--------|
| DMTA | 9.79   | 32.52  |
| M23  | 31.71  | 105.33 |
| M27  | 103.68 | 344.41 |
| M31  | 51.48  | 171.00 |

Data:

| time variable | observed | predicted | residual |
|---------------|----------|-----------|----------|
|---------------|----------|-----------|----------|

|         |      |       |         |           |
|---------|------|-------|---------|-----------|
| 0.0000  | DMTA | 98.09 | 99.6371 | -1.547129 |
| 0.0000  | DMTA | 98.77 | 99.6371 | -0.867129 |
| 0.7679  | DMTA | 93.52 | 94.3648 | -0.844840 |
| 0.7679  | DMTA | 92.03 | 94.3648 | -2.334840 |
| 2.3037  | DMTA | 88.39 | 84.6424 | 3.747552  |
| 2.3037  | DMTA | 87.18 | 84.6424 | 2.537552  |
| 5.3752  | DMTA | 69.38 | 68.0995 | 1.280452  |
| 5.3752  | DMTA | 71.06 | 68.0995 | 2.960452  |
| 10.7505 | DMTA | 45.21 | 46.5444 | -1.334381 |
| 10.7505 | DMTA | 46.81 | 46.5444 | 0.265619  |
| 16.1257 | DMTA | 30.54 | 31.8119 | -1.271950 |
| 16.1257 | DMTA | 30.07 | 31.8119 | -1.741950 |
| 21.5010 | DMTA | 21.60 | 21.7427 | -0.142692 |
| 21.5010 | DMTA | 20.41 | 21.7427 | -1.332692 |
| 32.2515 | DMTA | 9.10  | 10.1569 | -1.056858 |
| 32.2515 | DMTA | 9.70  | 10.1569 | -0.456858 |
| 43.0020 | DMTA | 6.58  | 4.7447  | 1.835336  |
| 43.0020 | DMTA | 6.31  | 4.7447  | 1.565336  |
| 53.7525 | DMTA | 3.47  | 2.2164  | 1.253583  |
| 53.7525 | DMTA | 3.52  | 2.2164  | 1.303583  |
| 64.5029 | DMTA | 3.40  | 1.0354  | 2.364625  |
| 64.5029 | DMTA | 3.67  | 1.0354  | 2.634625  |
| 91.3792 | DMTA | 1.62  | 0.1544  | 1.465577  |
| 91.3792 | DMTA | 1.62  | 0.1544  | 1.465577  |
| 0.7679  | M23  | 0.36  | 0.7468  | -0.386752 |
| 0.7679  | M23  | 0.40  | 0.7468  | -0.346752 |
| 2.3037  | M23  | 1.03  | 2.0874  | -1.057376 |
| 2.3037  | M23  | 1.07  | 2.0874  | -1.017376 |
| 5.3752  | M23  | 3.60  | 4.2344  | -0.634443 |
| 5.3752  | M23  | 3.66  | 4.2344  | -0.574443 |
| 10.7505 | M23  | 6.97  | 6.6591  | 0.310869  |
| 10.7505 | M23  | 7.22  | 6.6591  | 0.560869  |
| 16.1257 | M23  | 8.65  | 7.8989  | 0.751060  |
| 16.1257 | M23  | 8.38  | 7.8989  | 0.481060  |
| 21.5010 | M23  | 9.10  | 8.3752  | 0.724810  |
| 21.5010 | M23  | 8.63  | 8.3752  | 0.254810  |
| 32.2515 | M23  | 7.63  | 8.0742  | -0.444247 |
| 32.2515 | M23  | 8.01  | 8.0742  | -0.064247 |
| 43.0020 | M23  | 6.40  | 7.0620  | -0.662008 |
| 43.0020 | M23  | 6.35  | 7.0620  | -0.712008 |
| 53.7525 | M23  | 5.35  | 5.9001  | -0.550054 |
| 53.7525 | M23  | 5.06  | 5.9001  | -0.840054 |
| 64.5029 | M23  | 5.14  | 4.8125  | 0.327515  |
| 64.5029 | M23  | 5.91  | 4.8125  | 1.097515  |
| 91.3792 | M23  | 3.35  | 2.7613  | 0.588728  |
| 91.3792 | M23  | 2.87  | 2.7613  | 0.108728  |
| 0.7679  | M27  | 0.42  | 0.6839  | -0.263891 |
| 0.7679  | M27  | 0.47  | 0.6839  | -0.213891 |
| 2.3037  | M27  | 0.71  | 1.9347  | -1.224721 |
| 2.3037  | M27  | 0.82  | 1.9347  | -1.114721 |
| 5.3752  | M27  | 2.19  | 4.0241  | -1.834077 |
| 5.3752  | M27  | 2.28  | 4.0241  | -1.744077 |
| 10.7505 | M27  | 5.45  | 6.6324  | -1.182390 |
| 10.7505 | M27  | 5.19  | 6.6324  | -1.442390 |
| 16.1257 | M27  | 8.81  | 8.2781  | 0.531923  |
| 16.1257 | M27  | 7.93  | 8.2781  | -0.348077 |
| 21.5010 | M27  | 10.25 | 9.2707  | 0.979330  |
| 21.5010 | M27  | 10.77 | 9.2707  | 1.499330  |
| 32.2515 | M27  | 10.89 | 10.0750 | 0.814956  |
| 32.2515 | M27  | 10.85 | 10.0750 | 0.774956  |
| 43.0020 | M27  | 10.41 | 10.0524 | 0.357582  |
| 43.0020 | M27  | 10.35 | 10.0524 | 0.297582  |
| 53.7525 | M27  | 9.92  | 9.6711  | 0.248904  |
| 53.7525 | M27  | 9.42  | 9.6711  | -0.251096 |
| 64.5029 | M27  | 9.15  | 9.1479  | 0.002075  |
| 64.5029 | M27  | 9.25  | 9.1479  | 0.102075  |
| 91.3792 | M27  | 7.14  | 7.7455  | -0.605458 |
| 91.3792 | M27  | 7.13  | 7.7455  | -0.615458 |
| 0.7679  | M31  | 0.36  | 0.5108  | -0.150781 |

|         |     |      |        |           |
|---------|-----|------|--------|-----------|
| 0.7679  | M31 | 0.33 | 0.5108 | -0.180781 |
| 2.3037  | M31 | 0.55 | 1.4373 | -0.887257 |
| 2.3037  | M31 | 0.64 | 1.4373 | -0.797257 |
| 5.3752  | M31 | 1.94 | 2.9560 | -1.016036 |
| 5.3752  | M31 | 1.62 | 2.9560 | -1.336036 |
| 10.7505 | M31 | 4.22 | 4.7700 | -0.550014 |
| 10.7505 | M31 | 4.37 | 4.7700 | -0.400014 |
| 16.1257 | M31 | 6.31 | 5.8178 | 0.492165  |
| 16.1257 | M31 | 6.85 | 5.8178 | 1.032165  |
| 21.5010 | M31 | 7.05 | 6.3554 | 0.694588  |
| 21.5010 | M31 | 6.84 | 6.3554 | 0.484588  |
| 32.2515 | M31 | 6.53 | 6.5398 | -0.009790 |
| 32.2515 | M31 | 7.11 | 6.5398 | 0.570210  |
| 43.0020 | M31 | 6.06 | 6.1447 | -0.084661 |
| 43.0020 | M31 | 6.05 | 6.1447 | -0.094661 |
| 53.7525 | M31 | 5.50 | 5.5437 | -0.043681 |
| 53.7525 | M31 | 5.07 | 5.5437 | -0.473681 |
| 64.5029 | M31 | 4.94 | 4.9027 | 0.037341  |
| 64.5029 | M31 | 4.39 | 4.9027 | -0.512659 |
| 91.3792 | M31 | 3.64 | 3.4821 | 0.157904  |
| 91.3792 | M31 | 3.55 | 3.4821 | 0.067904  |



**Listing 45:** SFO-SFO3 fit to BBA 2.3 data, constant variance

```

mkin version used for fitting: 1.0.4.9000
R version used for fitting: 4.1.0
Date of fit: Mon Jul 26 14:04:04 2021
Date of summary: Mon Jul 26 18:52:53 2021

Equations:
d_DMTA/dt = - k_DMTA * DMTA
d_M23/dt = + f_DMTA_to_M23 * k_DMTA * DMTA - k_M23 * M23
d_M27/dt = + f_DMTA_to_M27 * k_DMTA * DMTA - k_M27 * M27
d_M31/dt = + f_DMTA_to_M31 * k_DMTA * DMTA - k_M31 * M31

Model predictions using solution type deSolve

Fitted using 1141 model solutions performed in 2.091 s

Error model: Constant variance

Error model algorithm: OLS

Starting values for parameters to be optimised:
      value type
DMTA_0    98.3850 state
k_DMTA     0.1000 deparm
k_M23      0.1001 deparm
k_M27      0.1002 deparm
k_M31      0.1003 deparm
f_DMTA_to_M23 0.2500 deparm
f_DMTA_to_M27 0.2500 deparm
f_DMTA_to_M31 0.2500 deparm

Starting values for the transformed parameters actually optimised:
      value lower upper
DMTA_0    98.385000 -Inf  Inf
log_k_DMTA -2.302585 -Inf  Inf
log_k_M23  -2.301586 -Inf  Inf
log_k_M27  -2.300587 -Inf  Inf
log_k_M31  -2.299590 -Inf  Inf
f_DMTA_ilr_1 0.000000 -Inf  Inf
f_DMTA_ilr_2 0.000000 -Inf  Inf
f_DMTA_ilr_3 0.000000 -Inf  Inf

Fixed parameter values:
      value type
M23_0     0 state
M27_0     0 state
M31_0     0 state

Results:
      AIC      BIC    logLik
332.1562 354.6544 -157.0781

Optimised, transformed parameters with symmetric confidence intervals:
      Estimate Std. Error Lower Upper
DMTA_0    99.9600    0.61970 98.720 101.2000
log_k_DMTA -2.5570    0.01577 -2.588 -2.5260
log_k_M23  -3.8930    0.44330 -4.775 -3.0110
log_k_M27  -4.0520    0.13510 -4.321 -3.7830
log_k_M31  -3.1410    0.12950 -3.399 -2.8830
f_DMTA_ilr_1 -0.8669    0.15860 -1.183 -0.5513
f_DMTA_ilr_2 -0.5641    0.11460 -0.792 -0.3361
f_DMTA_ilr_3 -1.3760    0.10060 -1.576 -1.1760
sigma       1.3860    0.10330  1.180  1.5910

Parameter correlation:

```

|              | DMTA_0     | log_k_DMTA | log_k_M23  | log_k_M27  | log_k_M31  |
|--------------|------------|------------|------------|------------|------------|
| DMTA_0       | 1.000e+00  | 5.394e-01  | -1.938e-02 | -6.730e-02 | -6.097e-02 |
| log_k_DMTA   | 5.394e-01  | 1.000e+00  | -3.593e-02 | -1.248e-01 | -1.130e-01 |
| log_k_M23    | -1.938e-02 | -3.593e-02 | 1.000e+00  | 4.482e-03  | 4.060e-03  |
| log_k_M27    | -6.730e-02 | -1.248e-01 | 4.482e-03  | 1.000e+00  | 1.410e-02  |
| log_k_M31    | -6.097e-02 | -1.130e-01 | 4.060e-03  | 1.410e-02  | 1.000e+00  |
| f_DMTA_ilr_1 | -6.699e-04 | -1.242e-03 | 7.707e-01  | -2.120e-01 | 1.404e-04  |
| f_DMTA_ilr_2 | 9.792e-03  | 1.815e-02  | 6.154e-01  | 1.673e-01  | -4.834e-01 |
| f_DMTA_ilr_3 | -1.805e-01 | -2.146e-01 | 6.346e-01  | 2.859e-01  | 4.062e-01  |
| sigma        | 2.714e-07  | 6.757e-09  | -3.615e-08 | -1.257e-08 | 2.445e-08  |

  

|              | f_DMTA_ilr_1 | f_DMTA_ilr_2 | f_DMTA_ilr_3 | sigma      |
|--------------|--------------|--------------|--------------|------------|
| DMTA_0       | -6.699e-04   | 9.792e-03    | -1.805e-01   | 2.714e-07  |
| log_k_DMTA   | -1.242e-03   | 1.815e-02    | -2.146e-01   | 6.757e-09  |
| log_k_M23    | 7.707e-01    | 6.154e-01    | 6.346e-01    | -3.615e-08 |
| log_k_M27    | -2.120e-01   | 1.673e-01    | 2.859e-01    | -1.257e-08 |
| log_k_M31    | 1.404e-04    | -4.834e-01   | 4.062e-01    | 2.445e-08  |
| f_DMTA_ilr_1 | 1.000e+00    | 6.854e-01    | 6.687e-01    | -4.551e-09 |
| f_DMTA_ilr_2 | 6.854e-01    | 1.000e+00    | 3.832e-01    | -4.563e-09 |
| f_DMTA_ilr_3 | 6.687e-01    | 3.832e-01    | 1.000e+00    | -3.191e-08 |
| sigma        | -4.551e-09   | -4.563e-09   | -3.191e-08   | 1.000e+00  |

Backtransformed parameters:

Confidence intervals for internally transformed parameters are asymmetric.  
t-test (unrealistically) based on the assumption of normal distribution  
for estimators of untransformed parameters.

|               | Estimate | t value | Pr(>t)     | Lower     | Upper     |
|---------------|----------|---------|------------|-----------|-----------|
| DMTA_0        | 99.96000 | 161.300 | 1.175e-103 | 98.720000 | 101.20000 |
| k_DMTA        | 0.07754  | 63.400  | 4.219e-71  | 0.075140  | 0.08001   |
| k_M23         | 0.02039  | 2.256   | 1.339e-02  | 0.008441  | 0.04926   |
| k_M27         | 0.01739  | 7.402   | 5.586e-11  | 0.013290  | 0.02276   |
| k_M31         | 0.04324  | 7.724   | 1.313e-11  | 0.033420  | 0.05594   |
| f_DMTA_to_M23 | 0.05135  | 4.614   | 7.294e-06  | NA        | NA        |
| f_DMTA_to_M27 | 0.17500  | 16.230  | 1.726e-27  | NA        | NA        |
| f_DMTA_to_M31 | 0.18920  | 11.630  | 2.973e-19  | NA        | NA        |
| sigma         | 1.38600  | 13.420  | 1.391e-22  | 1.180000  | 1.59100   |

FOCUS Chi2 error levels in percent:

|          | err.min | n.optim | df |
|----------|---------|---------|----|
| All data | 8.763   | 8       | 37 |
| DMTA     | 4.555   | 2       | 10 |
| M23      | 8.491   | 2       | 9  |
| M27      | 10.561  | 2       | 9  |
| M31      | 14.682  | 2       | 9  |

Resulting formation fractions:

|           | ff      |
|-----------|---------|
| DMTA_M23  | 0.05135 |
| DMTA_M27  | 0.17500 |
| DMTA_M31  | 0.18916 |
| DMTA_sink | 0.58449 |

Estimated disappearance times:

|      | DT50  | DT90   |
|------|-------|--------|
| DMTA | 8.94  | 29.70  |
| M23  | 33.99 | 112.92 |
| M27  | 39.85 | 132.39 |
| M31  | 16.03 | 53.26  |

Data:

|        | time | variable | observed | predicted | residual |
|--------|------|----------|----------|-----------|----------|
| 0.0000 |      | DMTA     | 99.33    | 99.9559   | -0.62590 |
| 0.0000 |      | DMTA     | 97.44    | 99.9559   | -2.51590 |
| 0.6734 |      | DMTA     | 93.73    | 94.8709   | -1.14088 |
| 0.6734 |      | DMTA     | 93.77    | 94.8709   | -1.10088 |
| 2.0202 |      | DMTA     | 87.84    | 85.4638   | 2.37625  |
| 2.0202 |      | DMTA     | 89.82    | 85.4638   | 4.35625  |
| 4.7138 |      | DMTA     | 71.61    | 69.3554   | 2.25465  |
| 4.7138 |      | DMTA     | 71.42    | 69.3554   | 2.06465  |
| 9.4275 |      | DMTA     | 45.60    | 48.1229   | -2.52287 |

|         |      |       |         |          |
|---------|------|-------|---------|----------|
| 9.4275  | DMTA | 45.42 | 48.1229 | -2.70287 |
| 14.1413 | DMTA | 31.12 | 33.3905 | -2.27051 |
| 14.1413 | DMTA | 31.68 | 33.3905 | -1.71051 |
| 18.8550 | DMTA | 23.20 | 23.1683 | 0.03168  |
| 18.8550 | DMTA | 24.13 | 23.1683 | 0.96168  |
| 28.2825 | DMTA | 9.43  | 11.1542 | -1.72418 |
| 28.2825 | DMTA | 9.82  | 11.1542 | -1.33418 |
| 37.7101 | DMTA | 7.08  | 5.3701  | 1.70992  |
| 37.7101 | DMTA | 8.64  | 5.3701  | 3.26992  |
| 47.1376 | DMTA | 4.41  | 2.5854  | 1.82462  |
| 47.1376 | DMTA | 4.78  | 2.5854  | 2.19462  |
| 56.5651 | DMTA | 4.92  | 1.2447  | 3.67529  |
| 56.5651 | DMTA | 5.08  | 1.2447  | 3.83529  |
| 80.1339 | DMTA | 2.13  | 0.2002  | 1.92982  |
| 80.1339 | DMTA | 2.23  | 0.2002  | 2.02982  |
| 0.6734  | M23  | 0.18  | 0.2593  | -0.07934 |
| 0.6734  | M23  | 0.18  | 0.2593  | -0.07934 |
| 2.0202  | M23  | 0.52  | 0.7287  | -0.20872 |
| 2.0202  | M23  | 0.43  | 0.7287  | -0.29872 |
| 4.7138  | M23  | 1.19  | 1.4939  | -0.30393 |
| 4.7138  | M23  | 1.11  | 1.4939  | -0.38393 |
| 9.4275  | M23  | 2.26  | 2.3936  | -0.13360 |
| 9.4275  | M23  | 1.99  | 2.3936  | -0.40360 |
| 14.1413 | M23  | 2.81  | 2.8935  | -0.08349 |
| 14.1413 | M23  | 2.83  | 2.8935  | -0.06349 |
| 18.8550 | M23  | 3.39  | 3.1274  | 0.26263  |
| 18.8550 | M23  | 3.56  | 3.1274  | 0.43263  |
| 28.2825 | M23  | 3.49  | 3.1352  | 0.35476  |
| 28.2825 | M23  | 3.28  | 3.1352  | 0.14476  |
| 37.7101 | M23  | 2.80  | 2.8540  | -0.05403 |
| 37.7101 | M23  | 2.97  | 2.8540  | 0.11597  |
| 47.1376 | M23  | 2.42  | 2.4835  | -0.06350 |
| 47.1376 | M23  | 2.51  | 2.4835  | 0.02650  |
| 56.5651 | M23  | 2.22  | 2.1111  | 0.10892  |
| 56.5651 | M23  | 1.95  | 2.1111  | -0.16108 |
| 80.1339 | M23  | 1.28  | 1.3452  | -0.06522 |
| 80.1339 | M23  | 0.99  | 1.3452  | -0.35522 |
| 0.6734  | M27  | 0.50  | 0.8846  | -0.38464 |
| 0.6734  | M27  | 0.83  | 0.8846  | -0.05464 |
| 2.0202  | M27  | 1.25  | 2.4909  | -1.24095 |
| 2.0202  | M27  | 1.09  | 2.4909  | -1.40095 |
| 4.7138  | M27  | 3.28  | 5.1287  | -1.84866 |
| 4.7138  | M27  | 3.24  | 5.1287  | -1.88866 |
| 9.4275  | M27  | 7.17  | 8.2836  | -1.11355 |
| 9.4275  | M27  | 7.91  | 8.2836  | -0.37355 |
| 14.1413 | M27  | 10.15 | 10.1007 | 0.04931  |
| 14.1413 | M27  | 9.55  | 10.1007 | -0.55069 |
| 18.8550 | M27  | 12.09 | 11.0189 | 1.07111  |
| 18.8550 | M27  | 11.89 | 11.0189 | 0.87111  |
| 28.2825 | M27  | 13.32 | 11.2725 | 2.04745  |
| 28.2825 | M27  | 12.05 | 11.2725 | 0.77745  |
| 37.7101 | M27  | 10.04 | 10.4922 | -0.45220 |
| 37.7101 | M27  | 10.78 | 10.4922 | 0.28780  |
| 47.1376 | M27  | 9.32  | 9.3505  | -0.03053 |
| 47.1376 | M27  | 9.62  | 9.3505  | 0.26947  |
| 56.5651 | M27  | 8.00  | 8.1507  | -0.15073 |
| 56.5651 | M27  | 8.45  | 8.1507  | 0.29927  |
| 80.1339 | M27  | 5.71  | 5.5509  | 0.15906  |
| 80.1339 | M27  | 3.33  | 5.5509  | -2.22094 |
| 0.6734  | M31  | 0.47  | 0.9479  | -0.47789 |
| 0.6734  | M31  | 0.34  | 0.9479  | -0.60789 |
| 2.0202  | M31  | 1.00  | 2.6220  | -1.62201 |
| 2.0202  | M31  | 0.89  | 2.6220  | -1.73201 |
| 4.7138  | M31  | 3.58  | 5.2042  | -1.62425 |
| 4.7138  | M31  | 3.41  | 5.2042  | -1.79425 |
| 9.4275  | M31  | 8.74  | 7.8557  | 0.88430  |
| 9.4275  | M31  | 8.28  | 7.8557  | 0.42430  |
| 14.1413 | M31  | 9.67  | 8.9128  | 0.75719  |
| 14.1413 | M31  | 8.95  | 8.9128  | 0.03719  |

|         |     |       |        |          |
|---------|-----|-------|--------|----------|
| 18.8550 | M31 | 10.34 | 9.0080 | 1.33204  |
| 18.8550 | M31 | 10.00 | 9.0080 | 0.99204  |
| 28.2825 | M31 | 7.89  | 7.8133 | 0.07674  |
| 28.2825 | M31 | 8.13  | 7.8133 | 0.31674  |
| 37.7101 | M31 | 5.06  | 6.0743 | -1.01429 |
| 37.7101 | M31 | 5.54  | 6.0743 | -0.53429 |
| 47.1376 | M31 | 3.79  | 4.4629 | -0.67289 |
| 47.1376 | M31 | 4.11  | 4.4629 | -0.35289 |
| 56.5651 | M31 | 3.11  | 3.1721 | -0.06206 |
| 56.5651 | M31 | 2.98  | 3.1721 | -0.19206 |
| 80.1339 | M31 | 1.78  | 1.2514 | 0.52855  |
| 80.1339 | M31 | 1.55  | 1.2514 | 0.29855  |

**Listing 46:** SFO-SFO3 fit to BBA 2.3 data, two-component error

```

mkin version used for fitting: 1.0.4.9000
R version used for fitting: 4.1.0
Date of fit: Mon Jul 26 14:04:49 2021
Date of summary: Mon Jul 26 18:52:53 2021

Equations:
d_DMTA/dt = - k_DMTA * DMTA
d_M23/dt = + f_DMTA_to_M23 * k_DMTA * DMTA - k_M23 * M23
d_M27/dt = + f_DMTA_to_M27 * k_DMTA * DMTA - k_M27 * M27
d_M31/dt = + f_DMTA_to_M31 * k_DMTA * DMTA - k_M31 * M31

Model predictions using solution type deSolve

Fitted using 5174 model solutions performed in 9.751 s

Error model: Two-component variance function

Error model algorithm: d_3
Direct fitting and three-step fitting yield approximately the same likelihood

Starting values for parameters to be optimised:
      value  type
DMTA_0    98.3850 state
k_DMTA     0.1000 deparm
k_M23      0.1001 deparm
k_M27      0.1002 deparm
k_M31      0.1003 deparm
f_DMTA_to_M23 0.2500 deparm
f_DMTA_to_M27 0.2500 deparm
f_DMTA_to_M31 0.2500 deparm
sigma_low  0.1000 error
rsd_high   0.1000 error

Starting values for the transformed parameters actually optimised:
      value lower upper
DMTA_0    98.385000 -Inf  Inf
log_k_DMTA -2.302585 -Inf  Inf
log_k_M23  -2.301586 -Inf  Inf
log_k_M27  -2.300587 -Inf  Inf
log_k_M31  -2.299590 -Inf  Inf
f_DMTA_ilr_1 0.000000 -Inf  Inf
f_DMTA_ilr_2 0.000000 -Inf  Inf
f_DMTA_ilr_3 0.000000 -Inf  Inf
sigma_low   0.100000  0    Inf
rsd_high    0.100000  0    Inf

Fixed parameter values:
      value  type
M23_0     0 state
M27_0     0 state
M31_0     0 state

Results:
      AIC      BIC    logLik
323.0818 348.0799 -151.5409

Optimised, transformed parameters with symmetric confidence intervals:
      Estimate Std. Error Lower Upper
DMTA_0    99.21000    1.42700 96.370000 102.0000
log_k_DMTA -2.56800    0.02341 -2.614000 -2.5210
log_k_M23  -3.88200    0.37430 -4.627000 -3.1370
log_k_M27  -4.04200    0.11800 -4.277000 -3.8070
log_k_M31  -3.13300    0.11200 -3.356000 -2.9100
f_DMTA_ilr_1 -0.86560    0.13490 -1.134000 -0.5971

```

```
f_DMTA_ilr_2 -0.56460    0.09789 -0.759400 -0.3698
f_DMTA_ilr_3 -1.35700    0.09412 -1.544000 -1.1690
sigma_low     1.17100    0.10260  0.966900  1.3750
rsd_high      0.02966    0.01032  0.009112  0.0502
```

Parameter correlation:

```
          DMTA_0 log_k_DMTA log_k_M23 log_k_M27 log_k_M31 f_DMTA_ilr_1
DMTA_0      1.000000    0.731570  -0.04615  -0.14966  -0.136270  -0.005036
log_k_DMTA   0.731570    1.000000  -0.06310  -0.20594  -0.187805  -0.005969
log_k_M23   -0.046151   -0.063096    1.000000   0.01299   0.011850   0.769448
log_k_M27   -0.149660   -0.205937   0.01299    1.000000   0.038757  -0.212810
log_k_M31   -0.136270   -0.187805   0.01185    0.03876    1.000000   0.001067
f_DMTA_ilr_1 -0.005036  -0.005969   0.76945  -0.21281   0.001067    1.000000
f_DMTA_ilr_2  0.019625   0.027781   0.61011   0.16448  -0.485013   0.676866
f_DMTA_ilr_3 -0.409744  -0.418631   0.59774   0.32623   0.430168   0.606442
sigma_low    0.254075   0.287115  -0.01809  -0.05539  -0.049710  -0.004226
rsd_high    -0.488099  -0.533088   0.03358   0.10283   0.092296   0.007844

          f_DMTA_ilr_2 f_DMTA_ilr_3 sigma_low  rsd_high
DMTA_0      0.019625   -0.4097   0.254075  -0.488099
log_k_DMTA   0.027781   -0.4186   0.287115  -0.533088
log_k_M23     0.610109    0.5977  -0.018086   0.033575
log_k_M27     0.164477    0.3262  -0.055385   0.102834
log_k_M31    -0.485013    0.4302  -0.049710   0.092296
f_DMTA_ilr_1  0.676866    0.6064  -0.004226   0.007844
f_DMTA_ilr_2  1.000000    0.3334   0.005353  -0.009939
f_DMTA_ilr_3  0.333399    1.0000  -0.121839   0.226215
sigma_low     0.005353   -0.1218   1.000000  -0.331063
rsd_high     -0.009939    0.2262  -0.331063   1.000000
```

Backtransformed parameters:

Confidence intervals for internally transformed parameters are asymmetric.  
t-test (unrealistically) based on the assumption of normal distribution  
for estimators of untransformed parameters.

|               | Estimate | t value | Pr(>t)    | Lower     | Upper      |
|---------------|----------|---------|-----------|-----------|------------|
| DMTA_0        | 99.21000 | 69.520  | 1.324e-73 | 96.370000 | 102.000000 |
| k_DMTA        | 0.07670  | 42.710  | 3.902e-57 | 0.073210  | 0.08036    |
| k_M23         | 0.02061  | 2.671   | 4.574e-03 | 0.009787  | 0.04342    |
| k_M27         | 0.01757  | 8.476   | 4.712e-13 | 0.013890  | 0.02222    |
| k_M31         | 0.04360  | 8.927   | 6.119e-14 | 0.034890  | 0.05449    |
| f_DMTA_to_M23 | 0.05206  | 5.389   | 3.482e-07 | NA        | NA         |
| f_DMTA_to_M27 | 0.17710  | 17.130  | 8.602e-29 | NA        | NA         |
| f_DMTA_to_M31 | 0.19170  | 12.730  | 3.132e-21 | NA        | NA         |
| sigma_low     | 1.17100  | 11.410  | 9.139e-19 | 0.966900  | 1.37500    |
| rsd_high      | 0.02966  | 2.873   | 2.604e-03 | 0.009112  | 0.05020    |

FOCUS Chi2 error levels in percent:

|          | err.min | n.optim | df |
|----------|---------|---------|----|
| All data | 8.839   | 8       | 37 |
| DMTA     | 4.615   | 2       | 10 |
| M23      | 8.403   | 2       | 9  |
| M27      | 10.473  | 2       | 9  |
| M31      | 14.655  | 2       | 9  |

Resulting formation fractions:

```
ff
DMTA_M23  0.05206
DMTA_M27  0.17708
DMTA_M31  0.19171
DMTA_sink 0.57915
```

Estimated disappearance times:

|      | DT50   | DT90   |
|------|--------|--------|
| DMTA | 9.037  | 30.02  |
| M23  | 33.624 | 111.70 |
| M27  | 39.457 | 131.07 |
| M31  | 15.898 | 52.81  |

Data:

time variable observed predicted residual

|         |      |       |         |          |
|---------|------|-------|---------|----------|
| 0.0000  | DMTA | 99.33 | 99.2054 | 0.12461  |
| 0.0000  | DMTA | 97.44 | 99.2054 | -1.76539 |
| 0.6734  | DMTA | 93.73 | 94.2116 | -0.48163 |
| 0.6734  | DMTA | 93.77 | 94.2116 | -0.44163 |
| 2.0202  | DMTA | 87.84 | 84.9656 | 2.87443  |
| 2.0202  | DMTA | 89.82 | 84.9656 | 4.85443  |
| 4.7138  | DMTA | 71.61 | 69.1067 | 2.50334  |
| 4.7138  | DMTA | 71.42 | 69.1067 | 2.31334  |
| 9.4275  | DMTA | 45.60 | 48.1398 | -2.53983 |
| 9.4275  | DMTA | 45.42 | 48.1398 | -2.71983 |
| 14.1413 | DMTA | 31.12 | 33.5343 | -2.41430 |
| 14.1413 | DMTA | 31.68 | 33.5343 | -1.85430 |
| 18.8550 | DMTA | 23.20 | 23.3601 | -0.16006 |
| 18.8550 | DMTA | 24.13 | 23.3601 | 0.76994  |
| 28.2825 | DMTA | 9.43  | 11.3356 | -1.90556 |
| 28.2825 | DMTA | 9.82  | 11.3356 | -1.51556 |
| 37.7101 | DMTA | 7.08  | 5.5006  | 1.57937  |
| 37.7101 | DMTA | 8.64  | 5.5006  | 3.13937  |
| 47.1376 | DMTA | 4.41  | 2.6692  | 1.74080  |
| 47.1376 | DMTA | 4.78  | 2.6692  | 2.11080  |
| 56.5651 | DMTA | 4.92  | 1.2952  | 3.62476  |
| 56.5651 | DMTA | 5.08  | 1.2952  | 3.78476  |
| 80.1339 | DMTA | 2.13  | 0.2125  | 1.91754  |
| 80.1339 | DMTA | 2.23  | 0.2125  | 2.01754  |
| 0.6734  | M23  | 0.18  | 0.2582  | -0.07818 |
| 0.6734  | M23  | 0.18  | 0.2582  | -0.07818 |
| 2.0202  | M23  | 0.52  | 0.7258  | -0.20577 |
| 2.0202  | M23  | 0.43  | 0.7258  | -0.29577 |
| 4.7138  | M23  | 1.19  | 1.4890  | -0.29898 |
| 4.7138  | M23  | 1.11  | 1.4890  | -0.37898 |
| 9.4275  | M23  | 2.26  | 2.3883  | -0.12832 |
| 9.4275  | M23  | 1.99  | 2.3883  | -0.39832 |
| 14.1413 | M23  | 2.81  | 2.8897  | -0.07970 |
| 14.1413 | M23  | 2.83  | 2.8897  | -0.05970 |
| 18.8550 | M23  | 3.39  | 3.1254  | 0.26457  |
| 18.8550 | M23  | 3.56  | 3.1254  | 0.43457  |
| 28.2825 | M23  | 3.49  | 3.1358  | 0.35421  |
| 28.2825 | M23  | 3.28  | 3.1358  | 0.14421  |
| 37.7101 | M23  | 2.80  | 2.8548  | -0.05483 |
| 37.7101 | M23  | 2.97  | 2.8548  | 0.11517  |
| 47.1376 | M23  | 2.42  | 2.4830  | -0.06303 |
| 47.1376 | M23  | 2.51  | 2.4830  | 0.02697  |
| 56.5651 | M23  | 2.22  | 2.1087  | 0.11128  |
| 56.5651 | M23  | 1.95  | 2.1087  | -0.15872 |
| 80.1339 | M23  | 1.28  | 1.3388  | -0.05883 |
| 80.1339 | M23  | 0.99  | 1.3388  | -0.34883 |
| 0.6734  | M27  | 0.50  | 0.8790  | -0.37903 |
| 0.6734  | M27  | 0.83  | 0.8790  | -0.04903 |
| 2.0202  | M27  | 1.25  | 2.4762  | -1.22620 |
| 2.0202  | M27  | 1.09  | 2.4762  | -1.38620 |
| 4.7138  | M27  | 3.28  | 5.1024  | -1.82239 |
| 4.7138  | M27  | 3.24  | 5.1024  | -1.86239 |
| 9.4275  | M27  | 7.17  | 8.2512  | -1.08123 |
| 9.4275  | M27  | 7.91  | 8.2512  | -0.34123 |
| 14.1413 | M27  | 10.15 | 10.0715 | 0.07854  |
| 14.1413 | M27  | 9.55  | 10.0715 | -0.52146 |
| 18.8550 | M27  | 12.09 | 10.9958 | 1.09417  |
| 18.8550 | M27  | 11.89 | 10.9958 | 0.89417  |
| 28.2825 | M27  | 13.32 | 11.2605 | 2.05949  |
| 28.2825 | M27  | 12.05 | 11.2605 | 0.78949  |
| 37.7101 | M27  | 10.04 | 10.4847 | -0.44469 |
| 37.7101 | M27  | 10.78 | 10.4847 | 0.29531  |
| 47.1376 | M27  | 9.32  | 9.3420  | -0.02196 |
| 47.1376 | M27  | 9.62  | 9.3420  | 0.27804  |
| 56.5651 | M27  | 8.00  | 8.1381  | -0.13814 |
| 56.5651 | M27  | 8.45  | 8.1381  | 0.31186  |
| 80.1339 | M27  | 5.71  | 5.5270  | 0.18301  |
| 80.1339 | M27  | 3.33  | 5.5270  | -2.19699 |
| 0.6734  | M31  | 0.47  | 0.9433  | -0.47332 |

|         |     |       |        |          |
|---------|-----|-------|--------|----------|
| 0.6734  | M31 | 0.34  | 0.9433 | -0.60332 |
| 2.0202  | M31 | 1.00  | 2.6102 | -1.61018 |
| 2.0202  | M31 | 0.89  | 2.6102 | -1.72018 |
| 4.7138  | M31 | 3.58  | 5.1837 | -1.60373 |
| 4.7138  | M31 | 3.41  | 5.1837 | -1.77373 |
| 9.4275  | M31 | 8.74  | 7.8317 | 0.90829  |
| 9.4275  | M31 | 8.28  | 7.8317 | 0.44829  |
| 14.1413 | M31 | 9.67  | 8.8922 | 0.77783  |
| 14.1413 | M31 | 8.95  | 8.8922 | 0.05783  |
| 18.8550 | M31 | 10.34 | 8.9925 | 1.34755  |
| 18.8550 | M31 | 10.00 | 8.9925 | 1.00755  |
| 28.2825 | M31 | 7.89  | 7.8058 | 0.08425  |
| 28.2825 | M31 | 8.13  | 7.8058 | 0.32425  |
| 37.7101 | M31 | 5.06  | 6.0698 | -1.00975 |
| 37.7101 | M31 | 5.54  | 6.0698 | -0.52975 |
| 47.1376 | M31 | 3.79  | 4.4582 | -0.66823 |
| 47.1376 | M31 | 4.11  | 4.4582 | -0.34823 |
| 56.5651 | M31 | 3.11  | 3.1663 | -0.05633 |
| 56.5651 | M31 | 2.98  | 3.1663 | -0.18633 |
| 80.1339 | M31 | 1.78  | 1.2446 | 0.53537  |
| 80.1339 | M31 | 1.55  | 1.2446 | 0.30537  |



**Listing 47:** SFO-SFO3 fit to Borstel data, constant variance

```

mkin version used for fitting: 1.0.4.9000
R version used for fitting: 4.1.0
Date of fit: Mon Jul 26 14:04:07 2021
Date of summary: Mon Jul 26 18:52:53 2021

Equations:
d_DMTA/dt = - k_DMTA * DMTA
d_M23/dt = + f_DMTA_to_M23 * k_DMTA * DMTA - k_M23 * M23
d_M27/dt = + f_DMTA_to_M27 * k_DMTA * DMTA - k_M27 * M27
d_M31/dt = + f_DMTA_to_M31 * k_DMTA * DMTA - k_M31 * M31

Model predictions using solution type deSolve

Fitted using 1435 model solutions performed in 2.154 s

Error model: Constant variance

Error model algorithm: OLS

Starting values for parameters to be optimised:
      value  type
DMTA_0    100.2000 state
k_DMTA      0.1000 deparm
k_M23       0.1001 deparm
k_M27       0.1002 deparm
k_M31       0.1003 deparm
f_DMTA_to_M23 0.2500 deparm
f_DMTA_to_M27 0.2500 deparm
f_DMTA_to_M31 0.2500 deparm

Starting values for the transformed parameters actually optimised:
      value lower upper
DMTA_0    100.200000 -Inf  Inf
log_k_DMTA -2.302585 -Inf  Inf
log_k_M23  -2.301586 -Inf  Inf
log_k_M27  -2.300587 -Inf  Inf
log_k_M31  -2.299590 -Inf  Inf
f_DMTA_ilr_1 0.000000 -Inf  Inf
f_DMTA_ilr_2 0.000000 -Inf  Inf
f_DMTA_ilr_3 0.000000 -Inf  Inf

Fixed parameter values:
      value  type
M23_0      0 state
M27_0      0 state
M31_0      0 state

Results:
      AIC      BIC    logLik
224.1766 243.1745 -103.0883

Optimised, transformed parameters with symmetric confidence intervals:
      Estimate Std. Error   Lower   Upper
DMTA_0    97.21000    0.52580  96.1500  98.2600
log_k_DMTA -3.77900    0.01477  -3.8090 -3.7490
log_k_M23  -7.75000    4.13500 -16.0500  0.5469
log_k_M27  -8.28600   16.36000 -41.1100  24.5400
log_k_M31  -4.87700    0.59520  -6.0710 -3.6830
f_DMTA_ilr_1 0.56390    0.18850   0.1857  0.9420
f_DMTA_ilr_2 0.04681    0.20900  -0.3727  0.4663
f_DMTA_ilr_3 -1.77600    0.13480  -2.0460 -1.5050
sigma      1.31100    0.11870   1.0730  1.5500

Parameter correlation:

```

|              | DMTA_0       | log_k_DMTA   | log_k_M23    | log_k_M27  | log_k_M31  |
|--------------|--------------|--------------|--------------|------------|------------|
| DMTA_0       | 1.000e+00    | 5.213e-01    | -3.412e-02   | -1.445e-02 | -1.945e-02 |
| log_k_DMTA   | 5.213e-01    | 1.000e+00    | -6.546e-02   | -2.771e-02 | -3.731e-02 |
| log_k_M23    | -3.412e-02   | -6.546e-02   | 1.000e+00    | 1.814e-03  | 2.442e-03  |
| log_k_M27    | -1.445e-02   | -2.771e-02   | 1.814e-03    | 1.000e+00  | 1.034e-03  |
| log_k_M31    | -1.945e-02   | -3.731e-02   | 2.442e-03    | 1.034e-03  | 1.000e+00  |
| f_DMTA_ilr_1 | -3.340e-04   | -6.406e-04   | 3.591e-01    | -8.385e-01 | 2.390e-05  |
| f_DMTA_ilr_2 | 1.698e-03    | 3.257e-03    | 1.866e-01    | 4.364e-01  | -7.576e-01 |
| f_DMTA_ilr_3 | -1.057e-01   | -1.345e-01   | 3.338e-01    | 6.088e-01  | 5.747e-01  |
| sigma        | -1.353e-07   | -1.197e-07   | 1.823e-09    | -1.810e-08 | 4.215e-09  |
|              | f_DMTA_ilr_1 | f_DMTA_ilr_2 | f_DMTA_ilr_3 | sigma      |            |
| DMTA_0       | -3.340e-04   | 1.698e-03    | -1.057e-01   | -1.353e-07 |            |
| log_k_DMTA   | -6.406e-04   | 3.257e-03    | -1.345e-01   | -1.197e-07 |            |
| log_k_M23    | 3.591e-01    | 1.866e-01    | 3.338e-01    | 1.823e-09  |            |
| log_k_M27    | -8.385e-01   | 4.364e-01    | 6.088e-01    | -1.810e-08 |            |
| log_k_M31    | 2.390e-05    | -7.576e-01   | 5.747e-01    | 4.215e-09  |            |
| f_DMTA_ilr_1 | 1.000e+00    | -3.560e-01   | -4.643e-01   | 1.552e-08  |            |
| f_DMTA_ilr_2 | -3.560e-01   | 1.000e+00    | -1.581e-01   | -9.425e-09 |            |
| f_DMTA_ilr_3 | -4.643e-01   | -1.581e-01   | 1.000e+00    | 5.301e-09  |            |
| sigma        | 1.552e-08    | -9.425e-09   | 5.301e-09    | 1.000e+00  |            |

Backtransformed parameters:

Confidence intervals for internally transformed parameters are asymmetric.  
t-test (unrealistically) based on the assumption of normal distribution  
for estimators of untransformed parameters.

|               | Estimate  | t value   | Pr(>t)    | Lower     | Upper     |
|---------------|-----------|-----------|-----------|-----------|-----------|
| DMTA_0        | 9.721e+01 | 184.90000 | 2.901e-75 | 9.615e+01 | 9.826e+01 |
| k_DMTA        | 2.284e-02 | 67.71000  | 1.092e-52 | 2.218e-02 | 2.353e-02 |
| k_M23         | 4.309e-04 | 0.24190   | 4.049e-01 | 1.074e-07 | 1.728e+00 |
| k_M27         | 2.520e-04 | 0.06113   | 4.757e-01 | 1.400e-18 | 4.538e+10 |
| k_M31         | 7.618e-03 | 1.68000   | 4.945e-02 | 2.308e-03 | 2.515e-02 |
| f_DMTA_to_M23 | 1.389e-01 | 9.34000   | 5.199e-13 | NA        | NA        |
| f_DMTA_to_M27 | 6.255e-02 | 4.08100   | 7.737e-05 | NA        | NA        |
| f_DMTA_to_M31 | 8.801e-02 | 4.56200   | 1.562e-05 | NA        | NA        |
| sigma         | 1.311e+00 | 11.05000  | 1.501e-15 | 1.073e+00 | 1.550e+00 |

FOCUS Chi2 error levels in percent:

|          | err.min | n.optim | df |
|----------|---------|---------|----|
| All data | 6.217   | 8       | 21 |
| DMTA     | 2.585   | 2       | 6  |
| M23      | 19.213  | 2       | 5  |
| M27      | 3.918   | 2       | 5  |
| M31      | 5.428   | 2       | 5  |

Resulting formation fractions:

|           | ff      |
|-----------|---------|
| DMTA_M23  | 0.13886 |
| DMTA_M27  | 0.06255 |
| DMTA_M31  | 0.08801 |
| DMTA_sink | 0.71058 |

Estimated disappearance times:

|      | DT50    | DT90   |
|------|---------|--------|
| DMTA | 30.34   | 100.8  |
| M23  | 1608.69 | 5344.0 |
| M27  | 2750.24 | 9136.1 |
| M31  | 90.98   | 302.2  |

Data:

| time   | variable | observed | predicted | residual  |
|--------|----------|----------|-----------|-----------|
| 0.000  | DMTA     | 100.5    | 97.2083   | 3.291744  |
| 0.000  | DMTA     | 100.5    | 97.2083   | 3.291744  |
| 0.000  | DMTA     | 99.6     | 97.2083   | 2.391744  |
| 1.941  | DMTA     | 91.9     | 92.9918   | -1.091818 |
| 1.941  | DMTA     | 91.3     | 92.9918   | -1.691818 |
| 6.795  | DMTA     | 81.8     | 83.2336   | -1.433603 |
| 6.795  | DMTA     | 82.1     | 83.2336   | -1.133603 |
| 13.589 | DMTA     | 69.1     | 71.2679   | -2.167946 |
| 13.589 | DMTA     | 68.0     | 71.2679   | -3.267946 |

|         |      |      |         |           |
|---------|------|------|---------|-----------|
| 27.178  | DMTA | 51.4 | 52.2499 | -0.849884 |
| 27.178  | DMTA | 51.4 | 52.2499 | -0.849884 |
| 27.178  | DMTA | 51.4 | 52.2499 | -0.849884 |
| 56.298  | DMTA | 26.8 | 26.8664 | -0.066376 |
| 56.298  | DMTA | 27.6 | 26.8664 | 0.733624  |
| 56.298  | DMTA | 26.8 | 26.8664 | -0.066376 |
| 86.388  | DMTA | 15.7 | 13.5115 | 2.188498  |
| 86.388  | DMTA | 15.7 | 13.5115 | 2.188498  |
| 86.388  | DMTA | 15.3 | 13.5115 | 1.788498  |
| 115.507 | DMTA | 7.9  | 6.9475  | 0.952519  |
| 115.507 | DMTA | 7.9  | 6.9475  | 0.952519  |
| 115.507 | DMTA | 8.1  | 6.9475  | 1.152519  |
| 1.941   | M23  | 0.4  | 0.5852  | -0.185245 |
| 1.941   | M23  | 0.5  | 0.5852  | -0.085245 |
| 6.795   | M23  | 1.2  | 1.9376  | -0.737598 |
| 6.795   | M23  | 1.3  | 1.9376  | -0.637598 |
| 13.589  | M23  | 2.8  | 3.5910  | -0.790983 |
| 13.589  | M23  | 2.0  | 3.5910  | -1.590983 |
| 27.178  | M23  | 2.9  | 6.2027  | -3.302737 |
| 27.178  | M23  | 4.9  | 6.2027  | -1.302737 |
| 56.298  | M23  | 12.2 | 9.6257  | 2.574305  |
| 56.298  | M23  | 12.2 | 9.6257  | 2.574305  |
| 86.388  | M23  | 12.2 | 11.3428 | 0.857178  |
| 86.388  | M23  | 12.0 | 11.3428 | 0.657178  |
| 115.507 | M23  | 10.4 | 12.1065 | -1.706549 |
| 115.507 | M23  | 11.6 | 12.1065 | -0.506549 |
| 1.941   | M27  | 0.3  | 0.2637  | 0.036307  |
| 6.795   | M27  | 0.8  | 0.8734  | -0.073411 |
| 6.795   | M27  | 0.9  | 0.8734  | 0.026589  |
| 13.589  | M27  | 1.4  | 1.6198  | -0.219767 |
| 13.589  | M27  | 1.4  | 1.6198  | -0.219767 |
| 27.178  | M27  | 2.7  | 2.8018  | -0.101756 |
| 27.178  | M27  | 2.6  | 2.8018  | -0.201756 |
| 56.298  | M27  | 4.4  | 4.3627  | 0.037327  |
| 56.298  | M27  | 4.7  | 4.3627  | 0.337327  |
| 86.388  | M27  | 5.4  | 5.1616  | 0.238396  |
| 86.388  | M27  | 5.2  | 5.1616  | 0.038396  |
| 115.507 | M27  | 5.4  | 5.5328  | -0.132803 |
| 115.507 | M27  | 5.4  | 5.5328  | -0.132803 |
| 1.941   | M31  | 0.1  | 0.3683  | -0.268328 |
| 6.795   | M31  | 1.0  | 1.1978  | -0.197785 |
| 6.795   | M31  | 0.9  | 1.1978  | -0.297785 |
| 13.589  | M31  | 2.0  | 2.1630  | -0.162954 |
| 13.589  | M31  | 2.5  | 2.1630  | 0.337046  |
| 27.178  | M31  | 4.3  | 3.5360  | 0.764002  |
| 27.178  | M31  | 3.2  | 3.5360  | -0.335998 |
| 56.298  | M31  | 4.3  | 4.8116  | -0.511617 |
| 56.298  | M31  | 4.8  | 4.8116  | -0.011617 |
| 86.388  | M31  | 5.0  | 4.8626  | 0.137368  |
| 86.388  | M31  | 5.1  | 4.8626  | 0.237368  |
| 115.507 | M31  | 4.3  | 4.4070  | -0.106973 |
| 115.507 | M31  | 4.4  | 4.4070  | -0.006973 |

**Listing 48:** SFO-SFO3 fit to Borstel data, two-component error

```

mkin version used for fitting: 1.0.4.9000
R version used for fitting: 4.1.0
Date of fit: Mon Jul 26 14:04:55 2021
Date of summary: Mon Jul 26 18:52:54 2021

Equations:
d_DMTA/dt = - k_DMTA * DMTA
d_M23/dt = + f_DMTA_to_M23 * k_DMTA * DMTA - k_M23 * M23
d_M27/dt = + f_DMTA_to_M27 * k_DMTA * DMTA - k_M27 * M27
d_M31/dt = + f_DMTA_to_M31 * k_DMTA * DMTA - k_M31 * M31

Model predictions using solution type deSolve

Fitted using 6215 model solutions performed in 10.568 s

Error model: Two-component variance function

Error model algorithm: d_3
Three-step fitting yielded a higher likelihood than direct fitting

Starting values for parameters to be optimised:
      value  type
DMTA_0    100.2000 state
k_DMTA      0.1000 deparm
k_M23       0.1001 deparm
k_M27       0.1002 deparm
k_M31       0.1003 deparm
f_DMTA_to_M23 0.2500 deparm
f_DMTA_to_M27 0.2500 deparm
f_DMTA_to_M31 0.2500 deparm
sigma_low   0.1000 error
rsd_high    0.1000 error

Starting values for the transformed parameters actually optimised:
      value lower upper
DMTA_0  100.2000000 -Inf  Inf
log_k_DMTA -2.302585 -Inf  Inf
log_k_M23 -2.301586 -Inf  Inf
log_k_M27 -2.300587 -Inf  Inf
log_k_M31 -2.299590 -Inf  Inf
f_DMTA_ilr_1 0.000000 -Inf  Inf
f_DMTA_ilr_2 0.000000 -Inf  Inf
f_DMTA_ilr_3 0.000000 -Inf  Inf
sigma_low  0.1000000  0    Inf
rsd_high   0.1000000  0    Inf

Fixed parameter values:
      value  type
M23_0     0 state
M27_0     0 state
M31_0     0 state

Warning(s):
Optimisation did not converge:
iteration limit reached without convergence (10)

Results:
      AIC      BIC    logLik
198.7345 219.8432 -89.36725

Optimised, transformed parameters with symmetric confidence intervals:
      Estimate Std. Error   Lower   Upper
DMTA_0    91.550000    3.69000    84.14000    98.96000

```

|              |            |           |            |          |
|--------------|------------|-----------|------------|----------|
| log_k_DMTA   | -3.866000  | 0.03295   | -3.93200   | -3.8000  |
| log_k_M23    | -16.830000 | 114.00000 | -245.70000 | 212.0000 |
| log_k_M27    | -9.881000  | 33.37000  | -76.87000  | 57.1100  |
| log_k_M31    | -4.823000  | 0.21570   | -5.25600   | -4.3900  |
| f_DMTA_ilr_1 | 0.522500   | 0.06072   | 0.40060    | 0.6444   |
| f_DMTA_ilr_2 | -0.002031  | 0.06457   | -0.13170   | 0.1276   |
| f_DMTA_ilr_3 | -1.714000  | 0.08612   | -1.88700   | -1.5420  |
| sigma_low    | 0.127500   | 0.05236   | 0.02237    | 0.2326   |
| rsd_high     | 0.135200   | 0.01520   | 0.10460    | 0.1657   |

Parameter correlation:

|              | DMTA_0     | log_k_DMTA | log_k_M23  | log_k_M27 | log_k_M31  | f_DMTA_ilr_1 |
|--------------|------------|------------|------------|-----------|------------|--------------|
| DMTA_0       | 1.0000000  | 0.693095   | -0.0005559 | -0.131429 | -0.1352637 | 0.116618     |
| log_k_DMTA   | 0.6930949  | 1.0000000  | -0.0006430 | -0.188884 | -0.2130699 | 0.159277     |
| log_k_M23    | -0.0005559 | -0.000643  | 1.0000000  | 0.000118  | 0.0001844  | 0.002452     |
| log_k_M27    | -0.1314291 | -0.188884  | 0.0001180  | 1.0000000 | 0.0379375  | -0.739236    |
| log_k_M31    | -0.1352637 | -0.213070  | 0.0001844  | 0.037938  | 1.0000000  | -0.009294    |
| f_DMTA_ilr_1 | 0.1166176  | 0.159277   | 0.0024515  | -0.739236 | -0.0092937 | 1.000000     |
| f_DMTA_ilr_2 | 0.0348605  | 0.065741   | 0.0012893  | 0.373955  | -0.6731402 | -0.312265    |
| f_DMTA_ilr_3 | -0.8113088 | -0.753708  | 0.0016761  | 0.403102  | 0.4212725  | -0.292497    |
| sigma_low    | 0.1010415  | 0.091859   | 0.0004694  | -0.027565 | 0.1979095  | 0.121734     |
| rsd_high     | -0.1335354 | -0.052943  | 0.0011821  | 0.015185  | -0.1142614 | -0.071396    |

  

|              | f_DMTA_ilr_2 | f_DMTA_ilr_3 | sigma_low  | rsd_high  |
|--------------|--------------|--------------|------------|-----------|
| DMTA_0       | 0.034860     | -0.811309    | 0.1010415  | -0.133535 |
| log_k_DMTA   | 0.065741     | -0.753708    | 0.0918587  | -0.052943 |
| log_k_M23    | 0.001289     | 0.001676     | 0.0004694  | 0.001182  |
| log_k_M27    | 0.373955     | 0.403102     | -0.0275646 | 0.015185  |
| log_k_M31    | -0.673140    | 0.421273     | 0.1979095  | -0.114261 |
| f_DMTA_ilr_1 | -0.312265    | -0.292497    | 0.1217336  | -0.071396 |
| f_DMTA_ilr_2 | 1.000000     | -0.124931    | -0.1834204 | 0.104747  |
| f_DMTA_ilr_3 | -0.124931    | 1.000000     | 0.0598538  | -0.036004 |
| sigma_low    | -0.183420    | 0.059854     | 1.0000000  | -0.378294 |
| rsd_high     | 0.104747     | -0.036004    | -0.3782944 | 1.000000  |

Backtransformed parameters:

Confidence intervals for internally transformed parameters are asymmetric.  
t-test (unrealistically) based on the assumption of normal distribution  
for estimators of untransformed parameters.

|               | Estimate  | t value   | Pr(>t)    | Lower      | Upper     |
|---------------|-----------|-----------|-----------|------------|-----------|
| DMTA_0        | 9.155e+01 | 2.437e+01 | 4.574e-30 | 8.414e+01  | 9.896e+01 |
| k_DMTA        | 2.095e-02 | 2.965e+01 | 3.987e-34 | 1.961e-02  | 2.238e-02 |
| k_M23         | 4.914e-08 | 2.504e-05 | 5.000e-01 | 1.982e-107 | 1.219e+92 |
| k_M27         | 5.116e-05 | 3.129e-02 | 4.876e-01 | 4.121e-34  | 6.351e+24 |
| k_M31         | 8.041e-03 | 4.625e+00 | 1.297e-05 | 5.215e-03  | 1.240e-02 |
| f_DMTA_to_M23 | 1.393e-01 | 9.182e+00 | 1.089e-12 | NA         | NA        |
| f_DMTA_to_M27 | 6.653e-02 | 1.026e+01 | 2.695e-14 | NA         | NA        |
| f_DMTA_to_M31 | 9.651e-02 | 1.068e+01 | 6.566e-15 | NA         | NA        |
| sigma_low     | 1.275e-01 | 2.403e+00 | 9.978e-03 | 2.237e-02  | 2.326e-01 |
| rsd_high      | 1.352e-01 | 8.217e+00 | 3.332e-11 | 1.046e-01  | 1.657e-01 |

FOCUS Chi2 error levels in percent:

|          | err.min | n.optim | df |
|----------|---------|---------|----|
| All data | 10.267  | 8       | 21 |
| DMTA     | 4.994   | 2       | 6  |
| M23      | 20.172  | 2       | 5  |
| M27      | 4.560   | 2       | 5  |
| M31      | 5.762   | 2       | 5  |

Resulting formation fractions:

|           | ff      |
|-----------|---------|
| DMTA_M23  | 0.13931 |
| DMTA_M27  | 0.06653 |
| DMTA_M31  | 0.09651 |
| DMTA_sink | 0.69764 |

Estimated disappearance times:

|      | DT50      | DT90      |
|------|-----------|-----------|
| DMTA | 3.309e+01 | 1.099e+02 |
| M23  | 1.411e+07 | 4.686e+07 |

M27 1.355e+04 4.501e+04  
M31 8.620e+01 2.863e+02

Data:

| time    | variable | observed | predicted | residual  |
|---------|----------|----------|-----------|-----------|
| 0.000   | DMTA     | 100.5    | 91.5481   | 8.951923  |
| 0.000   | DMTA     | 100.5    | 91.5481   | 8.951923  |
| 0.000   | DMTA     | 99.6     | 91.5481   | 8.051923  |
| 1.941   | DMTA     | 91.9     | 87.8997   | 4.000334  |
| 1.941   | DMTA     | 91.3     | 87.8997   | 3.400334  |
| 6.795   | DMTA     | 81.8     | 79.4021   | 2.397855  |
| 6.795   | DMTA     | 82.1     | 79.4021   | 2.697855  |
| 13.589  | DMTA     | 69.1     | 68.8676   | 0.232353  |
| 13.589  | DMTA     | 68.0     | 68.8676   | -0.867647 |
| 27.178  | DMTA     | 51.4     | 51.8061   | -0.406143 |
| 27.178  | DMTA     | 51.4     | 51.8061   | -0.406143 |
| 27.178  | DMTA     | 51.4     | 51.8061   | -0.406143 |
| 56.298  | DMTA     | 26.8     | 28.1482   | -1.348243 |
| 56.298  | DMTA     | 27.6     | 28.1482   | -0.548243 |
| 56.298  | DMTA     | 26.8     | 28.1482   | -1.348243 |
| 86.388  | DMTA     | 15.7     | 14.9862   | 0.713841  |
| 86.388  | DMTA     | 15.7     | 14.9862   | 0.713841  |
| 86.388  | DMTA     | 15.3     | 14.9862   | 0.313841  |
| 115.507 | DMTA     | 7.9      | 8.1425    | -0.242549 |
| 115.507 | DMTA     | 7.9      | 8.1425    | -0.242549 |
| 115.507 | DMTA     | 8.1      | 8.1425    | -0.042549 |
| 1.941   | M23      | 0.4      | 0.5083    | -0.108251 |
| 1.941   | M23      | 0.5      | 0.5083    | -0.008251 |
| 6.795   | M23      | 1.2      | 1.6920    | -0.492021 |
| 6.795   | M23      | 1.3      | 1.6920    | -0.392021 |
| 13.589  | M23      | 2.8      | 3.1596    | -0.359556 |
| 13.589  | M23      | 2.0      | 3.1596    | -1.159556 |
| 27.178  | M23      | 2.9      | 5.5364    | -2.636351 |
| 27.178  | M23      | 4.9      | 5.5364    | -0.636351 |
| 56.298  | M23      | 12.2     | 8.8321    | 3.367934  |
| 56.298  | M23      | 12.2     | 8.8321    | 3.367934  |
| 86.388  | M23      | 12.2     | 10.6656   | 1.534370  |
| 86.388  | M23      | 12.0     | 10.6656   | 1.334370  |
| 115.507 | M23      | 10.4     | 11.6190   | -1.218981 |
| 115.507 | M23      | 11.6     | 11.6190   | -0.018981 |
| 1.941   | M27      | 0.3      | 0.2427    | 0.057268  |
| 6.795   | M27      | 0.8      | 0.8080    | -0.007976 |
| 6.795   | M27      | 0.9      | 0.8080    | 0.092024  |
| 13.589  | M27      | 1.4      | 1.5085    | -0.108475 |
| 13.589  | M27      | 1.4      | 1.5085    | -0.108475 |
| 27.178  | M27      | 2.7      | 2.6422    | 0.057812  |
| 27.178  | M27      | 2.6      | 2.6422    | -0.042188 |
| 56.298  | M27      | 4.4      | 4.2110    | 0.188976  |
| 56.298  | M27      | 4.7      | 4.2110    | 0.488976  |
| 86.388  | M27      | 5.4      | 5.0795    | 0.320468  |
| 86.388  | M27      | 5.2      | 5.0795    | 0.120468  |
| 115.507 | M27      | 5.4      | 5.5269    | -0.126932 |
| 115.507 | M27      | 5.4      | 5.5269    | -0.126932 |
| 1.941   | M31      | 0.1      | 0.3494    | -0.249370 |
| 6.795   | M31      | 1.0      | 1.1401    | -0.140064 |
| 6.795   | M31      | 0.9      | 1.1401    | -0.240064 |
| 13.589  | M31      | 2.0      | 2.0683    | -0.068253 |
| 13.589  | M31      | 2.5      | 2.0683    | 0.431747  |
| 27.178  | M31      | 4.3      | 3.4100    | 0.889988  |
| 27.178  | M31      | 3.2      | 3.4100    | -0.210012 |
| 56.298  | M31      | 4.3      | 4.7098    | -0.409799 |
| 56.298  | M31      | 4.8      | 4.7098    | 0.090201  |
| 86.388  | M31      | 5.0      | 4.8117    | 0.188299  |
| 86.388  | M31      | 5.1      | 4.8117    | 0.288299  |
| 115.507 | M31      | 4.3      | 4.3891    | -0.089109 |
| 115.507 | M31      | 4.4      | 4.3891    | 0.010891  |

**Listing 49:** SFO-SFO3 fit to Elliot data, constant variance

```

mkin version used for fitting: 1.0.4.9000
R version used for fitting: 4.1.0
Date of fit: Mon Jul 26 14:04:08 2021
Date of summary: Mon Jul 26 18:52:54 2021

Equations:
d_DMTA/dt = - k_DMTA * DMTA
d_M23/dt = + f_DMTA_to_M23 * k_DMTA * DMTA - k_M23 * M23
d_M27/dt = + f_DMTA_to_M27 * k_DMTA * DMTA - k_M27 * M27
d_M31/dt = + f_DMTA_to_M31 * k_DMTA * DMTA - k_M31 * M31

Model predictions using solution type deSolve

Fitted using 1243 model solutions performed in 2.032 s

Error model: Constant variance

Error model algorithm: OLS

Starting values for parameters to be optimised:
      value type
DMTA_0    98.7000 state
k_DMTA     0.1000 deparm
k_M23      0.1001 deparm
k_M27      0.1002 deparm
k_M31      0.1003 deparm
f_DMTA_to_M23 0.2500 deparm
f_DMTA_to_M27 0.2500 deparm
f_DMTA_to_M31 0.2500 deparm

Starting values for the transformed parameters actually optimised:
      value lower upper
DMTA_0    98.700000 -Inf  Inf
log_k_DMTA -2.302585 -Inf  Inf
log_k_M23  -2.301586 -Inf  Inf
log_k_M27  -2.300587 -Inf  Inf
log_k_M31  -2.299590 -Inf  Inf
f_DMTA_ilr_1 0.000000 -Inf  Inf
f_DMTA_ilr_2 0.000000 -Inf  Inf
f_DMTA_ilr_3 0.000000 -Inf  Inf

Fixed parameter values:
      value type
M23_0     0 state
M27_0     0 state
M31_0     0 state

Results:
      AIC    BIC  logLik
769.5108 797.733 -375.7554

Optimised, transformed parameters with symmetric confidence intervals:
      Estimate Std. Error Lower Upper
DMTA_0    95.49000    0.75510 94.0000 96.9800
log_k_DMTA -2.83000    0.02114 -2.8720 -2.7890
log_k_M23  -3.87800    0.25590 -4.3830 -3.3720
log_k_M27  -5.20000    0.22160 -5.6380 -4.7630
log_k_M31  -4.56400    0.25000 -5.0580 -4.0710
f_DMTA_ilr_1 0.05617    0.10970 -0.1604 0.2727
f_DMTA_ilr_2 0.05249    0.10690 -0.1586 0.2635
f_DMTA_ilr_3 -1.43800    0.08860 -1.6130 -1.2630
sigma      2.20600    0.11970 1.9700 2.4430

Parameter correlation:

```

|              | DMTA_0       | log_k_DMTA   | log_k_M23    | log_k_M27  | log_k_M31  |
|--------------|--------------|--------------|--------------|------------|------------|
| DMTA_0       | 1.000e+00    | 5.528e-01    | -4.531e-02   | -4.386e-02 | -3.957e-02 |
| log_k_DMTA   | 5.528e-01    | 1.000e+00    | -8.197e-02   | -7.934e-02 | -7.159e-02 |
| log_k_M23    | -4.531e-02   | -8.197e-02   | 1.000e+00    | 6.504e-03  | 5.868e-03  |
| log_k_M27    | -4.386e-02   | -7.934e-02   | 6.504e-03    | 1.000e+00  | 5.680e-03  |
| log_k_M31    | -3.957e-02   | -7.159e-02   | 5.868e-03    | 5.680e-03  | 1.000e+00  |
| f_DMTA_ilr_1 | -2.207e-02   | -3.993e-02   | 7.251e-01    | -3.527e-01 | 2.859e-03  |
| f_DMTA_ilr_2 | -5.648e-03   | -1.022e-02   | 4.285e-01    | 2.116e-01  | -6.388e-01 |
| f_DMTA_ilr_3 | -2.188e-01   | -2.432e-01   | 6.056e-01    | 2.997e-01  | 4.391e-01  |
| sigma        | -7.964e-07   | -1.020e-06   | 6.888e-07    | 4.219e-07  | -4.683e-07 |
|              | f_DMTA_ilr_1 | f_DMTA_ilr_2 | f_DMTA_ilr_3 | sigma      |            |
| DMTA_0       | -2.207e-02   | -5.648e-03   | -2.188e-01   | -7.964e-07 |            |
| log_k_DMTA   | -3.993e-02   | -1.022e-02   | -2.432e-01   | -1.020e-06 |            |
| log_k_M23    | 7.251e-01    | 4.285e-01    | 6.056e-01    | 6.888e-07  |            |
| log_k_M27    | -3.527e-01   | 2.116e-01    | 2.997e-01    | 4.219e-07  |            |
| log_k_M31    | 2.859e-03    | -6.388e-01   | 4.391e-01    | -4.683e-07 |            |
| f_DMTA_ilr_1 | 1.000e+00    | 3.088e-01    | 4.377e-01    | 5.393e-07  |            |
| f_DMTA_ilr_2 | 3.088e-01    | 1.000e+00    | 5.082e-02    | 9.261e-07  |            |
| f_DMTA_ilr_3 | 4.377e-01    | 5.082e-02    | 1.000e+00    | 1.232e-06  |            |
| sigma        | 5.393e-07    | 9.261e-07    | 1.232e-06    | 1.000e+00  |            |

Backtransformed parameters:

Confidence intervals for internally transformed parameters are asymmetric.  
t-test (unrealistically) based on the assumption of normal distribution  
for estimators of untransformed parameters.

|               | Estimate  | t value | Pr(>t)     | Lower     | Upper     |
|---------------|-----------|---------|------------|-----------|-----------|
| DMTA_0        | 95.490000 | 126.500 | 2.417e-163 | 94.000000 | 96.980000 |
| k_DMTA        | 0.058990  | 47.290  | 1.228e-96  | 0.056580  | 0.061510  |
| k_M23         | 0.020700  | 3.907   | 6.855e-05  | 0.012480  | 0.034310  |
| k_M27         | 0.005514  | 4.513   | 6.136e-06  | 0.003560  | 0.008541  |
| k_M31         | 0.010420  | 4.000   | 4.826e-05  | 0.006357  | 0.017070  |
| f_DMTA_to_M23 | 0.128600  | 7.316   | 5.710e-12  | NA        | NA        |
| f_DMTA_to_M27 | 0.118800  | 12.950  | 4.815e-27  | NA        | NA        |
| f_DMTA_to_M31 | 0.115900  | 9.368   | 3.211e-17  | NA        | NA        |
| sigma         | 2.206000  | 18.440  | 7.804e-42  | 1.970000  | 2.443000  |

FOCUS Chi2 error levels in percent:

|          | err.min | n.optim | df |
|----------|---------|---------|----|
| All data | 12.960  | 8       | 35 |
| DMTA     | 7.787   | 2       | 10 |
| M23      | 12.157  | 2       | 8  |
| M27      | 6.578   | 2       | 8  |
| M31      | 15.721  | 2       | 9  |

Resulting formation fractions:

|           | ff     |
|-----------|--------|
| DMTA_M23  | 0.1286 |
| DMTA_M27  | 0.1188 |
| DMTA_M31  | 0.1159 |
| DMTA_sink | 0.6368 |

Estimated disappearance times:

|      | DT50   | DT90   |
|------|--------|--------|
| DMTA | 11.75  | 39.03  |
| M23  | 33.49  | 111.26 |
| M27  | 125.70 | 417.57 |
| M31  | 66.55  | 221.06 |

Data:

| time  | variable | observed | predicted | residual |
|-------|----------|----------|-----------|----------|
| 0.000 | DMTA     | 97.5     | 9.549e+01 | 2.01191  |
| 0.000 | DMTA     | 100.7    | 9.549e+01 | 5.21191  |
| 0.000 | DMTA     | 93.4     | 9.549e+01 | -2.08809 |
| 0.000 | DMTA     | 103.2    | 9.549e+01 | 7.71191  |
| 1.228 | DMTA     | 86.4     | 8.881e+01 | -2.41284 |
| 1.228 | DMTA     | 88.5     | 8.881e+01 | -0.31284 |
| 1.228 | DMTA     | 89.2     | 8.881e+01 | 0.38716  |
| 1.228 | DMTA     | 86.6     | 8.881e+01 | -2.21284 |
| 3.685 | DMTA     | 69.8     | 7.683e+01 | -7.02965 |



|         |      |      |           |          |
|---------|------|------|-----------|----------|
| 3.685   | DMTA | 77.1 | 7.683e+01 | 0.27035  |
| 3.685   | DMTA | 78.2 | 7.683e+01 | 1.37035  |
| 3.685   | DMTA | 78.1 | 7.683e+01 | 1.27035  |
| 8.599   | DMTA | 59.0 | 5.750e+01 | 1.50435  |
| 8.599   | DMTA | 54.2 | 5.750e+01 | -3.29565 |
| 8.599   | DMTA | 55.6 | 5.750e+01 | -1.89565 |
| 8.599   | DMTA | 53.0 | 5.750e+01 | -4.49565 |
| 17.199  | DMTA | 31.3 | 3.462e+01 | -3.31950 |
| 17.199  | DMTA | 33.5 | 3.462e+01 | -1.11950 |
| 17.199  | DMTA | 33.7 | 3.462e+01 | -0.91950 |
| 17.199  | DMTA | 33.2 | 3.462e+01 | -1.41950 |
| 25.798  | DMTA | 19.6 | 2.085e+01 | -1.24523 |
| 25.798  | DMTA | 20.9 | 2.085e+01 | 0.05477  |
| 25.798  | DMTA | 20.9 | 2.085e+01 | 0.05477  |
| 25.798  | DMTA | 19.9 | 2.085e+01 | -0.94523 |
| 34.397  | DMTA | 13.3 | 1.255e+01 | 0.74859  |
| 34.397  | DMTA | 15.8 | 1.255e+01 | 3.24859  |
| 34.397  | DMTA | 18.2 | 1.255e+01 | 5.64859  |
| 34.397  | DMTA | 12.7 | 1.255e+01 | 0.14859  |
| 51.596  | DMTA | 6.7  | 4.551e+00 | 2.14945  |
| 51.596  | DMTA | 8.7  | 4.551e+00 | 4.14945  |
| 51.596  | DMTA | 7.8  | 4.551e+00 | 3.24945  |
| 51.596  | DMTA | 9.0  | 4.551e+00 | 4.44945  |
| 68.795  | DMTA | 8.8  | 1.650e+00 | 7.15018  |
| 68.795  | DMTA | 8.7  | 1.650e+00 | 7.05018  |
| 68.795  | DMTA | 11.4 | 1.650e+00 | 9.75018  |
| 68.795  | DMTA | 9.0  | 1.650e+00 | 7.35018  |
| 103.192 | DMTA | 6.0  | 2.169e-01 | 5.78314  |
| 103.192 | DMTA | 4.4  | 2.169e-01 | 4.18314  |
| 103.192 | DMTA | 3.9  | 2.169e-01 | 3.68314  |
| 103.192 | DMTA | 4.4  | 2.169e-01 | 4.18314  |
| 146.189 | DMTA | 3.3  | 1.716e-02 | 3.28284  |
| 146.189 | DMTA | 2.8  | 1.716e-02 | 2.78284  |
| 146.189 | DMTA | 2.6  | 1.716e-02 | 2.58284  |
| 146.189 | DMTA | 3.4  | 1.716e-02 | 3.38284  |
| 223.583 | DMTA | 1.4  | 1.786e-04 | 1.39982  |
| 223.583 | DMTA | 1.8  | 1.786e-04 | 1.79982  |
| 223.583 | DMTA | 2.0  | 1.786e-04 | 1.99982  |
| 223.583 | DMTA | 1.7  | 1.786e-04 | 1.69982  |
| 3.685   | M23  | 2.8  | 2.307e+00 | 0.49322  |
| 3.685   | M23  | 1.7  | 2.307e+00 | -0.60678 |
| 3.685   | M23  | 2.6  | 2.307e+00 | 0.29322  |
| 3.685   | M23  | 2.4  | 2.307e+00 | 0.09322  |
| 8.599   | M23  | 4.3  | 4.442e+00 | -0.14175 |
| 8.599   | M23  | 5.8  | 4.442e+00 | 1.35825  |
| 8.599   | M23  | 5.5  | 4.442e+00 | 1.05825  |
| 8.599   | M23  | 5.6  | 4.442e+00 | 1.15825  |
| 17.199  | M23  | 8.2  | 6.392e+00 | 1.80790  |
| 17.199  | M23  | 5.2  | 6.392e+00 | -1.19210 |
| 17.199  | M23  | 7.3  | 6.392e+00 | 0.90790  |
| 17.199  | M23  | 6.5  | 6.392e+00 | 0.10790  |
| 25.798  | M23  | 5.1  | 6.960e+00 | -1.86037 |
| 25.798  | M23  | 6.1  | 6.960e+00 | -0.86037 |
| 25.798  | M23  | 5.8  | 6.960e+00 | -1.16037 |
| 25.798  | M23  | 7.7  | 6.960e+00 | 0.73963  |
| 34.397  | M23  | 6.0  | 6.795e+00 | -0.79526 |
| 34.397  | M23  | 6.0  | 6.795e+00 | -0.79526 |
| 34.397  | M23  | 7.8  | 6.795e+00 | 1.00474  |
| 34.397  | M23  | 7.3  | 6.795e+00 | 0.50474  |
| 51.596  | M23  | 5.0  | 5.600e+00 | -0.60042 |
| 51.596  | M23  | 4.2  | 5.600e+00 | -1.40042 |
| 51.596  | M23  | 7.0  | 5.600e+00 | 1.39958  |
| 51.596  | M23  | 6.3  | 5.600e+00 | 0.69958  |
| 68.795  | M23  | 3.9  | 4.228e+00 | -0.32782 |
| 68.795  | M23  | 2.9  | 4.228e+00 | -1.32782 |
| 68.795  | M23  | 4.3  | 4.228e+00 | 0.07218  |
| 68.795  | M23  | 3.8  | 4.228e+00 | -0.42782 |
| 103.192 | M23  | 1.9  | 2.192e+00 | -0.29212 |
| 103.192 | M23  | 1.5  | 2.192e+00 | -0.69212 |

|         |     |      |           |          |
|---------|-----|------|-----------|----------|
| 103.192 | M23 | 2.6  | 2.192e+00 | 0.40788  |
| 103.192 | M23 | 2.8  | 2.192e+00 | 0.60788  |
| 146.189 | M23 | 2.0  | 9.146e-01 | 1.08540  |
| 146.189 | M23 | 2.3  | 9.146e-01 | 1.38540  |
| 146.189 | M23 | 1.6  | 9.146e-01 | 0.68540  |
| 146.189 | M23 | 1.1  | 9.146e-01 | 0.18540  |
| 223.583 | M23 | 1.2  | 1.850e-01 | 1.01501  |
| 223.583 | M23 | 1.9  | 1.850e-01 | 1.71501  |
| 223.583 | M23 | 1.4  | 1.850e-01 | 1.21501  |
| 223.583 | M23 | 1.3  | 1.850e-01 | 1.11501  |
| 3.685   | M27 | 2.3  | 2.193e+00 | 0.10719  |
| 3.685   | M27 | 2.1  | 2.193e+00 | -0.09281 |
| 3.685   | M27 | 1.0  | 2.193e+00 | -1.19281 |
| 3.685   | M27 | 2.6  | 2.193e+00 | 0.40719  |
| 8.599   | M27 | 4.0  | 4.398e+00 | -0.39810 |
| 8.599   | M27 | 3.4  | 4.398e+00 | -0.99810 |
| 8.599   | M27 | 4.5  | 4.398e+00 | 0.10190  |
| 8.599   | M27 | 4.6  | 4.398e+00 | 0.20190  |
| 17.199  | M27 | 6.6  | 6.843e+00 | -0.24262 |
| 17.199  | M27 | 6.9  | 6.843e+00 | 0.05738  |
| 17.199  | M27 | 7.6  | 6.843e+00 | 0.75738  |
| 17.199  | M27 | 6.7  | 6.843e+00 | -0.14262 |
| 25.798  | M27 | 8.2  | 8.120e+00 | 0.07973  |
| 25.798  | M27 | 8.8  | 8.120e+00 | 0.67973  |
| 25.798  | M27 | 8.7  | 8.120e+00 | 0.57973  |
| 25.798  | M27 | 7.6  | 8.120e+00 | -0.52027 |
| 34.397  | M27 | 9.7  | 8.704e+00 | 0.99568  |
| 34.397  | M27 | 8.8  | 8.704e+00 | 0.09568  |
| 34.397  | M27 | 8.0  | 8.704e+00 | -0.70432 |
| 34.397  | M27 | 8.6  | 8.704e+00 | -0.10432 |
| 51.596  | M27 | 8.3  | 8.816e+00 | -0.51619 |
| 51.596  | M27 | 9.2  | 8.816e+00 | 0.38381  |
| 51.596  | M27 | 7.4  | 8.816e+00 | -1.41619 |
| 51.596  | M27 | 7.2  | 8.816e+00 | -1.61619 |
| 68.795  | M27 | 9.3  | 8.345e+00 | 0.95539  |
| 68.795  | M27 | 8.5  | 8.345e+00 | 0.15539  |
| 68.795  | M27 | 10.3 | 8.345e+00 | 1.95539  |
| 68.795  | M27 | 9.4  | 8.345e+00 | 1.05539  |
| 103.192 | M27 | 8.6  | 7.053e+00 | 1.54671  |
| 103.192 | M27 | 6.0  | 7.053e+00 | -1.05329 |
| 103.192 | M27 | 6.5  | 7.053e+00 | -0.55329 |
| 103.192 | M27 | 6.9  | 7.053e+00 | -0.15329 |
| 146.189 | M27 | 5.6  | 5.585e+00 | 0.01536  |
| 146.189 | M27 | 4.5  | 5.585e+00 | -1.08464 |
| 146.189 | M27 | 4.6  | 5.585e+00 | -0.98464 |
| 146.189 | M27 | 4.5  | 5.585e+00 | -1.08464 |
| 223.583 | M27 | 4.1  | 3.646e+00 | 0.45393  |
| 223.583 | M27 | 3.9  | 3.646e+00 | 0.25393  |
| 223.583 | M27 | 4.3  | 3.646e+00 | 0.65393  |
| 223.583 | M27 | 4.2  | 3.646e+00 | 0.55393  |
| 1.228   | M31 | 1.5  | 7.686e-01 | 0.73144  |
| 1.228   | M31 | 1.3  | 7.686e-01 | 0.53144  |
| 3.685   | M31 | 5.0  | 2.120e+00 | 2.88024  |
| 3.685   | M31 | 2.4  | 2.120e+00 | 0.28024  |
| 3.685   | M31 | 3.1  | 2.120e+00 | 0.98024  |
| 3.685   | M31 | 2.3  | 2.120e+00 | 0.18024  |
| 8.599   | M31 | 4.3  | 4.195e+00 | 0.10458  |
| 8.599   | M31 | 5.0  | 4.195e+00 | 0.80458  |
| 8.599   | M31 | 3.4  | 4.195e+00 | -0.79542 |
| 8.599   | M31 | 4.3  | 4.195e+00 | 0.10458  |
| 17.199  | M31 | 8.0  | 6.362e+00 | 1.63787  |
| 17.199  | M31 | 7.7  | 6.362e+00 | 1.33787  |
| 17.199  | M31 | 7.8  | 6.362e+00 | 1.43787  |
| 17.199  | M31 | 8.7  | 6.362e+00 | 2.33787  |
| 25.798  | M31 | 7.8  | 7.338e+00 | 0.46189  |
| 25.798  | M31 | 6.5  | 7.338e+00 | -0.83811 |
| 25.798  | M31 | 7.7  | 7.338e+00 | 0.36189  |
| 25.798  | M31 | 6.5  | 7.338e+00 | -0.83811 |
| 34.397  | M31 | 8.0  | 7.625e+00 | 0.37473  |

|         |     |     |           |          |
|---------|-----|-----|-----------|----------|
| 34.397  | M31 | 7.4 | 7.625e+00 | -0.22527 |
| 34.397  | M31 | 6.3 | 7.625e+00 | -1.32527 |
| 34.397  | M31 | 8.7 | 7.625e+00 | 1.07473  |
| 51.596  | M31 | 6.9 | 7.211e+00 | -0.31090 |
| 51.596  | M31 | 9.0 | 7.211e+00 | 1.78910  |
| 51.596  | M31 | 5.7 | 7.211e+00 | -1.51090 |
| 51.596  | M31 | 4.2 | 7.211e+00 | -3.01090 |
| 68.795  | M31 | 5.5 | 6.331e+00 | -0.83142 |
| 68.795  | M31 | 6.1 | 6.331e+00 | -0.23142 |
| 68.795  | M31 | 3.2 | 6.331e+00 | -3.13142 |
| 68.795  | M31 | 4.2 | 6.331e+00 | -2.13142 |
| 103.192 | M31 | 6.1 | 4.557e+00 | 1.54338  |
| 103.192 | M31 | 4.0 | 4.557e+00 | -0.55662 |
| 103.192 | M31 | 3.8 | 4.557e+00 | -0.75662 |
| 103.192 | M31 | 4.0 | 4.557e+00 | -0.55662 |
| 146.189 | M31 | 3.1 | 2.929e+00 | 0.17124  |
| 146.189 | M31 | 2.9 | 2.929e+00 | -0.02876 |
| 146.189 | M31 | 4.5 | 2.929e+00 | 1.57124  |
| 146.189 | M31 | 4.5 | 2.929e+00 | 1.57124  |
| 223.583 | M31 | 1.8 | 1.309e+00 | 0.49102  |
| 223.583 | M31 | 2.6 | 1.309e+00 | 1.29102  |
| 223.583 | M31 | 3.8 | 1.309e+00 | 2.49102  |
| 223.583 | M31 | 2.3 | 1.309e+00 | 0.99102  |

## Listing 50: SFO-SFO3 fit to Elliot data, two-component error

```

mkin version used for fitting: 1.0.4.9000
R version used for fitting: 4.1.0
Date of fit: Mon Jul 26 14:04:56 2021
Date of summary: Mon Jul 26 18:52:54 2021

Equations:
d_DMTA/dt = - k_DMTA * DMTA
d_M23/dt = + f_DMTA_to_M23 * k_DMTA * DMTA - k_M23 * M23
d_M27/dt = + f_DMTA_to_M27 * k_DMTA * DMTA - k_M27 * M27
d_M31/dt = + f_DMTA_to_M31 * k_DMTA * DMTA - k_M31 * M31

Model predictions using solution type deSolve

Fitted using 3410 model solutions performed in 5.549 s

Error model: Two-component variance function

Error model algorithm: d_3
Direct fitting and three-step fitting yield approximately the same likelihood

Starting values for parameters to be optimised:
      value  type
DMTA_0    98.7000 state
k_DMTA     0.1000 deparm
k_M23      0.1001 deparm
k_M27      0.1002 deparm
k_M31      0.1003 deparm
f_DMTA_to_M23 0.2500 deparm
f_DMTA_to_M27 0.2500 deparm
f_DMTA_to_M31 0.2500 deparm
sigma_low  0.1000 error
rsd_high   0.1000 error

Starting values for the transformed parameters actually optimised:
      value lower upper
DMTA_0    98.700000 -Inf  Inf
log_k_DMTA -2.302585 -Inf  Inf
log_k_M23  -2.301586 -Inf  Inf
log_k_M27  -2.300587 -Inf  Inf
log_k_M31  -2.299590 -Inf  Inf
f_DMTA_ilr_1 0.000000 -Inf  Inf
f_DMTA_ilr_2 0.000000 -Inf  Inf
f_DMTA_ilr_3 0.000000 -Inf  Inf
sigma_low   0.100000  0    Inf
rsd_high    0.100000  0    Inf

Fixed parameter values:
      value type
M23_0     0 state
M27_0     0 state
M31_0     0 state

Results:
      AIC      BIC    logLik
757.3693 788.7273 -368.6847

Optimised, transformed parameters with symmetric confidence intervals:
      Estimate Std. Error  Lower  Upper
DMTA_0    93.52000    1.57100  90.42000  96.62000
log_k_DMTA -2.88300    0.03270 -2.94700 -2.81800
log_k_M23  -3.82600    0.23020 -4.28100 -3.37100
log_k_M27  -5.15800    0.19600 -5.54500 -4.77000
log_k_M31  -4.52400    0.22420 -4.96600 -4.08100
f_DMTA_ilr_1 0.06767    0.10010 -0.13000  0.26540

```

```
f_DMTA_ilr_2 0.05545 0.09727 -0.13670 0.24760
f_DMTA_ilr_3 -1.37200 0.09231 -1.55400 -1.18900
sigma_low 1.95900 0.12060 1.72100 2.19800
rsd_high 0.04209 0.01209 0.01821 0.06596
```

Parameter correlation:

```
          DMTA_0 log_k_DMTA log_k_M23 log_k_M27 log_k_M31 f_DMTA_ilr_1
DMTA_0    1.00000  0.74504  -0.10742  -0.10323  -0.088680  -0.055278
log_k_DMTA 0.74504  1.00000  -0.14434  -0.13878  -0.120200  -0.074028
log_k_M23  -0.10742 -0.14434  1.00000  0.02003  0.017360  0.732900
log_k_M27  -0.10323 -0.13878  0.02003  1.00000  0.016698  -0.342086
log_k_M31  -0.08868 -0.12020  0.01736  0.01670  1.000000  0.008886
f_DMTA_ilr_1 -0.05528 -0.07403  0.73290  -0.34209  0.008886  1.000000
f_DMTA_ilr_2 -0.01394 -0.01855  0.43176  0.21192  -0.638078  0.312902
f_DMTA_ilr_3 -0.45868 -0.46491  0.59796  0.31410  0.434625  0.426137
sigma_low  0.25236  0.30520  -0.04360  -0.04171  -0.033409  -0.023061
rsd_high   -0.54569 -0.63206  0.09030  0.08638  0.069186  0.047761

          f_DMTA_ilr_2 f_DMTA_ilr_3 sigma_low rsd_high
DMTA_0    -0.013944  -0.45868  0.252360  -0.54569
log_k_DMTA -0.018545  -0.46491  0.305199  -0.63206
log_k_M23   0.431763   0.59796  -0.043601  0.09030
log_k_M27   0.211916   0.31410  -0.041710  0.08638
log_k_M31  -0.638078   0.43463  -0.033409  0.06919
f_DMTA_ilr_1 0.312902   0.42614  -0.023061  0.04776
f_DMTA_ilr_2 1.000000   0.05545  -0.006139  0.01271
f_DMTA_ilr_3 0.055455   1.00000  -0.147119  0.30467
sigma_low  -0.006139  -0.14712  1.000000  -0.29811
rsd_high    0.012711   0.30467  -0.298106  1.00000
```

Backtransformed parameters:

Confidence intervals for internally transformed parameters are asymmetric.  
t-test (unrealistically) based on the assumption of normal distribution  
for estimators of untransformed parameters.

```
          Estimate t value      Pr(>t)      Lower      Upper
DMTA_0    93.520000  59.530 2.187e-111 90.420000 96.620000
k_DMTA    0.055990  30.580 5.025e-69  0.052490 0.059730
k_M23     0.021800   4.343 1.241e-05  0.013840 0.034350
k_M27     0.005756   5.103 4.695e-07  0.003909 0.008476
k_M31     0.010850   4.461 7.669e-06  0.006968 0.016890
f_DMTA_to_M23 0.136200  7.743 5.205e-13      NA      NA
f_DMTA_to_M27 0.123800 13.470 2.036e-28      NA      NA
f_DMTA_to_M31 0.121300  9.913 1.169e-18      NA      NA
sigma_low  1.959000 16.240 5.657e-36  1.721000 2.198000
rsd_high   0.042090   3.482 3.214e-04  0.018210 0.065960
```

FOCUS Chi2 error levels in percent:

```
          err.min n.optim df
All data  13.396      8 35
DMTA      8.052       2 10
M23      12.524       2  8
M27       6.567       2  8
M31      16.338       2  9
```

Resulting formation fractions:

```
          ff
DMTA_M23  0.1362
DMTA_M27  0.1238
DMTA_M31  0.1213
DMTA_sink 0.6187
```

Estimated disappearance times:

```
          DT50  DT90
DMTA  12.38  41.12
M23   31.80 105.62
M27  120.42 400.03
M31   63.89 212.24
```

Data:

```
          time variable observed predicted residual
```

|         |      |       |           |          |
|---------|------|-------|-----------|----------|
| 0.000   | DMTA | 97.5  | 9.352e+01 | 3.97908  |
| 0.000   | DMTA | 100.7 | 9.352e+01 | 7.17908  |
| 0.000   | DMTA | 93.4  | 9.352e+01 | -0.12092 |
| 0.000   | DMTA | 103.2 | 9.352e+01 | 9.67908  |
| 1.228   | DMTA | 86.4  | 8.730e+01 | -0.90426 |
| 1.228   | DMTA | 88.5  | 8.730e+01 | 1.19574  |
| 1.228   | DMTA | 89.2  | 8.730e+01 | 1.89574  |
| 1.228   | DMTA | 86.6  | 8.730e+01 | -0.70426 |
| 3.685   | DMTA | 69.8  | 7.608e+01 | -6.28320 |
| 3.685   | DMTA | 77.1  | 7.608e+01 | 1.01680  |
| 3.685   | DMTA | 78.2  | 7.608e+01 | 2.11680  |
| 3.685   | DMTA | 78.1  | 7.608e+01 | 2.01680  |
| 8.599   | DMTA | 59.0  | 5.778e+01 | 1.21762  |
| 8.599   | DMTA | 54.2  | 5.778e+01 | -3.58238 |
| 8.599   | DMTA | 55.6  | 5.778e+01 | -2.18238 |
| 8.599   | DMTA | 53.0  | 5.778e+01 | -4.78238 |
| 17.199  | DMTA | 31.3  | 3.570e+01 | -4.40114 |
| 17.199  | DMTA | 33.5  | 3.570e+01 | -2.20114 |
| 17.199  | DMTA | 33.7  | 3.570e+01 | -2.00114 |
| 17.199  | DMTA | 33.2  | 3.570e+01 | -2.50114 |
| 25.798  | DMTA | 19.6  | 2.206e+01 | -2.45813 |
| 25.798  | DMTA | 20.9  | 2.206e+01 | -1.15813 |
| 25.798  | DMTA | 20.9  | 2.206e+01 | -1.15813 |
| 25.798  | DMTA | 19.9  | 2.206e+01 | -2.15813 |
| 34.397  | DMTA | 13.3  | 1.363e+01 | -0.32873 |
| 34.397  | DMTA | 15.8  | 1.363e+01 | 2.17127  |
| 34.397  | DMTA | 18.2  | 1.363e+01 | 4.57127  |
| 34.397  | DMTA | 12.7  | 1.363e+01 | -0.92873 |
| 51.596  | DMTA | 6.7   | 5.203e+00 | 1.49730  |
| 51.596  | DMTA | 8.7   | 5.203e+00 | 3.49730  |
| 51.596  | DMTA | 7.8   | 5.203e+00 | 2.59730  |
| 51.596  | DMTA | 9.0   | 5.203e+00 | 3.79730  |
| 68.795  | DMTA | 8.8   | 1.986e+00 | 6.81390  |
| 68.795  | DMTA | 8.7   | 1.986e+00 | 6.71390  |
| 68.795  | DMTA | 11.4  | 1.986e+00 | 9.41390  |
| 68.795  | DMTA | 9.0   | 1.986e+00 | 7.01390  |
| 103.192 | DMTA | 6.0   | 2.894e-01 | 5.71057  |
| 103.192 | DMTA | 4.4   | 2.894e-01 | 4.11057  |
| 103.192 | DMTA | 3.9   | 2.894e-01 | 3.61057  |
| 103.192 | DMTA | 4.4   | 2.894e-01 | 4.11057  |
| 146.189 | DMTA | 3.3   | 2.606e-02 | 3.27394  |
| 146.189 | DMTA | 2.8   | 2.606e-02 | 2.77394  |
| 146.189 | DMTA | 2.6   | 2.606e-02 | 2.57394  |
| 146.189 | DMTA | 3.4   | 2.606e-02 | 3.37394  |
| 223.583 | DMTA | 1.4   | 3.419e-04 | 1.39966  |
| 223.583 | DMTA | 1.8   | 3.419e-04 | 1.79966  |
| 223.583 | DMTA | 2.0   | 3.419e-04 | 1.99966  |
| 223.583 | DMTA | 1.7   | 3.419e-04 | 1.69966  |
| 3.685   | M23  | 2.8   | 2.279e+00 | 0.52100  |
| 3.685   | M23  | 1.7   | 2.279e+00 | -0.57900 |
| 3.685   | M23  | 2.6   | 2.279e+00 | 0.32100  |
| 3.685   | M23  | 2.4   | 2.279e+00 | 0.12100  |
| 8.599   | M23  | 4.3   | 4.405e+00 | -0.10544 |
| 8.599   | M23  | 5.8   | 4.405e+00 | 1.39456  |
| 8.599   | M23  | 5.5   | 4.405e+00 | 1.09456  |
| 8.599   | M23  | 5.6   | 4.405e+00 | 1.19456  |
| 17.199  | M23  | 8.2   | 6.374e+00 | 1.82571  |
| 17.199  | M23  | 5.2   | 6.374e+00 | -1.17429 |
| 17.199  | M23  | 7.3   | 6.374e+00 | 0.92571  |
| 17.199  | M23  | 6.5   | 6.374e+00 | 0.12571  |
| 25.798  | M23  | 5.1   | 6.966e+00 | -1.86640 |
| 25.798  | M23  | 6.1   | 6.966e+00 | -0.86640 |
| 25.798  | M23  | 5.8   | 6.966e+00 | -1.16640 |
| 25.798  | M23  | 7.7   | 6.966e+00 | 0.73360  |
| 34.397  | M23  | 6.0   | 6.815e+00 | -0.81462 |
| 34.397  | M23  | 6.0   | 6.815e+00 | -0.81462 |
| 34.397  | M23  | 7.8   | 6.815e+00 | 0.98538  |
| 34.397  | M23  | 7.3   | 6.815e+00 | 0.48538  |
| 51.596  | M23  | 5.0   | 5.613e+00 | -0.61285 |

|         |     |      |           |          |
|---------|-----|------|-----------|----------|
| 51.596  | M23 | 4.2  | 5.613e+00 | -1.41285 |
| 51.596  | M23 | 7.0  | 5.613e+00 | 1.38715  |
| 51.596  | M23 | 6.3  | 5.613e+00 | 0.68715  |
| 68.795  | M23 | 3.9  | 4.213e+00 | -0.31252 |
| 68.795  | M23 | 2.9  | 4.213e+00 | -1.31252 |
| 68.795  | M23 | 4.3  | 4.213e+00 | 0.08748  |
| 68.795  | M23 | 3.8  | 4.213e+00 | -0.41252 |
| 103.192 | M23 | 1.9  | 2.135e+00 | -0.23484 |
| 103.192 | M23 | 1.5  | 2.135e+00 | -0.63484 |
| 103.192 | M23 | 2.6  | 2.135e+00 | 0.46516  |
| 103.192 | M23 | 2.8  | 2.135e+00 | 0.66516  |
| 146.189 | M23 | 2.0  | 8.556e-01 | 1.14437  |
| 146.189 | M23 | 2.3  | 8.556e-01 | 1.44437  |
| 146.189 | M23 | 1.6  | 8.556e-01 | 0.74437  |
| 146.189 | M23 | 1.1  | 8.556e-01 | 0.24437  |
| 223.583 | M23 | 1.2  | 1.593e-01 | 1.04068  |
| 223.583 | M23 | 1.9  | 1.593e-01 | 1.74068  |
| 223.583 | M23 | 1.4  | 1.593e-01 | 1.24068  |
| 223.583 | M23 | 1.3  | 1.593e-01 | 1.14068  |
| 3.685   | M27 | 2.3  | 2.135e+00 | 0.16522  |
| 3.685   | M27 | 2.1  | 2.135e+00 | -0.03478 |
| 3.685   | M27 | 1.0  | 2.135e+00 | -1.13478 |
| 3.685   | M27 | 2.6  | 2.135e+00 | 0.46522  |
| 8.599   | M27 | 4.0  | 4.307e+00 | -0.30718 |
| 8.599   | M27 | 3.4  | 4.307e+00 | -0.90718 |
| 8.599   | M27 | 4.5  | 4.307e+00 | 0.19282  |
| 8.599   | M27 | 4.6  | 4.307e+00 | 0.29282  |
| 17.199  | M27 | 6.6  | 6.760e+00 | -0.16039 |
| 17.199  | M27 | 6.9  | 6.760e+00 | 0.13961  |
| 17.199  | M27 | 7.6  | 6.760e+00 | 0.83961  |
| 17.199  | M27 | 6.7  | 6.760e+00 | -0.06039 |
| 25.798  | M27 | 8.2  | 8.078e+00 | 0.12185  |
| 25.798  | M27 | 8.8  | 8.078e+00 | 0.72185  |
| 25.798  | M27 | 8.7  | 8.078e+00 | 0.62185  |
| 25.798  | M27 | 7.6  | 8.078e+00 | -0.47815 |
| 34.397  | M27 | 9.7  | 8.704e+00 | 0.99606  |
| 34.397  | M27 | 8.8  | 8.704e+00 | 0.09606  |
| 34.397  | M27 | 8.0  | 8.704e+00 | -0.70394 |
| 34.397  | M27 | 8.6  | 8.704e+00 | -0.10394 |
| 51.596  | M27 | 8.3  | 8.869e+00 | -0.56874 |
| 51.596  | M27 | 9.2  | 8.869e+00 | 0.33126  |
| 51.596  | M27 | 7.4  | 8.869e+00 | -1.46874 |
| 51.596  | M27 | 7.2  | 8.869e+00 | -1.66874 |
| 68.795  | M27 | 9.3  | 8.409e+00 | 0.89108  |
| 68.795  | M27 | 8.5  | 8.409e+00 | 0.09108  |
| 68.795  | M27 | 10.3 | 8.409e+00 | 1.89108  |
| 68.795  | M27 | 9.4  | 8.409e+00 | 0.99108  |
| 103.192 | M27 | 8.6  | 7.083e+00 | 1.51668  |
| 103.192 | M27 | 6.0  | 7.083e+00 | -1.08332 |
| 103.192 | M27 | 6.5  | 7.083e+00 | -0.58332 |
| 103.192 | M27 | 6.9  | 7.083e+00 | -0.18332 |
| 146.189 | M27 | 5.6  | 5.558e+00 | 0.04207  |
| 146.189 | M27 | 4.5  | 5.558e+00 | -1.05793 |
| 146.189 | M27 | 4.6  | 5.558e+00 | -0.95793 |
| 146.189 | M27 | 4.5  | 5.558e+00 | -1.05793 |
| 223.583 | M27 | 4.1  | 3.562e+00 | 0.53781  |
| 223.583 | M27 | 3.9  | 3.562e+00 | 0.33781  |
| 223.583 | M27 | 4.3  | 3.562e+00 | 0.73781  |
| 223.583 | M27 | 4.2  | 3.562e+00 | 0.63781  |
| 1.228   | M31 | 1.5  | 7.491e-01 | 0.75089  |
| 1.228   | M31 | 1.3  | 7.491e-01 | 0.55089  |
| 3.685   | M31 | 5.0  | 2.072e+00 | 2.92772  |
| 3.685   | M31 | 2.4  | 2.072e+00 | 0.32772  |
| 3.685   | M31 | 3.1  | 2.072e+00 | 1.02772  |
| 3.685   | M31 | 2.3  | 2.072e+00 | 0.22772  |
| 8.599   | M31 | 4.3  | 4.124e+00 | 0.17595  |
| 8.599   | M31 | 5.0  | 4.124e+00 | 0.87595  |
| 8.599   | M31 | 3.4  | 4.124e+00 | -0.72405 |
| 8.599   | M31 | 4.3  | 4.124e+00 | 0.17595  |

|         |     |     |           |          |
|---------|-----|-----|-----------|----------|
| 17.199  | M31 | 8.0 | 6.305e+00 | 1.69523  |
| 17.199  | M31 | 7.7 | 6.305e+00 | 1.39523  |
| 17.199  | M31 | 7.8 | 6.305e+00 | 1.49523  |
| 17.199  | M31 | 8.7 | 6.305e+00 | 2.39523  |
| 25.798  | M31 | 7.8 | 7.318e+00 | 0.48249  |
| 25.798  | M31 | 6.5 | 7.318e+00 | -0.81751 |
| 25.798  | M31 | 7.7 | 7.318e+00 | 0.38249  |
| 25.798  | M31 | 6.5 | 7.318e+00 | -0.81751 |
| 34.397  | M31 | 8.0 | 7.638e+00 | 0.36158  |
| 34.397  | M31 | 7.4 | 7.638e+00 | -0.23842 |
| 34.397  | M31 | 6.3 | 7.638e+00 | -1.33842 |
| 34.397  | M31 | 8.7 | 7.638e+00 | 1.06158  |
| 51.596  | M31 | 6.9 | 7.257e+00 | -0.35703 |
| 51.596  | M31 | 9.0 | 7.257e+00 | 1.74297  |
| 51.596  | M31 | 5.7 | 7.257e+00 | -1.55703 |
| 51.596  | M31 | 4.2 | 7.257e+00 | -3.05703 |
| 68.795  | M31 | 5.5 | 6.373e+00 | -0.87252 |
| 68.795  | M31 | 6.1 | 6.373e+00 | -0.27252 |
| 68.795  | M31 | 3.2 | 6.373e+00 | -3.17252 |
| 68.795  | M31 | 4.2 | 6.373e+00 | -2.17252 |
| 103.192 | M31 | 6.1 | 4.550e+00 | 1.55003  |
| 103.192 | M31 | 4.0 | 4.550e+00 | -0.54997 |
| 103.192 | M31 | 3.8 | 4.550e+00 | -0.74997 |
| 103.192 | M31 | 4.0 | 4.550e+00 | -0.54997 |
| 146.189 | M31 | 3.1 | 2.877e+00 | 0.22282  |
| 146.189 | M31 | 2.9 | 2.877e+00 | 0.02282  |
| 146.189 | M31 | 4.5 | 2.877e+00 | 1.62282  |
| 146.189 | M31 | 4.5 | 2.877e+00 | 1.62282  |
| 223.583 | M31 | 1.8 | 1.244e+00 | 0.55581  |
| 223.583 | M31 | 2.6 | 1.244e+00 | 1.35581  |
| 223.583 | M31 | 3.8 | 1.244e+00 | 2.55581  |
| 223.583 | M31 | 2.3 | 1.244e+00 | 1.05581  |



**Listing 51:** SFO-SFO3b fit to Calke data, constant variance

```

mkin version used for fitting: 1.0.4.9000
R version used for fitting: 4.1.0
Date of fit: Mon Jul 26 14:04:04 2021
Date of summary: Mon Jul 26 18:52:54 2021

Equations:
d_DMTA/dt = - k_DMTA * DMTA
d_M23/dt = + f_DMTA_to_M23 * k_DMTA * DMTA - k_M23 * M23
d_M27/dt = + f_DMTA_to_M27 * k_DMTA * DMTA - k_M27 * M27 + k_M31 * M31
d_M31/dt = + f_DMTA_to_M31 * k_DMTA * DMTA - k_M31 * M31

Model predictions using solution type deSolve

Fitted using 1081 model solutions performed in 1.778 s

Error model: Constant variance

Error model algorithm: OLS

Starting values for parameters to be optimised:
      value type
DMTA_0    97.2500 state
k_DMTA     0.1000 deparm
k_M23      0.1001 deparm
k_M27      0.1002 deparm
k_M31      0.1003 deparm
f_DMTA_to_M23 0.2500 deparm
f_DMTA_to_M27 0.2500 deparm
f_DMTA_to_M31 0.2500 deparm

Starting values for the transformed parameters actually optimised:
      value lower upper
DMTA_0    97.250000 -Inf  Inf
log_k_DMTA -2.302585 -Inf  Inf
log_k_M23  -2.301586 -Inf  Inf
log_k_M27  -2.300587 -Inf  Inf
log_k_M31  -2.299590 -Inf  Inf
f_DMTA_ilr_1 0.000000 -Inf  Inf
f_DMTA_ilr_2 0.000000 -Inf  Inf
f_DMTA_ilr_3 0.000000 -Inf  Inf

Fixed parameter values:
      value type
M23_0     0 state
M27_0     0 state
M31_0     0 state

Results:
      AIC      BIC    logLik
80.98565 90.80504 -31.49283

Optimised, transformed parameters with symmetric confidence intervals:
      Estimate Std. Error  Lower  Upper
DMTA_0    96.7300    0.69410 95.23000 98.230
log_k_DMTA -3.4760    0.02107 -3.52100 -3.430
log_k_M23  -4.5010    0.30710 -5.16500 -3.838
log_k_M27  -5.0670    1.04100 -7.31700 -2.818
log_k_M31  -4.6900    0.84320 -6.51200 -2.869
f_DMTA_ilr_1 0.7710    0.32120 0.07714 1.465
f_DMTA_ilr_2 0.3324    0.42400 -0.58360 1.248
f_DMTA_ilr_3 -2.2790    0.18220 -2.67200 -1.885
sigma      1.0130    0.15270 0.68280 1.342

Parameter correlation:

```

|              | DMTA_0       | log_k_DMTA   | log_k_M23    | log_k_M27  | log_k_M31  |
|--------------|--------------|--------------|--------------|------------|------------|
| DMTA_0       | 1.000e+00    | 4.272e-01    | -3.149e-02   | -1.712e-02 | -1.161e-02 |
| log_k_DMTA   | 4.272e-01    | 1.000e+00    | -7.371e-02   | -4.006e-02 | -2.717e-02 |
| log_k_M23    | -3.149e-02   | -7.371e-02   | 1.000e+00    | 2.953e-03  | 2.003e-03  |
| log_k_M27    | -1.712e-02   | -4.006e-02   | 2.953e-03    | 1.000e+00  | 6.680e-01  |
| log_k_M31    | -1.161e-02   | -2.717e-02   | 2.003e-03    | 6.680e-01  | 1.000e+00  |
| f_DMTA_ilr_1 | -3.135e-03   | -7.338e-03   | 3.054e-01    | -3.309e-01 | 2.813e-01  |
| f_DMTA_ilr_2 | 2.960e-04    | 6.928e-04    | 1.333e-01    | -3.856e-01 | -7.889e-01 |
| f_DMTA_ilr_3 | -7.930e-02   | -1.044e-01   | 3.208e-01    | 7.850e-01  | 4.096e-01  |
| sigma        | 3.833e-08    | 2.127e-08    | 1.500e-08    | -1.383e-08 | -5.403e-08 |
|              | f_DMTA_ilr_1 | f_DMTA_ilr_2 | f_DMTA_ilr_3 | sigma      |            |
| DMTA_0       | -3.135e-03   | 2.960e-04    | -7.930e-02   | 3.833e-08  |            |
| log_k_DMTA   | -7.338e-03   | 6.928e-04    | -1.044e-01   | 2.127e-08  |            |
| log_k_M23    | 3.054e-01    | 1.333e-01    | 3.208e-01    | 1.500e-08  |            |
| log_k_M27    | -3.309e-01   | -3.856e-01   | 7.850e-01    | -1.383e-08 |            |
| log_k_M31    | 2.813e-01    | -7.889e-01   | 4.096e-01    | -5.403e-08 |            |
| f_DMTA_ilr_1 | 1.000e+00    | -5.212e-01   | -3.752e-01   | -2.547e-08 |            |
| f_DMTA_ilr_2 | -5.212e-01   | 1.000e+00    | -1.506e-01   | 3.830e-08  |            |
| f_DMTA_ilr_3 | -3.752e-01   | -1.506e-01   | 1.000e+00    | 1.746e-08  |            |
| sigma        | -2.547e-08   | 3.830e-08    | 1.746e-08    | 1.000e+00  |            |

Backtransformed parameters:

Confidence intervals for internally transformed parameters are asymmetric.  
t-test (unrealistically) based on the assumption of normal distribution  
for estimators of untransformed parameters.

|               | Estimate  | t value  | Pr(>t)    | Lower     | Upper    |
|---------------|-----------|----------|-----------|-----------|----------|
| DMTA_0        | 96.730000 | 139.4000 | 2.515e-22 | 9.523e+01 | 98.23000 |
| k_DMTA        | 0.030940  | 47.4700  | 2.938e-16 | 2.957e-02 | 0.03238  |
| k_M23         | 0.011090  | 3.2560   | 3.128e-03 | 5.714e-03 | 0.02154  |
| k_M27         | 0.006298  | 0.9602   | 1.772e-01 | 6.639e-04 | 0.05975  |
| k_M31         | 0.009184  | 1.1860   | 1.284e-01 | 1.486e-03 | 0.05677  |
| f_DMTA_to_M23 | 0.114300  | 5.9190   | 2.539e-05 | NA        | NA       |
| f_DMTA_to_M27 | 0.038400  | 2.3670   | 1.706e-02 | NA        | NA       |
| f_DMTA_to_M31 | 0.044090  | 2.4220   | 1.540e-02 | NA        | NA       |
| sigma         | 1.013000  | 6.6330   | 8.148e-06 | 6.828e-01 | 1.34200  |

FOCUS Chi2 error levels in percent:

|          | err.min | n.optim | df |
|----------|---------|---------|----|
| All data | 5.721   | 8       | 9  |
| DMTA     | 2.809   | 2       | 3  |
| M23      | 5.049   | 2       | 2  |
| M27      | 3.391   | 2       | 2  |
| M31      | 14.017  | 2       | 2  |

Resulting formation fractions:

|           | ff      |
|-----------|---------|
| DMTA_M23  | 0.11426 |
| DMTA_M27  | 0.03840 |
| DMTA_M31  | 0.04409 |
| DMTA_sink | 0.80325 |

Estimated disappearance times:

|      | DT50   | DT90   |
|------|--------|--------|
| DMTA | 22.40  | 74.41  |
| M23  | 62.48  | 207.55 |
| M27  | 110.05 | 365.58 |
| M31  | 75.48  | 250.73 |

Data:

| time | variable | observed | predicted | residual |
|------|----------|----------|-----------|----------|
| 0    | DMTA     | 95.8     | 96.728    | -0.92789 |
| 0    | DMTA     | 98.7     | 96.728    | 1.97211  |
| 14   | DMTA     | 60.5     | 62.721    | -2.22134 |
| 30   | DMTA     | 39.1     | 38.230    | 0.87018  |
| 59   | DMTA     | 15.2     | 15.584    | -0.38444 |
| 120  | DMTA     | 4.8      | 2.360     | 2.43977  |
| 120  | DMTA     | 4.6      | 2.360     | 2.23977  |
| 14   | M23      | 4.1      | 3.579     | 0.52121  |
| 30   | M23      | 5.3      | 5.542     | -0.24214 |

|     |     |     |       |          |
|-----|-----|-----|-------|----------|
| 59  | M23 | 6.0 | 6.178 | -0.17774 |
| 120 | M23 | 4.3 | 4.130 | 0.16957  |
| 120 | M23 | 4.1 | 4.130 | -0.03043 |
| 14  | M27 | 1.5 | 1.342 | 0.15812  |
| 30  | M27 | 2.4 | 2.365 | 0.03519  |
| 59  | M27 | 3.2 | 3.354 | -0.15405 |
| 120 | M27 | 3.8 | 3.723 | 0.07690  |
| 120 | M27 | 3.7 | 3.723 | -0.02310 |
| 14  | M31 | 2.0 | 1.400 | 0.59963  |
| 30  | M31 | 2.1 | 2.207 | -0.10713 |
| 59  | M31 | 2.2 | 2.550 | -0.35043 |
| 120 | M31 | 1.8 | 1.867 | -0.06655 |
| 120 | M31 | 2.1 | 1.867 | 0.23345  |

**Listing 52:** SFO-SFO3b fit to Calke data, two-component error

```

mkin version used for fitting: 1.0.4.9000
R version used for fitting: 4.1.0
Date of fit: Mon Jul 26 14:04:43 2021
Date of summary: Mon Jul 26 18:52:54 2021

Equations:
d_DMTA/dt = - k_DMTA * DMTA
d_M23/dt = + f_DMTA_to_M23 * k_DMTA * DMTA - k_M23 * M23
d_M27/dt = + f_DMTA_to_M27 * k_DMTA * DMTA - k_M27 * M27 + k_M31 * M31
d_M31/dt = + f_DMTA_to_M31 * k_DMTA * DMTA - k_M31 * M31

Model predictions using solution type deSolve

Fitted using 2353 model solutions performed in 4.263 s

Error model: Two-component variance function

Error model algorithm: d_3
Direct fitting and three-step fitting yield approximately the same likelihood

Starting values for parameters to be optimised:
      value  type
DMTA_0    97.2500 state
k_DMTA     0.1000 deparm
k_M23      0.1001 deparm
k_M27      0.1002 deparm
k_M31      0.1003 deparm
f_DMTA_to_M23 0.2500 deparm
f_DMTA_to_M27 0.2500 deparm
f_DMTA_to_M31 0.2500 deparm
sigma_low  0.1000 error
rsd_high   0.1000 error

Starting values for the transformed parameters actually optimised:
      value lower upper
DMTA_0    97.250000 -Inf  Inf
log_k_DMTA -2.302585 -Inf  Inf
log_k_M23  -2.301586 -Inf  Inf
log_k_M27  -2.300587 -Inf  Inf
log_k_M31  -2.299590 -Inf  Inf
f_DMTA_ilr_1 0.000000 -Inf  Inf
f_DMTA_ilr_2 0.000000 -Inf  Inf
f_DMTA_ilr_3 0.000000 -Inf  Inf
sigma_low   0.100000  0    Inf
rsd_high    0.100000  0    Inf

Fixed parameter values:
      value  type
M23_0     0 state
M27_0     0 state
M31_0     0 state

Results:
      AIC    BIC   logLik
77.87317 88.7836 -28.93659

Optimised, transformed parameters with symmetric confidence intervals:
      Estimate Std. Error   Lower   Upper
DMTA_0    95.43000    1.94300 91.200000 99.67000
log_k_DMTA -3.51300    0.03802 -3.596000 -3.43000
log_k_M23  -4.46000    0.23000 -4.961000 -3.95900
log_k_M27  -4.99400    0.73510 -6.595000 -3.39200
log_k_M31  -4.64900    0.61600 -5.991000 -3.30700
f_DMTA_ilr_1 0.77590    0.24270  0.247200  1.30500

```

```
f_DMTA_ilr_2 0.33180 0.31900 -0.363200 1.02700
f_DMTA_ilr_3 -2.23600 0.14530 -2.552000 -1.91900
sigma_low 0.75300 0.14440 0.438400 1.06800
rsd_high 0.02493 0.01514 -0.008056 0.05792
```

Parameter correlation:

```
          DMTA_0 log_k_DMTA log_k_M23 log_k_M27 log_k_M31 f_DMTA_ilr_1
DMTA_0    1.000000 0.754553 -0.13769 -0.07567 -0.05165 -0.01590
log_k_DMTA 0.754553 1.000000 -0.18209 -0.10011 -0.06833 -0.02088
log_k_M23 -0.137689 -0.182089 1.000000 0.01824 0.01245 0.30622
log_k_M27 -0.075673 -0.100108 0.01824 1.000000 0.66510 -0.32435
log_k_M31 -0.051646 -0.068327 0.01245 0.66510 1.000000 0.28761
f_DMTA_ilr_1 -0.015899 -0.020880 0.30622 -0.32435 0.28761 1.000000
f_DMTA_ilr_2 0.001622 0.002137 0.13244 -0.38207 -0.78866 -0.52501
f_DMTA_ilr_3 -0.306291 -0.318703 0.35709 0.76633 0.40094 -0.34538
sigma_low 0.360695 0.451173 -0.08406 -0.04605 -0.03141 -0.01036
rsd_high -0.578659 -0.706765 0.13168 0.07214 0.04921 0.01623
          f_DMTA_ilr_2 f_DMTA_ilr_3 sigma_low rsd_high
DMTA_0    0.001622 -0.3063 0.360695 -0.578659
log_k_DMTA 0.002137 -0.3187 0.451173 -0.706765
log_k_M23 0.132440 0.3571 -0.084059 0.131680
log_k_M27 -0.382073 0.7663 -0.046053 0.072143
log_k_M31 -0.788663 0.4009 -0.031411 0.049207
f_DMTA_ilr_1 -0.525014 -0.3454 -0.010358 0.016226
f_DMTA_ilr_2 1.000000 -0.1342 0.001028 -0.001611
f_DMTA_ilr_3 -0.134219 1.0000 -0.148543 0.232692
sigma_low 0.001028 -0.1485 1.000000 -0.403331
rsd_high -0.001611 0.2327 -0.403331 1.000000
```

Backtransformed parameters:

Confidence intervals for internally transformed parameters are asymmetric.  
t-test (unrealistically) based on the assumption of normal distribution  
for estimators of untransformed parameters.

|               | Estimate  | t value | Pr(>t)    | Lower     | Upper    |
|---------------|-----------|---------|-----------|-----------|----------|
| DMTA_0        | 95.430000 | 49.120  | 1.661e-15 | 91.200000 | 99.67000 |
| k_DMTA        | 0.029810  | 26.300  | 2.790e-12 | 0.027440  | 0.03239  |
| k_M23         | 0.011560  | 4.348   | 4.737e-04 | 0.007004  | 0.01908  |
| k_M27         | 0.006780  | 1.360   | 9.937e-02 | 0.001367  | 0.03364  |
| k_M31         | 0.009571  | 1.623   | 6.524e-02 | 0.002501  | 0.03663  |
| f_DMTA_to_M23 | 0.119200  | 7.363   | 4.348e-06 | NA        | NA       |
| f_DMTA_to_M27 | 0.039800  | 3.113   | 4.484e-03 | NA        | NA       |
| f_DMTA_to_M31 | 0.045880  | 3.203   | 3.795e-03 | NA        | NA       |
| sigma_low     | 0.753000  | 5.215   | 1.082e-04 | 0.438400  | 1.06800  |
| rsd_high      | 0.024930  | 1.647   | 6.277e-02 | -0.008056 | 0.05792  |

FOCUS Chi2 error levels in percent:

|          | err.min | n.optim | df |
|----------|---------|---------|----|
| All data | 6.379   | 8       | 9  |
| DMTA     | 3.152   | 2       | 3  |
| M23      | 5.196   | 2       | 2  |
| M27      | 3.631   | 2       | 2  |
| M31      | 14.205  | 2       | 2  |

Resulting formation fractions:

```
ff
DMTA_M23 0.11923
DMTA_M27 0.03980
DMTA_M31 0.04588
DMTA_sink 0.79509
```

Estimated disappearance times:

|      | DT50   | DT90   |
|------|--------|--------|
| DMTA | 23.25  | 77.24  |
| M23  | 59.96  | 199.19 |
| M27  | 102.23 | 339.60 |
| M31  | 72.42  | 240.58 |

Data:

```
time variable observed predicted residual
```

|     |      |      |        |          |
|-----|------|------|--------|----------|
| 0   | DMTA | 95.8 | 95.432 | 0.36766  |
| 0   | DMTA | 98.7 | 95.432 | 3.26766  |
| 14  | DMTA | 60.5 | 62.869 | -2.36919 |
| 30  | DMTA | 39.1 | 39.020 | 0.08009  |
| 59  | DMTA | 15.2 | 16.437 | -1.23705 |
| 120 | DMTA | 4.8  | 2.667  | 2.13278  |
| 120 | DMTA | 4.6  | 2.667  | 1.93278  |
| 14  | M23  | 4.1  | 3.564  | 0.53550  |
| 30  | M23  | 5.3  | 5.540  | -0.23968 |
| 59  | M23  | 6.0  | 6.195  | -0.19532 |
| 120 | M23  | 4.3  | 4.123  | 0.17725  |
| 120 | M23  | 4.1  | 4.123  | -0.02275 |
| 14  | M27  | 1.5  | 1.331  | 0.16883  |
| 30  | M27  | 2.4  | 2.360  | 0.04046  |
| 59  | M27  | 3.2  | 3.364  | -0.16424 |
| 120 | M27  | 3.8  | 3.718  | 0.08158  |
| 120 | M27  | 3.7  | 3.718  | -0.01842 |
| 14  | M31  | 2.0  | 1.392  | 0.60822  |
| 30  | M31  | 2.1  | 2.203  | -0.10260 |
| 59  | M31  | 2.2  | 2.556  | -0.35576 |
| 120 | M31  | 1.8  | 1.865  | -0.06480 |
| 120 | M31  | 2.1  | 1.865  | 0.23520  |

**Listing 53:** SFO-SFO3b fit to Flaach data, constant variance

```

mkin version used for fitting: 1.0.4.9000
R version used for fitting: 4.1.0
Date of fit: Mon Jul 26 14:04:04 2021
Date of summary: Mon Jul 26 18:52:54 2021

Equations:
d_DMTA/dt = - k_DMTA * DMTA
d_M23/dt = + f_DMTA_to_M23 * k_DMTA * DMTA - k_M23 * M23
d_M27/dt = + f_DMTA_to_M27 * k_DMTA * DMTA - k_M27 * M27 + k_M31 * M31
d_M31/dt = + f_DMTA_to_M31 * k_DMTA * DMTA - k_M31 * M31

Model predictions using solution type deSolve

Fitted using 1126 model solutions performed in 2.121 s

Error model: Constant variance

Error model algorithm: OLS

Starting values for parameters to be optimised:
      value  type
DMTA_0    96.76667 state
k_DMTA     0.10000 deparm
k_M23      0.10010 deparm
k_M27      0.10020 deparm
k_M31      0.10030 deparm
f_DMTA_to_M23 0.25000 deparm
f_DMTA_to_M27 0.25000 deparm
f_DMTA_to_M31 0.25000 deparm

Starting values for the transformed parameters actually optimised:
      value lower upper
DMTA_0    96.76667 -Inf  Inf
log_k_DMTA -2.302585 -Inf  Inf
log_k_M23  -2.301586 -Inf  Inf
log_k_M27  -2.300587 -Inf  Inf
log_k_M31  -2.299590 -Inf  Inf
f_DMTA_ilr_1 0.000000 -Inf  Inf
f_DMTA_ilr_2 0.000000 -Inf  Inf
f_DMTA_ilr_3 0.000000 -Inf  Inf

Fixed parameter values:
      value  type
M23_0     0 state
M27_0     0 state
M31_0     0 state

Results:
      AIC      BIC    logLik
318.2829 344.4304 -150.1414

Optimised, transformed parameters with symmetric confidence intervals:
      Estimate Std. Error Lower Upper
DMTA_0    95.10000    0.298300 94.5100 95.69000
log_k_DMTA -1.93700    0.008113 -1.9530 -1.92100
log_k_M23  -3.07500    0.071230 -3.2160 -2.93400
log_k_M27  -3.39200    0.066450 -3.5240 -3.26100
log_k_M31  -3.52100    0.194800 -3.9060 -3.13500
f_DMTA_ilr_1 -0.02625    0.040390 -0.1062  0.05368
f_DMTA_ilr_2  0.91680    0.092750  0.7332  1.10000
f_DMTA_ilr_3 -1.76800    0.042410 -1.8520 -1.68400
sigma      0.73580    0.044780  0.6472  0.82440

Parameter correlation:

```

|              | DMTA_0       | log_k_DMTA   | log_k_M23    | log_k_M27  | log_k_M31  |
|--------------|--------------|--------------|--------------|------------|------------|
| DMTA_0       | 1.000e+00    | 5.286e-01    | -4.614e-02   | -4.740e-02 | -9.368e-03 |
| log_k_DMTA   | 5.286e-01    | 1.000e+00    | -8.728e-02   | -8.967e-02 | -1.772e-02 |
| log_k_M23    | -4.614e-02   | -8.728e-02   | 1.000e+00    | 7.826e-03  | 1.547e-03  |
| log_k_M27    | -4.740e-02   | -8.967e-02   | 7.826e-03    | 1.000e+00  | 5.078e-01  |
| log_k_M31    | -9.368e-03   | -1.772e-02   | 1.547e-03    | 5.078e-01  | 1.000e+00  |
| f_DMTA_ilr_1 | -7.441e-03   | -1.408e-02   | 5.852e-01    | -2.794e-01 | 1.694e-01  |
| f_DMTA_ilr_2 | -6.676e-03   | -1.263e-02   | 1.479e-01    | -4.472e-01 | -7.403e-01 |
| f_DMTA_ilr_3 | -1.574e-01   | -1.720e-01   | 3.682e-01    | 6.626e-01  | 5.383e-01  |
| sigma        | -2.787e-07   | -4.153e-07   | 7.844e-08    | -9.437e-08 | 3.592e-07  |
|              | f_DMTA_ilr_1 | f_DMTA_ilr_2 | f_DMTA_ilr_3 | sigma      |            |
| DMTA_0       | -7.441e-03   | -6.676e-03   | -1.574e-01   | -2.787e-07 |            |
| log_k_DMTA   | -1.408e-02   | -1.263e-02   | -1.720e-01   | -4.153e-07 |            |
| log_k_M23    | 5.852e-01    | 1.479e-01    | 3.682e-01    | 7.844e-08  |            |
| log_k_M27    | -2.794e-01   | -4.472e-01   | 6.626e-01    | -9.437e-08 |            |
| log_k_M31    | 1.694e-01    | -7.403e-01   | 5.383e-01    | 3.592e-07  |            |
| f_DMTA_ilr_1 | 1.000e+00    | -7.649e-02   | 2.245e-01    | 3.131e-07  |            |
| f_DMTA_ilr_2 | -7.649e-02   | 1.000e+00    | -5.984e-01   | -1.947e-07 |            |
| f_DMTA_ilr_3 | 2.245e-01    | -5.984e-01   | 1.000e+00    | 1.334e-07  |            |
| sigma        | 3.131e-07    | -1.947e-07   | 1.334e-07    | 1.000e+00  |            |

Backtransformed parameters:

Confidence intervals for internally transformed parameters are asymmetric.  
t-test (unrealistically) based on the assumption of normal distribution  
for estimators of untransformed parameters.

|               | Estimate | t value | Pr(>t)     | Lower    | Upper    |
|---------------|----------|---------|------------|----------|----------|
| DMTA_0        | 95.10000 | 318.800 | 2.532e-185 | 94.51000 | 95.69000 |
| k_DMTA        | 0.14410  | 123.300 | 1.613e-133 | 0.14180  | 0.14650  |
| k_M23         | 0.04617  | 14.040  | 7.764e-28  | 0.04010  | 0.05316  |
| k_M27         | 0.03363  | 15.050  | 3.144e-30  | 0.02949  | 0.03836  |
| k_M31         | 0.02958  | 5.133   | 5.266e-07  | 0.02012  | 0.04350  |
| f_DMTA_to_M23 | 0.12870  | 22.440  | 3.813e-46  | NA       | NA       |
| f_DMTA_to_M27 | 0.13360  | 27.020  | 1.424e-54  | NA       | NA       |
| f_DMTA_to_M31 | 0.04267  | 9.401   | 1.571e-16  | NA       | NA       |
| sigma         | 0.73580  | 16.430  | 1.995e-33  | 0.64720  | 0.82440  |

FOCUS Chi2 error levels in percent:

|          | err.min | n.optim | df |
|----------|---------|---------|----|
| All data | 4.704   | 8       | 37 |
| DMTA     | 2.109   | 2       | 10 |
| M23      | 11.578  | 2       | 9  |
| M27      | 4.440   | 2       | 9  |
| M31      | 19.486  | 2       | 9  |

Resulting formation fractions:

|           | ff      |
|-----------|---------|
| DMTA_M23  | 0.12872 |
| DMTA_M27  | 0.13359 |
| DMTA_M31  | 0.04267 |
| DMTA_sink | 0.69502 |

Estimated disappearance times:

|      | DT50   | DT90  |
|------|--------|-------|
| DMTA | 4.809  | 15.98 |
| M23  | 15.012 | 49.87 |
| M27  | 20.610 | 68.47 |
| M31  | 23.432 | 77.84 |

Data:

| time   | variable | observed | predicted | residual  |
|--------|----------|----------|-----------|-----------|
| 0.0000 | DMTA     | 96.5     | 95.096869 | 1.403131  |
| 0.0000 | DMTA     | 96.8     | 95.096869 | 1.703131  |
| 0.0000 | DMTA     | 97.0     | 95.096869 | 1.903131  |
| 0.6234 | DMTA     | 82.9     | 86.924965 | -4.024965 |
| 0.6234 | DMTA     | 86.7     | 86.924965 | -0.224965 |
| 0.6234 | DMTA     | 87.4     | 86.924965 | 0.475035  |
| 1.8702 | DMTA     | 72.8     | 72.627508 | 0.172492  |
| 1.8702 | DMTA     | 69.9     | 72.627508 | -2.727508 |
| 1.8702 | DMTA     | 71.9     | 72.627508 | -0.727508 |



|         |      |      |           |           |
|---------|------|------|-----------|-----------|
| 4.3637  | DMTA | 51.4 | 50.700749 | 0.699251  |
| 4.3637  | DMTA | 52.9 | 50.700749 | 2.199251  |
| 4.3637  | DMTA | 48.6 | 50.700749 | -2.100749 |
| 8.7274  | DMTA | 28.5 | 27.031027 | 1.468973  |
| 8.7274  | DMTA | 27.3 | 27.031027 | 0.268973  |
| 8.7274  | DMTA | 27.5 | 27.031027 | 0.468973  |
| 13.0911 | DMTA | 14.8 | 14.411550 | 0.388450  |
| 13.0911 | DMTA | 13.4 | 14.411550 | -1.011550 |
| 13.0911 | DMTA | 14.4 | 14.411550 | -0.011550 |
| 17.4548 | DMTA | 7.7  | 7.683496  | 0.016504  |
| 17.4548 | DMTA | 7.3  | 7.683496  | -0.383496 |
| 17.4548 | DMTA | 8.1  | 7.683496  | 0.416504  |
| 26.1822 | DMTA | 2.0  | 2.184013  | -0.184013 |
| 26.1822 | DMTA | 1.5  | 2.184013  | -0.684013 |
| 26.1822 | DMTA | 1.9  | 2.184013  | -0.284013 |
| 34.9096 | DMTA | 1.3  | 0.620800  | 0.679200  |
| 34.9096 | DMTA | 1.0  | 0.620800  | 0.379200  |
| 34.9096 | DMTA | 1.1  | 0.620800  | 0.479200  |
| 43.6370 | DMTA | 0.9  | 0.176461  | 0.723539  |
| 43.6370 | DMTA | 0.7  | 0.176461  | 0.523539  |
| 43.6370 | DMTA | 0.7  | 0.176461  | 0.523539  |
| 52.3644 | DMTA | 0.6  | 0.050158  | 0.549842  |
| 52.3644 | DMTA | 0.4  | 0.050158  | 0.349842  |
| 52.3644 | DMTA | 0.5  | 0.050158  | 0.449842  |
| 74.8063 | DMTA | 0.4  | 0.001975  | 0.398025  |
| 74.8063 | DMTA | 0.3  | 0.001975  | 0.298025  |
| 74.8063 | DMTA | 0.3  | 0.001975  | 0.298025  |
| 0.6234  | M23  | 0.7  | 1.036677  | -0.336677 |
| 0.6234  | M23  | 0.7  | 1.036677  | -0.336677 |
| 0.6234  | M23  | 0.2  | 1.036677  | -0.836677 |
| 1.8702  | M23  | 2.2  | 2.765551  | -0.565551 |
| 1.8702  | M23  | 1.8  | 2.765551  | -0.965551 |
| 1.8702  | M23  | 1.6  | 2.765551  | -1.165551 |
| 4.3637  | M23  | 4.1  | 5.121625  | -1.021625 |
| 4.3637  | M23  | 4.2  | 5.121625  | -0.921625 |
| 4.3637  | M23  | 4.2  | 5.121625  | -0.921625 |
| 8.7274  | M23  | 7.5  | 6.917574  | 0.582426  |
| 8.7274  | M23  | 7.1  | 6.917574  | 0.182426  |
| 8.7274  | M23  | 7.5  | 6.917574  | 0.582426  |
| 13.0911 | M23  | 8.4  | 7.111004  | 1.288996  |
| 13.0911 | M23  | 6.8  | 7.111004  | -0.311004 |
| 13.0911 | M23  | 8.0  | 7.111004  | 0.888996  |
| 17.4548 | M23  | 7.2  | 6.589489  | 0.610511  |
| 17.4548 | M23  | 7.2  | 6.589489  | 0.610511  |
| 17.4548 | M23  | 6.9  | 6.589489  | 0.310511  |
| 26.1822 | M23  | 4.9  | 4.962837  | -0.062837 |
| 26.1822 | M23  | 4.3  | 4.962837  | -0.662837 |
| 26.1822 | M23  | 4.5  | 4.962837  | -0.462837 |
| 34.9096 | M23  | 3.8  | 3.475659  | 0.324341  |
| 34.9096 | M23  | 3.1  | 3.475659  | -0.375659 |
| 34.9096 | M23  | 3.1  | 3.475659  | -0.375659 |
| 43.6370 | M23  | 2.7  | 2.368028  | 0.331972  |
| 43.6370 | M23  | 2.3  | 2.368028  | -0.068028 |
| 43.6370 | M23  | 2.1  | 2.368028  | -0.268028 |
| 52.3644 | M23  | 1.6  | 1.595449  | 0.004551  |
| 52.3644 | M23  | 1.1  | 1.595449  | -0.495449 |
| 52.3644 | M23  | 1.3  | 1.595449  | -0.295449 |
| 74.8063 | M23  | 0.4  | 0.569042  | -0.169042 |
| 74.8063 | M23  | 0.4  | 0.569042  | -0.169042 |
| 74.8063 | M23  | 0.3  | 0.569042  | -0.269042 |
| 0.6234  | M27  | 1.1  | 1.083369  | 0.016631  |
| 0.6234  | M27  | 1.1  | 1.083369  | 0.016631  |
| 0.6234  | M27  | 0.3  | 1.083369  | -0.783369 |
| 1.8702  | M27  | 2.6  | 2.931742  | -0.331742 |
| 1.8702  | M27  | 2.4  | 2.931742  | -0.531742 |
| 1.8702  | M27  | 2.3  | 2.931742  | -0.631742 |
| 4.3637  | M27  | 5.0  | 5.596752  | -0.596752 |
| 4.3637  | M27  | 5.9  | 5.596752  | 0.303248  |
| 4.3637  | M27  | 4.8  | 5.596752  | -0.796752 |

|         |     |     |          |           |
|---------|-----|-----|----------|-----------|
| 8.7274  | M27 | 8.5 | 8.015213 | 0.484787  |
| 8.7274  | M27 | 8.5 | 8.015213 | 0.484787  |
| 8.7274  | M27 | 8.3 | 8.015213 | 0.284787  |
| 13.0911 | M27 | 9.3 | 8.792315 | 0.507685  |
| 13.0911 | M27 | 8.7 | 8.792315 | -0.092315 |
| 13.0911 | M27 | 9.1 | 8.792315 | 0.307685  |
| 17.4548 | M27 | 8.6 | 8.743129 | -0.143129 |
| 17.4548 | M27 | 8.5 | 8.743129 | -0.243129 |
| 17.4548 | M27 | 8.9 | 8.743129 | 0.156871  |
| 26.1822 | M27 | 8.1 | 7.682888 | 0.417112  |
| 26.1822 | M27 | 7.7 | 7.682888 | 0.017112  |
| 26.1822 | M27 | 7.4 | 7.682888 | -0.282888 |
| 34.9096 | M27 | 5.9 | 6.350843 | -0.450843 |
| 34.9096 | M27 | 6.0 | 6.350843 | -0.350843 |
| 34.9096 | M27 | 5.9 | 6.350843 | -0.450843 |
| 43.6370 | M27 | 5.6 | 5.137395 | 0.462605  |
| 43.6370 | M27 | 5.2 | 5.137395 | 0.062605  |
| 43.6370 | M27 | 5.6 | 5.137395 | 0.462605  |
| 52.3644 | M27 | 4.3 | 4.118784 | 0.181216  |
| 52.3644 | M27 | 3.7 | 4.118784 | -0.418784 |
| 52.3644 | M27 | 3.9 | 4.118784 | -0.218784 |
| 74.8063 | M27 | 2.5 | 2.294183 | 0.205817  |
| 74.8063 | M27 | 2.4 | 2.294183 | 0.105817  |
| 74.8063 | M27 | 2.2 | 2.294183 | -0.094183 |
| 0.6234  | M31 | 0.3 | 0.345424 | -0.045424 |
| 0.6234  | M31 | 0.3 | 0.345424 | -0.045424 |
| 0.6234  | M31 | 0.1 | 0.345424 | -0.245424 |
| 1.8702  | M31 | 0.7 | 0.931497 | -0.231497 |
| 1.8702  | M31 | 0.6 | 0.931497 | -0.331497 |
| 1.8702  | M31 | 0.7 | 0.931497 | -0.231497 |
| 4.3637  | M31 | 1.3 | 1.765142 | -0.465142 |
| 4.3637  | M31 | 1.2 | 1.765142 | -0.565142 |
| 4.3637  | M31 | 1.4 | 1.765142 | -0.365142 |
| 8.7274  | M31 | 2.4 | 2.492466 | -0.092466 |
| 8.7274  | M31 | 2.1 | 2.492466 | -0.392466 |
| 8.7274  | M31 | 2.3 | 2.492466 | -0.192466 |
| 13.0911 | M31 | 3.3 | 2.692365 | 0.607635  |
| 13.0911 | M31 | 2.4 | 2.692365 | -0.292365 |
| 13.0911 | M31 | 2.6 | 2.692365 | -0.092365 |
| 17.4548 | M31 | 4.0 | 2.633819 | 1.366181  |
| 17.4548 | M31 | 3.6 | 2.633819 | 0.966181  |
| 17.4548 | M31 | 3.3 | 2.633819 | 0.666181  |
| 26.1822 | M31 | 2.1 | 2.235916 | -0.135916 |
| 26.1822 | M31 | 1.7 | 2.235916 | -0.535916 |
| 26.1822 | M31 | 1.8 | 2.235916 | -0.435916 |
| 34.9096 | M31 | 1.6 | 1.784410 | -0.184410 |
| 34.9096 | M31 | 1.6 | 1.784410 | -0.184410 |
| 34.9096 | M31 | 1.4 | 1.784410 | -0.384410 |
| 43.6370 | M31 | 1.8 | 1.394666 | 0.405334  |
| 43.6370 | M31 | 1.5 | 1.394666 | 0.105334  |
| 43.6370 | M31 | 1.3 | 1.394666 | -0.094666 |
| 52.3644 | M31 | 1.2 | 1.081956 | 0.118044  |
| 52.3644 | M31 | 0.9 | 1.081956 | -0.181956 |
| 52.3644 | M31 | 1.1 | 1.081956 | 0.018044  |
| 74.8063 | M31 | 0.5 | 0.558335 | -0.058335 |
| 74.8063 | M31 | 0.5 | 0.558335 | -0.058335 |
| 74.8063 | M31 | 0.3 | 0.558335 | -0.258335 |

**Listing 54:** SFO-SFO3b fit to Flaach data, two-component error

```

mkin version used for fitting: 1.0.4.9000
R version used for fitting: 4.1.0
Date of fit: Mon Jul 26 14:04:49 2021
Date of summary: Mon Jul 26 18:52:54 2021

Equations:
d_DMTA/dt = - k_DMTA * DMTA
d_M23/dt = + f_DMTA_to_M23 * k_DMTA * DMTA - k_M23 * M23
d_M27/dt = + f_DMTA_to_M27 * k_DMTA * DMTA - k_M27 * M27 + k_M31 * M31
d_M31/dt = + f_DMTA_to_M31 * k_DMTA * DMTA - k_M31 * M31

Model predictions using solution type deSolve

Fitted using 5109 model solutions performed in 10.478 s

Error model: Two-component variance function

Error model algorithm: d_3
Three-step fitting yielded a higher likelihood than direct fitting

Starting values for parameters to be optimised:
      value  type
DMTA_0    96.76667 state
k_DMTA     0.10000 deparm
k_M23      0.10010 deparm
k_M27      0.10020 deparm
k_M31      0.10030 deparm
f_DMTA_to_M23 0.25000 deparm
f_DMTA_to_M27 0.25000 deparm
f_DMTA_to_M31 0.25000 deparm
sigma_low  0.10000 error
rsd_high   0.10000 error

Starting values for the transformed parameters actually optimised:
      value lower upper
DMTA_0    96.766667 -Inf  Inf
log_k_DMTA -2.302585 -Inf  Inf
log_k_M23  -2.301586 -Inf  Inf
log_k_M27  -2.300587 -Inf  Inf
log_k_M31  -2.299590 -Inf  Inf
f_DMTA_ilr_1 0.000000 -Inf  Inf
f_DMTA_ilr_2 0.000000 -Inf  Inf
f_DMTA_ilr_3 0.000000 -Inf  Inf
sigma_low   0.100000  0    Inf
rsd_high    0.100000  0    Inf

Fixed parameter values:
      value  type
M23_0     0 state
M27_0     0 state
M31_0     0 state

Results:
      AIC      BIC    logLik
242.2497 271.3024 -111.1248

Optimised, transformed parameters with symmetric confidence intervals:
      Estimate Std. Error  Lower  Upper
DMTA_0    94.80000    0.828700 93.16000 96.44000
log_k_DMTA -1.94400    0.009540 -1.96300 -1.92500
log_k_M23  -3.07000    0.046650 -3.16300 -2.97800
log_k_M27  -3.39000    0.043480 -3.47600 -3.30400
log_k_M31  -3.51600    0.123600 -3.76000 -3.27100
f_DMTA_ilr_1 -0.02578    0.026970 -0.07916  0.02760

```

```
f_DMTA_ilr_2 0.91450 0.059320 0.79710 1.03200
f_DMTA_ilr_3 -1.76300 0.031220 -1.82500 -1.70100
sigma_low 0.46450 0.032860 0.39950 0.52960
rsd_high 0.02582 0.005469 0.01499 0.03664
```

Parameter correlation:

```
          DMTA_0 log_k_DMTA log_k_M23 log_k_M27 log_k_M31 f_DMTA_ilr_1
DMTA_0    1.00000 0.646262 -0.099677 -0.10111 -0.022884 -0.0152419
log_k_DMTA 0.64626 1.000000 -0.155082 -0.16007 -0.034752 -0.0237745
log_k_M23 -0.09968 -0.155082 1.000000 0.02504 0.005351 0.5775691
log_k_M27 -0.10111 -0.160073 0.025036 1.000000 0.489376 -0.2867759
log_k_M31 -0.02288 -0.034752 0.005351 0.48938 1.000000 0.1650234
f_DMTA_ilr_1 -0.01524 -0.023774 0.577569 -0.28678 0.165023 1.0000000
f_DMTA_ilr_2 -0.01218 -0.021695 0.154182 -0.41675 -0.738140 -0.0751080
f_DMTA_ilr_3 -0.47411 -0.424215 0.381369 0.62631 0.477175 0.1941824
sigma_low 0.03551 0.005975 0.002667 0.01439 -0.002995 0.0006744
rsd_high -0.08429 -0.011213 -0.004992 -0.02699 0.005625 -0.0012437

          f_DMTA_ilr_2 f_DMTA_ilr_3 sigma_low rsd_high
DMTA_0    -0.01218 -0.474114 0.0355078 -0.084294
log_k_DMTA -0.02170 -0.424215 0.0059750 -0.011213
log_k_M23 0.15418 0.381369 0.0026674 -0.004992
log_k_M27 -0.41675 0.626309 0.0143864 -0.026991
log_k_M31 -0.73814 0.477175 -0.0029954 0.005625
f_DMTA_ilr_1 -0.07511 0.194182 0.0006744 -0.001244
f_DMTA_ilr_2 1.00000 -0.494450 0.0119810 -0.022489
f_DMTA_ilr_3 -0.49445 1.000000 0.0066863 -0.012528
sigma_low 0.01198 0.006686 1.0000000 -0.241054
rsd_high -0.02249 -0.012528 -0.2410539 1.000000
```

Backtransformed parameters:

Confidence intervals for internally transformed parameters are asymmetric.  
t-test (unrealistically) based on the assumption of normal distribution  
for estimators of untransformed parameters.

|               | Estimate | t value | Pr(>t)     | Lower    | Upper    |
|---------------|----------|---------|------------|----------|----------|
| DMTA_0        | 94.80000 | 114.400 | 1.128e-128 | 93.16000 | 96.44000 |
| k_DMTA        | 0.14310  | 104.800 | 5.585e-124 | 0.14040  | 0.14580  |
| k_M23         | 0.04640  | 21.440  | 5.423e-44  | 0.04231  | 0.05089  |
| k_M27         | 0.03371  | 23.000  | 4.790e-47  | 0.03093  | 0.03674  |
| k_M31         | 0.02972  | 8.090   | 2.232e-13  | 0.02327  | 0.03796  |
| f_DMTA_to_M23 | 0.12920  | 31.220  | 3.580e-61  | NA       | NA       |
| f_DMTA_to_M27 | 0.13400  | 36.210  | 1.982e-68  | NA       | NA       |
| f_DMTA_to_M31 | 0.04294  | 14.570  | 5.169e-29  | NA       | NA       |
| sigma_low     | 0.46450  | 14.140  | 5.440e-28  | 0.39950  | 0.52960  |
| rsd_high      | 0.02582  | 4.721   | 3.097e-06  | 0.01499  | 0.03664  |

FOCUS Chi2 error levels in percent:

|          | err.min | n.optim | df |
|----------|---------|---------|----|
| All data | 4.744   | 8       | 37 |
| DMTA     | 2.148   | 2       | 10 |
| M23      | 11.513  | 2       | 9  |
| M27      | 4.421   | 2       | 9  |
| M31      | 19.436  | 2       | 9  |

Resulting formation fractions:

```
ff
DMTA_M23 0.12923
DMTA_M27 0.13402
DMTA_M31 0.04294
DMTA_sink 0.69382
```

Estimated disappearance times:

|      | DT50   | DT90  |
|------|--------|-------|
| DMTA | 4.844  | 16.09 |
| M23  | 14.939 | 49.63 |
| M27  | 20.563 | 68.31 |
| M31  | 23.319 | 77.47 |

Data:

| time variable | observed | predicted | residual |
|---------------|----------|-----------|----------|
|---------------|----------|-----------|----------|

|         |      |      |           |           |
|---------|------|------|-----------|-----------|
| 0.0000  | DMTA | 96.5 | 94.796944 | 1.703056  |
| 0.0000  | DMTA | 96.8 | 94.796944 | 2.003056  |
| 0.0000  | DMTA | 97.0 | 94.796944 | 2.203056  |
| 0.6234  | DMTA | 82.9 | 86.707086 | -3.807086 |
| 0.6234  | DMTA | 86.7 | 86.707086 | -0.007086 |
| 0.6234  | DMTA | 87.4 | 86.707086 | 0.692914  |
| 1.8702  | DMTA | 72.8 | 72.539592 | 0.260408  |
| 1.8702  | DMTA | 69.9 | 72.539592 | -2.639592 |
| 1.8702  | DMTA | 71.9 | 72.539592 | -0.639592 |
| 4.3637  | DMTA | 51.4 | 50.771049 | 0.628951  |
| 4.3637  | DMTA | 52.9 | 50.771049 | 2.128951  |
| 4.3637  | DMTA | 48.6 | 50.771049 | -2.171049 |
| 8.7274  | DMTA | 28.5 | 27.191799 | 1.308201  |
| 8.7274  | DMTA | 27.3 | 27.191799 | 0.108201  |
| 8.7274  | DMTA | 27.5 | 27.191799 | 0.308201  |
| 13.0911 | DMTA | 14.8 | 14.563298 | 0.236702  |
| 13.0911 | DMTA | 13.4 | 14.563298 | -1.163298 |
| 13.0911 | DMTA | 14.4 | 14.563298 | -0.163298 |
| 17.4548 | DMTA | 7.7  | 7.799766  | -0.099766 |
| 17.4548 | DMTA | 7.3  | 7.799766  | -0.499766 |
| 17.4548 | DMTA | 8.1  | 7.799766  | 0.300234  |
| 26.1822 | DMTA | 2.0  | 2.237305  | -0.237305 |
| 26.1822 | DMTA | 1.5  | 2.237305  | -0.737305 |
| 26.1822 | DMTA | 1.9  | 2.237305  | -0.337305 |
| 34.9096 | DMTA | 1.3  | 0.641754  | 0.658246  |
| 34.9096 | DMTA | 1.0  | 0.641754  | 0.358246  |
| 34.9096 | DMTA | 1.1  | 0.641754  | 0.458246  |
| 43.6370 | DMTA | 0.9  | 0.184082  | 0.715918  |
| 43.6370 | DMTA | 0.7  | 0.184082  | 0.515918  |
| 43.6370 | DMTA | 0.7  | 0.184082  | 0.515918  |
| 52.3644 | DMTA | 0.6  | 0.052803  | 0.547197  |
| 52.3644 | DMTA | 0.4  | 0.052803  | 0.347197  |
| 52.3644 | DMTA | 0.5  | 0.052803  | 0.447197  |
| 74.8063 | DMTA | 0.4  | 0.002128  | 0.397872  |
| 74.8063 | DMTA | 0.3  | 0.002128  | 0.297872  |
| 74.8063 | DMTA | 0.3  | 0.002128  | 0.297872  |
| 0.6234  | M23  | 0.7  | 1.030222  | -0.330222 |
| 0.6234  | M23  | 0.7  | 1.030222  | -0.330222 |
| 0.6234  | M23  | 0.2  | 1.030222  | -0.830222 |
| 1.8702  | M23  | 2.2  | 2.749644  | -0.549644 |
| 1.8702  | M23  | 1.8  | 2.749644  | -0.949644 |
| 1.8702  | M23  | 1.6  | 2.749644  | -1.149644 |
| 4.3637  | M23  | 4.1  | 5.096548  | -0.996548 |
| 4.3637  | M23  | 4.2  | 5.096548  | -0.896548 |
| 4.3637  | M23  | 4.2  | 5.096548  | -0.896548 |
| 8.7274  | M23  | 7.5  | 6.892009  | 0.607991  |
| 8.7274  | M23  | 7.1  | 6.892009  | 0.207991  |
| 8.7274  | M23  | 7.5  | 6.892009  | 0.607991  |
| 13.0911 | M23  | 8.4  | 7.090698  | 1.309302  |
| 13.0911 | M23  | 6.8  | 7.090698  | -0.290698 |
| 13.0911 | M23  | 8.0  | 7.090698  | 0.909302  |
| 17.4548 | M23  | 7.2  | 6.574027  | 0.625973  |
| 17.4548 | M23  | 7.2  | 6.574027  | 0.625973  |
| 17.4548 | M23  | 6.9  | 6.574027  | 0.325973  |
| 26.1822 | M23  | 4.9  | 4.952071  | -0.052071 |
| 26.1822 | M23  | 4.3  | 4.952071  | -0.652071 |
| 26.1822 | M23  | 4.5  | 4.952071  | -0.452071 |
| 34.9096 | M23  | 3.8  | 3.465787  | 0.334213  |
| 34.9096 | M23  | 3.1  | 3.465787  | -0.365787 |
| 34.9096 | M23  | 3.1  | 3.465787  | -0.365787 |
| 43.6370 | M23  | 2.7  | 2.358406  | 0.341594  |
| 43.6370 | M23  | 2.3  | 2.358406  | -0.058406 |
| 43.6370 | M23  | 2.1  | 2.358406  | -0.258406 |
| 52.3644 | M23  | 1.6  | 1.586487  | 0.013513  |
| 52.3644 | M23  | 1.1  | 1.586487  | -0.486487 |
| 52.3644 | M23  | 1.3  | 1.586487  | -0.286487 |
| 74.8063 | M23  | 0.4  | 0.563201  | -0.163201 |
| 74.8063 | M23  | 0.4  | 0.563201  | -0.163201 |
| 74.8063 | M23  | 0.3  | 0.563201  | -0.263201 |

|         |     |     |          |           |
|---------|-----|-----|----------|-----------|
| 0.6234  | M27 | 1.1 | 1.075975 | 0.024025  |
| 0.6234  | M27 | 1.1 | 1.075975 | 0.024025  |
| 0.6234  | M27 | 0.3 | 1.075975 | -0.775975 |
| 1.8702  | M27 | 2.6 | 2.913522 | -0.313522 |
| 1.8702  | M27 | 2.4 | 2.913522 | -0.513522 |
| 1.8702  | M27 | 2.3 | 2.913522 | -0.613522 |
| 4.3637  | M27 | 5.0 | 5.568258 | -0.568258 |
| 4.3637  | M27 | 5.9 | 5.568258 | 0.331742  |
| 4.3637  | M27 | 4.8 | 5.568258 | -0.768258 |
| 8.7274  | M27 | 8.5 | 7.987717 | 0.512283  |
| 8.7274  | M27 | 8.5 | 7.987717 | 0.512283  |
| 8.7274  | M27 | 8.3 | 7.987717 | 0.312283  |
| 13.0911 | M27 | 9.3 | 8.773537 | 0.526463  |
| 13.0911 | M27 | 8.7 | 8.773537 | -0.073537 |
| 13.0911 | M27 | 9.1 | 8.773537 | 0.326463  |
| 17.4548 | M27 | 8.6 | 8.732925 | -0.132925 |
| 17.4548 | M27 | 8.5 | 8.732925 | -0.232925 |
| 17.4548 | M27 | 8.9 | 8.732925 | 0.167075  |
| 26.1822 | M27 | 8.1 | 7.682784 | 0.417216  |
| 26.1822 | M27 | 7.7 | 7.682784 | 0.017216  |
| 26.1822 | M27 | 7.4 | 7.682784 | -0.282784 |
| 34.9096 | M27 | 5.9 | 6.353444 | -0.453444 |
| 34.9096 | M27 | 6.0 | 6.353444 | -0.353444 |
| 34.9096 | M27 | 5.9 | 6.353444 | -0.453444 |
| 43.6370 | M27 | 5.6 | 5.139435 | 0.460565  |
| 43.6370 | M27 | 5.2 | 5.139435 | 0.060565  |
| 43.6370 | M27 | 5.6 | 5.139435 | 0.460565  |
| 52.3644 | M27 | 4.3 | 4.119341 | 0.180659  |
| 52.3644 | M27 | 3.7 | 4.119341 | -0.419341 |
| 52.3644 | M27 | 3.9 | 4.119341 | -0.219341 |
| 74.8063 | M27 | 2.5 | 2.291693 | 0.208307  |
| 74.8063 | M27 | 2.4 | 2.291693 | 0.108307  |
| 74.8063 | M27 | 2.2 | 2.291693 | -0.091693 |
| 0.6234  | M31 | 0.3 | 0.344096 | -0.044096 |
| 0.6234  | M31 | 0.3 | 0.344096 | -0.044096 |
| 0.6234  | M31 | 0.1 | 0.344096 | -0.244096 |
| 1.8702  | M31 | 0.7 | 0.928403 | -0.228403 |
| 1.8702  | M31 | 0.6 | 0.928403 | -0.328403 |
| 1.8702  | M31 | 0.7 | 0.928403 | -0.228403 |
| 4.3637  | M31 | 1.3 | 1.760945 | -0.460945 |
| 4.3637  | M31 | 1.2 | 1.760945 | -0.560945 |
| 4.3637  | M31 | 1.4 | 1.760945 | -0.360945 |
| 8.7274  | M31 | 2.4 | 2.489852 | -0.089852 |
| 8.7274  | M31 | 2.1 | 2.489852 | -0.389852 |
| 8.7274  | M31 | 2.3 | 2.489852 | -0.189852 |
| 13.0911 | M31 | 3.3 | 2.692081 | 0.607919  |
| 13.0911 | M31 | 2.4 | 2.692081 | -0.292081 |
| 13.0911 | M31 | 2.6 | 2.692081 | -0.092081 |
| 17.4548 | M31 | 4.0 | 2.635123 | 1.364877  |
| 17.4548 | M31 | 3.6 | 2.635123 | 0.964877  |
| 17.4548 | M31 | 3.3 | 2.635123 | 0.664877  |
| 26.1822 | M31 | 2.1 | 2.237867 | -0.137867 |
| 26.1822 | M31 | 1.7 | 2.237867 | -0.537867 |
| 26.1822 | M31 | 1.8 | 2.237867 | -0.437867 |
| 34.9096 | M31 | 1.6 | 1.785283 | -0.185283 |
| 34.9096 | M31 | 1.6 | 1.785283 | -0.185283 |
| 34.9096 | M31 | 1.4 | 1.785283 | -0.385283 |
| 43.6370 | M31 | 1.8 | 1.394207 | 0.405793  |
| 43.6370 | M31 | 1.5 | 1.394207 | 0.105793  |
| 43.6370 | M31 | 1.3 | 1.394207 | -0.094207 |
| 52.3644 | M31 | 1.2 | 1.080470 | 0.119530  |
| 52.3644 | M31 | 0.9 | 1.080470 | -0.180470 |
| 52.3644 | M31 | 1.1 | 1.080470 | 0.019530  |
| 74.8063 | M31 | 0.5 | 0.555863 | -0.055863 |
| 74.8063 | M31 | 0.5 | 0.555863 | -0.055863 |
| 74.8063 | M31 | 0.3 | 0.555863 | -0.255863 |

## Listing 55: SFO-SFO3b fit to BBA 2.2 data, constant variance

```

mkin version used for fitting: 1.0.4.9000
R version used for fitting: 4.1.0
Date of fit: Mon Jul 26 14:04:05 2021
Date of summary: Mon Jul 26 18:52:54 2021

Equations:
d_DMTA/dt = - k_DMTA * DMTA
d_M23/dt = + f_DMTA_to_M23 * k_DMTA * DMTA - k_M23 * M23
d_M27/dt = + f_DMTA_to_M27 * k_DMTA * DMTA - k_M27 * M27 + k_M31 * M31
d_M31/dt = + f_DMTA_to_M31 * k_DMTA * DMTA - k_M31 * M31

Model predictions using solution type deSolve

Fitted using 1205 model solutions performed in 2.395 s

Error model: Constant variance

Error model algorithm: OLS

Starting values for parameters to be optimised:
      value type
DMTA_0    98.4300 state
k_DMTA     0.1000 deparm
k_M23      0.1001 deparm
k_M27      0.1002 deparm
k_M31      0.1003 deparm
f_DMTA_to_M23 0.2500 deparm
f_DMTA_to_M27 0.2500 deparm
f_DMTA_to_M31 0.2500 deparm

Starting values for the transformed parameters actually optimised:
      value lower upper
DMTA_0    98.430000 -Inf  Inf
log_k_DMTA -2.302585 -Inf  Inf
log_k_M23  -2.301586 -Inf  Inf
log_k_M27  -2.300587 -Inf  Inf
log_k_M31  -2.299590 -Inf  Inf
f_DMTA_ilr_1 0.000000 -Inf  Inf
f_DMTA_ilr_2 0.000000 -Inf  Inf
f_DMTA_ilr_3 0.000000 -Inf  Inf

Fixed parameter values:
      value type
M23_0     0 state
M27_0     0 state
M31_0     0 state

Results:
      AIC      BIC    logLik
290.2203 312.7185 -136.1101

Optimised, transformed parameters with symmetric confidence intervals:
      Estimate Std. Error Lower Upper
DMTA_0    99.71000    0.49260 98.73000 100.7000
log_k_DMTA -2.65300    0.01247 -2.67700 -2.6280
log_k_M23  -3.81500    0.12920 -4.07200 -3.5580
log_k_M27  -4.20600    0.14060 -4.48600 -3.9270
log_k_M31  -4.21700    0.19730 -4.61000 -3.8250
f_DMTA_ilr_1 0.09711    0.06594 -0.03410 0.2283
f_DMTA_ilr_2 0.23280    0.08461 0.06447 0.4012
f_DMTA_ilr_3 -1.42400    0.05356 -1.53100 -1.3170
sigma      1.09800    0.08183 0.93510 1.2610

Parameter correlation:

```

|              | DMTA_0       | log_k_DMTA   | log_k_M23    | log_k_M27  | log_k_M31  |
|--------------|--------------|--------------|--------------|------------|------------|
| DMTA_0       | 1.000e+00    | 5.338e-01    | -5.037e-02   | -6.090e-02 | -3.181e-02 |
| log_k_DMTA   | 5.338e-01    | 1.000e+00    | -9.436e-02   | -1.141e-01 | -5.960e-02 |
| log_k_M23    | -5.037e-02   | -9.436e-02   | 1.000e+00    | 1.077e-02  | 5.624e-03  |
| log_k_M27    | -6.090e-02   | -1.141e-01   | 1.077e-02    | 1.000e+00  | 6.274e-01  |
| log_k_M31    | -3.181e-02   | -5.960e-02   | 5.624e-03    | 6.274e-01  | 1.000e+00  |
| f_DMTA_ilr_1 | -9.478e-03   | -1.776e-02   | 5.921e-01    | -2.244e-01 | 2.219e-01  |
| f_DMTA_ilr_2 | -2.767e-03   | -5.184e-03   | 2.661e-01    | -3.965e-01 | -7.594e-01 |
| f_DMTA_ilr_3 | -2.299e-01   | -2.609e-01   | 5.239e-01    | 6.235e-01  | 3.840e-01  |
| sigma        | 2.346e-07    | 5.874e-09    | -1.248e-07   | 9.003e-08  | 5.327e-08  |
|              | f_DMTA_ilr_1 | f_DMTA_ilr_2 | f_DMTA_ilr_3 | sigma      |            |
| DMTA_0       | -9.478e-03   | -2.767e-03   | -2.299e-01   | 2.346e-07  |            |
| log_k_DMTA   | -1.776e-02   | -5.184e-03   | -2.609e-01   | 5.874e-09  |            |
| log_k_M23    | 5.921e-01    | 2.661e-01    | 5.239e-01    | -1.248e-07 |            |
| log_k_M27    | -2.244e-01   | -3.965e-01   | 6.235e-01    | 9.003e-08  |            |
| log_k_M31    | 2.219e-01    | -7.594e-01   | 3.840e-01    | 5.327e-08  |            |
| f_DMTA_ilr_1 | 1.000e+00    | -1.268e-01   | 2.123e-01    | 6.755e-09  |            |
| f_DMTA_ilr_2 | -1.268e-01   | 1.000e+00    | -1.018e-01   | -2.137e-07 |            |
| f_DMTA_ilr_3 | 2.123e-01    | -1.018e-01   | 1.000e+00    | -5.712e-08 |            |
| sigma        | 6.755e-09    | -2.137e-07   | -5.712e-08   | 1.000e+00  |            |

Backtransformed parameters:

Confidence intervals for internally transformed parameters are asymmetric.  
t-test (unrealistically) based on the assumption of normal distribution  
for estimators of untransformed parameters.

|               | Estimate | t value | Pr(>t)     | Lower     | Upper     |
|---------------|----------|---------|------------|-----------|-----------|
| DMTA_0        | 99.71000 | 202.400 | 1.257e-111 | 98.730000 | 100.70000 |
| k_DMTA        | 0.07047  | 80.190  | 3.078e-79  | 0.068750  | 0.07224   |
| k_M23         | 0.02203  | 7.738   | 1.230e-11  | 0.017030  | 0.02849   |
| k_M27         | 0.01490  | 7.113   | 2.038e-10  | 0.011270  | 0.01971   |
| k_M31         | 0.01474  | 5.068   | 1.244e-06  | 0.009952  | 0.02182   |
| f_DMTA_to_M23 | 0.14350  | 14.460  | 1.890e-24  | NA        | NA        |
| f_DMTA_to_M27 | 0.12510  | 15.500  | 2.939e-26  | NA        | NA        |
| f_DMTA_to_M31 | 0.10070  | 11.820  | 1.290e-19  | NA        | NA        |
| sigma         | 1.09800  | 13.420  | 1.391e-22  | 0.935100  | 1.26100   |

FOCUS Chi2 error levels in percent:

|          | err.min | n.optim | df |
|----------|---------|---------|----|
| All data | 6.791   | 8       | 37 |
| DMTA     | 3.514   | 2       | 10 |
| M23      | 9.336   | 2       | 9  |
| M27      | 9.988   | 2       | 9  |
| M31      | 10.794  | 2       | 9  |

Resulting formation fractions:

|           | ff     |
|-----------|--------|
| DMTA_M23  | 0.1435 |
| DMTA_M27  | 0.1251 |
| DMTA_M31  | 0.1007 |
| DMTA_sink | 0.6307 |

Estimated disappearance times:

|      | DT50   | DT90   |
|------|--------|--------|
| DMTA | 9.836  | 32.67  |
| M23  | 31.464 | 104.52 |
| M27  | 46.515 | 154.52 |
| M31  | 47.036 | 156.25 |

Data:

|         | time | variable | observed | predicted | residual |
|---------|------|----------|----------|-----------|----------|
| 0.0000  |      | DMTA     | 98.09    | 99.7055   | -1.61552 |
| 0.0000  |      | DMTA     | 98.77    | 99.7055   | -0.93552 |
| 0.7679  |      | DMTA     | 93.52    | 94.4533   | -0.93330 |
| 0.7679  |      | DMTA     | 92.03    | 94.4533   | -2.42330 |
| 2.3037  |      | DMTA     | 88.39    | 84.7643   | 3.62569  |
| 2.3037  |      | DMTA     | 87.18    | 84.7643   | 2.41569  |
| 5.3752  |      | DMTA     | 69.38    | 68.2660   | 1.11395  |
| 5.3752  |      | DMTA     | 71.06    | 68.2660   | 2.79395  |
| 10.7505 |      | DMTA     | 45.21    | 46.7402   | -1.53017 |



|         |      |       |         |          |
|---------|------|-------|---------|----------|
| 10.7505 | DMTA | 46.81 | 46.7402 | 0.06983  |
| 16.1257 | DMTA | 30.54 | 32.0019 | -1.46190 |
| 16.1257 | DMTA | 30.07 | 32.0019 | -1.93190 |
| 21.5010 | DMTA | 21.60 | 21.9110 | -0.31096 |
| 21.5010 | DMTA | 20.41 | 21.9110 | -1.50096 |
| 32.2515 | DMTA | 9.10  | 10.2715 | -1.17147 |
| 32.2515 | DMTA | 9.70  | 10.2715 | -0.57147 |
| 43.0020 | DMTA | 6.58  | 4.8151  | 1.76492  |
| 43.0020 | DMTA | 6.31  | 4.8151  | 1.49492  |
| 53.7525 | DMTA | 3.47  | 2.2572  | 1.21278  |
| 53.7525 | DMTA | 3.52  | 2.2572  | 1.26278  |
| 64.5029 | DMTA | 3.40  | 1.0581  | 2.34185  |
| 64.5029 | DMTA | 3.67  | 1.0581  | 2.61185  |
| 91.3792 | DMTA | 1.62  | 0.1592  | 1.46079  |
| 91.3792 | DMTA | 1.62  | 0.1592  | 1.46079  |
| 0.7679  | M23  | 0.36  | 0.7472  | -0.38723 |
| 0.7679  | M23  | 0.40  | 0.7472  | -0.34723 |
| 2.3037  | M23  | 1.03  | 2.0889  | -1.05894 |
| 2.3037  | M23  | 1.07  | 2.0889  | -1.01894 |
| 5.3752  | M23  | 3.60  | 4.2384  | -0.63844 |
| 5.3752  | M23  | 3.66  | 4.2384  | -0.57844 |
| 10.7505 | M23  | 6.97  | 6.6671  | 0.30292  |
| 10.7505 | M23  | 7.22  | 6.6671  | 0.55292  |
| 16.1257 | M23  | 8.65  | 7.9094  | 0.74055  |
| 16.1257 | M23  | 8.38  | 7.9094  | 0.47055  |
| 21.5010 | M23  | 9.10  | 8.3866  | 0.71344  |
| 21.5010 | M23  | 8.63  | 8.3866  | 0.24344  |
| 32.2515 | M23  | 7.63  | 8.0832  | -0.45317 |
| 32.2515 | M23  | 8.01  | 8.0832  | -0.07317 |
| 43.0020 | M23  | 6.40  | 7.0655  | -0.66545 |
| 43.0020 | M23  | 6.35  | 7.0655  | -0.71545 |
| 53.7525 | M23  | 5.35  | 5.8975  | -0.54749 |
| 53.7525 | M23  | 5.06  | 5.8975  | -0.83749 |
| 64.5029 | M23  | 5.14  | 4.8048  | 0.33521  |
| 64.5029 | M23  | 5.91  | 4.8048  | 1.10521  |
| 91.3792 | M23  | 3.35  | 2.7468  | 0.60316  |
| 91.3792 | M23  | 2.87  | 2.7468  | 0.12316  |
| 0.7679  | M27  | 0.42  | 0.6561  | -0.23614 |
| 0.7679  | M27  | 0.47  | 0.6561  | -0.18614 |
| 2.3037  | M27  | 0.71  | 1.8618  | -1.15184 |
| 2.3037  | M27  | 0.82  | 1.8618  | -1.04184 |
| 5.3752  | M27  | 2.19  | 3.8956  | -1.70563 |
| 5.3752  | M27  | 2.28  | 3.8956  | -1.61563 |
| 10.7505 | M27  | 5.45  | 6.4852  | -1.03516 |
| 10.7505 | M27  | 5.19  | 6.4852  | -1.29516 |
| 16.1257 | M27  | 8.81  | 8.1695  | 0.64049  |
| 16.1257 | M27  | 7.93  | 8.1695  | -0.23951 |
| 21.5010 | M27  | 10.25 | 9.2253  | 1.02472  |
| 21.5010 | M27  | 10.77 | 9.2253  | 1.54472  |
| 32.2515 | M27  | 10.89 | 10.1575 | 0.73250  |
| 32.2515 | M27  | 10.85 | 10.1575 | 0.69250  |
| 43.0020 | M27  | 10.41 | 10.2118 | 0.19816  |
| 43.0020 | M27  | 10.35 | 10.2118 | 0.13816  |
| 53.7525 | M27  | 9.92  | 9.8408  | 0.07915  |
| 53.7525 | M27  | 9.42  | 9.8408  | -0.42085 |
| 64.5029 | M27  | 9.15  | 9.2690  | -0.11904 |
| 64.5029 | M27  | 9.25  | 9.2690  | -0.01904 |
| 91.3792 | M27  | 7.14  | 7.5841  | -0.44411 |
| 91.3792 | M27  | 7.13  | 7.5841  | -0.45411 |
| 0.7679  | M31  | 0.36  | 0.5260  | -0.16604 |
| 0.7679  | M31  | 0.33  | 0.5260  | -0.19604 |
| 2.3037  | M31  | 0.55  | 1.4791  | -0.92907 |
| 2.3037  | M31  | 0.64  | 1.4791  | -0.83907 |
| 5.3752  | M31  | 1.94  | 3.0371  | -1.09708 |
| 5.3752  | M31  | 1.62  | 3.0371  | -1.41708 |
| 10.7505 | M31  | 4.22  | 4.8852  | -0.66521 |
| 10.7505 | M31  | 4.37  | 4.8852  | -0.51521 |
| 16.1257 | M31  | 6.31  | 5.9369  | 0.37310  |
| 16.1257 | M31  | 6.85  | 5.9369  | 0.91310  |

|         |     |      |        |          |
|---------|-----|------|--------|----------|
| 21.5010 | M31 | 7.05 | 6.4596 | 0.59044  |
| 21.5010 | M31 | 6.84 | 6.4596 | 0.38044  |
| 32.2515 | M31 | 6.53 | 6.5867 | -0.05671 |
| 32.2515 | M31 | 7.11 | 6.5867 | 0.52329  |
| 43.0020 | M31 | 6.06 | 6.1249 | -0.06493 |
| 43.0020 | M31 | 6.05 | 6.1249 | -0.07493 |
| 53.7525 | M31 | 5.50 | 5.4635 | 0.03653  |
| 53.7525 | M31 | 5.07 | 5.4635 | -0.39347 |
| 64.5029 | M31 | 4.94 | 4.7736 | 0.16641  |
| 64.5029 | M31 | 4.39 | 4.7736 | -0.38359 |
| 91.3792 | M31 | 3.64 | 3.2829 | 0.35713  |
| 91.3792 | M31 | 3.55 | 3.2829 | 0.26713  |

**Listing 56:** SFO-SFO3b fit to BBA 2.2 data, two-component error

```

mkin version used for fitting: 1.0.4.9000
R version used for fitting: 4.1.0
Date of fit: Mon Jul 26 14:04:49 2021
Date of summary: Mon Jul 26 18:52:54 2021

Equations:
d_DMTA/dt = - k_DMTA * DMTA
d_M23/dt = + f_DMTA_to_M23 * k_DMTA * DMTA - k_M23 * M23
d_M27/dt = + f_DMTA_to_M27 * k_DMTA * DMTA - k_M27 * M27 + k_M31 * M31
d_M31/dt = + f_DMTA_to_M31 * k_DMTA * DMTA - k_M31 * M31

Model predictions using solution type deSolve

Fitted using 4453 model solutions performed in 9.589 s

Error model: Two-component variance function

Error model algorithm: d_3
Direct fitting and three-step fitting yield approximately the same likelihood

Starting values for parameters to be optimised:
      value  type
DMTA_0    98.4300 state
k_DMTA      0.1000 deparm
k_M23       0.1001 deparm
k_M27       0.1002 deparm
k_M31       0.1003 deparm
f_DMTA_to_M23 0.2500 deparm
f_DMTA_to_M27 0.2500 deparm
f_DMTA_to_M31 0.2500 deparm
sigma_low   0.1000 error
rsd_high    0.1000 error

Starting values for the transformed parameters actually optimised:
      value lower upper
DMTA_0    98.430000 -Inf  Inf
log_k_DMTA -2.302585 -Inf  Inf
log_k_M23  -2.301586 -Inf  Inf
log_k_M27  -2.300587 -Inf  Inf
log_k_M31  -2.299590 -Inf  Inf
f_DMTA_ilr_1 0.000000 -Inf  Inf
f_DMTA_ilr_2 0.000000 -Inf  Inf
f_DMTA_ilr_3 0.000000 -Inf  Inf
sigma_low   0.100000  0    Inf
rsd_high    0.100000  0    Inf

Fixed parameter values:
      value  type
M23_0     0 state
M27_0     0 state
M31_0     0 state

Results:
      AIC      BIC    logLik
274.5035 299.5016 -127.2518

Optimised, transformed parameters with symmetric confidence intervals:
      Estimate Std. Error  Lower  Upper
DMTA_0    99.63000    1.020000  97.60000 101.70000
log_k_DMTA -2.64800    0.015530 -2.67900 -2.61700
log_k_M23  -3.82300    0.106800 -4.03600 -3.61100
log_k_M27  -4.21700    0.118000 -4.45100 -3.98200
log_k_M31  -4.22500    0.162700 -4.54800 -3.90100
f_DMTA_ilr_1 0.09707    0.054390 -0.01117  0.20530

```

```
f_DMTA_ilr_2 0.23220 0.069450 0.09401 0.37040
f_DMTA_ilr_3 -1.43000 0.048590 -1.52700 -1.33300
sigma_low 0.89260 0.074000 0.74530 1.04000
rsd_high 0.02311 0.006333 0.01051 0.03572
```

Parameter correlation:

```
          DMTA_0 log_k_DMTA log_k_M23 log_k_M27 log_k_M31 f_DMTA_ilr_1
DMTA_0      1.000000  0.663964 -0.088796 -0.107000 -0.057168 -0.018759
log_k_DMTA  0.663964  1.000000 -0.136722 -0.164600 -0.087769 -0.027543
log_k_M23   -0.088796 -0.136722  1.000000  0.02285  0.012169  0.587272
log_k_M27   -0.107002 -0.164604  0.022855  1.000000  0.624487 -0.226184
log_k_M31   -0.057168 -0.087769  0.012169  0.62449  1.000000  0.220156
f_DMTA_ilr_1 -0.018759 -0.027543  0.587272 -0.22618  0.220156  1.000000
f_DMTA_ilr_2 -0.003901 -0.006483  0.264851 -0.38515 -0.755766 -0.127743
f_DMTA_ilr_3 -0.453522 -0.445934  0.508451  0.60704  0.371548  0.193222
sigma_low   0.120562  0.119787 -0.009043 -0.01125 -0.006421 -0.005047
rsd_high    -0.282207 -0.263025  0.019855  0.02470  0.014094  0.011075
          f_DMTA_ilr_2 f_DMTA_ilr_3 sigma_low rsd_high
DMTA_0      -0.0039014 -0.45352  0.1205625 -0.282207
log_k_DMTA   -0.0064829 -0.44593  0.1197871 -0.263025
log_k_M23     0.2648512  0.50845 -0.0090430  0.019855
log_k_M27    -0.3851517  0.60704 -0.0112473  0.024697
log_k_M31    -0.7557662  0.37155 -0.0064206  0.014094
f_DMTA_ilr_1 -0.1277429  0.19322 -0.0050466  0.011075
f_DMTA_ilr_2  1.0000000 -0.08722  0.0007155 -0.001568
f_DMTA_ilr_3 -0.0872234  1.00000 -0.0528183  0.115976
sigma_low     0.0007155 -0.05282  1.0000000 -0.176589
rsd_high     -0.0015683  0.11598 -0.1765887  1.000000
```

Backtransformed parameters:

Confidence intervals for internally transformed parameters are asymmetric.  
t-test (unrealistically) based on the assumption of normal distribution  
for estimators of untransformed parameters.

|               | Estimate | t value | Pr(>t)    | Lower    | Upper     |
|---------------|----------|---------|-----------|----------|-----------|
| DMTA_0        | 99.63000 | 97.680  | 2.785e-85 | 97.60000 | 101.70000 |
| k_DMTA        | 0.07081  | 64.390  | 5.500e-71 | 0.06865  | 0.07303   |
| k_M23         | 0.02186  | 9.363   | 8.518e-15 | 0.01767  | 0.02703   |
| k_M27         | 0.01475  | 8.473   | 4.769e-13 | 0.01166  | 0.01865   |
| k_M31         | 0.01463  | 6.148   | 1.456e-08 | 0.01058  | 0.02022   |
| f_DMTA_to_M23 | 0.14280  | 16.940  | 1.705e-28 | NA       | NA        |
| f_DMTA_to_M27 | 0.12450  | 18.090  | 2.682e-30 | NA       | NA        |
| f_DMTA_to_M31 | 0.10030  | 14.090  | 1.101e-23 | NA       | NA        |
| sigma_low     | 0.89260  | 12.060  | 5.475e-20 | 0.74530  | 1.04000   |
| rsd_high      | 0.02311  | 3.650   | 2.332e-04 | 0.01051  | 0.03572   |

FOCUS Chi2 error levels in percent:

|          | err.min | n.optim | df |
|----------|---------|---------|----|
| All data | 6.804   | 8       | 37 |
| DMTA     | 3.521   | 2       | 10 |
| M23      | 9.330   | 2       | 9  |
| M27      | 10.029  | 2       | 9  |
| M31      | 10.804  | 2       | 9  |

Resulting formation fractions:

```
ff
DMTA_M23 0.1428
DMTA_M27 0.1245
DMTA_M31 0.1003
DMTA_sink 0.6323
```

Estimated disappearance times:

|      | DT50   | DT90   |
|------|--------|--------|
| DMTA | 9.789  | 32.52  |
| M23  | 31.714 | 105.35 |
| M27  | 46.995 | 156.11 |
| M31  | 47.378 | 157.39 |

Data:

time variable observed predicted residual

|         |      |       |         |          |
|---------|------|-------|---------|----------|
| 0.0000  | DMTA | 98.09 | 99.6346 | -1.54455 |
| 0.0000  | DMTA | 98.77 | 99.6346 | -0.86455 |
| 0.7679  | DMTA | 93.52 | 94.3620 | -0.84197 |
| 0.7679  | DMTA | 92.03 | 94.3620 | -2.33197 |
| 2.3037  | DMTA | 88.39 | 84.6391 | 3.75089  |
| 2.3037  | DMTA | 87.18 | 84.6391 | 2.54089  |
| 5.3752  | DMTA | 69.38 | 68.0956 | 1.28437  |
| 5.3752  | DMTA | 71.06 | 68.0956 | 2.96437  |
| 10.7505 | DMTA | 45.21 | 46.5402 | -1.33023 |
| 10.7505 | DMTA | 46.81 | 46.5402 | 0.26977  |
| 16.1257 | DMTA | 30.54 | 31.8081 | -1.26811 |
| 16.1257 | DMTA | 30.07 | 31.8081 | -1.73811 |
| 21.5010 | DMTA | 21.60 | 21.7394 | -0.13938 |
| 21.5010 | DMTA | 20.41 | 21.7394 | -1.32938 |
| 32.2515 | DMTA | 9.10  | 10.1547 | -1.05467 |
| 32.2515 | DMTA | 9.70  | 10.1547 | -0.45467 |
| 43.0020 | DMTA | 6.58  | 4.7433  | 1.83666  |
| 43.0020 | DMTA | 6.31  | 4.7433  | 1.56666  |
| 53.7525 | DMTA | 3.47  | 2.2157  | 1.25434  |
| 53.7525 | DMTA | 3.52  | 2.2157  | 1.30434  |
| 64.5029 | DMTA | 3.40  | 1.0350  | 2.36505  |
| 64.5029 | DMTA | 3.67  | 1.0350  | 2.63505  |
| 91.3792 | DMTA | 1.62  | 0.1543  | 1.46566  |
| 91.3792 | DMTA | 1.62  | 0.1543  | 1.46566  |
| 0.7679  | M23  | 0.36  | 0.7467  | -0.38673 |
| 0.7679  | M23  | 0.40  | 0.7467  | -0.34673 |
| 2.3037  | M23  | 1.03  | 2.0873  | -1.05731 |
| 2.3037  | M23  | 1.07  | 2.0873  | -1.01731 |
| 5.3752  | M23  | 3.60  | 4.2343  | -0.63430 |
| 5.3752  | M23  | 3.66  | 4.2343  | -0.57430 |
| 10.7505 | M23  | 6.97  | 6.6589  | 0.31111  |
| 10.7505 | M23  | 7.22  | 6.6589  | 0.56111  |
| 16.1257 | M23  | 8.65  | 7.8987  | 0.75133  |
| 16.1257 | M23  | 8.38  | 7.8987  | 0.48133  |
| 21.5010 | M23  | 9.10  | 8.3749  | 0.72506  |
| 21.5010 | M23  | 8.63  | 8.3749  | 0.25506  |
| 32.2515 | M23  | 7.63  | 8.0741  | -0.44412 |
| 32.2515 | M23  | 8.01  | 8.0741  | -0.06412 |
| 43.0020 | M23  | 6.40  | 7.0621  | -0.66205 |
| 43.0020 | M23  | 6.35  | 7.0621  | -0.71205 |
| 53.7525 | M23  | 5.35  | 5.9003  | -0.55026 |
| 53.7525 | M23  | 5.06  | 5.9003  | -0.84026 |
| 64.5029 | M23  | 5.14  | 4.8128  | 0.32719  |
| 64.5029 | M23  | 5.91  | 4.8128  | 1.09719  |
| 91.3792 | M23  | 3.35  | 2.7617  | 0.58827  |
| 91.3792 | M23  | 2.87  | 2.7617  | 0.10827  |
| 0.7679  | M27  | 0.42  | 0.6557  | -0.23571 |
| 0.7679  | M27  | 0.47  | 0.6557  | -0.18571 |
| 2.3037  | M27  | 0.71  | 1.8603  | -1.15027 |
| 2.3037  | M27  | 0.82  | 1.8603  | -1.04027 |
| 5.3752  | M27  | 2.19  | 3.8910  | -1.70103 |
| 5.3752  | M27  | 2.28  | 3.8910  | -1.61103 |
| 10.7505 | M27  | 5.45  | 6.4744  | -1.02442 |
| 10.7505 | M27  | 5.19  | 6.4744  | -1.28442 |
| 16.1257 | M27  | 8.81  | 8.1532  | 0.65680  |
| 16.1257 | M27  | 7.93  | 8.1532  | -0.22320 |
| 21.5010 | M27  | 10.25 | 9.2049  | 1.04508  |
| 21.5010 | M27  | 10.77 | 9.2049  | 1.56508  |
| 32.2515 | M27  | 10.89 | 10.1342 | 0.75575  |
| 32.2515 | M27  | 10.85 | 10.1342 | 0.71575  |
| 43.0020 | M27  | 10.41 | 10.1915 | 0.21853  |
| 43.0020 | M27  | 10.35 | 10.1915 | 0.15853  |
| 53.7525 | M27  | 9.92  | 9.8269  | 0.09308  |
| 53.7525 | M27  | 9.42  | 9.8269  | -0.40692 |
| 64.5029 | M27  | 9.15  | 9.2632  | -0.11320 |
| 64.5029 | M27  | 9.25  | 9.2632  | -0.01320 |
| 91.3792 | M27  | 7.14  | 7.5984  | -0.45839 |
| 91.3792 | M27  | 7.13  | 7.5984  | -0.46839 |
| 0.7679  | M31  | 0.36  | 0.5261  | -0.16608 |

|         |     |      |        |          |
|---------|-----|------|--------|----------|
| 0.7679  | M31 | 0.33 | 0.5261 | -0.19608 |
| 2.3037  | M31 | 0.55 | 1.4789 | -0.92894 |
| 2.3037  | M31 | 0.64 | 1.4789 | -0.83894 |
| 5.3752  | M31 | 1.94 | 3.0359 | -1.09591 |
| 5.3752  | M31 | 1.62 | 3.0359 | -1.41591 |
| 10.7505 | M31 | 4.22 | 4.8812 | -0.66122 |
| 10.7505 | M31 | 4.37 | 4.8812 | -0.51122 |
| 16.1257 | M31 | 6.31 | 5.9302 | 0.37984  |
| 16.1257 | M31 | 6.85 | 5.9302 | 0.91984  |
| 21.5010 | M31 | 7.05 | 6.4509 | 0.59912  |
| 21.5010 | M31 | 6.84 | 6.4509 | 0.38912  |
| 32.2515 | M31 | 6.53 | 6.5771 | -0.04708 |
| 32.2515 | M31 | 7.11 | 6.5771 | 0.53292  |
| 43.0020 | M31 | 6.06 | 6.1174 | -0.05736 |
| 43.0020 | M31 | 6.05 | 6.1174 | -0.06736 |
| 53.7525 | M31 | 5.50 | 5.4594 | 0.04056  |
| 53.7525 | M31 | 5.07 | 5.4594 | -0.38944 |
| 64.5029 | M31 | 4.94 | 4.7734 | 0.16656  |
| 64.5029 | M31 | 4.39 | 4.7734 | -0.38344 |
| 91.3792 | M31 | 3.64 | 3.2904 | 0.34963  |
| 91.3792 | M31 | 3.55 | 3.2904 | 0.25963  |

## Listing 57: SFO-SFO3b fit to BBA 2.3 data, constant variance

```

mkin version used for fitting: 1.0.4.9000
R version used for fitting: 4.1.0
Date of fit: Mon Jul 26 14:04:05 2021
Date of summary: Mon Jul 26 18:52:54 2021

Equations:
d_DMTA/dt = - k_DMTA * DMTA
d_M23/dt = + f_DMTA_to_M23 * k_DMTA * DMTA - k_M23 * M23
d_M27/dt = + f_DMTA_to_M27 * k_DMTA * DMTA - k_M27 * M27 + k_M31 * M31
d_M31/dt = + f_DMTA_to_M31 * k_DMTA * DMTA - k_M31 * M31

Model predictions using solution type deSolve

Fitted using 1161 model solutions performed in 2.15 s

Error model: Constant variance

Error model algorithm: OLS

Starting values for parameters to be optimised:
      value type
DMTA_0    98.3850 state
k_DMTA     0.1000 deparm
k_M23      0.1001 deparm
k_M27      0.1002 deparm
k_M31      0.1003 deparm
f_DMTA_to_M23 0.2500 deparm
f_DMTA_to_M27 0.2500 deparm
f_DMTA_to_M31 0.2500 deparm

Starting values for the transformed parameters actually optimised:
      value lower upper
DMTA_0    98.385000 -Inf  Inf
log_k_DMTA -2.302585 -Inf  Inf
log_k_M23  -2.301586 -Inf  Inf
log_k_M27  -2.300587 -Inf  Inf
log_k_M31  -2.299590 -Inf  Inf
f_DMTA_ilr_1 0.000000 -Inf  Inf
f_DMTA_ilr_2 0.000000 -Inf  Inf
f_DMTA_ilr_3 0.000000 -Inf  Inf

Fixed parameter values:
      value type
M23_0     0 state
M27_0     0 state
M31_0     0 state

Results:
      AIC      BIC    logLik
325.9916 348.4899 -153.9958

Optimised, transformed parameters with symmetric confidence intervals:
      Estimate Std. Error Lower Upper
DMTA_0    99.9800    0.59900 98.7900 101.2000
log_k_DMTA -2.5560    0.01525 -2.5860 -2.5250
log_k_M23  -3.8940    0.42860 -4.7470 -3.0410
log_k_M27  -3.2110    0.08481 -3.3800 -3.0430
log_k_M31  -3.0970    0.11660 -3.3290 -2.8650
f_DMTA_ilr_1 -0.6937    0.16720 -1.0260 -0.3610
f_DMTA_ilr_2 -0.6862    0.12750 -0.9398 -0.4326
f_DMTA_ilr_3 -1.4880    0.09144 -1.6700 -1.3060
sigma      1.3390    0.09982  1.1410  1.5380

Parameter correlation:

```

|              | DMTA_0       | log_k_DMTA   | log_k_M23    | log_k_M27  | log_k_M31  |
|--------------|--------------|--------------|--------------|------------|------------|
| DMTA_0       | 1.000e+00    | 5.392e-01    | -1.937e-02   | -8.364e-02 | -5.282e-02 |
| log_k_DMTA   | 5.392e-01    | 1.000e+00    | -3.592e-02   | -1.551e-01 | -9.795e-02 |
| log_k_M23    | -1.937e-02   | -3.592e-02   | 1.000e+00    | 5.571e-03  | 3.518e-03  |
| log_k_M27    | -8.364e-02   | -1.551e-01   | 5.571e-03    | 1.000e+00  | 4.002e-01  |
| log_k_M31    | -5.282e-02   | -9.795e-02   | 3.518e-03    | 4.002e-01  | 1.000e+00  |
| f_DMTA_ilr_1 | -5.198e-03   | -9.639e-03   | 7.066e-01    | -1.040e-01 | 2.672e-01  |
| f_DMTA_ilr_2 | 6.891e-03    | 1.278e-02    | 5.345e-01    | -1.725e-01 | -5.885e-01 |
| f_DMTA_ilr_3 | -1.713e-01   | -1.968e-01   | 6.657e-01    | 4.014e-01  | 5.758e-02  |
| sigma        | -4.088e-08   | 5.839e-08    | 1.180e-08    | 9.357e-08  | 1.357e-07  |
|              | f_DMTA_ilr_1 | f_DMTA_ilr_2 | f_DMTA_ilr_3 | sigma      |            |
| DMTA_0       | -5.198e-03   | 6.891e-03    | -1.713e-01   | -4.088e-08 |            |
| log_k_DMTA   | -9.639e-03   | 1.278e-02    | -1.968e-01   | 5.839e-08  |            |
| log_k_M23    | 7.066e-01    | 5.345e-01    | 6.657e-01    | 1.180e-08  |            |
| log_k_M27    | -1.040e-01   | -1.725e-01   | 4.014e-01    | 9.357e-08  |            |
| log_k_M31    | 2.672e-01    | -5.885e-01   | 5.758e-02    | 1.357e-07  |            |
| f_DMTA_ilr_1 | 1.000e+00    | 3.043e-01    | 5.717e-01    | 2.102e-08  |            |
| f_DMTA_ilr_2 | 3.043e-01    | 1.000e+00    | 5.838e-01    | -1.064e-07 |            |
| f_DMTA_ilr_3 | 5.717e-01    | 5.838e-01    | 1.000e+00    | -1.743e-08 |            |
| sigma        | 2.102e-08    | -1.064e-07   | -1.743e-08   | 1.000e+00  |            |

Backtransformed parameters:

Confidence intervals for internally transformed parameters are asymmetric.  
t-test (unrealistically) based on the assumption of normal distribution  
for estimators of untransformed parameters.

|               | Estimate | t value | Pr(>t)     | Lower    | Upper     |
|---------------|----------|---------|------------|----------|-----------|
| DMTA_0        | 99.98000 | 166.900 | 7.313e-105 | 98.79000 | 101.20000 |
| k_DMTA        | 0.07764  | 65.590  | 2.842e-72  | 0.07532  | 0.08003   |
| k_M23         | 0.02036  | 2.333   | 1.106e-02  | 0.00868  | 0.04778   |
| k_M27         | 0.04030  | 11.790  | 1.465e-19  | 0.03404  | 0.04771   |
| k_M31         | 0.04519  | 8.579   | 2.699e-13  | 0.03584  | 0.05699   |
| f_DMTA_to_M23 | 0.05130  | 4.776   | 3.916e-06  | NA       | NA        |
| f_DMTA_to_M27 | 0.13680  | 8.970   | 4.555e-14  | NA       | NA        |
| f_DMTA_to_M31 | 0.19410  | 12.730  | 2.567e-21  | NA       | NA        |
| sigma         | 1.33900  | 13.420  | 1.391e-22  | 1.14100  | 1.53800   |

FOCUS Chi2 error levels in percent:

|          | err.min | n.optim | df |
|----------|---------|---------|----|
| All data | 8.447   | 8       | 37 |
| DMTA     | 4.554   | 2       | 10 |
| M23      | 8.501   | 2       | 9  |
| M27      | 6.783   | 2       | 9  |
| M31      | 14.787  | 2       | 9  |

Resulting formation fractions:

|           | ff     |
|-----------|--------|
| DMTA_M23  | 0.0513 |
| DMTA_M27  | 0.1368 |
| DMTA_M31  | 0.1941 |
| DMTA_sink | 0.6178 |

Estimated disappearance times:

|      | DT50   | DT90   |
|------|--------|--------|
| DMTA | 8.928  | 29.66  |
| M23  | 34.038 | 113.07 |
| M27  | 17.198 | 57.13  |
| M31  | 15.338 | 50.95  |

Data:

|        | time | variable | observed | predicted | residual |
|--------|------|----------|----------|-----------|----------|
| 0.0000 |      | DMTA     | 99.33    | 99.9838   | -0.65377 |
| 0.0000 |      | DMTA     | 97.44    | 99.9838   | -2.54377 |
| 0.6734 |      | DMTA     | 93.73    | 94.8908   | -1.16081 |
| 0.6734 |      | DMTA     | 93.77    | 94.8908   | -1.12081 |
| 2.0202 |      | DMTA     | 87.84    | 85.4700   | 2.37004  |
| 2.0202 |      | DMTA     | 89.82    | 85.4700   | 4.35004  |
| 4.7138 |      | DMTA     | 71.61    | 69.3413   | 2.26867  |
| 4.7138 |      | DMTA     | 71.42    | 69.3413   | 2.07867  |
| 9.4275 |      | DMTA     | 45.60    | 48.0900   | -2.49000 |



|         |      |       |         |          |
|---------|------|-------|---------|----------|
| 9.4275  | DMTA | 45.42 | 48.0900 | -2.67000 |
| 14.1413 | DMTA | 31.12 | 33.3517 | -2.23166 |
| 14.1413 | DMTA | 31.68 | 33.3517 | -1.67166 |
| 18.8550 | DMTA | 23.20 | 23.1302 | 0.06976  |
| 18.8550 | DMTA | 24.13 | 23.1302 | 0.99976  |
| 28.2825 | DMTA | 9.43  | 11.1251 | -1.69514 |
| 28.2825 | DMTA | 9.82  | 11.1251 | -1.30514 |
| 37.7101 | DMTA | 7.08  | 5.3509  | 1.72905  |
| 37.7101 | DMTA | 8.64  | 5.3509  | 3.28905  |
| 47.1376 | DMTA | 4.41  | 2.5737  | 1.83631  |
| 47.1376 | DMTA | 4.78  | 2.5737  | 2.20631  |
| 56.5651 | DMTA | 4.92  | 1.2379  | 3.68211  |
| 56.5651 | DMTA | 5.08  | 1.2379  | 3.84211  |
| 80.1339 | DMTA | 2.13  | 0.1986  | 1.93139  |
| 80.1339 | DMTA | 2.23  | 0.1986  | 2.03139  |
| 0.6734  | M23  | 0.18  | 0.2594  | -0.07945 |
| 0.6734  | M23  | 0.18  | 0.2594  | -0.07945 |
| 2.0202  | M23  | 0.52  | 0.7290  | -0.20899 |
| 2.0202  | M23  | 0.43  | 0.7290  | -0.29899 |
| 4.7138  | M23  | 1.19  | 1.4944  | -0.30436 |
| 4.7138  | M23  | 1.11  | 1.4944  | -0.38436 |
| 9.4275  | M23  | 2.26  | 2.3940  | -0.13396 |
| 9.4275  | M23  | 1.99  | 2.3940  | -0.40396 |
| 14.1413 | M23  | 2.81  | 2.8936  | -0.08360 |
| 14.1413 | M23  | 2.83  | 2.8936  | -0.06360 |
| 18.8550 | M23  | 3.39  | 3.1272  | 0.26277  |
| 18.8550 | M23  | 3.56  | 3.1272  | 0.43277  |
| 28.2825 | M23  | 3.49  | 3.1348  | 0.35520  |
| 28.2825 | M23  | 3.28  | 3.1348  | 0.14520  |
| 37.7101 | M23  | 2.80  | 2.8536  | -0.05360 |
| 37.7101 | M23  | 2.97  | 2.8536  | 0.11640  |
| 47.1376 | M23  | 2.42  | 2.4833  | -0.06326 |
| 47.1376 | M23  | 2.51  | 2.4833  | 0.02674  |
| 56.5651 | M23  | 2.22  | 2.1111  | 0.10888  |
| 56.5651 | M23  | 1.95  | 2.1111  | -0.16112 |
| 80.1339 | M23  | 1.28  | 1.3458  | -0.06585 |
| 80.1339 | M23  | 0.99  | 1.3458  | -0.35585 |
| 0.6734  | M27  | 0.50  | 0.7022  | -0.20221 |
| 0.6734  | M27  | 0.83  | 0.7022  | 0.12779  |
| 2.0202  | M27  | 1.25  | 2.0295  | -0.77948 |
| 2.0202  | M27  | 1.09  | 2.0295  | -0.93948 |
| 4.7138  | M27  | 3.28  | 4.3820  | -1.10203 |
| 4.7138  | M27  | 3.24  | 4.3820  | -1.14203 |
| 9.4275  | M27  | 7.17  | 7.5899  | -0.41986 |
| 9.4275  | M27  | 7.91  | 7.5899  | 0.32014  |
| 14.1413 | M27  | 10.15 | 9.7763  | 0.37369  |
| 14.1413 | M27  | 9.55  | 9.7763  | -0.22631 |
| 18.8550 | M27  | 12.09 | 11.1173 | 0.97271  |
| 18.8550 | M27  | 11.89 | 11.1173 | 0.77271  |
| 28.2825 | M27  | 13.32 | 11.9401 | 1.37992  |
| 28.2825 | M27  | 12.05 | 11.9401 | 0.10992  |
| 37.7101 | M27  | 10.04 | 11.2226 | -1.18255 |
| 37.7101 | M27  | 10.78 | 11.2226 | -0.44255 |
| 47.1376 | M27  | 9.32  | 9.7793  | -0.45929 |
| 47.1376 | M27  | 9.62  | 9.7793  | -0.15929 |
| 56.5651 | M27  | 8.00  | 8.1141  | -0.11415 |
| 56.5651 | M27  | 8.45  | 8.1141  | 0.33585  |
| 80.1339 | M27  | 5.71  | 4.4628  | 1.24718  |
| 80.1339 | M27  | 3.33  | 4.4628  | -1.13282 |
| 0.6734  | M31  | 0.47  | 0.9736  | -0.50365 |
| 0.6734  | M31  | 0.34  | 0.9736  | -0.63365 |
| 2.0202  | M31  | 1.00  | 2.6895  | -1.68949 |
| 2.0202  | M31  | 0.89  | 2.6895  | -1.79949 |
| 4.7138  | M31  | 3.58  | 5.3229  | -1.74290 |
| 4.7138  | M31  | 3.41  | 5.3229  | -1.91290 |
| 9.4275  | M31  | 8.74  | 7.9932  | 0.74679  |
| 9.4275  | M31  | 8.28  | 7.9932  | 0.28679  |
| 14.1413 | M31  | 9.67  | 9.0198  | 0.65018  |
| 14.1413 | M31  | 8.95  | 9.0198  | -0.06982 |

|         |     |       |        |          |
|---------|-----|-------|--------|----------|
| 18.8550 | M31 | 10.34 | 9.0648 | 1.27518  |
| 18.8550 | M31 | 10.00 | 9.0648 | 0.93518  |
| 28.2825 | M31 | 7.89  | 7.7693 | 0.12073  |
| 28.2825 | M31 | 8.13  | 7.7693 | 0.36073  |
| 37.7101 | M31 | 5.06  | 5.9634 | -0.90341 |
| 37.7101 | M31 | 5.54  | 5.9634 | -0.42341 |
| 47.1376 | M31 | 3.79  | 4.3224 | -0.53241 |
| 47.1376 | M31 | 4.11  | 4.3224 | -0.21241 |
| 56.5651 | M31 | 3.11  | 3.0287 | 0.08133  |
| 56.5651 | M31 | 2.98  | 3.0287 | -0.04867 |
| 80.1339 | M31 | 1.78  | 1.1499 | 0.63011  |
| 80.1339 | M31 | 1.55  | 1.1499 | 0.40011  |

**Listing 58:** SFO-SFO3b fit to BBA 2.3 data, two-component error

```

mkin version used for fitting: 1.0.4.9000
R version used for fitting: 4.1.0
Date of fit: Mon Jul 26 14:04:47 2021
Date of summary: Mon Jul 26 18:52:54 2021

Equations:
d_DMTA/dt = - k_DMTA * DMTA
d_M23/dt = + f_DMTA_to_M23 * k_DMTA * DMTA - k_M23 * M23
d_M27/dt = + f_DMTA_to_M27 * k_DMTA * DMTA - k_M27 * M27 + k_M31 * M31
d_M31/dt = + f_DMTA_to_M31 * k_DMTA * DMTA - k_M31 * M31

Model predictions using solution type deSolve

Fitted using 3631 model solutions performed in 7.531 s

Error model: Two-component variance function

Error model algorithm: d_3
Direct fitting and three-step fitting yield approximately the same likelihood

Starting values for parameters to be optimised:
      value  type
DMTA_0    98.3850 state
k_DMTA     0.1000 deparm
k_M23      0.1001 deparm
k_M27      0.1002 deparm
k_M31      0.1003 deparm
f_DMTA_to_M23 0.2500 deparm
f_DMTA_to_M27 0.2500 deparm
f_DMTA_to_M31 0.2500 deparm
sigma_low  0.1000 error
rsd_high   0.1000 error

Starting values for the transformed parameters actually optimised:
      value lower upper
DMTA_0    98.385000 -Inf  Inf
log_k_DMTA -2.302585 -Inf  Inf
log_k_M23  -2.301586 -Inf  Inf
log_k_M27  -2.300587 -Inf  Inf
log_k_M31  -2.299590 -Inf  Inf
f_DMTA_ilr_1 0.000000 -Inf  Inf
f_DMTA_ilr_2 0.000000 -Inf  Inf
f_DMTA_ilr_3 0.000000 -Inf  Inf
sigma_low   0.100000  0    Inf
rsd_high    0.100000  0    Inf

Fixed parameter values:
      value  type
M23_0     0 state
M27_0     0 state
M31_0     0 state

Results:
      AIC      BIC    logLik
314.7269 339.725 -147.3634

Optimised, transformed parameters with symmetric confidence intervals:
      Estimate Std. Error  Lower  Upper
DMTA_0    99.19000    1.422000 96.36000 102.00000
log_k_DMTA -2.56800    0.023010 -2.61300 -2.52200
log_k_M23  -3.88200    0.354400 -4.58700 -3.17700
log_k_M27  -3.20500    0.073180 -3.35000 -3.05900
log_k_M31  -3.09000    0.098840 -3.28600 -2.89300
f_DMTA_ilr_1 -0.69070    0.139800 -0.96890 -0.41250

```

```
f_DMTA_ilr_2 -0.68680 0.107100 -0.90000 -0.47360
f_DMTA_ilr_3 -1.47000 0.083730 -1.63600 -1.30300
sigma_low 1.10800 0.097170 0.91490 1.30200
rsd_high 0.03014 0.009921 0.01039 0.04988
```

Parameter correlation:

```
          DMTA_0 log_k_DMTA log_k_M23 log_k_M27 log_k_M31 f_DMTA_ilr_1
DMTA_0    1.00000 0.73392 -0.04805 -0.18158 -0.12302 -0.017220
log_k_DMTA 0.73392 1.00000 -0.06548 -0.25138 -0.16898 -0.022495
log_k_M23 -0.04805 -0.06548 1.00000 0.01646 0.01107 0.703727
log_k_M27 -0.18158 -0.25138 0.01646 1.00000 0.40905 -0.102434
log_k_M31 -0.12302 -0.16898 0.01107 0.40905 1.00000 0.270915
f_DMTA_ilr_1 -0.01722 -0.02250 0.70373 -0.10243 0.27091 1.000000
f_DMTA_ilr_2 0.01505 0.02103 0.52765 -0.16773 -0.58974 0.286887
f_DMTA_ilr_3 -0.40779 -0.40710 0.62735 0.44205 0.10524 0.518451
sigma_low 0.25118 0.29281 -0.01913 -0.06099 -0.04514 -0.009666
rsd_high -0.48103 -0.54095 0.03535 0.11268 0.08339 0.017855

          f_DMTA_ilr_2 f_DMTA_ilr_3 sigma_low rsd_high
DMTA_0    0.015052 -0.4078 0.251180 -0.481031
log_k_DMTA 0.021027 -0.4071 0.292808 -0.540951
log_k_M23 0.527647 0.6274 -0.019135 0.035351
log_k_M27 -0.167733 0.4420 -0.060989 0.112682
log_k_M31 -0.589742 0.1052 -0.045136 0.083391
f_DMTA_ilr_1 0.286887 0.5185 -0.009666 0.017855
f_DMTA_ilr_2 1.000000 0.5232 0.004508 -0.008331
f_DMTA_ilr_3 0.523246 1.0000 -0.118746 0.219378
sigma_low 0.004508 -0.1187 1.000000 -0.320319
rsd_high -0.008331 0.2194 -0.320319 1.000000
```

Backtransformed parameters:

Confidence intervals for internally transformed parameters are asymmetric.  
t-test (unrealistically) based on the assumption of normal distribution  
for estimators of untransformed parameters.

|               | Estimate | t value | Pr(>t)    | Lower    | Upper     |
|---------------|----------|---------|-----------|----------|-----------|
| DMTA_0        | 99.19000 | 69.760  | 1.013e-73 | 96.36000 | 102.00000 |
| k_DMTA        | 0.07673  | 43.460  | 1.026e-57 | 0.07329  | 0.08032   |
| k_M23         | 0.02061  | 2.821   | 3.014e-03 | 0.01018  | 0.04172   |
| k_M27         | 0.04057  | 13.660  | 6.370e-23 | 0.03507  | 0.04693   |
| k_M31         | 0.04552  | 10.120  | 2.852e-16 | 0.03739  | 0.05541   |
| f_DMTA_to_M23 | 0.05206  | 5.687   | 1.017e-07 | NA       | NA        |
| f_DMTA_to_M27 | 0.13830  | 10.300  | 1.265e-16 | NA       | NA        |
| f_DMTA_to_M31 | 0.19670  | 14.100  | 1.055e-23 | NA       | NA        |
| sigma_low     | 1.10800  | 11.400  | 9.503e-19 | 0.91490  | 1.30200   |
| rsd_high      | 0.03014  | 3.038   | 1.609e-03 | 0.01039  | 0.04988   |

FOCUS Chi2 error levels in percent:

|          | err.min | n.optim | df |
|----------|---------|---------|----|
| All data | 8.535   | 8       | 37 |
| DMTA     | 4.616   | 2       | 10 |
| M23      | 8.406   | 2       | 9  |
| M27      | 6.752   | 2       | 9  |
| M31      | 14.737  | 2       | 9  |

Resulting formation fractions:

```
ff
DMTA_M23 0.05206
DMTA_M27 0.13826
DMTA_M31 0.19674
DMTA_sink 0.61294
```

Estimated disappearance times:

|      | DT50   | DT90   |
|------|--------|--------|
| DMTA | 9.034  | 30.01  |
| M23  | 33.636 | 111.74 |
| M27  | 17.085 | 56.76  |
| M31  | 15.227 | 50.58  |

Data:

time variable observed predicted residual

|         |      |       |         |          |
|---------|------|-------|---------|----------|
| 0.0000  | DMTA | 99.33 | 99.1922 | 0.13778  |
| 0.0000  | DMTA | 97.44 | 99.1922 | -1.75222 |
| 0.6734  | DMTA | 93.73 | 94.1974 | -0.46743 |
| 0.6734  | DMTA | 93.77 | 94.1974 | -0.42743 |
| 2.0202  | DMTA | 87.84 | 84.9497 | 2.89027  |
| 2.0202  | DMTA | 89.82 | 84.9497 | 4.87027  |
| 4.7138  | DMTA | 71.61 | 69.0888 | 2.52117  |
| 4.7138  | DMTA | 71.42 | 69.0888 | 2.33117  |
| 9.4275  | DMTA | 45.60 | 48.1214 | -2.52139 |
| 9.4275  | DMTA | 45.42 | 48.1214 | -2.70139 |
| 14.1413 | DMTA | 31.12 | 33.5173 | -2.39725 |
| 14.1413 | DMTA | 31.68 | 33.5173 | -1.83725 |
| 18.8550 | DMTA | 23.20 | 23.3453 | -0.14526 |
| 18.8550 | DMTA | 24.13 | 23.3453 | 0.78474  |
| 28.2825 | DMTA | 9.43  | 11.3255 | -1.89555 |
| 28.2825 | DMTA | 9.82  | 11.3255 | -1.50555 |
| 37.7101 | DMTA | 7.08  | 5.4944  | 1.58561  |
| 37.7101 | DMTA | 8.64  | 5.4944  | 3.14561  |
| 47.1376 | DMTA | 4.41  | 2.6655  | 1.74449  |
| 47.1376 | DMTA | 4.78  | 2.6655  | 2.11449  |
| 56.5651 | DMTA | 4.92  | 1.2931  | 3.62687  |
| 56.5651 | DMTA | 5.08  | 1.2931  | 3.78687  |
| 80.1339 | DMTA | 2.13  | 0.2120  | 1.91802  |
| 80.1339 | DMTA | 2.23  | 0.2120  | 2.01802  |
| 0.6734  | M23  | 0.18  | 0.2582  | -0.07820 |
| 0.6734  | M23  | 0.18  | 0.2582  | -0.07820 |
| 2.0202  | M23  | 0.52  | 0.7258  | -0.20581 |
| 2.0202  | M23  | 0.43  | 0.7258  | -0.29581 |
| 4.7138  | M23  | 1.19  | 1.4890  | -0.29902 |
| 4.7138  | M23  | 1.11  | 1.4890  | -0.37902 |
| 9.4275  | M23  | 2.26  | 2.3883  | -0.12831 |
| 9.4275  | M23  | 1.99  | 2.3883  | -0.39831 |
| 14.1413 | M23  | 2.81  | 2.8896  | -0.07960 |
| 14.1413 | M23  | 2.83  | 2.8896  | -0.05960 |
| 18.8550 | M23  | 3.39  | 3.1253  | 0.26474  |
| 18.8550 | M23  | 3.56  | 3.1253  | 0.43474  |
| 28.2825 | M23  | 3.49  | 3.1355  | 0.35446  |
| 28.2825 | M23  | 3.28  | 3.1355  | 0.14446  |
| 37.7101 | M23  | 2.80  | 2.8546  | -0.05459 |
| 37.7101 | M23  | 2.97  | 2.8546  | 0.11541  |
| 47.1376 | M23  | 2.42  | 2.4829  | -0.06285 |
| 47.1376 | M23  | 2.51  | 2.4829  | 0.02715  |
| 56.5651 | M23  | 2.22  | 2.1086  | 0.11136  |
| 56.5651 | M23  | 1.95  | 2.1086  | -0.15864 |
| 80.1339 | M23  | 1.28  | 1.3389  | -0.05893 |
| 80.1339 | M23  | 0.99  | 1.3389  | -0.34893 |
| 0.6734  | M27  | 0.50  | 0.6961  | -0.19606 |
| 0.6734  | M27  | 0.83  | 0.6961  | 0.13394  |
| 2.0202  | M27  | 1.25  | 2.0133  | -0.76331 |
| 2.0202  | M27  | 1.09  | 2.0133  | -0.92331 |
| 4.7138  | M27  | 3.28  | 4.3533  | -1.07334 |
| 4.7138  | M27  | 3.24  | 4.3533  | -1.11334 |
| 9.4275  | M27  | 7.17  | 7.5555  | -0.38545 |
| 9.4275  | M27  | 7.91  | 7.5555  | 0.35455  |
| 14.1413 | M27  | 10.15 | 9.7470  | 0.40301  |
| 14.1413 | M27  | 9.55  | 9.7470  | -0.19699 |
| 18.8550 | M27  | 12.09 | 11.0968 | 0.99315  |
| 18.8550 | M27  | 11.89 | 11.0968 | 0.79315  |
| 28.2825 | M27  | 13.32 | 11.9357 | 1.38432  |
| 28.2825 | M27  | 12.05 | 11.9357 | 0.11432  |
| 37.7101 | M27  | 10.04 | 11.2255 | -1.18550 |
| 37.7101 | M27  | 10.78 | 11.2255 | -0.44550 |
| 47.1376 | M27  | 9.32  | 9.7820  | -0.46205 |
| 47.1376 | M27  | 9.62  | 9.7820  | -0.16205 |
| 56.5651 | M27  | 8.00  | 8.1128  | -0.11283 |
| 56.5651 | M27  | 8.45  | 8.1128  | 0.33717  |
| 80.1339 | M27  | 5.71  | 4.4507  | 1.25927  |
| 80.1339 | M27  | 3.33  | 4.4507  | -1.12073 |
| 0.6734  | M31  | 0.47  | 0.9677  | -0.49765 |

|         |     |       |        |          |
|---------|-----|-------|--------|----------|
| 0.6734  | M31 | 0.34  | 0.9677 | -0.62765 |
| 2.0202  | M31 | 1.00  | 2.6740 | -1.67396 |
| 2.0202  | M31 | 0.89  | 2.6740 | -1.78396 |
| 4.7138  | M31 | 3.58  | 5.2960 | -1.71602 |
| 4.7138  | M31 | 3.41  | 5.2960 | -1.88602 |
| 9.4275  | M31 | 8.74  | 7.9621 | 0.77795  |
| 9.4275  | M31 | 8.28  | 7.9621 | 0.31795  |
| 14.1413 | M31 | 9.67  | 8.9938 | 0.67623  |
| 14.1413 | M31 | 8.95  | 8.9938 | -0.04377 |
| 18.8550 | M31 | 10.34 | 9.0465 | 1.29349  |
| 18.8550 | M31 | 10.00 | 9.0465 | 0.95349  |
| 28.2825 | M31 | 7.89  | 7.7638 | 0.12619  |
| 28.2825 | M31 | 8.13  | 7.7638 | 0.36619  |
| 37.7101 | M31 | 5.06  | 5.9639 | -0.90388 |
| 37.7101 | M31 | 5.54  | 5.9639 | -0.42388 |
| 47.1376 | M31 | 3.79  | 4.3239 | -0.53393 |
| 47.1376 | M31 | 4.11  | 4.3239 | -0.21393 |
| 56.5651 | M31 | 3.11  | 3.0291 | 0.08086  |
| 56.5651 | M31 | 2.98  | 3.0291 | -0.04914 |
| 80.1339 | M31 | 1.78  | 1.1475 | 0.63252  |
| 80.1339 | M31 | 1.55  | 1.1475 | 0.40252  |

**Listing 59:** SFO-SFO3b fit to Borstel data, constant variance

```

mkin version used for fitting: 1.0.4.9000
R version used for fitting: 4.1.0
Date of fit: Mon Jul 26 14:04:08 2021
Date of summary: Mon Jul 26 18:52:54 2021

Equations:
d_DMTA/dt = - k_DMTA * DMTA
d_M23/dt = + f_DMTA_to_M23 * k_DMTA * DMTA - k_M23 * M23
d_M27/dt = + f_DMTA_to_M27 * k_DMTA * DMTA - k_M27 * M27 + k_M31 * M31
d_M31/dt = + f_DMTA_to_M31 * k_DMTA * DMTA - k_M31 * M31

Model predictions using solution type deSolve

Fitted using 1266 model solutions performed in 2.065 s

Error model: Constant variance

Error model algorithm: OLS

Starting values for parameters to be optimised:
      value  type
DMTA_0    100.2000 state
k_DMTA      0.1000 deparm
k_M23       0.1001 deparm
k_M27       0.1002 deparm
k_M31       0.1003 deparm
f_DMTA_to_M23 0.2500 deparm
f_DMTA_to_M27 0.2500 deparm
f_DMTA_to_M31 0.2500 deparm

Starting values for the transformed parameters actually optimised:
      value lower upper
DMTA_0    100.200000 -Inf  Inf
log_k_DMTA -2.302585 -Inf  Inf
log_k_M23  -2.301586 -Inf  Inf
log_k_M27  -2.300587 -Inf  Inf
log_k_M31  -2.299590 -Inf  Inf
f_DMTA_ilr_1 0.000000 -Inf  Inf
f_DMTA_ilr_2 0.000000 -Inf  Inf
f_DMTA_ilr_3 0.000000 -Inf  Inf

Fixed parameter values:
      value  type
M23_0      0 state
M27_0      0 state
M31_0      0 state

Results:
      AIC      BIC    logLik
224.0882 243.0861 -103.0441

Optimised, transformed parameters with symmetric confidence intervals:
      Estimate Std. Error   Lower   Upper
DMTA_0    97.21000    0.52540  96.1500  98.2600
log_k_DMTA -3.77900    0.01476  -3.8090 -3.7500
log_k_M23  -7.75000    4.13200 -16.0400  0.5414
log_k_M27  -4.89100    0.77390  -6.4430 -3.3380
log_k_M31  -4.85400    0.58100  -6.0200 -3.6890
f_DMTA_ilr_1 0.61430    0.22800   0.1568  1.0720
f_DMTA_ilr_2 0.01126    0.24480  -0.4800  0.5025
f_DMTA_ilr_3 -1.79800    0.13140  -2.0620 -1.5350
sigma      1.31000    0.11860   1.0720  1.5480

Parameter correlation:

```

|              | DMTA_0       | log_k_DMTA   | log_k_M23    | log_k_M27  | log_k_M31  |
|--------------|--------------|--------------|--------------|------------|------------|
| DMTA_0       | 1.000e+00    | 5.213e-01    | -3.412e-02   | -2.339e-02 | -1.906e-02 |
| log_k_DMTA   | 5.213e-01    | 1.000e+00    | -6.546e-02   | -4.487e-02 | -3.656e-02 |
| log_k_M23    | -3.412e-02   | -6.546e-02   | 1.000e+00    | 2.937e-03  | 2.393e-03  |
| log_k_M27    | -2.339e-02   | -4.487e-02   | 2.937e-03    | 1.000e+00  | 6.766e-01  |
| log_k_M31    | -1.906e-02   | -3.656e-02   | 2.393e-03    | 6.766e-01  | 1.000e+00  |
| f_DMTA_ilr_1 | -2.753e-03   | -5.282e-03   | 2.969e-01    | -3.867e-01 | 2.581e-01  |
| f_DMTA_ilr_2 | 2.439e-03    | 4.678e-03    | 1.591e-01    | -2.675e-01 | -7.802e-01 |
| f_DMTA_ilr_3 | -1.053e-01   | -1.324e-01   | 3.412e-01    | 7.767e-01  | 3.573e-01  |
| sigma        | 3.257e-07    | 2.318e-07    | 5.212e-07    | -1.985e-07 | 2.651e-07  |
|              | f_DMTA_ilr_1 | f_DMTA_ilr_2 | f_DMTA_ilr_3 | sigma      |            |
| DMTA_0       | -2.753e-03   | 2.439e-03    | -1.053e-01   | 3.257e-07  |            |
| log_k_DMTA   | -5.282e-03   | 4.678e-03    | -1.324e-01   | 2.318e-07  |            |
| log_k_M23    | 2.969e-01    | 1.591e-01    | 3.412e-01    | 5.212e-07  |            |
| log_k_M27    | -3.867e-01   | -2.675e-01   | 7.767e-01    | -1.985e-07 |            |
| log_k_M31    | 2.581e-01    | -7.802e-01   | 3.573e-01    | 2.651e-07  |            |
| f_DMTA_ilr_1 | 1.000e+00    | -5.953e-01   | -5.080e-01   | 6.345e-07  |            |
| f_DMTA_ilr_2 | -5.953e-01   | 1.000e+00    | 8.194e-02    | -1.945e-07 |            |
| f_DMTA_ilr_3 | -5.080e-01   | 8.194e-02    | 1.000e+00    | -2.286e-08 |            |
| sigma        | 6.345e-07    | -1.945e-07   | -2.286e-08   | 1.000e+00  |            |

Backtransformed parameters:

Confidence intervals for internally transformed parameters are asymmetric.  
t-test (unrealistically) based on the assumption of normal distribution  
for estimators of untransformed parameters.

|               | Estimate  | t value | Pr(>t)    | Lower     | Upper    |
|---------------|-----------|---------|-----------|-----------|----------|
| DMTA_0        | 9.721e+01 | 185.000 | 2.793e-75 | 9.615e+01 | 98.26000 |
| k_DMTA        | 2.284e-02 | 67.760  | 1.052e-52 | 2.218e-02 | 0.02353  |
| k_M23         | 4.308e-04 | 0.242   | 4.049e-01 | 1.080e-07 | 1.71800  |
| k_M27         | 7.517e-03 | 1.292   | 1.010e-01 | 1.591e-03 | 0.03552  |
| k_M31         | 7.794e-03 | 1.721   | 4.557e-02 | 2.429e-03 | 0.02501  |
| f_DMTA_to_M23 | 1.389e-01 | 9.347   | 5.076e-13 | NA        | NA       |
| f_DMTA_to_M27 | 5.825e-02 | 3.280   | 9.277e-04 | NA        | NA       |
| f_DMTA_to_M31 | 8.870e-02 | 4.594   | 1.401e-05 | NA        | NA       |
| sigma         | 1.310e+00 | 11.050  | 1.501e-15 | 1.072e+00 | 1.54800  |

FOCUS Chi2 error levels in percent:

|          | err.min | n.optim | df |
|----------|---------|---------|----|
| All data | 6.211   | 8       | 21 |
| DMTA     | 2.585   | 2       | 6  |
| M23      | 19.213  | 2       | 5  |
| M27      | 2.694   | 2       | 5  |
| M31      | 5.447   | 2       | 5  |

Resulting formation fractions:

|           | ff      |
|-----------|---------|
| DMTA_M23  | 0.13886 |
| DMTA_M27  | 0.05825 |
| DMTA_M31  | 0.08870 |
| DMTA_sink | 0.71419 |

Estimated disappearance times:

|      | DT50    | DT90   |
|------|---------|--------|
| DMTA | 30.34   | 100.8  |
| M23  | 1608.80 | 5344.3 |
| M27  | 92.21   | 306.3  |
| M31  | 88.93   | 295.4  |

Data:

| time   | variable | observed | predicted | residual  |
|--------|----------|----------|-----------|-----------|
| 0.000  | DMTA     | 100.5    | 97.2083   | 3.291663  |
| 0.000  | DMTA     | 100.5    | 97.2083   | 3.291663  |
| 0.000  | DMTA     | 99.6     | 97.2083   | 2.391663  |
| 1.941  | DMTA     | 91.9     | 92.9919   | -1.091877 |
| 1.941  | DMTA     | 91.3     | 92.9919   | -1.691877 |
| 6.795  | DMTA     | 81.8     | 83.2336   | -1.433617 |
| 6.795  | DMTA     | 82.1     | 83.2336   | -1.133617 |
| 13.589 | DMTA     | 69.1     | 71.2679   | -2.167910 |
| 13.589 | DMTA     | 68.0     | 71.2679   | -3.267910 |



|         |      |      |         |           |
|---------|------|------|---------|-----------|
| 27.178  | DMTA | 51.4 | 52.2498 | -0.849788 |
| 27.178  | DMTA | 51.4 | 52.2498 | -0.849788 |
| 27.178  | DMTA | 51.4 | 52.2498 | -0.849788 |
| 56.298  | DMTA | 26.8 | 26.8663 | -0.066250 |
| 56.298  | DMTA | 27.6 | 26.8663 | 0.733750  |
| 56.298  | DMTA | 26.8 | 26.8663 | -0.066250 |
| 86.388  | DMTA | 15.7 | 13.5114 | 2.188601  |
| 86.388  | DMTA | 15.7 | 13.5114 | 2.188601  |
| 86.388  | DMTA | 15.3 | 13.5114 | 1.788601  |
| 115.507 | DMTA | 7.9  | 6.9474  | 0.952591  |
| 115.507 | DMTA | 7.9  | 6.9474  | 0.952591  |
| 115.507 | DMTA | 8.1  | 6.9474  | 1.152591  |
| 1.941   | M23  | 0.4  | 0.5852  | -0.185245 |
| 1.941   | M23  | 0.5  | 0.5852  | -0.085245 |
| 6.795   | M23  | 1.2  | 1.9376  | -0.737600 |
| 6.795   | M23  | 1.3  | 1.9376  | -0.637600 |
| 13.589  | M23  | 2.8  | 3.5910  | -0.790986 |
| 13.589  | M23  | 2.0  | 3.5910  | -1.590986 |
| 27.178  | M23  | 2.9  | 6.2027  | -3.302741 |
| 27.178  | M23  | 4.9  | 6.2027  | -1.302741 |
| 56.298  | M23  | 12.2 | 9.6257  | 2.574305  |
| 56.298  | M23  | 12.2 | 9.6257  | 2.574305  |
| 86.388  | M23  | 12.2 | 11.3428 | 0.857179  |
| 86.388  | M23  | 12.0 | 11.3428 | 0.657179  |
| 115.507 | M23  | 10.4 | 12.1066 | -1.706551 |
| 115.507 | M23  | 11.6 | 12.1066 | -0.506551 |
| 1.941   | M27  | 0.3  | 0.2466  | 0.053384  |
| 6.795   | M27  | 0.8  | 0.8255  | -0.025516 |
| 6.795   | M27  | 0.9  | 0.8255  | 0.074484  |
| 13.589  | M27  | 1.4  | 1.5519  | -0.151905 |
| 13.589  | M27  | 1.4  | 1.5519  | -0.151905 |
| 27.178  | M27  | 2.7  | 2.7468  | -0.046803 |
| 27.178  | M27  | 2.6  | 2.7468  | -0.146803 |
| 56.298  | M27  | 4.4  | 4.4071  | -0.007133 |
| 56.298  | M27  | 4.7  | 4.4071  | 0.292867  |
| 86.388  | M27  | 5.4  | 5.2322  | 0.167789  |
| 86.388  | M27  | 5.2  | 5.2322  | -0.032211 |
| 115.507 | M27  | 5.4  | 5.4875  | -0.087526 |
| 115.507 | M27  | 5.4  | 5.4875  | -0.087526 |
| 1.941   | M31  | 0.1  | 0.3712  | -0.271168 |
| 6.795   | M31  | 1.0  | 1.2065  | -0.206495 |
| 6.795   | M31  | 0.9  | 1.2065  | -0.306495 |
| 13.589  | M31  | 2.0  | 2.1773  | -0.177312 |
| 13.589  | M31  | 2.5  | 2.1773  | 0.322688  |
| 27.178  | M31  | 4.3  | 3.5548  | 0.745220  |
| 27.178  | M31  | 3.2  | 3.5548  | -0.354780 |
| 56.298  | M31  | 4.3  | 4.8222  | -0.522228 |
| 56.298  | M31  | 4.8  | 4.8222  | -0.022228 |
| 86.388  | M31  | 5.0  | 4.8560  | 0.143983  |
| 86.388  | M31  | 5.1  | 4.8560  | 0.243983  |
| 115.507 | M31  | 4.3  | 4.3844  | -0.084407 |
| 115.507 | M31  | 4.4  | 4.3844  | 0.015593  |

**Listing 60:** SFO-SFO3b fit to Borstel data, two-component error

```

mkin version used for fitting: 1.0.4.9000
R version used for fitting: 4.1.0
Date of fit: Mon Jul 26 14:04:51 2021
Date of summary: Mon Jul 26 18:52:54 2021

Equations:
d_DMTA/dt = - k_DMTA * DMTA
d_M23/dt = + f_DMTA_to_M23 * k_DMTA * DMTA - k_M23 * M23
d_M27/dt = + f_DMTA_to_M27 * k_DMTA * DMTA - k_M27 * M27 + k_M31 * M31
d_M31/dt = + f_DMTA_to_M31 * k_DMTA * DMTA - k_M31 * M31

Model predictions using solution type deSolve

Fitted using 3455 model solutions performed in 6.648 s

Error model: Two-component variance function

Error model algorithm: d_3
Three-step fitting yielded a higher likelihood than direct fitting

Starting values for parameters to be optimised:
      value  type
DMTA_0      100.2000 state
k_DMTA        0.1000 deparm
k_M23         0.1001 deparm
k_M27         0.1002 deparm
k_M31         0.1003 deparm
f_DMTA_to_M23 0.2500 deparm
f_DMTA_to_M27 0.2500 deparm
f_DMTA_to_M31 0.2500 deparm
sigma_low     0.1000 error
rsd_high      0.1000 error

Starting values for the transformed parameters actually optimised:
      value lower upper
DMTA_0    100.2000000 -Inf  Inf
log_k_DMTA -2.302585 -Inf  Inf
log_k_M23  -2.301586 -Inf  Inf
log_k_M27  -2.300587 -Inf  Inf
log_k_M31  -2.299590 -Inf  Inf
f_DMTA_ilr_1 0.000000 -Inf  Inf
f_DMTA_ilr_2 0.000000 -Inf  Inf
f_DMTA_ilr_3 0.000000 -Inf  Inf
sigma_low   0.1000000  0    Inf
rsd_high    0.1000000  0    Inf

Fixed parameter values:
      value type
M23_0     0 state
M27_0     0 state
M31_0     0 state

Results:
      AIC      BIC    logLik
198.2754 219.3842 -89.13772

Optimised, transformed parameters with symmetric confidence intervals:
      Estimate Std. Error   Lower   Upper
DMTA_0      91.60000 3.661e+00 8.425e+01 98.9500
log_k_DMTA  -3.86500 3.260e-02 -3.931e+00 -3.8000
log_k_M23   -25.64000 9.308e+03 -1.871e+04 18660.0000
log_k_M27   -4.80900 2.923e-01 -5.396e+00 -4.2220
log_k_M31   -4.81100 2.107e-01 -5.234e+00 -4.3880
f_DMTA_ilr_1 0.55360 6.652e-02 4.201e-01 0.6872

```

```
f_DMTA_ilmr_2 -0.02246 7.120e-02 -1.654e-01 0.1205
f_DMTA_ilmr_3 -1.72900 8.344e-02 -1.897e+00 -1.5620
sigma_low 0.13070 5.356e-02 2.319e-02 0.2382
rsd_high 0.13400 1.523e-02 1.035e-01 0.1646
```

Parameter correlation:

```
          DMTA_0 log_k_DMTA log_k_M23 log_k_M27 log_k_M31
DMTA_0    1.000e+00 6.927e-01 -7.025e-06 -1.770e-01 -1.274e-01
log_k_DMTA 6.927e-01 1.000e+00 -8.257e-06 -2.668e-01 -2.040e-01
log_k_M23 -7.025e-06 -8.257e-06 1.000e+00 4.112e-06 6.449e-06
log_k_M27 -1.770e-01 -2.668e-01 4.112e-06 1.000e+00 6.676e-01
log_k_M31 -1.274e-01 -2.040e-01 6.449e-06 6.676e-01 1.000e+00
f_DMTA_ilmr_1 1.000e-01 1.264e-01 3.062e-05 -3.426e-01 1.875e-01
f_DMTA_ilmr_2 2.891e-02 6.217e-02 8.128e-06 -2.850e-01 -7.113e-01
f_DMTA_ilmr_3 -8.209e-01 -7.565e-01 2.126e-05 5.330e-01 3.465e-01
sigma_low 1.024e-01 9.153e-02 7.262e-06 1.070e-01 2.174e-01
rsd_high -1.355e-01 -5.449e-02 1.345e-05 -6.333e-02 -1.283e-01
          f_DMTA_ilmr_1 f_DMTA_ilmr_2 f_DMTA_ilmr_3 sigma_low rsd_high
DMTA_0    1.000e-01 2.891e-02 -8.209e-01 1.024e-01 -1.355e-01
log_k_DMTA 1.264e-01 6.217e-02 -7.565e-01 9.153e-02 -5.449e-02
log_k_M23 3.062e-05 8.128e-06 2.126e-05 7.262e-06 1.345e-05
log_k_M27 -3.426e-01 -2.850e-01 5.330e-01 1.070e-01 -6.333e-02
log_k_M31 1.875e-01 -7.113e-01 3.465e-01 2.174e-01 -1.283e-01
f_DMTA_ilmr_1 1.000e+00 -4.773e-01 -2.608e-01 2.213e-01 -1.319e-01
f_DMTA_ilmr_2 -4.773e-01 1.000e+00 -6.556e-02 -2.359e-01 1.385e-01
f_DMTA_ilmr_3 -2.608e-01 -6.556e-02 1.000e+00 2.447e-02 -1.510e-02
sigma_low 2.213e-01 -2.359e-01 2.447e-02 1.000e+00 -3.914e-01
rsd_high -1.319e-01 1.385e-01 -1.510e-02 -3.914e-01 1.000e+00
```

Backtransformed parameters:

Confidence intervals for internally transformed parameters are asymmetric.  
t-test (unrealistically) based on the assumption of normal distribution  
for estimators of untransformed parameters.

```
          Estimate t value Pr(>t) Lower Upper
DMTA_0    9.160e+01 2.457e+01 3.162e-30 84.250000 98.95000
k_DMTA    2.096e-02 2.994e+01 2.518e-34 0.019630 0.02238
k_M23     7.326e-12 3.751e-09 5.000e-01 0.000000 Inf
k_M27     8.154e-03 3.413e+00 6.326e-04 0.004535 0.01466
k_M31     8.136e-03 4.737e+00 8.872e-06 0.005330 0.01242
f_DMTA_to_M23 1.393e-01 9.229e+00 9.243e-13 NA NA
f_DMTA_to_M27 6.367e-02 9.539e+00 3.142e-13 NA NA
f_DMTA_to_M31 9.681e-02 1.078e+01 4.738e-15 NA NA
sigma_low 1.307e-01 2.407e+00 9.879e-03 0.023190 0.23820
rsd_high 1.340e-01 8.149e+00 4.255e-11 0.103500 0.16460
```

FOCUS Chi2 error levels in percent:

```
          err.min n.optim df
All data 10.191      8 21
DMTA     4.954       2 6
M23      20.147      2 5
M27      3.201       2 5
M31      5.733       2 5
```

Resulting formation fractions:

```
          ff
DMTA_M23 0.13931
DMTA_M27 0.06367
DMTA_M31 0.09681
DMTA_sink 0.70021
```

Estimated disappearance times:

```
          DT50 DT90
DMTA 3.307e+01 1.099e+02
M23 9.461e+10 3.143e+11
M27 8.500e+01 2.824e+02
M31 8.519e+01 2.830e+02
```

Data:

```
          time variable observed predicted residual
```

|         |      |       |         |           |
|---------|------|-------|---------|-----------|
| 0.000   | DMTA | 100.5 | 91.6043 | 8.895733  |
| 0.000   | DMTA | 100.5 | 91.6043 | 8.895733  |
| 0.000   | DMTA | 99.6  | 91.6043 | 7.995733  |
| 1.941   | DMTA | 91.9  | 87.9518 | 3.948207  |
| 1.941   | DMTA | 91.3  | 87.9518 | 3.348207  |
| 6.795   | DMTA | 81.8  | 79.4451 | 2.354889  |
| 6.795   | DMTA | 82.1  | 79.4451 | 2.654889  |
| 13.589  | DMTA | 69.1  | 68.8999 | 0.200090  |
| 13.589  | DMTA | 68.0  | 68.8999 | -0.899910 |
| 27.178  | DMTA | 51.4  | 51.8229 | -0.422887 |
| 27.178  | DMTA | 51.4  | 51.8229 | -0.422887 |
| 27.178  | DMTA | 51.4  | 51.8229 | -0.422887 |
| 56.298  | DMTA | 26.8  | 28.1486 | -1.348580 |
| 56.298  | DMTA | 27.6  | 28.1486 | -0.548580 |
| 56.298  | DMTA | 26.8  | 28.1486 | -1.348580 |
| 86.388  | DMTA | 15.7  | 14.9815 | 0.718480  |
| 86.388  | DMTA | 15.7  | 14.9815 | 0.718480  |
| 86.388  | DMTA | 15.3  | 14.9815 | 0.318480  |
| 115.507 | DMTA | 7.9   | 8.1375  | -0.237496 |
| 115.507 | DMTA | 7.9   | 8.1375  | -0.237496 |
| 115.507 | DMTA | 8.1   | 8.1375  | -0.037496 |
| 1.941   | M23  | 0.4   | 0.5088  | -0.108831 |
| 1.941   | M23  | 0.5   | 0.5088  | -0.008831 |
| 6.795   | M23  | 1.2   | 1.6939  | -0.493909 |
| 6.795   | M23  | 1.3   | 1.6939  | -0.393909 |
| 13.589  | M23  | 2.8   | 3.1630  | -0.362976 |
| 13.589  | M23  | 2.0   | 3.1630  | -1.162976 |
| 27.178  | M23  | 2.9   | 5.5420  | -2.641999 |
| 27.178  | M23  | 4.9   | 5.5420  | -0.641999 |
| 56.298  | M23  | 12.2  | 8.8401  | 3.359900  |
| 56.298  | M23  | 12.2  | 8.8401  | 3.359900  |
| 86.388  | M23  | 12.2  | 10.6744 | 1.525578  |
| 86.388  | M23  | 12.0  | 10.6744 | 1.325578  |
| 115.507 | M23  | 10.4  | 11.6279 | -1.227872 |
| 115.507 | M23  | 11.6  | 11.6279 | -0.027872 |
| 1.941   | M27  | 0.3   | 0.2335  | 0.066499  |
| 6.795   | M27  | 0.8   | 0.7847  | 0.015256  |
| 6.795   | M27  | 0.9   | 0.7847  | 0.115256  |
| 13.589  | M27  | 1.4   | 1.4829  | -0.082890 |
| 13.589  | M27  | 1.4   | 1.4829  | -0.082890 |
| 27.178  | M27  | 2.7   | 2.6481  | 0.051875  |
| 27.178  | M27  | 2.6   | 2.6481  | -0.048125 |
| 56.298  | M27  | 4.4   | 4.3068  | 0.093162  |
| 56.298  | M27  | 4.7   | 4.3068  | 0.393162  |
| 86.388  | M27  | 5.4   | 5.1524  | 0.247634  |
| 86.388  | M27  | 5.2   | 5.1524  | 0.047634  |
| 115.507 | M27  | 5.4   | 5.4183  | -0.018302 |
| 115.507 | M27  | 5.4   | 5.4183  | -0.018302 |
| 1.941   | M31  | 0.1   | 0.3508  | -0.250797 |
| 6.795   | M31  | 1.0   | 1.1444  | -0.144423 |
| 6.795   | M31  | 0.9   | 1.1444  | -0.244423 |
| 13.589  | M31  | 2.0   | 2.0754  | -0.075391 |
| 13.589  | M31  | 2.5   | 2.0754  | 0.424609  |
| 27.178  | M31  | 4.3   | 3.4192  | 0.880847  |
| 27.178  | M31  | 3.2   | 3.4192  | -0.219153 |
| 56.298  | M31  | 4.3   | 4.7141  | -0.414137 |
| 56.298  | M31  | 4.8   | 4.7141  | 0.085863  |
| 86.388  | M31  | 5.0   | 4.8067  | 0.193333  |
| 86.388  | M31  | 5.1   | 4.8067  | 0.293333  |
| 115.507 | M31  | 4.3   | 4.3756  | -0.075575 |
| 115.507 | M31  | 4.4   | 4.3756  | 0.024425  |

**Listing 61:** SFO-SFO3b fit to Elliot data, constant variance

```

mkin version used for fitting: 1.0.4.9000
R version used for fitting: 4.1.0
Date of fit: Mon Jul 26 14:04:08 2021
Date of summary: Mon Jul 26 18:52:54 2021

Equations:
d_DMTA/dt = - k_DMTA * DMTA
d_M23/dt = + f_DMTA_to_M23 * k_DMTA * DMTA - k_M23 * M23
d_M27/dt = + f_DMTA_to_M27 * k_DMTA * DMTA - k_M27 * M27 + k_M31 * M31
d_M31/dt = + f_DMTA_to_M31 * k_DMTA * DMTA - k_M31 * M31

Model predictions using solution type deSolve

Fitted using 1232 model solutions performed in 1.82 s

Error model: Constant variance

Error model algorithm: OLS

Starting values for parameters to be optimised:
      value type
DMTA_0    98.7000 state
k_DMTA     0.1000 deparm
k_M23      0.1001 deparm
k_M27      0.1002 deparm
k_M31      0.1003 deparm
f_DMTA_to_M23 0.2500 deparm
f_DMTA_to_M27 0.2500 deparm
f_DMTA_to_M31 0.2500 deparm

Starting values for the transformed parameters actually optimised:
      value lower upper
DMTA_0    98.700000 -Inf  Inf
log_k_DMTA -2.302585 -Inf  Inf
log_k_M23  -2.301586 -Inf  Inf
log_k_M27  -2.300587 -Inf  Inf
log_k_M31  -2.299590 -Inf  Inf
f_DMTA_ilr_1 0.000000 -Inf  Inf
f_DMTA_ilr_2 0.000000 -Inf  Inf
f_DMTA_ilr_3 0.000000 -Inf  Inf

Fixed parameter values:
      value type
M23_0     0 state
M27_0     0 state
M31_0     0 state

Results:
      AIC    BIC  logLik
770.0389 798.261 -376.0194

Optimised, transformed parameters with symmetric confidence intervals:
      Estimate Std. Error Lower Upper
DMTA_0    95.51000    0.75620 94.0100 97.0000
log_k_DMTA -2.82900    0.02117 -2.8710 -2.7880
log_k_M23  -3.87900    0.25630 -4.3850 -3.3730
log_k_M27  -4.40000    0.16010 -4.7170 -4.0840
log_k_M31  -4.62800    0.23060 -5.0830 -4.1730
f_DMTA_ilr_1 0.09136    0.11890 -0.1434 0.3262
f_DMTA_ilr_2 0.05021    0.11440 -0.1758 0.2762
f_DMTA_ilr_3 -1.47200    0.08428 -1.6380 -1.3050
sigma      2.21000    0.11980 1.9730 2.4470

Parameter correlation:

```

|              | DMTA_0       | log_k_DMTA   | log_k_M23    | log_k_M27  | log_k_M31  |
|--------------|--------------|--------------|--------------|------------|------------|
| DMTA_0       | 1.000e+00    | 5.524e-01    | -4.524e-02   | -5.351e-02 | -2.663e-02 |
| log_k_DMTA   | 5.524e-01    | 1.000e+00    | -8.189e-02   | -9.686e-02 | -4.821e-02 |
| log_k_M23    | -4.524e-02   | -8.189e-02   | 1.000e+00    | 7.933e-03  | 3.948e-03  |
| log_k_M27    | -5.351e-02   | -9.686e-02   | 7.933e-03    | 1.000e+00  | 5.123e-01  |
| log_k_M31    | -2.663e-02   | -4.821e-02   | 3.948e-03    | 5.123e-01  | 1.000e+00  |
| f_DMTA_ilr_1 | -1.828e-02   | -3.310e-02   | 6.692e-01    | -1.907e-01 | 2.109e-01  |
| f_DMTA_ilr_2 | -1.681e-02   | -3.043e-02   | 4.023e-01    | -2.555e-01 | -6.587e-01 |
| f_DMTA_ilr_3 | -2.214e-01   | -2.423e-01   | 6.329e-01    | 4.683e-01  | 2.196e-01  |
| sigma        | -1.165e-07   | -8.492e-08   | 4.170e-08    | 8.217e-08  | 8.830e-08  |
|              | f_DMTA_ilr_1 | f_DMTA_ilr_2 | f_DMTA_ilr_3 | sigma      |            |
| DMTA_0       | -1.828e-02   | -1.681e-02   | -2.214e-01   | -1.165e-07 |            |
| log_k_DMTA   | -3.310e-02   | -3.043e-02   | -2.423e-01   | -8.492e-08 |            |
| log_k_M23    | 6.692e-01    | 4.023e-01    | 6.329e-01    | 4.170e-08  |            |
| log_k_M27    | -1.907e-01   | -2.555e-01   | 4.683e-01    | 8.217e-08  |            |
| log_k_M31    | 2.109e-01    | -6.587e-01   | 2.196e-01    | 8.830e-08  |            |
| f_DMTA_ilr_1 | 1.000e+00    | 5.863e-02    | 3.833e-01    | 2.129e-08  |            |
| f_DMTA_ilr_2 | 5.863e-02    | 1.000e+00    | 2.394e-01    | -5.488e-08 |            |
| f_DMTA_ilr_3 | 3.833e-01    | 2.394e-01    | 1.000e+00    | 7.634e-08  |            |
| sigma        | 2.129e-08    | -5.488e-08   | 7.634e-08    | 1.000e+00  |            |

Backtransformed parameters:

Confidence intervals for internally transformed parameters are asymmetric.  
t-test (unrealistically) based on the assumption of normal distribution  
for estimators of untransformed parameters.

|               | Estimate  | t value | Pr(>t)     | Lower     | Upper     |
|---------------|-----------|---------|------------|-----------|-----------|
| DMTA_0        | 95.510000 | 126.300 | 2.973e-163 | 94.010000 | 97.000000 |
| k_DMTA        | 0.059050  | 47.240  | 1.471e-96  | 0.056630  | 0.06157   |
| k_M23         | 0.020680  | 3.901   | 7.010e-05  | 0.012460  | 0.03430   |
| k_M27         | 0.012270  | 6.245   | 1.811e-09  | 0.008946  | 0.01684   |
| k_M31         | 0.009773  | 4.337   | 1.271e-05  | 0.006198  | 0.01541   |
| f_DMTA_to_M23 | 0.128500  | 7.307   | 5.992e-12  | NA        | NA        |
| f_DMTA_to_M27 | 0.112900  | 9.919   | 1.072e-18  | NA        | NA        |
| f_DMTA_to_M31 | 0.113300  | 10.040  | 5.169e-19  | NA        | NA        |
| sigma         | 2.210000  | 18.440  | 7.804e-42  | 1.973000  | 2.44700   |

FOCUS Chi2 error levels in percent:

|          | err.min | n.optim | df |
|----------|---------|---------|----|
| All data | 12.989  | 8       | 35 |
| DMTA     | 7.787   | 2       | 10 |
| M23      | 12.150  | 2       | 8  |
| M27      | 7.233   | 2       | 8  |
| M31      | 15.780  | 2       | 9  |

Resulting formation fractions:

|           | ff     |
|-----------|--------|
| DMTA_M23  | 0.1285 |
| DMTA_M27  | 0.1129 |
| DMTA_M31  | 0.1133 |
| DMTA_sink | 0.6454 |

Estimated disappearance times:

|      | DT50  | DT90  |
|------|-------|-------|
| DMTA | 11.74 | 39.0  |
| M23  | 33.52 | 111.4 |
| M27  | 56.47 | 187.6 |
| M31  | 70.92 | 235.6 |

Data:

|       | time | variable | observed | predicted | residual  |
|-------|------|----------|----------|-----------|-----------|
| 0.000 |      | DMTA     | 97.5     | 9.551e+01 | 1.993961  |
| 0.000 |      | DMTA     | 100.7    | 9.551e+01 | 5.193961  |
| 0.000 |      | DMTA     | 93.4     | 9.551e+01 | -2.106039 |
| 0.000 |      | DMTA     | 103.2    | 9.551e+01 | 7.693961  |
| 1.228 |      | DMTA     | 86.4     | 8.882e+01 | -2.423676 |
| 1.228 |      | DMTA     | 88.5     | 8.882e+01 | -0.323676 |
| 1.228 |      | DMTA     | 89.2     | 8.882e+01 | 0.376324  |
| 1.228 |      | DMTA     | 86.6     | 8.882e+01 | -2.223676 |
| 3.685 |      | DMTA     | 69.8     | 7.683e+01 | -7.028890 |

|         |      |      |           |           |
|---------|------|------|-----------|-----------|
| 3.685   | DMTA | 77.1 | 7.683e+01 | 0.271110  |
| 3.685   | DMTA | 78.2 | 7.683e+01 | 1.371110  |
| 3.685   | DMTA | 78.1 | 7.683e+01 | 1.271110  |
| 8.599   | DMTA | 59.0 | 5.748e+01 | 1.520075  |
| 8.599   | DMTA | 54.2 | 5.748e+01 | -3.279925 |
| 8.599   | DMTA | 55.6 | 5.748e+01 | -1.879925 |
| 8.599   | DMTA | 53.0 | 5.748e+01 | -4.479925 |
| 17.199  | DMTA | 31.3 | 3.459e+01 | -3.294062 |
| 17.199  | DMTA | 33.5 | 3.459e+01 | -1.094062 |
| 17.199  | DMTA | 33.7 | 3.459e+01 | -0.894062 |
| 17.199  | DMTA | 33.2 | 3.459e+01 | -1.394062 |
| 25.798  | DMTA | 19.6 | 2.082e+01 | -1.220297 |
| 25.798  | DMTA | 20.9 | 2.082e+01 | 0.079703  |
| 25.798  | DMTA | 20.9 | 2.082e+01 | 0.079703  |
| 25.798  | DMTA | 19.9 | 2.082e+01 | -0.920297 |
| 34.397  | DMTA | 13.3 | 1.253e+01 | 0.769388  |
| 34.397  | DMTA | 15.8 | 1.253e+01 | 3.269388  |
| 34.397  | DMTA | 18.2 | 1.253e+01 | 5.669388  |
| 34.397  | DMTA | 12.7 | 1.253e+01 | 0.169388  |
| 51.596  | DMTA | 6.7  | 4.539e+00 | 2.161180  |
| 51.596  | DMTA | 8.7  | 4.539e+00 | 4.161180  |
| 51.596  | DMTA | 7.8  | 4.539e+00 | 3.261180  |
| 51.596  | DMTA | 9.0  | 4.539e+00 | 4.461180  |
| 68.795  | DMTA | 8.8  | 1.644e+00 | 7.155955  |
| 68.795  | DMTA | 8.7  | 1.644e+00 | 7.055955  |
| 68.795  | DMTA | 11.4 | 1.644e+00 | 9.755955  |
| 68.795  | DMTA | 9.0  | 1.644e+00 | 7.355955  |
| 103.192 | DMTA | 6.0  | 2.157e-01 | 5.784298  |
| 103.192 | DMTA | 4.4  | 2.157e-01 | 4.184298  |
| 103.192 | DMTA | 3.9  | 2.157e-01 | 3.684298  |
| 103.192 | DMTA | 4.4  | 2.157e-01 | 4.184298  |
| 146.189 | DMTA | 3.3  | 1.703e-02 | 3.282967  |
| 146.189 | DMTA | 2.8  | 1.703e-02 | 2.782967  |
| 146.189 | DMTA | 2.6  | 1.703e-02 | 2.582967  |
| 146.189 | DMTA | 3.4  | 1.703e-02 | 3.382967  |
| 223.583 | DMTA | 1.4  | 1.765e-04 | 1.399824  |
| 223.583 | DMTA | 1.8  | 1.765e-04 | 1.799824  |
| 223.583 | DMTA | 2.0  | 1.765e-04 | 1.999824  |
| 223.583 | DMTA | 1.7  | 1.765e-04 | 1.699824  |
| 3.685   | M23  | 2.8  | 2.307e+00 | 0.492749  |
| 3.685   | M23  | 1.7  | 2.307e+00 | -0.607251 |
| 3.685   | M23  | 2.6  | 2.307e+00 | 0.292749  |
| 3.685   | M23  | 2.4  | 2.307e+00 | 0.092749  |
| 8.599   | M23  | 4.3  | 4.442e+00 | -0.142332 |
| 8.599   | M23  | 5.8  | 4.442e+00 | 1.357668  |
| 8.599   | M23  | 5.5  | 4.442e+00 | 1.057668  |
| 8.599   | M23  | 5.6  | 4.442e+00 | 1.157668  |
| 17.199  | M23  | 8.2  | 6.392e+00 | 1.807703  |
| 17.199  | M23  | 5.2  | 6.392e+00 | -1.192297 |
| 17.199  | M23  | 7.3  | 6.392e+00 | 0.907703  |
| 17.199  | M23  | 6.5  | 6.392e+00 | 0.107703  |
| 25.798  | M23  | 5.1  | 6.960e+00 | -1.860118 |
| 25.798  | M23  | 6.1  | 6.960e+00 | -0.860118 |
| 25.798  | M23  | 5.8  | 6.960e+00 | -1.160118 |
| 25.798  | M23  | 7.7  | 6.960e+00 | 0.739882  |
| 34.397  | M23  | 6.0  | 6.795e+00 | -0.794776 |
| 34.397  | M23  | 6.0  | 6.795e+00 | -0.794776 |
| 34.397  | M23  | 7.8  | 6.795e+00 | 1.005224  |
| 34.397  | M23  | 7.3  | 6.795e+00 | 0.505224  |
| 51.596  | M23  | 5.0  | 5.600e+00 | -0.600087 |
| 51.596  | M23  | 4.2  | 5.600e+00 | -1.400087 |
| 51.596  | M23  | 7.0  | 5.600e+00 | 1.399913  |
| 51.596  | M23  | 6.3  | 5.600e+00 | 0.699913  |
| 68.795  | M23  | 3.9  | 4.228e+00 | -0.328017 |
| 68.795  | M23  | 2.9  | 4.228e+00 | -1.328017 |
| 68.795  | M23  | 4.3  | 4.228e+00 | 0.071983  |
| 68.795  | M23  | 3.8  | 4.228e+00 | -0.428017 |
| 103.192 | M23  | 1.9  | 2.193e+00 | -0.293104 |
| 103.192 | M23  | 1.5  | 2.193e+00 | -0.693104 |

|         |     |      |           |           |
|---------|-----|------|-----------|-----------|
| 103.192 | M23 | 2.6  | 2.193e+00 | 0.406896  |
| 103.192 | M23 | 2.8  | 2.193e+00 | 0.606896  |
| 146.189 | M23 | 2.0  | 9.156e-01 | 1.084352  |
| 146.189 | M23 | 2.3  | 9.156e-01 | 1.384352  |
| 146.189 | M23 | 1.6  | 9.156e-01 | 0.684352  |
| 146.189 | M23 | 1.1  | 9.156e-01 | 0.184352  |
| 223.583 | M23 | 1.2  | 1.855e-01 | 1.014536  |
| 223.583 | M23 | 1.9  | 1.855e-01 | 1.714536  |
| 223.583 | M23 | 1.4  | 1.855e-01 | 1.214536  |
| 223.583 | M23 | 1.3  | 1.855e-01 | 1.114536  |
| 3.685   | M27 | 2.3  | 2.098e+00 | 0.201530  |
| 3.685   | M27 | 2.1  | 2.098e+00 | 0.001530  |
| 3.685   | M27 | 1.0  | 2.098e+00 | -1.098470 |
| 3.685   | M27 | 2.6  | 2.098e+00 | 0.501530  |
| 8.599   | M27 | 4.0  | 4.240e+00 | -0.240199 |
| 8.599   | M27 | 3.4  | 4.240e+00 | -0.840199 |
| 8.599   | M27 | 4.5  | 4.240e+00 | 0.259801  |
| 8.599   | M27 | 4.6  | 4.240e+00 | 0.359801  |
| 17.199  | M27 | 6.6  | 6.682e+00 | -0.082069 |
| 17.199  | M27 | 6.9  | 6.682e+00 | 0.217931  |
| 17.199  | M27 | 7.6  | 6.682e+00 | 0.917931  |
| 17.199  | M27 | 6.7  | 6.682e+00 | 0.017931  |
| 25.798  | M27 | 8.2  | 8.027e+00 | 0.172715  |
| 25.798  | M27 | 8.8  | 8.027e+00 | 0.772715  |
| 25.798  | M27 | 8.7  | 8.027e+00 | 0.672715  |
| 25.798  | M27 | 7.6  | 8.027e+00 | -0.427285 |
| 34.397  | M27 | 9.7  | 8.702e+00 | 0.998373  |
| 34.397  | M27 | 8.8  | 8.702e+00 | 0.098373  |
| 34.397  | M27 | 8.0  | 8.702e+00 | -0.701627 |
| 34.397  | M27 | 8.6  | 8.702e+00 | -0.101627 |
| 51.596  | M27 | 8.3  | 8.974e+00 | -0.673883 |
| 51.596  | M27 | 9.2  | 8.974e+00 | 0.226117  |
| 51.596  | M27 | 7.4  | 8.974e+00 | -1.573883 |
| 51.596  | M27 | 7.2  | 8.974e+00 | -1.773883 |
| 68.795  | M27 | 9.3  | 8.587e+00 | 0.713250  |
| 68.795  | M27 | 8.5  | 8.587e+00 | -0.086750 |
| 68.795  | M27 | 10.3 | 8.587e+00 | 1.713250  |
| 68.795  | M27 | 9.4  | 8.587e+00 | 0.813250  |
| 103.192 | M27 | 8.6  | 7.251e+00 | 1.348953  |
| 103.192 | M27 | 6.0  | 7.251e+00 | -1.251047 |
| 103.192 | M27 | 6.5  | 7.251e+00 | -0.751047 |
| 103.192 | M27 | 6.9  | 7.251e+00 | -0.351047 |
| 146.189 | M27 | 5.6  | 5.528e+00 | 0.072272  |
| 146.189 | M27 | 4.5  | 5.528e+00 | -1.027728 |
| 146.189 | M27 | 4.6  | 5.528e+00 | -0.927728 |
| 146.189 | M27 | 4.5  | 5.528e+00 | -1.027728 |
| 223.583 | M27 | 4.1  | 3.141e+00 | 0.958764  |
| 223.583 | M27 | 3.9  | 3.141e+00 | 0.758764  |
| 223.583 | M27 | 4.3  | 3.141e+00 | 1.158764  |
| 223.583 | M27 | 4.2  | 3.141e+00 | 1.058764  |
| 1.228   | M31 | 1.5  | 7.522e-01 | 0.747756  |
| 1.228   | M31 | 1.3  | 7.522e-01 | 0.547756  |
| 3.685   | M31 | 5.0  | 2.076e+00 | 2.923683  |
| 3.685   | M31 | 2.4  | 2.076e+00 | 0.323683  |
| 3.685   | M31 | 3.1  | 2.076e+00 | 1.023683  |
| 3.685   | M31 | 2.3  | 2.076e+00 | 0.223683  |
| 8.599   | M31 | 4.3  | 4.116e+00 | 0.183907  |
| 8.599   | M31 | 5.0  | 4.116e+00 | 0.883907  |
| 8.599   | M31 | 3.4  | 4.116e+00 | -0.716093 |
| 8.599   | M31 | 4.3  | 4.116e+00 | 0.183907  |
| 17.199  | M31 | 8.0  | 6.262e+00 | 1.738446  |
| 17.199  | M31 | 7.7  | 6.262e+00 | 1.438446  |
| 17.199  | M31 | 7.8  | 6.262e+00 | 1.538446  |
| 17.199  | M31 | 8.7  | 6.262e+00 | 2.438446  |
| 25.798  | M31 | 7.8  | 7.248e+00 | 0.552256  |
| 25.798  | M31 | 6.5  | 7.248e+00 | -0.747744 |
| 25.798  | M31 | 7.7  | 7.248e+00 | 0.452256  |
| 25.798  | M31 | 6.5  | 7.248e+00 | -0.747744 |
| 34.397  | M31 | 8.0  | 7.561e+00 | 0.439179  |



|         |     |     |           |           |
|---------|-----|-----|-----------|-----------|
| 34.397  | M31 | 7.4 | 7.561e+00 | -0.160821 |
| 34.397  | M31 | 6.3 | 7.561e+00 | -1.260821 |
| 34.397  | M31 | 8.7 | 7.561e+00 | 1.139179  |
| 51.596  | M31 | 6.9 | 7.213e+00 | -0.312546 |
| 51.596  | M31 | 9.0 | 7.213e+00 | 1.787454  |
| 51.596  | M31 | 5.7 | 7.213e+00 | -1.512546 |
| 51.596  | M31 | 4.2 | 7.213e+00 | -3.012546 |
| 68.795  | M31 | 5.5 | 6.394e+00 | -0.894198 |
| 68.795  | M31 | 6.1 | 6.394e+00 | -0.294198 |
| 68.795  | M31 | 3.2 | 6.394e+00 | -3.194198 |
| 68.795  | M31 | 4.2 | 6.394e+00 | -2.194198 |
| 103.192 | M31 | 6.1 | 4.699e+00 | 1.401198  |
| 103.192 | M31 | 4.0 | 4.699e+00 | -0.698802 |
| 103.192 | M31 | 3.8 | 4.699e+00 | -0.898802 |
| 103.192 | M31 | 4.0 | 4.699e+00 | -0.698802 |
| 146.189 | M31 | 3.1 | 3.104e+00 | -0.003584 |
| 146.189 | M31 | 2.9 | 3.104e+00 | -0.203584 |
| 146.189 | M31 | 4.5 | 3.104e+00 | 1.396416  |
| 146.189 | M31 | 4.5 | 3.104e+00 | 1.396416  |
| 223.583 | M31 | 1.8 | 1.458e+00 | 0.342248  |
| 223.583 | M31 | 2.6 | 1.458e+00 | 1.142248  |
| 223.583 | M31 | 3.8 | 1.458e+00 | 2.342248  |
| 223.583 | M31 | 2.3 | 1.458e+00 | 0.842248  |

**Listing 62:** SFO-SFO3b fit to Elliot data, two-component error

```

mkin version used for fitting: 1.0.4.9000
R version used for fitting: 4.1.0
Date of fit: Mon Jul 26 14:04:57 2021
Date of summary: Mon Jul 26 18:52:54 2021

Equations:
d_DMTA/dt = - k_DMTA * DMTA
d_M23/dt = + f_DMTA_to_M23 * k_DMTA * DMTA - k_M23 * M23
d_M27/dt = + f_DMTA_to_M27 * k_DMTA * DMTA - k_M27 * M27 + k_M31 * M31
d_M31/dt = + f_DMTA_to_M31 * k_DMTA * DMTA - k_M31 * M31

Model predictions using solution type deSolve

Fitted using 4712 model solutions performed in 6.724 s

Error model: Two-component variance function

Error model algorithm: d_3
Three-step fitting yielded a higher likelihood than direct fitting

Starting values for parameters to be optimised:
      value  type
DMTA_0      98.7000 state
k_DMTA       0.1000 deparm
k_M23        0.1001 deparm
k_M27        0.1002 deparm
k_M31        0.1003 deparm
f_DMTA_to_M23 0.2500 deparm
f_DMTA_to_M27 0.2500 deparm
f_DMTA_to_M31 0.2500 deparm
sigma_low    0.1000 error
rsd_high     0.1000 error

Starting values for the transformed parameters actually optimised:
      value lower upper
DMTA_0      98.700000 -Inf  Inf
log_k_DMTA  -2.302585 -Inf  Inf
log_k_M23   -2.301586 -Inf  Inf
log_k_M27   -2.300587 -Inf  Inf
log_k_M31   -2.299590 -Inf  Inf
f_DMTA_ilr_1 0.000000 -Inf  Inf
f_DMTA_ilr_2 0.000000 -Inf  Inf
f_DMTA_ilr_3 0.000000 -Inf  Inf
sigma_low    0.100000  0    Inf
rsd_high     0.100000  0    Inf

Fixed parameter values:
      value  type
M23_0      0 state
M27_0      0 state
M31_0      0 state

Results:
      AIC      BIC    logLik
758.2828 789.6408 -369.1414

Optimised, transformed parameters with symmetric confidence intervals:
      Estimate Std. Error  Lower  Upper
DMTA_0      93.63000    1.53500  90.60000  96.66000
log_k_DMTA  -2.87900    0.03197 -2.94300 -2.81600
log_k_M23   -3.82900    0.23110 -4.28600 -3.37300
log_k_M27   -4.36500    0.14390 -4.64900 -4.08000
log_k_M31   -4.60400    0.20530 -5.01000 -4.19900
f_DMTA_ilr_1 0.10110    0.10860 -0.11350  0.31560

```

```
f_DMTA_ilr_2 0.05865 0.10380 -0.14640 0.26370
f_DMTA_ilr_3 -1.41100 0.08732 -1.58300 -1.23800
sigma_low 1.96900 0.12050 1.73100 2.20700
rsd_high 0.04134 0.01181 0.01801 0.06466
```

Parameter correlation:

```
          DMTA_0 log_k_DMTA log_k_M23 log_k_M27 log_k_M31 f_DMTA_ilr_1
DMTA_0    1.00000 0.73617 -0.10320 -0.11983 -0.05787 -0.04334
log_k_DMTA 0.73617 1.00000 -0.14034 -0.16337 -0.07951 -0.05883
log_k_M23 -0.10320 -0.14034 1.00000 0.02293 0.01117 0.67595
log_k_M27 -0.11983 -0.16337 0.02293 1.00000 0.50952 -0.18806
log_k_M31 -0.05787 -0.07951 0.01117 0.50952 1.00000 0.20949
f_DMTA_ilr_1 -0.04334 -0.05883 0.67595 -0.18806 0.20949 1.00000
f_DMTA_ilr_2 -0.03911 -0.05312 0.41085 -0.24009 -0.65198 0.06804
f_DMTA_ilr_3 -0.45254 -0.45508 0.62251 0.47259 0.22303 0.37104
sigma_low 0.23882 0.29088 -0.04039 -0.04587 -0.02066 -0.01721
rsd_high -0.52836 -0.61509 0.08542 0.09699 0.04369 0.03639

          f_DMTA_ilr_2 f_DMTA_ilr_3 sigma_low rsd_high
DMTA_0    -0.03911 -0.4525 0.23882 -0.52836
log_k_DMTA -0.05312 -0.4551 0.29088 -0.61509
log_k_M23 0.41085 0.6225 -0.04039 0.08542
log_k_M27 -0.24009 0.4726 -0.04587 0.09699
log_k_M31 -0.65198 0.2230 -0.02066 0.04369
f_DMTA_ilr_1 0.06804 0.3710 -0.01721 0.03639
f_DMTA_ilr_2 1.00000 0.2425 -0.01548 0.03272
f_DMTA_ilr_3 0.24250 1.0000 -0.13824 0.29231
sigma_low -0.01548 -0.1382 1.00000 -0.28650
rsd_high 0.03272 0.2923 -0.28650 1.00000
```

Backtransformed parameters:

Confidence intervals for internally transformed parameters are asymmetric.  
t-test (unrealistically) based on the assumption of normal distribution  
for estimators of untransformed parameters.

|               | Estimate | t value | Pr(>t)     | Lower     | Upper    |
|---------------|----------|---------|------------|-----------|----------|
| DMTA_0        | 93.63000 | 61.010  | 5.147e-113 | 90.600000 | 96.66000 |
| k_DMTA        | 0.05617  | 31.280  | 2.244e-70  | 0.052730  | 0.05983  |
| k_M23         | 0.02173  | 4.326   | 1.331e-05  | 0.013770  | 0.03430  |
| k_M27         | 0.01272  | 6.947   | 4.440e-11  | 0.009573  | 0.01690  |
| k_M31         | 0.01001  | 4.871   | 1.324e-06  | 0.006672  | 0.01501  |
| f_DMTA_to_M23 | 0.13570  | 7.738   | 5.356e-13  | NA        | NA       |
| f_DMTA_to_M27 | 0.11770  | 10.530  | 2.560e-20  | NA        | NA       |
| f_DMTA_to_M31 | 0.11760  | 10.750  | 6.413e-21  | NA        | NA       |
| sigma_low     | 1.96900  | 16.340  | 3.130e-36  | 1.731000  | 2.20700  |
| rsd_high      | 0.04134  | 3.500   | 3.017e-04  | 0.018010  | 0.06466  |

FOCUS Chi2 error levels in percent:

|          | err.min | n.optim | df |
|----------|---------|---------|----|
| All data | 13.386  | 8       | 35 |
| DMTA     | 8.020   | 2       | 10 |
| M23      | 12.502  | 2       | 8  |
| M27      | 7.436   | 2       | 8  |
| M31      | 16.411  | 2       | 9  |

Resulting formation fractions:

```
ff
DMTA_M23 0.1357
DMTA_M27 0.1177
DMTA_M31 0.1176
DMTA_sink 0.6290
```

Estimated disappearance times:

|      | DT50  | DT90   |
|------|-------|--------|
| DMTA | 12.34 | 40.99  |
| M23  | 31.90 | 105.96 |
| M27  | 54.49 | 181.02 |
| M31  | 69.26 | 230.06 |

Data:

| time variable | observed | predicted | residual |
|---------------|----------|-----------|----------|
|---------------|----------|-----------|----------|

|         |      |       |           |           |
|---------|------|-------|-----------|-----------|
| 0.000   | DMTA | 97.5  | 9.363e+01 | 3.866039  |
| 0.000   | DMTA | 100.7 | 9.363e+01 | 7.066039  |
| 0.000   | DMTA | 93.4  | 9.363e+01 | -0.233961 |
| 0.000   | DMTA | 103.2 | 9.363e+01 | 9.566039  |
| 1.228   | DMTA | 86.4  | 8.739e+01 | -0.990889 |
| 1.228   | DMTA | 88.5  | 8.739e+01 | 1.109111  |
| 1.228   | DMTA | 89.2  | 8.739e+01 | 1.809111  |
| 1.228   | DMTA | 86.6  | 8.739e+01 | -0.790889 |
| 3.685   | DMTA | 69.8  | 7.613e+01 | -6.325768 |
| 3.685   | DMTA | 77.1  | 7.613e+01 | 0.974232  |
| 3.685   | DMTA | 78.2  | 7.613e+01 | 2.074232  |
| 3.685   | DMTA | 78.1  | 7.613e+01 | 1.974232  |
| 8.599   | DMTA | 59.0  | 5.776e+01 | 1.235271  |
| 8.599   | DMTA | 54.2  | 5.776e+01 | -3.564729 |
| 8.599   | DMTA | 55.6  | 5.776e+01 | -2.164729 |
| 8.599   | DMTA | 53.0  | 5.776e+01 | -4.764729 |
| 17.199  | DMTA | 31.3  | 3.564e+01 | -4.336257 |
| 17.199  | DMTA | 33.5  | 3.564e+01 | -2.136257 |
| 17.199  | DMTA | 33.7  | 3.564e+01 | -1.936257 |
| 17.199  | DMTA | 33.2  | 3.564e+01 | -2.436257 |
| 25.798  | DMTA | 19.6  | 2.198e+01 | -2.384745 |
| 25.798  | DMTA | 20.9  | 2.198e+01 | -1.084745 |
| 25.798  | DMTA | 20.9  | 2.198e+01 | -1.084745 |
| 25.798  | DMTA | 19.9  | 2.198e+01 | -2.084745 |
| 34.397  | DMTA | 13.3  | 1.356e+01 | -0.262844 |
| 34.397  | DMTA | 15.8  | 1.356e+01 | 2.237156  |
| 34.397  | DMTA | 18.2  | 1.356e+01 | 4.637156  |
| 34.397  | DMTA | 12.7  | 1.356e+01 | -0.862844 |
| 51.596  | DMTA | 6.7   | 5.162e+00 | 1.538102  |
| 51.596  | DMTA | 8.7   | 5.162e+00 | 3.538102  |
| 51.596  | DMTA | 7.8   | 5.162e+00 | 2.638102  |
| 51.596  | DMTA | 9.0   | 5.162e+00 | 3.838102  |
| 68.795  | DMTA | 8.8   | 1.965e+00 | 6.835427  |
| 68.795  | DMTA | 8.7   | 1.965e+00 | 6.735427  |
| 68.795  | DMTA | 11.4  | 1.965e+00 | 9.435427  |
| 68.795  | DMTA | 9.0   | 1.965e+00 | 7.035427  |
| 103.192 | DMTA | 6.0   | 2.846e-01 | 5.715432  |
| 103.192 | DMTA | 4.4   | 2.846e-01 | 4.115432  |
| 103.192 | DMTA | 3.9   | 2.846e-01 | 3.615432  |
| 103.192 | DMTA | 4.4   | 2.846e-01 | 4.115432  |
| 146.189 | DMTA | 3.3   | 2.543e-02 | 3.274571  |
| 146.189 | DMTA | 2.8   | 2.543e-02 | 2.774571  |
| 146.189 | DMTA | 2.6   | 2.543e-02 | 2.574571  |
| 146.189 | DMTA | 3.4   | 2.543e-02 | 3.374571  |
| 223.583 | DMTA | 1.4   | 3.292e-04 | 1.399671  |
| 223.583 | DMTA | 1.8   | 3.292e-04 | 1.799671  |
| 223.583 | DMTA | 2.0   | 3.292e-04 | 1.999671  |
| 223.583 | DMTA | 1.7   | 3.292e-04 | 1.699671  |
| 3.685   | M23  | 2.8   | 2.280e+00 | 0.519516  |
| 3.685   | M23  | 1.7   | 2.280e+00 | -0.580484 |
| 3.685   | M23  | 2.6   | 2.280e+00 | 0.319516  |
| 3.685   | M23  | 2.4   | 2.280e+00 | 0.119516  |
| 8.599   | M23  | 4.3   | 4.407e+00 | -0.107331 |
| 8.599   | M23  | 5.8   | 4.407e+00 | 1.392669  |
| 8.599   | M23  | 5.5   | 4.407e+00 | 1.092669  |
| 8.599   | M23  | 5.6   | 4.407e+00 | 1.192669  |
| 17.199  | M23  | 8.2   | 6.375e+00 | 1.824928  |
| 17.199  | M23  | 5.2   | 6.375e+00 | -1.175072 |
| 17.199  | M23  | 7.3   | 6.375e+00 | 0.924928  |
| 17.199  | M23  | 6.5   | 6.375e+00 | 0.124928  |
| 25.798  | M23  | 5.1   | 6.966e+00 | -1.865827 |
| 25.798  | M23  | 6.1   | 6.966e+00 | -0.865827 |
| 25.798  | M23  | 5.8   | 6.966e+00 | -1.165827 |
| 25.798  | M23  | 7.7   | 6.966e+00 | 0.734173  |
| 34.397  | M23  | 6.0   | 6.813e+00 | -0.813313 |
| 34.397  | M23  | 6.0   | 6.813e+00 | -0.813313 |
| 34.397  | M23  | 7.8   | 6.813e+00 | 0.986687  |
| 34.397  | M23  | 7.3   | 6.813e+00 | 0.486687  |
| 51.596  | M23  | 5.0   | 5.612e+00 | -0.612020 |

|         |     |      |           |           |
|---------|-----|------|-----------|-----------|
| 51.596  | M23 | 4.2  | 5.612e+00 | -1.412020 |
| 51.596  | M23 | 7.0  | 5.612e+00 | 1.387980  |
| 51.596  | M23 | 6.3  | 5.612e+00 | 0.687980  |
| 68.795  | M23 | 3.9  | 4.213e+00 | -0.313370 |
| 68.795  | M23 | 2.9  | 4.213e+00 | -1.313370 |
| 68.795  | M23 | 4.3  | 4.213e+00 | 0.086630  |
| 68.795  | M23 | 3.8  | 4.213e+00 | -0.413370 |
| 103.192 | M23 | 1.9  | 2.138e+00 | -0.238206 |
| 103.192 | M23 | 1.5  | 2.138e+00 | -0.638206 |
| 103.192 | M23 | 2.6  | 2.138e+00 | 0.461794  |
| 103.192 | M23 | 2.8  | 2.138e+00 | 0.661794  |
| 146.189 | M23 | 2.0  | 8.591e-01 | 1.140919  |
| 146.189 | M23 | 2.3  | 8.591e-01 | 1.440919  |
| 146.189 | M23 | 1.6  | 8.591e-01 | 0.740919  |
| 146.189 | M23 | 1.1  | 8.591e-01 | 0.240919  |
| 223.583 | M23 | 1.2  | 1.608e-01 | 1.039212  |
| 223.583 | M23 | 1.9  | 1.608e-01 | 1.739212  |
| 223.583 | M23 | 1.4  | 1.608e-01 | 1.239212  |
| 223.583 | M23 | 1.3  | 1.608e-01 | 1.139212  |
| 3.685   | M27 | 2.3  | 2.049e+00 | 0.251119  |
| 3.685   | M27 | 2.1  | 2.049e+00 | 0.051119  |
| 3.685   | M27 | 1.0  | 2.049e+00 | -1.048881 |
| 3.685   | M27 | 2.6  | 2.049e+00 | 0.551119  |
| 8.599   | M27 | 4.0  | 4.163e+00 | -0.163233 |
| 8.599   | M27 | 3.4  | 4.163e+00 | -0.763233 |
| 8.599   | M27 | 4.5  | 4.163e+00 | 0.336767  |
| 8.599   | M27 | 4.6  | 4.163e+00 | 0.436767  |
| 17.199  | M27 | 6.6  | 6.615e+00 | -0.014667 |
| 17.199  | M27 | 6.9  | 6.615e+00 | 0.285333  |
| 17.199  | M27 | 7.6  | 6.615e+00 | 0.985333  |
| 17.199  | M27 | 6.7  | 6.615e+00 | 0.085333  |
| 25.798  | M27 | 8.2  | 7.996e+00 | 0.203753  |
| 25.798  | M27 | 8.8  | 7.996e+00 | 0.803753  |
| 25.798  | M27 | 8.7  | 7.996e+00 | 0.703753  |
| 25.798  | M27 | 7.6  | 7.996e+00 | -0.396247 |
| 34.397  | M27 | 9.7  | 8.708e+00 | 0.992431  |
| 34.397  | M27 | 8.8  | 8.708e+00 | 0.092431  |
| 34.397  | M27 | 8.0  | 8.708e+00 | -0.707569 |
| 34.397  | M27 | 8.6  | 8.708e+00 | -0.107569 |
| 51.596  | M27 | 8.3  | 9.025e+00 | -0.724565 |
| 51.596  | M27 | 9.2  | 9.025e+00 | 0.175435  |
| 51.596  | M27 | 7.4  | 9.025e+00 | -1.624565 |
| 51.596  | M27 | 7.2  | 9.025e+00 | -1.824565 |
| 68.795  | M27 | 9.3  | 8.643e+00 | 0.656612  |
| 68.795  | M27 | 8.5  | 8.643e+00 | -0.143388 |
| 68.795  | M27 | 10.3 | 8.643e+00 | 1.656612  |
| 68.795  | M27 | 9.4  | 8.643e+00 | 0.756612  |
| 103.192 | M27 | 8.6  | 7.266e+00 | 1.334360  |
| 103.192 | M27 | 6.0  | 7.266e+00 | -1.265640 |
| 103.192 | M27 | 6.5  | 7.266e+00 | -0.765640 |
| 103.192 | M27 | 6.9  | 7.266e+00 | -0.365640 |
| 146.189 | M27 | 5.6  | 5.482e+00 | 0.118471  |
| 146.189 | M27 | 4.5  | 5.482e+00 | -0.981529 |
| 146.189 | M27 | 4.6  | 5.482e+00 | -0.881529 |
| 146.189 | M27 | 4.5  | 5.482e+00 | -0.981529 |
| 223.583 | M27 | 4.1  | 3.048e+00 | 1.051763  |
| 223.583 | M27 | 3.9  | 3.048e+00 | 0.851763  |
| 223.583 | M27 | 4.3  | 3.048e+00 | 1.251763  |
| 223.583 | M27 | 4.2  | 3.048e+00 | 1.151763  |
| 1.228   | M31 | 1.5  | 7.297e-01 | 0.770323  |
| 1.228   | M31 | 1.3  | 7.297e-01 | 0.570323  |
| 3.685   | M31 | 5.0  | 2.020e+00 | 2.979725  |
| 3.685   | M31 | 2.4  | 2.020e+00 | 0.379725  |
| 3.685   | M31 | 3.1  | 2.020e+00 | 1.079725  |
| 3.685   | M31 | 2.3  | 2.020e+00 | 0.279725  |
| 8.599   | M31 | 4.3  | 4.028e+00 | 0.271927  |
| 8.599   | M31 | 5.0  | 4.028e+00 | 0.971927  |
| 8.599   | M31 | 3.4  | 4.028e+00 | -0.628073 |
| 8.599   | M31 | 4.3  | 4.028e+00 | 0.271927  |

|         |     |     |           |           |
|---------|-----|-----|-----------|-----------|
| 17.199  | M31 | 8.0 | 6.181e+00 | 1.819110  |
| 17.199  | M31 | 7.7 | 6.181e+00 | 1.519110  |
| 17.199  | M31 | 7.8 | 6.181e+00 | 1.619110  |
| 17.199  | M31 | 8.7 | 6.181e+00 | 2.519110  |
| 25.798  | M31 | 7.8 | 7.204e+00 | 0.595782  |
| 25.798  | M31 | 6.5 | 7.204e+00 | -0.704218 |
| 25.798  | M31 | 7.7 | 7.204e+00 | 0.495782  |
| 25.798  | M31 | 6.5 | 7.204e+00 | -0.704218 |
| 34.397  | M31 | 8.0 | 7.556e+00 | 0.444125  |
| 34.397  | M31 | 7.4 | 7.556e+00 | -0.155875 |
| 34.397  | M31 | 6.3 | 7.556e+00 | -1.255875 |
| 34.397  | M31 | 8.7 | 7.556e+00 | 1.144125  |
| 51.596  | M31 | 6.9 | 7.256e+00 | -0.356337 |
| 51.596  | M31 | 9.0 | 7.256e+00 | 1.743663  |
| 51.596  | M31 | 5.7 | 7.256e+00 | -1.556337 |
| 51.596  | M31 | 4.2 | 7.256e+00 | -3.056337 |
| 68.795  | M31 | 5.5 | 6.450e+00 | -0.949610 |
| 68.795  | M31 | 6.1 | 6.450e+00 | -0.349610 |
| 68.795  | M31 | 3.2 | 6.450e+00 | -3.249610 |
| 68.795  | M31 | 4.2 | 6.450e+00 | -2.249610 |
| 103.192 | M31 | 6.1 | 4.730e+00 | 1.370377  |
| 103.192 | M31 | 4.0 | 4.730e+00 | -0.729623 |
| 103.192 | M31 | 3.8 | 4.730e+00 | -0.929623 |
| 103.192 | M31 | 4.0 | 4.730e+00 | -0.729623 |
| 146.189 | M31 | 3.1 | 3.098e+00 | 0.001525  |
| 146.189 | M31 | 2.9 | 3.098e+00 | -0.198475 |
| 146.189 | M31 | 4.5 | 3.098e+00 | 1.401525  |
| 146.189 | M31 | 4.5 | 3.098e+00 | 1.401525  |
| 223.583 | M31 | 1.8 | 1.430e+00 | 0.370323  |
| 223.583 | M31 | 2.6 | 1.430e+00 | 1.170323  |
| 223.583 | M31 | 3.8 | 1.430e+00 | 2.370323  |
| 223.583 | M31 | 2.3 | 1.430e+00 | 0.870323  |

## Listing for the mixed effects model fits for dimethenamid

**Listing 63:** DFOP-SFO3 fit with nlme to dimethenamid data, variance by variable

```

nlme version used for fitting:      3.1.152
mkin version used for pre-fitting:  1.0.4.9000
R version used for fitting:        4.1.0
Date of fit:      Mon Jul 26 15:02:51 2021
Date of summary: Mon Jul 26 18:52:54 2021

Equations:
d_DMTA/dt = - ((k1 * g * exp(-k1 * time) + k2 * (1 - g) * exp(-k2 *
  time)) / (g * exp(-k1 * time) + (1 - g) * exp(-k2 * time)))
  * DMTA
d_M23/dt = + f_DMTA_to_M23 * ((k1 * g * exp(-k1 * time) + k2 * (1 - g)
  * exp(-k2 * time)) / (g * exp(-k1 * time) + (1 - g) *
  exp(-k2 * time))) * DMTA - k_M23 * M23
d_M27/dt = + f_DMTA_to_M27 * ((k1 * g * exp(-k1 * time) + k2 * (1 - g)
  * exp(-k2 * time)) / (g * exp(-k1 * time) + (1 - g) *
  exp(-k2 * time))) * DMTA - k_M27 * M27
d_M31/dt = + f_DMTA_to_M31 * ((k1 * g * exp(-k1 * time) + k2 * (1 - g)
  * exp(-k2 * time)) / (g * exp(-k1 * time) + (1 - g) *
  exp(-k2 * time))) * DMTA - k_M31 * M31

Data:
568 observations of 4 variable(s) grouped in 6 datasets

Model predictions using solution type deSolve

Fitted in 130.155 s using 15 iterations

Variance model: Variance unique to each observed variable

Mean of starting values for individual parameters:
      DMTA_0    log_k_M23    log_k_M27    log_k_M31 f_DMTA_ilr_1 f_DMTA_ilr_2
98.24705      -7.23161     -12.60526      -4.24406      0.07824      0.18195
f_DMTA_ilr_3      log_k1      log_k2      g_qlogis
-1.69698      -2.07754     -13.67191      1.93296

Fixed degradation parameter values:
      value type
M23_0      0 state
M27_0      0 state
M31_0      0 state

Results:

      AIC BIC logLik
1928 2032   -940

Optimised, transformed parameters with symmetric confidence intervals:
      lower      est.      upper
DMTA_0      96.5771  98.04219  99.5073
log_k_M23     -5.4069 -4.36954  -3.3322
log_k_M27     -5.5430 -4.85312  -4.1632
log_k_M31     -4.6289 -4.10548  -3.5820
f_DMTA_ilr_1 -0.3384  0.02432  0.3871
f_DMTA_ilr_2 -0.1979  0.16262  0.5232
f_DMTA_ilr_3 -1.8363 -1.63568  -1.4351
log_k1        -2.6925 -2.42234  -2.1522
log_k2        -4.7307 -4.18912  -3.6476
g_qlogis      -0.5776  1.65647  3.8906

Correlation:
      DMTA_0 l__M23 l__M27 l__M31 f_DMTA__1 f_DMTA__2 f_DMTA__3 log_k1
log_k_M23      -0.011
log_k_M27      -0.011  0.002
log_k_M31      -0.011  0.002  0.002

```

```

f_DMTA_ilr_1 -0.001 0.025 -0.047 0.000
f_DMTA_ilr_2 0.001 0.014 0.028 -0.068 -0.001
f_DMTA_ilr_3 -0.041 0.031 0.049 0.060 0.001 -0.022
log_k1 0.034 0.000 -0.001 -0.001 0.000 0.000 -0.007
log_k2 0.011 0.004 0.006 0.005 0.000 0.000 0.003 0.078
g_qlogis -0.006 -0.003 -0.001 0.000 0.000 0.000 0.000 -0.077
log_k2

```

```

log_k_M23
log_k_M27
log_k_M31
f_DMTA_ilr_1
f_DMTA_ilr_2
f_DMTA_ilr_3
log_k1
log_k2
g_qlogis -0.113

```

Random effects:

Formula: list(DMTA\_0 ~ 1, log\_k\_M23 ~ 1, log\_k\_M27 ~ 1, log\_k\_M31 ~ 1, f\_DMTA\_ilr\_1 ~ 1, f\_DMTA\_ilr\_2 ~ 1, f\_DMTA\_ilr\_3 ~ 1)

Level: ds

Structure: Diagonal

```

      DMTA_0 log_k_M23 log_k_M27 log_k_M31 f_DMTA_ilr_1 f_DMTA_ilr_2
StdDev: 1.609      1.222      0.7834      0.6048      0.4428      0.4335
      f_DMTA_ilr_3 log_k1 log_k2 g_qlogis Residual
StdDev:      0.2385 0.2779 0.4629      2.673      1.81

```

Variance function:

Structure: Different standard deviations per stratum

Formula: ~1 | name

Parameter estimates:

```

      DMTA      M23      M27      M31
1.00000000 0.4854811 0.4549994 0.4811389

```

Backtransformed parameters with asymmetric confidence intervals:

```

      lower      est.      upper
DMTA_0 96.577107 98.042185 99.50726
k_M23 0.004486 0.012657 0.03572
k_M27 0.003915 0.007804 0.01556
k_M31 0.009765 0.016482 0.02782
f_DMTA_to_M23 NA 0.112963 NA
f_DMTA_to_M27 NA 0.109145 NA
f_DMTA_to_M31 NA 0.090985 NA
k1 0.067711 0.088714 0.11623
k2 0.008821 0.015160 0.02605
g 0.359474 0.839763 0.97998

```

Resulting formation fractions:

```

ff
DMTA_M23 0.11296
DMTA_M27 0.10914
DMTA_M31 0.09099
DMTA_sink 0.68691

```

Estimated disappearance times:

```

      DT50 DT90 DT50back DT50_k1 DT50_k2
DMTA 9.508 43.7 13.16 7.813 45.72
M23 54.764 181.9 NA NA NA
M27 88.820 295.1 NA NA NA
M31 42.055 139.7 NA NA NA

```



**Listing 64:** DFOP-SFO3 fit with nlme to dimethenamid data, two-component error

```

nlme version used for fitting:      3.1.152
mkin version used for pre-fitting:  1.0.4.9000
R version used for fitting:        4.1.0
Date of fit:      Mon Jul 26 15:04:44 2021
Date of summary: Mon Jul 26 18:52:54 2021

Equations:
d_DMTA/dt = - ((k1 * g * exp(-k1 * time) + k2 * (1 - g) * exp(-k2 *
time)) / (g * exp(-k1 * time) + (1 - g) * exp(-k2 * time)))
* DMTA
d_M23/dt = + f_DMTA_to_M23 * ((k1 * g * exp(-k1 * time) + k2 * (1 - g)
* exp(-k2 * time)) / (g * exp(-k1 * time) + (1 - g) *
exp(-k2 * time))) * DMTA - k_M23 * M23
d_M27/dt = + f_DMTA_to_M27 * ((k1 * g * exp(-k1 * time) + k2 * (1 - g)
* exp(-k2 * time)) / (g * exp(-k1 * time) + (1 - g) *
exp(-k2 * time))) * DMTA - k_M27 * M27
d_M31/dt = + f_DMTA_to_M31 * ((k1 * g * exp(-k1 * time) + k2 * (1 - g)
* exp(-k2 * time)) / (g * exp(-k1 * time) + (1 - g) *
exp(-k2 * time))) * DMTA - k_M31 * M31

Data:
568 observations of 4 variable(s) grouped in 6 datasets

Model predictions using solution type deSolve

Fitted in 34.399 s using 4 iterations

Variance model: Two-component variance function

Mean of starting values for individual parameters:
      DMTA_0    log_k_M23    log_k_M27    log_k_M31 f_DMTA_ilr_1 f_DMTA_ilr_2
98.72582    -7.58644    -18.75668    -4.28269    0.07539    0.18660
f_DMTA_ilr_3    log_k1    log_k2    g_qlogis
-1.72380    -2.29259    -16.35353    2.63698

Fixed degradation parameter values:
      value type
M23_0    0 state
M27_0    0 state
M31_0    0 state

Results:
      AIC BIC logLik
1876 1972   -916

Optimised, transformed parameters with symmetric confidence intervals:
      lower est. upper
DMTA_0    96.1732 98.11504 100.0569
log_k_M23 -5.3553 -4.36957 -3.3838
log_k_M27 -5.5106 -4.85332 -4.1961
log_k_M31 -4.6286 -4.12125 -3.6139
f_DMTA_ilr_1 -0.3375 0.02163 0.3808
f_DMTA_ilr_2 -0.1920 0.16537 0.5227
f_DMTA_ilr_3 -1.8314 -1.64533 -1.4592
log_k1    -3.2337 -2.74966 -2.2656
log_k2    -4.9620 -4.73125 -4.5005
g_qlogis   2.0739 2.95814 3.8424

Correlation:
      DMTA_0 l__M23 l__M27 l__M31 f_DMTA__1 f_DMTA__2 f_DMTA__3 log_k1
log_k_M23 -0.013
log_k_M27 -0.015 0.001
log_k_M31 -0.014 0.002 0.001
f_DMTA_ilr_1 -0.002 0.026 -0.051 0.000

```

```

f_DMTA_ilr_2 0.001 0.015 0.030 -0.068 -0.002
f_DMTA_ilr_3 -0.075 0.035 0.057 0.065 -0.001 -0.022
log_k1 0.021 -0.003 -0.003 -0.003 0.000 0.000 -0.007
log_k2 0.053 0.000 0.002 0.000 -0.001 0.000 -0.010 0.032
g_qlogis -0.044 0.010 0.008 0.008 0.001 -0.001 0.017 -0.022
log_k2

```

```
log_k_M23
```

```
log_k_M27
```

```
log_k_M31
```

```
f_DMTA_ilr_1
```

```
f_DMTA_ilr_2
```

```
f_DMTA_ilr_3
```

```
log_k1
```

```
log_k2
```

```
g_qlogis -0.240
```

Random effects:

Formula: list(DMTA\_0 ~ 1, log\_k\_M23 ~ 1, log\_k\_M27 ~ 1, log\_k\_M31 ~ 1, f\_DMTA\_ilr\_1 ~ 1, f\_DMTA\_ilr\_2 ~ 1, f\_DMTA\_ilr\_3 ~ 1)

Level: ds

Structure: Diagonal

DMTA\_0 log\_k\_M23 log\_k\_M27 log\_k\_M31 f\_DMTA\_ilr\_1 f\_DMTA\_ilr\_2

StdDev: 1.962 1.163 0.7431 0.5847 0.4378 0.4295

f\_DMTA\_ilr\_3 log\_k1 log\_k2 g\_qlogis Residual

StdDev: 0.2186 0.602 0.0005093 1.02 1

Variance function:

Structure: Constant plus proportion of variance covariate

Formula: ~fitted(.)

Parameter estimates:

const prop

0.86504158 -0.03414532

Backtransformed parameters with asymmetric confidence intervals:

|               | lower     | est.      | upper     |
|---------------|-----------|-----------|-----------|
| DMTA_0        | 96.173151 | 98.115039 | 100.05693 |
| k_M23         | 0.004723  | 0.012657  | 0.03392   |
| k_M27         | 0.004044  | 0.007802  | 0.01505   |
| k_M31         | 0.009769  | 0.016224  | 0.02695   |
| f_DMTA_to_M23 | NA        | 0.112009  | NA        |
| f_DMTA_to_M27 | NA        | 0.108635  | NA        |
| f_DMTA_to_M31 | NA        | 0.090085  | NA        |
| k1            | 0.039411  | 0.063950  | 0.10377   |
| k2            | 0.006999  | 0.008815  | 0.01110   |
| g             | 0.888341  | 0.950647  | 0.97901   |

Resulting formation fractions:

|           | ff      |
|-----------|---------|
| DMTA_M23  | 0.11201 |
| DMTA_M27  | 0.10863 |
| DMTA_M31  | 0.09008 |
| DMTA_sink | 0.68927 |

Estimated disappearance times:

|      | DT50  | DT90   | DT50back | DT50_k1 | DT50_k2 |
|------|-------|--------|----------|---------|---------|
| DMTA | 11.51 | 41.75  | 12.57    | 10.84   | 78.63   |
| M23  | 54.77 | 181.93 | NA       | NA      | NA      |
| M27  | 88.84 | 295.11 | NA       | NA      | NA      |
| M31  | 42.72 | 141.92 | NA       | NA      | NA      |

**Listing 65:** DFOP-SFO3+ fit with nlme to dimethenamid data, variance by variable

```

nlme version used for fitting:      3.1.152
mkin version used for pre-fitting:  1.0.4.9000
R version used for fitting:         4.1.0
Date of fit:      Mon Jul 26 15:04:10 2021
Date of summary: Mon Jul 26 18:52:54 2021

Equations:
d_DMTA/dt = - ((k1 * g * exp(-k1 * time) + k2 * (1 - g) * exp(-k2 *
time)) / (g * exp(-k1 * time) + (1 - g) * exp(-k2 * time)))
* DMTA
d_M23/dt = + f_DMTA_to_M23 * ((k1 * g * exp(-k1 * time) + k2 * (1 - g)
* exp(-k2 * time)) / (g * exp(-k1 * time) + (1 - g) *
exp(-k2 * time))) * DMTA - k_M23 * M23
d_M27/dt = + f_DMTA_to_M27 * ((k1 * g * exp(-k1 * time) + k2 * (1 - g)
* exp(-k2 * time)) / (g * exp(-k1 * time) + (1 - g) *
exp(-k2 * time))) * DMTA - k_M27 * M27 + k_M31 * M31
d_M31/dt = + f_DMTA_to_M31 * ((k1 * g * exp(-k1 * time) + k2 * (1 - g)
* exp(-k2 * time)) / (g * exp(-k1 * time) + (1 - g) *
exp(-k2 * time))) * DMTA - k_M31 * M31

Data:
568 observations of 4 variable(s) grouped in 6 datasets

Model predictions using solution type deSolve

Fitted in 78.786 s using 9 iterations

Variance model: Variance unique to each observed variable

Mean of starting values for individual parameters:
      DMTA_0  log_k_M23  log_k_M27  log_k_M31 f_DMTA_ilr_1 f_DMTA_ilr_2
98.3635    -7.5002    -4.3270    -4.2431    0.1393    0.1443
f_DMTA_ilr_3  log_k1    log_k2    g_qlogis
-1.7386    -3.3253    -6.7463    -1.2510

Fixed degradation parameter values:
      value  type
M23_0      0 state
M27_0      0 state
M31_0      0 state

Results:
      AIC  BIC logLik
1900 2004 -925.9

Optimised, transformed parameters with symmetric confidence intervals:
      lower  est.  upper
DMTA_0    96.5656 97.9905 99.4154
log_k_M23  -4.7006 -4.1878 -3.6750
log_k_M27  -4.4915 -4.0324 -3.5733
log_k_M31  -4.5655 -4.0567 -3.5479
f_DMTA_ilr_1 -0.2640 0.1208 0.5056
f_DMTA_ilr_2 -0.2937 0.1050 0.5037
f_DMTA_ilr_3 -1.8624 -1.6671 -1.4718
log_k1      -2.5552 -2.4968 -2.4383
log_k2      -4.4230 -3.5402 -2.6573
g_qlogis    -2.9618 -0.5579 1.8459

Correlation:
      DMTA_0 l__M23 l__M27 l__M31 f_DMTA__1 f_DMTA__2 f_DMTA__3 log_k1
log_k_M23  -0.016
log_k_M27  -0.013 0.003
log_k_M31  -0.007 0.002 0.065
f_DMTA_ilr_1 -0.001 0.035 -0.016 0.025

```

```

f_DMTA_ilr_2 -0.001 0.020 -0.029 -0.068 -0.023
f_DMTA_ilr_3 -0.042 0.046 0.056 0.028 -0.004 -0.001
log_k1      0.117 -0.011 -0.009 -0.004 0.001 -0.002 -0.029
log_k2      0.007 0.003 0.004 0.004 0.001 -0.001 0.002 0.193
g_qlogis    0.032 -0.008 -0.006 -0.001 -0.001 -0.002 -0.007 -0.105
log_k2

```

```
log_k_M23
```

```
log_k_M27
```

```
log_k_M31
```

```
f_DMTA_ilr_1
```

```
f_DMTA_ilr_2
```

```
f_DMTA_ilr_3
```

```
log_k1
```

```
log_k2
```

```
g_qlogis -0.054
```

Random effects:

Formula: list(DMTA\_0 ~ 1, log\_k\_M23 ~ 1, log\_k\_M27 ~ 1, log\_k\_M31 ~ 1, f\_DMTA\_ilr\_1 ~ 1, f\_DMTA\_ilr\_2 ~ 1, f\_DMTA\_ilr\_3 ~ 1)

Level: ds

Structure: Diagonal

DMTA\_0 log\_k\_M23 log\_k\_M27 log\_k\_M31 f\_DMTA\_ilr\_1 f\_DMTA\_ilr\_2

StdDev: 1.543 0.5957 0.5421 0.5922 0.4668 0.4786

f\_DMTA\_ilr\_3 log\_k1 log\_k2 g\_qlogis Residual

StdDev: 0.2334 1.232e-05 1.023 2.596 1.848

Variance function:

Structure: Different standard deviations per stratum

Formula: ~1 | name

Parameter estimates:

DMTA M23 M27 M31

1.0000000 0.4704774 0.3971208 0.4797798

Backtransformed parameters with asymmetric confidence intervals:

|               | lower    | est.     | upper    |
|---------------|----------|----------|----------|
| DMTA_0        | 96.56558 | 97.99050 | 99.41543 |
| k_M23         | 0.00909  | 0.01518  | 0.02535  |
| k_M27         | 0.01120  | 0.01773  | 0.02806  |
| k_M31         | 0.01041  | 0.01731  | 0.02879  |
| f_DMTA_to_M23 | NA       | 0.11521  | NA       |
| f_DMTA_to_M27 | NA       | 0.09712  | NA       |
| f_DMTA_to_M31 | NA       | 0.09301  | NA       |
| k1            | 0.07767  | 0.08235  | 0.08731  |
| k2            | 0.01200  | 0.02901  | 0.07013  |
| g             | 0.04918  | 0.36403  | 0.86365  |

Resulting formation fractions:

|           | ff      |
|-----------|---------|
| DMTA_M23  | 0.11521 |
| DMTA_M27  | 0.09712 |
| DMTA_M31  | 0.09301 |
| DMTA_sink | 0.69467 |

Estimated disappearance times:

|      | DT50  | DT90  | DT50back | DT50_k1 | DT50_k2 |
|------|-------|-------|----------|---------|---------|
| DMTA | 15.86 | 64.4  | 19.39    | 8.417   | 23.9    |
| M23  | 45.66 | 151.7 | NA       | NA      | NA      |
| M27  | 39.09 | 129.9 | NA       | NA      | NA      |
| M31  | 40.05 | 133.0 | NA       | NA      | NA      |

**Listing 66:** DFOP-SFO3+ fit with nlme to dimethenamid data, two-component error

```

nlme version used for fitting:      3.1.152
mkin version used for pre-fitting:  1.0.4.9000
R version used for fitting:        4.1.0
Date of fit:      Mon Jul 26 15:06:27 2021
Date of summary: Mon Jul 26 18:52:54 2021

Equations:
d_DMTA/dt = - ((k1 * g * exp(-k1 * time) + k2 * (1 - g) * exp(-k2 *
time)) / (g * exp(-k1 * time) + (1 - g) * exp(-k2 * time)))
* DMTA
d_M23/dt = + f_DMTA_to_M23 * ((k1 * g * exp(-k1 * time) + k2 * (1 - g)
* exp(-k2 * time)) / (g * exp(-k1 * time) + (1 - g) *
exp(-k2 * time))) * DMTA - k_M23 * M23
d_M27/dt = + f_DMTA_to_M27 * ((k1 * g * exp(-k1 * time) + k2 * (1 - g)
* exp(-k2 * time)) / (g * exp(-k1 * time) + (1 - g) *
exp(-k2 * time))) * DMTA - k_M27 * M27 + k_M31 * M31
d_M31/dt = + f_DMTA_to_M31 * ((k1 * g * exp(-k1 * time) + k2 * (1 - g)
* exp(-k2 * time)) / (g * exp(-k1 * time) + (1 - g) *
exp(-k2 * time))) * DMTA - k_M31 * M31

Data:
568 observations of 4 variable(s) grouped in 6 datasets

Model predictions using solution type deSolve

Fitted in 102.772 s using 12 iterations

Variance model: Two-component variance function

Mean of starting values for individual parameters:
      DMTA_0  log_k_M23  log_k_M27  log_k_M31 f_DMTA_ilr_1 f_DMTA_ilr_2
98.7698    -7.5225    -4.3377    -4.2477    0.1380    0.1393
f_DMTA_ilr_3  log_k1    log_k2    g_qlogis
-1.7571    -6.0086    -6.7970    0.4502

Fixed degradation parameter values:
      value  type
M23_0      0 state
M27_0      0 state
M31_0      0 state

Results:
      AIC  BIC logLik
1851 1946 -903.3

Optimised, transformed parameters with symmetric confidence intervals:
      lower  est.  upper
DMTA_0    96.2194 98.21002 100.2006
log_k_M23 -5.3780 -4.38060  -3.3832
log_k_M27 -4.4907 -4.05041  -3.6101
log_k_M31 -4.5981 -4.09944  -3.6007
f_DMTA_ilr_1 -0.2581  0.09064  0.4394
f_DMTA_ilr_2 -0.2769  0.11667  0.5103
f_DMTA_ilr_3 -1.8702 -1.68662 -1.5030
log_k1      -3.2294 -2.74475  -2.2601
log_k2      -4.9266 -4.70760  -4.4886
g_qlogis     2.0386  2.92927  3.8199

Correlation:
      DMTA_0 l__M23 l__M27 l__M31 f_DMTA__1 f_DMTA__2 f_DMTA__3 log_k1
log_k_M23  -0.013
log_k_M27  -0.017  0.002
log_k_M31  -0.011  0.001  0.063
f_DMTA_ilr_1 -0.002  0.026 -0.026  0.024

```

```

f_DMTA_ilr_2  0.000  0.013 -0.022 -0.066 -0.026
f_DMTA_ilr_3 -0.074  0.033  0.067  0.033 -0.011    0.001
log_k1        0.021 -0.003 -0.003 -0.002  0.000    0.000   -0.007
log_k2        0.052  0.000  0.002  0.003  0.000   -0.002   -0.010    0.032
g_qlogis      -0.042  0.010  0.010  0.006  0.001    0.001    0.016   -0.021
              log_k2

```

```
log_k_M23
```

```
log_k_M27
```

```
log_k_M31
```

```
f_DMTA_ilr_1
```

```
f_DMTA_ilr_2
```

```
f_DMTA_ilr_3
```

```
log_k1
```

```
log_k2
```

```
g_qlogis      -0.232
```

Random effects:

Formula: list(DMTA\_0 ~ 1, log\_k\_M23 ~ 1, log\_k\_M27 ~ 1, log\_k\_M31 ~ 1, f\_DMTA\_ilr\_1 ~ 1, f\_DMTA\_ilr\_2 ~ 1, f\_DMTA\_ilr\_3 ~ 1)

Level: ds

Structure: Diagonal

DMTA\_0 log\_k\_M23 log\_k\_M27 log\_k\_M31 f\_DMTA\_ilr\_1 f\_DMTA\_ilr\_2

StdDev: 2.019 1.177 0.5163 0.5802 0.4201 0.4731

f\_DMTA\_ilr\_3 log\_k1 log\_k2 g\_qlogis Residual

StdDev: 0.2169 0.6027 3.687e-05 1.032 1

Variance function:

Structure: Constant plus proportion of variance covariate

Formula: ~fitted(.)

Parameter estimates:

const prop

0.83589063 -0.03489602

Backtransformed parameters with asymmetric confidence intervals:

|               | lower     | est.      | upper     |
|---------------|-----------|-----------|-----------|
| DMTA_0        | 96.219417 | 98.210025 | 100.20063 |
| k_M23         | 0.004617  | 0.012518  | 0.03394   |
| k_M27         | 0.011213  | 0.017415  | 0.02705   |
| k_M31         | 0.010070  | 0.016582  | 0.02730   |
| f_DMTA_to_M23 | NA        | 0.111570  | NA        |
| f_DMTA_to_M27 | NA        | 0.098148  | NA        |
| f_DMTA_to_M31 | NA        | 0.090710  | NA        |
| k1            | 0.039582  | 0.064264  | 0.10434   |
| k2            | 0.007251  | 0.009026  | 0.01124   |
| g             | 0.884794  | 0.949275  | 0.97854   |

Resulting formation fractions:

|           | ff      |
|-----------|---------|
| DMTA_M23  | 0.11157 |
| DMTA_M27  | 0.09815 |
| DMTA_M31  | 0.09071 |
| DMTA_sink | 0.69957 |

Estimated disappearance times:

|      | DT50  | DT90   | DT50back | DT50_k1 | DT50_k2 |
|------|-------|--------|----------|---------|---------|
| DMTA | 11.47 | 41.68  | 12.55    | 10.79   | 76.79   |
| M23  | 55.37 | 183.94 | NA       | NA      | NA      |
| M27  | 39.80 | 132.22 | NA       | NA      | NA      |
| M31  | 41.80 | 138.86 | NA       | NA      | NA      |

**Listing 67:** SFO-SFO3 fit with saemix to dimethenamid data, constant variance

```

saemix version used for fitting:      3.1.9000
mkin version used for pre-fitting:    1.0.4.9000
R version used for fitting:           4.1.0
Date of fit:      Mon Jul 26 14:21:05 2021
Date of summary:  Mon Jul 26 18:52:54 2021

Equations:
d_DMTA/dt = - k_DMTA * DMTA
d_M23/dt = + f_DMTA_to_M23 * k_DMTA * DMTA - k_M23 * M23
d_M27/dt = + f_DMTA_to_M27 * k_DMTA * DMTA - k_M27 * M27
d_M31/dt = + f_DMTA_to_M31 * k_DMTA * DMTA - k_M31 * M31

Data:
568 observations of 4 variable(s) grouped in 6 datasets

Model predictions using solution type deSolve

Fitted in 930.764 s using 300, 100 iterations

Variance model: Constant variance

Mean of starting values for individual parameters:
      DMTA_0  log_k_DMTA  log_k_M23  log_k_M27  log_k_M31  f_DMTA_ilr_1
97.36284    -2.87199    -3.83245    -4.48137    -4.17806     0.08517
f_DMTA_ilr_2  f_DMTA_ilr_3
0.18013      -1.67060

Fixed degradation parameter values:
None

Results:

Likelihood computed by importance sampling
      AIC  BIC logLik
2318 2314  -1142

Optimised parameters:
      est.  lower  upper
DMTA_0    97.33282 95.7538 98.9119
log_k_DMTA -2.87270 -3.3602 -2.3852
log_k_M23  -4.17451 -4.9687 -3.3804
log_k_M27  -4.68203 -5.2743 -4.0898
log_k_M31  -4.00045 -4.5787 -3.4222
f_DMTA_ilr_1 0.01341 -0.3498 0.3766
f_DMTA_ilr_2 0.15665 -0.2088 0.5221
f_DMTA_ilr_3 -1.57162 -1.7358 -1.4074

Correlation:
      DMTA_0  l__DMT  l__M23  l__M27  l__M31  f_DMTA__1  f_DMTA__2
log_k_DMTA    0.006
log_k_M23    -0.004 -0.001
log_k_M27    -0.005 -0.001 -0.003
log_k_M31    -0.004 -0.001 -0.003 -0.005
f_DMTA_ilr_1 -0.001 0.000 0.070 -0.086 0.002
f_DMTA_ilr_2 0.000 0.000 0.041 0.053 -0.134 0.001
f_DMTA_ilr_3 -0.029 -0.003 0.088 0.101 0.138 0.013 -0.054

Random effects:
      est.  lower  upper
SD.DMTA_0    1.8349 0.63764 3.0321
SD.log_k_DMTA 0.6089 0.26400 0.9537
SD.log_k_M23  0.9115 0.31716 1.5059
SD.log_k_M27  0.6361 0.17739 1.0947
SD.log_k_M31  0.6225 0.17268 1.0724
SD.f_DMTA_ilr_1 0.4285 0.16092 0.6960

```

```
SD.f_DMTA_ilr_2 0.4169 0.14367 0.6901
SD.f_DMTA_ilr_3 0.1702 0.03916 0.3012
```

Variance model:

```
est. lower upper
a.1 1.59 1.494 1.686
```

Backtransformed parameters:

```
est. lower upper
DMTA_0 97.33282 95.753790 98.91185
k_DMTA 0.05655 0.034729 0.09207
k_M23 0.01538 0.006952 0.03404
k_M27 0.00926 0.005122 0.01674
k_M31 0.01831 0.010268 0.03264
f_DMTA_to_M23 0.11760 NA NA
f_DMTA_to_M27 0.11539 NA NA
f_DMTA_to_M31 0.09615 NA NA
```

Resulting formation fractions:

```
ff
DMTA_M23 0.11760
DMTA_M27 0.11539
DMTA_M31 0.09615
DMTA_sink 0.67087
```

Estimated disappearance times:

```
DT50 DT90
DMTA 12.26 40.72
M23 45.06 149.69
M27 74.85 248.65
M31 37.86 125.77
```



**Listing 68:** SFO-SFO3+ fit with saemix to dimethenamid data, constant variance

```

saemix version used for fitting:      3.1.9000
mkin version used for pre-fitting:    1.0.4.9000
R version used for fitting:          4.1.0
Date of fit:      Mon Jul 26 14:39:14 2021
Date of summary: Mon Jul 26 18:52:54 2021

Equations:
d_DMTA/dt = - k_DMTA * DMTA
d_M23/dt = + f_DMTA_to_M23 * k_DMTA * DMTA - k_M23 * M23
d_M27/dt = + f_DMTA_to_M27 * k_DMTA * DMTA - k_M27 * M27 + k_M31 * M31
d_M31/dt = + f_DMTA_to_M31 * k_DMTA * DMTA - k_M31 * M31

Data:
568 observations of 4 variable(s) grouped in 6 datasets

Model predictions using solution type deSolve

Fitted in 995.729 s using 300, 100 iterations

Variance model: Constant variance

Mean of starting values for individual parameters:
      DMTA_0  log_k_DMTA  log_k_M23  log_k_M27  log_k_M31  f_DMTA_ilr_1
97.3714    -2.8716    -3.8330    -4.1947    -4.1679    0.1423
f_DMTA_ilr_2  f_DMTA_ilr_3
0.1429      -1.7048

Fixed degradation parameter values:
None

Results:

Likelihood computed by importance sampling
      AIC  BIC logLik
2313 2309 -1139

Optimised parameters:
      est.  lower  upper
DMTA_0    97.33597 95.7651 98.9068
log_k_DMTA -2.87257 -3.3602 -2.3849
log_k_M23  -4.17445 -4.9751 -3.3738
log_k_M27  -3.90429 -4.3204 -3.4882
log_k_M31  -4.05223 -4.5861 -3.5183
f_DMTA_ilr_1 0.07194 -0.2754 0.4193
f_DMTA_ilr_2 0.15044 -0.2654 0.5663
f_DMTA_ilr_3 -1.61576 -1.7825 -1.4490

Correlation:
      DMTA_0  l__DMT  l__M23  l__M27  l__M31  f_DMTA__1  f_DMTA__2
log_k_DMTA    0.006
log_k_M23    -0.004 -0.001
log_k_M27    -0.005 -0.001 -0.003
log_k_M31    -0.003 -0.001 -0.001 0.113
f_DMTA_ilr_1 -0.001 0.000 0.072 -0.051 0.050
f_DMTA_ilr_2 0.000 0.000 0.034 -0.044 -0.138 -0.047
f_DMTA_ilr_3 -0.028 -0.003 0.086 0.140 0.077 -0.008 0.000

Random effects:
      est.  lower  upper
SD.DMTA_0    1.8249 0.63345 3.0163
SD.log_k_DMTA 0.6091 0.26410 0.9541
SD.log_k_M23  0.9209 0.32258 1.5192
SD.log_k_M27  0.4608 0.14529 0.7763
SD.log_k_M31  0.5681 0.15033 0.9858
SD.f_DMTA_ilr_1 0.3970 0.13494 0.6590

```

```
SD.f_DMTA_ilr_2 0.4767 0.16659 0.7868
SD.f_DMTA_ilr_3 0.1771 0.04554 0.3087
```

Variance model:

```
      est. lower upper
a.1 1.584 1.488 1.681
```

Backtransformed parameters:

```
      est.      lower      upper
DMTA_0    97.33597 95.765135 98.90681
k_DMTA     0.05655 0.034728 0.09209
k_M23      0.01538 0.006908 0.03426
k_M27      0.02016 0.013294 0.03056
k_M31      0.01738 0.010192 0.02965
f_DMTA_to_M23 0.11809      NA      NA
f_DMTA_to_M27 0.10667      NA      NA
f_DMTA_to_M31 0.09335      NA      NA
```

Resulting formation fractions:

```
      ff
DMTA_M23 0.11809
DMTA_M27 0.10667
DMTA_M31 0.09335
DMTA_sink 0.68190
```

Estimated disappearance times:

```
      DT50  DT90
DMTA 12.26 40.72
M23  45.06 149.68
M27  34.39 114.24
M31  39.87 132.46
```

**Listing 69:** DFOP-SFO3+ fit with saemix to dimethenamid data, two-component error

```

saemix version used for fitting:      3.1.9000
mkin version used for pre-fitting:    1.0.4.9000
R version used for fitting:          4.1.0
Date of fit:      Mon Jul 26 15:00:23 2021
Date of summary: Mon Jul 26 18:52:54 2021

Equations:
d_DMTA/dt = - ((k1 * g * exp(-k1 * time) + k2 * (1 - g) * exp(-k2 *
time)) / (g * exp(-k1 * time) + (1 - g) * exp(-k2 * time)))
* DMTA
d_M23/dt = + f_DMTA_to_M23 * ((k1 * g * exp(-k1 * time) + k2 * (1 - g)
* exp(-k2 * time)) / (g * exp(-k1 * time) + (1 - g) *
exp(-k2 * time))) * DMTA - k_M23 * M23
d_M27/dt = + f_DMTA_to_M27 * ((k1 * g * exp(-k1 * time) + k2 * (1 - g)
* exp(-k2 * time)) / (g * exp(-k1 * time) + (1 - g) *
exp(-k2 * time))) * DMTA - k_M27 * M27 + k_M31 * M31
d_M31/dt = + f_DMTA_to_M31 * ((k1 * g * exp(-k1 * time) + k2 * (1 - g)
* exp(-k2 * time)) / (g * exp(-k1 * time) + (1 - g) *
exp(-k2 * time))) * DMTA - k_M31 * M31

Data:
568 observations of 4 variable(s) grouped in 6 datasets

Model predictions using solution type deSolve

Fitted in 1260.253 s using 300, 100 iterations

Variance model: Two-component variance function

Mean of starting values for individual parameters:
      DMTA_0  log_k_M23  log_k_M27  log_k_M31 f_DMTA_ilr_1 f_DMTA_ilr_2
98.7698    -3.9216    -4.3377    -4.2477    0.1380    0.1393
f_DMTA_ilr_3  log_k1    log_k2    g_qlogis
-1.7571    -2.2341    -3.7763    0.4502

Fixed degradation parameter values:
None

Results:

Likelihood computed by importance sampling
      AIC  BIC logLik
1887 1883 -921.6

Optimised parameters:
      est.  lower  upper
DMTA_0    98.0792 95.9861 100.1722
log_k_M23  -4.3979 -5.3950 -3.4008
log_k_M27  -4.0880 -4.5663 -3.6096
log_k_M31  -4.1245 -4.6470 -3.6020
f_DMTA_ilr_1 0.1026 -0.2727 0.4778
f_DMTA_ilr_2 0.1220 -0.2809 0.5250
f_DMTA_ilr_3 -1.6982 -1.8943 -1.5021
log_k1      -3.2061 -4.0255 -2.3866
log_k2      -3.8016 -4.9281 -2.6751
g_qlogis     1.1415 -2.5388 4.8219

Correlation:
      DMTA_0 l__M23 l__M27 l__M31 f_DMTA__1 f_DMTA__2 f_DMTA__3 log_k1
log_k_M23    -0.019
log_k_M27    -0.024 0.004
log_k_M31    -0.016 0.003 0.085
f_DMTA_ilr_1 -0.003 0.043 -0.034 0.032
f_DMTA_ilr_2 -0.001 0.023 -0.028 -0.088 -0.030
f_DMTA_ilr_3 -0.079 0.053 0.089 0.044 -0.004 0.008

```

|          |        |        |        |        |        |        |        |        |
|----------|--------|--------|--------|--------|--------|--------|--------|--------|
| log_k1   | 0.011  | -0.003 | 0.001  | 0.002  | -0.001 | -0.003 | 0.000  |        |
| log_k2   | 0.032  | 0.001  | -0.005 | -0.003 | 0.001  | 0.000  | -0.014 | 0.027  |
| g_qlogis | -0.056 | 0.006  | 0.009  | 0.004  | 0.001  | 0.002  | 0.022  | -0.112 |

|              |        |
|--------------|--------|
| log_k2       |        |
| log_k_M23    |        |
| log_k_M27    |        |
| log_k_M31    |        |
| f_DMTA_ilr_1 |        |
| f_DMTA_ilr_2 |        |
| f_DMTA_ilr_3 |        |
| log_k1       |        |
| log_k2       |        |
| g_qlogis     | -0.345 |

## Random effects:

|                 | est.   | lower    | upper  |
|-----------------|--------|----------|--------|
| SD.DMTA_0       | 2.1889 | 0.45331  | 3.9245 |
| SD.log_k_M23    | 1.1651 | 0.42863  | 1.9015 |
| SD.log_k_M27    | 0.5506 | 0.19389  | 0.9073 |
| SD.log_k_M31    | 0.5969 | 0.20331  | 0.9905 |
| SD.f_DMTA_ilr_1 | 0.4470 | 0.17115  | 0.7229 |
| SD.f_DMTA_ilr_2 | 0.4783 | 0.18263  | 0.7740 |
| SD.f_DMTA_ilr_3 | 0.2278 | 0.08192  | 0.3737 |
| SD.log_k1       | 0.9785 | 0.38444  | 1.5725 |
| SD.log_k2       | 1.2164 | 0.40211  | 2.0307 |
| SD.g_qlogis     | 2.5805 | -0.30634 | 5.4673 |

## Variance model:

|     | est.    | lower   | upper   |
|-----|---------|---------|---------|
| a.1 | 0.82828 | 0.76311 | 0.89345 |
| b.1 | 0.03577 | 0.02993 | 0.04161 |

## Backtransformed parameters:

|               | est.     | lower     | upper     |
|---------------|----------|-----------|-----------|
| DMTA_0        | 98.07919 | 95.986142 | 100.17224 |
| k_M23         | 0.01230  | 0.004539  | 0.03335   |
| k_M27         | 0.01677  | 0.010396  | 0.02706   |
| k_M31         | 0.01617  | 0.009590  | 0.02727   |
| f_DMTA_to_M23 | 0.11169  | NA        | NA        |
| f_DMTA_to_M27 | 0.09661  | NA        | NA        |
| f_DMTA_to_M31 | 0.08946  | NA        | NA        |
| k1            | 0.04052  | 0.017854  | 0.09194   |
| k2            | 0.02234  | 0.007240  | 0.06890   |
| g             | 0.75796  | 0.073179  | 0.99201   |

## Resulting formation fractions:

|           | ff      |
|-----------|---------|
| DMTA_M23  | 0.11169 |
| DMTA_M27  | 0.09661 |
| DMTA_M31  | 0.08946 |
| DMTA_sink | 0.70225 |

## Estimated disappearance times:

|      | DT50  | DT90   | DT50back | DT50_k1 | DT50_k2 |
|------|-------|--------|----------|---------|---------|
| DMTA | 19.53 | 68.39  | 20.59    | 17.11   | 31.03   |
| M23  | 56.34 | 187.15 | NA       | NA      | NA      |
| M27  | 41.32 | 137.27 | NA       | NA      | NA      |
| M31  | 42.86 | 142.38 | NA       | NA      | NA      |
